# Supplementary material
Source: Research Square preprint supplement (doi:10.21203/rs.3.rs-9418894/v1)
Supplement: Supplementary file 1 [file 0156bd96c65dbf6173dbae22.xlsx]

## Sheet: Supplementary Table 1
Age-residualized VAE results
fdr	feature_a_original_name	omic_original_name	omic_original_name_lower	omic_original_name_final	n_runs	percent_reproducibility	avg_bayes_k	sd_bayes_k	gene_name	gene_id	transcript_id	protein_id	uniprot
1e-08	Direct_bilirubin_umol_L_PGS000681	succinimide	succinimide	succinimide	10	100	18.4207	3.74e-15
1e-08	Timmers_healthspan	ALKALINE PHOSPHATASE	alkaline phosphatase	alkaline phosphatase	10	100	-5.98194	4.43329
1e-08	amyotrophic_lateral_sclerosis	FERRITIN	ferritin	ferritin	10	100	4.49289	0.510592
1e-08	Direct_bilirubin_umol_L_PGS000681	biliverdin	biliverdin	biliverdin	10	100	18.4207	3.74e-15
1e-08	HDL_cholesterol_PGS002781	HDL CHOL DIRECT	hdl chol direct	hdl chol direct	10	100	17.2981	3.55005
1e-08	Direct_bilirubin_umol_L_PGS000681	BILIRUBIN, TOTAL	bilirubin, total	bilirubin, total	10	100	18.4207	3.74e-15
1e-08	Direct_bilirubin_umol_L_PGS000681	X - 11522	x - 11522	x - 11522	10	100	17.2978	3.55101
1e-08	Direct_bilirubin_umol_L_PGS000681	X - 11530	x - 11530	x - 11530	10	100	17.228	3.77163
1e-08	Direct_bilirubin_umol_L_PGS000681	X - 16946	x - 16946	x - 16946	10	100	16.1038	4.88721
1e-08	Direct_bilirubin_umol_L_PGS000681	X - 21448	x - 21448	x - 21448	10	100	14.867	5.72793
1e-08	Direct_bilirubin_umol_L_PGS000681	bilirubin (E,E)*	bilirubin (e,e)*	bilirubin (e,e)*	10	100	13.9186	5.81216
1e-08	Direct_bilirubin_umol_L_PGS000681	bilirubin (E,Z or Z,E)*	bilirubin (e,z or z,e)*	bilirubin (e,z or z,e)*	10	100	18.4207	3.74e-15
1e-08	Direct_bilirubin_umol_L_PGS000681	bilirubin (Z,Z)	bilirubin (z,z)	bilirubin (z,z)	10	100	18.4207	3.74e-15
1e-08	Timmers_longevity	X - 12729	x - 12729	x - 12729	10	100	-8.35584	5.33924
0.000100186	LDL_cholesterol_PGS003873	LDL-CHOL CALCULATION	ldl-chol calculation	ldl-chol calculation	10	100	5.55855	1.08397
0.000187698	Alzheimer_disease_late_onset_PGS000053	chemokine (C-C motif) ligand 13	chemokine(c-c motif)ligand13	chemokine (c-c motif) ligand 13	10	100	5.05393	0.613609	CCL13	ENSG00000181374	ENST00000225844	ENSP00000225844	Q99616
0.000302948	Type_2_diabetes_SNPs_insulin_action_PGS000850	interleukin 2	interleukin 2	IL2	10	100	5.28415	0.600546	IL2	ENSG00000109471	ENST00000226730	ENSP00000226730	P60568
0.00020514	Timmers_healthspan	N-methylproline	n-methylproline	n-methylproline	10	100	5.63261	0.592069
0.000729517	T2D_cases_vs_HbA1c_filtered_controls_PGS000712	UREA NITROGEN	urea nitrogen	urea nitrogen	10	100	3.80045	1.25321
0.00139334	Alzheimer_disease_late_onset_PGS000053	3-aminoisobutyrate	3-aminoisobutyrate	3-aminoisobutyrate	10	100	4.65932	0.537778
0.00130334	Parkinson_disease_PGS000903	4-hydroxyphenylpyruvate	4OHphenylpyruvate	4-hydroxyphenylpyruvate	10	100	4.78829	0.634446
0.0011833	Alzheimer_disease_late_onset_PGS000053	p-cresol glucuronide*	p-cresol glucuronide*	p-cresol glucuronide*	10	100	4.58872	0.815712
0.00141972	amyotrophic_lateral_sclerosis	OMEGA_6_TOTAL	omega_6_total	omega_6_total	10	100	3.58581	1.07082
0.00114378	Coronary_atherosclerosis_PGS002048	signaling lymphocytic activation molecule family member 1	slamf1	SLAMF1	10	100	-5.11341	0.355156	SLAMF1	ENSG00000117090	ENST00000302035,ENST00000235739	ENSP00000306190,ENSP00000235739	Q13291
0.00182693	LDL_cholesterol_PGS003873	16a-hydroxy DHEA 3-sulfate	16a-hydroxy dhea 3-sulfate	16a-hydroxy dhea 3-sulfate	10	100	4.33802	0.61779
0.00220885	frailty	CALCIUM	calcium	calcium	10	100	-4.7072	0.366809
0.00182213	Type_2_diabetes_SNPs_insulin_action_secretion_PGS000851	interleukin 10 receptor, alpha	interleukin 10 receptor, alpha	IL10RA	10	100	4.20553	0.683907	IL10RA	ENSG00000110324	ENST00000227752	ENSP00000227752	Q13651
0.00287424	Coronary_artery_disease_PGS004941	pyridoxate	pyridoxate	pyridoxate	10	100	4.2092	0.628162
0.00281539	HDL_cholesterol_PGS002781	methyl glucopyranoside (alpha + beta)	methyl glucopyranoside(alpha+beta)	methyl glucopyranoside (alpha + beta)	10	100	4.15481	0.618695
0.0032719	Type_2_diabetes_SNPs_insulin_action_secretion_PGS000851	fibroblast growth factor 23	fgf 23	fibroblast growth factor 23	10	100	4.25244	0.542485	FGF23	ENSG00000118972	ENST00000237837	ENSP00000237837	Q9GZV9
0.0032719	Type_2_diabetes_SNPs_insulin_action_secretion_PGS000851	fibroblast growth factor 23	fgf 23	fibroblast growth factor 23	10	100	4.25244	0.542485	FGF23	ENSG00000118972	ENST00000237837	ENSP00000237837	Q9GZV9
0.00333198	T2D_cases_vs_HbA1c_filtered_controls_PGS000712	BUN/CREAT RATIO	bun/creat ratio	bun/creat ratio	10	100	3.72519	0.890852
0.00291518	HDL_cholesterol_PGS002781	S-methylcysteine sulfoxide	s-methylcysteine sulfoxide	s-methylcysteine sulfoxide	10	100	-4.31745	0.387045
0.00336782	Timmers_longevity	X - 21467	x - 21467	x - 21467	10	100	4.48407	0.356948
0.00348552	LDL_cholesterol_PGS003873	andro steroid monosulfate C19H28O6S (1)*	andro steroid monosulfate c19h28o6s (1)*	Andro-MS	10	100	4.43142	0.331283
0.00383603	HDL_cholesterol_PGS002781	heme oxygenase (decycling) 1	heme oxygenase (decycling) 1	heme oxygenase (decycling) 1	10	100	4.24617	0.453702	HMOX1	ENSG00000100292	ENST00000216117	ENSP00000216117	P09601
0.0034742	T2D_cases_vs_HbA1c_filtered_controls_PGS000712	X - 23739	x - 23739	x - 23739	10	100	4.16526	0.452889
0.00354589	HDL_cholesterol_PGS002781	S-methylcysteine	s-methylcysteine	s-methylcysteine	10	100	-4.15467	0.409068
0.00387549	Longevity_PGS000906	homocitrulline	homocitrulline	homocitrulline	10	100	-3.78905	0.562272
0.00393721	Coronary_atherosclerosis_PGS002048	maleate	maleate	maleate	10	100	-4.01959	0.471672
0.00405564	Coronary_artery_disease_PGS004941	cholate	cholate	cholate	10	100	3.79012	0.726625
0.00417225	Longevity_PGS000906	X - 12007	x - 12007	x - 12007	10	100	-4.122	0.56931
0.00395462	Alzheimer_disease_late_onset_PGS000053	chemokine (C-C motif) ligand 24	chemokine (c-c motif) ligand 24	chemokine (c-c motif) ligand 24	10	100	4.03472	0.381509	CCL24	ENSG00000106178,ENSG00000262306	ENST00000222902,ENST00000416943,ENST00000573227,ENST00000576649	ENSP00000222902,ENSP00000400533,ENSP00000461512,ENSP00000461415	O00175
0.00458866	Timmers_lifespan	5alpha-pregnan-3beta,20alpha-diol monosulfate (2)	5alpha-preg-3b,20a-diol MS(2)	5Œ±-Preg-MS2	10	100	-3.79672	0.805564
0.00441722	Coronary_atherosclerosis_PGS002048	glycerophosphorylcholine (GPC)	glycerophosphorylcholine	glycerophosphorylcholine (gpc)	10	100	4.00704	0.507077
0.00461667	Coronary_atherosclerosis_PGS002048	stachydrine	stachydrine	stachydrine	10	100	-4.00468	0.576052
0.00408511	HDL_cholesterol_PGS002781	VITAMIN D, 25-OH TOT	vitamin D	vitamin D	10	100	-3.8162	0.564418
0.00513472	frailty	21-hydroxypregnenolone disulfate	21-hydroxypregnenolone disulfate	21-hydroxypregnenolone disulfate	10	100	-3.46122	0.664218
0.00489983	Timmers_lifespan	5alpha-pregnan-3beta,20beta-diol monosulfate (1)	5alpha-preg-3b,20a-diol MS(1)	5Œ±-Preg-MS	10	100	-3.88337	0.588214
0.00507991	Longevity_PGS000906	3-hydroxypyridine sulfate	3-hydroxypyridine sulfate	3-hydroxypyridine sulfate	10	100	-3.74009	0.570611
0.00564901	Coronary_atherosclerosis_PGS002048	chemokine (C-C motif) ligand 15	chemokine(c-c motif)lig15	chemokine (c-c motif) ligand 15	10	100	-3.78984	0.714064	CCL15	ENSG00000267596	ENST00000354059	ENSP00000293276	Q16663
0.00568785	Timmers_healthspan	chemokine (C-C motif) ligand 19	chemokine (c-c motif) ligand 19	chemokine (c-c motif) ligand 19	10	100	3.94896	0.358197	CCL19	ENSG00000172724	ENST00000311925	ENSP00000308815	Q99731
0.00522785	Heart_failure_PGS001790	tetradecanedioate (C14-DC)	tetradecanedioate (c14-dc)	tetradecanedioate (c14-dc)	10	100	3.84378	0.413768
0.00496758	Coronary_artery_disease_PGS004941	2-hydroxyhippurate (salicylurate)	2-hydroxyhippurate	2-hydroxyhippurate (salicylurate)	10	100	4.04779	0.377246
0.00542119	Longevity_PGS000906	3-methyl catechol sulfate (1)	3-methyl catechol sulfate (1)	3-methyl catechol sulfate (1)	10	100	-3.9704	0.347986
0.00551628	LDL_cholesterol_PGS003873	hydroquinone sulfate	hydroquinone sulfate	hydroquinone sulfate	10	100	-3.73777	0.571695
0.00600465	Timmers_healthspan	iminodiacetate (IDA)	iminodiacetate (ida)	iminodiacetate (ida)	10	100	-3.83995	0.441093
0.00619043	Alzheimer_disease_late_onset_PGS000053	metabolonic lactone sulfate	metabolonic lactone sulfate	metabolonic lactone sulfate	10	100	-3.72076	0.373215
0.00585828	Heart_failure_PGS001790	X - 24243	x - 24243	x - 24243	10	100	-3.76545	0.420689
0.00631895	Timmers_healthspan	propionylglycine	propionylglycine	propionylglycine	10	100	3.99358	0.387209
0.00662643	Alzheimer_disease_late_onset_PGS000053	heme oxygenase (decycling) 1	heme oxygenase (decycling) 1	heme oxygenase (decycling) 1	10	100	-3.82326	0.336527	HMOX1	ENSG00000100292	ENST00000216117	ENSP00000216117	P09601
0.00654812	Type_2_diabetes_T2D_PGS004923	N-acetylmethionine	n-acetylmethionine	n-acetylmethionine	10	100	-3.88685	0.311442
0.00648556	Type_2_diabetes_SNPs_insulin_action_PGS000850	N-acetylmethionine	n-acetylmethionine	n-acetylmethionine	10	100	-3.98752	0.447911
0.00598173	Coronary_vascular_disease_CVD_PGS004514	FERRITIN	ferritin	ferritin	10	100	-3.11906	0.696282
0.00693877	Type_2_diabetes_SNPs_insulin_action_secretion_PGS000851	gastric intrinsic factor (vitamin B synthesis)	gastric intrinsic factor	GIF	10	100	3.783	0.384044	GIF	ENSG00000134812	ENST00000257248,ENST00000541311	ENSP00000257248,ENSP00000440427	P27352
0.00741049	Type_2_diabetes_SNPs_insulin_action_PGS000850	2,3-dihydroxyisovalerate	2,3-dihydroxyisovalerate	2,3-dihydroxyisovalerate	10	100	3.63967	0.352612
0.00653771	Type_2_diabetes_SNPs_insulin_action_secretion_PGS000851	pregnenetriol disulfate*	pregnenetriol disulfate*	pregnenetriol disulfate*	10	100	-3.65622	0.331029
0.00722872	Timmers_longevity	interleukin 17C	interleukin 17c	interleukin 17c	10	100	-3.55174	0.386148	IL17C	ENSG00000124391	ENST00000244241	ENSP00000244241	Q9P0M4
0.00649075	Cardiovascular_disease_PGS002316	interleukin 2	interleukin 2	IL2	10	100	-3.29981	0.410121	IL2	ENSG00000109471	ENST00000226730	ENSP00000226730	P60568
0.00728756	Cardiovascular_disease_PGS002316	N-terminal prohormone brain natriuretic peptide	n-terminal prohorm brain natriuretic pep	n-terminal prohormone brain natriuretic peptide	10	100	-3.88955	0.245462	NT-proBNP				NT-proBNP
0.00728756	Cardiovascular_disease_PGS002316	N-terminal prohormone brain natriuretic peptide	n-terminal prohorm brain natriuretic pep	n-terminal prohormone brain natriuretic peptide	10	100	-3.88955	0.245462	NT-proBNP				NT-proBNP
0.00713826	Timmers_healthspan	gastric intrinsic factor (vitamin B synthesis)	gastric intrinsic factor	GIF	10	100	3.86902	0.390406	GIF	ENSG00000134812	ENST00000257248,ENST00000541311	ENSP00000257248,ENSP00000440427	P27352
0.00748003	Parkinson_disease_PGS000903	1-stearoyl-2-oleoyl-GPI (18:0/18:1)*	1-stearoyl-2-oleoyl-gpi (18:0/18:1)*	1-stearoyl-2-oleoyl-gpi (18:0/18:1)*	10	100	-3.36735	0.495301
0.00726932	Alzheimer_disease_late_onset_PGS000053	3-bromo-5-chloro-2,6-dihydroxybenzoic acid*	3-bromo-5-chloro-2,6-dihydroxybenzoic acid*	3-bromo-5-chloro-2,6-dihydroxybenzoic acid*	10	100	-3.81382	0.358392
0.0077003	Timmers_healthspan	N-acetylglutamine	n-acetylglutamine	n-acetylglutamine	10	100	3.36724	0.569095
0.00681046	Heart_failure_PGS001790	X - 13728	x - 13728	x - 13728	10	100	-3.70956	0.398186
0.00684177	Alzheimers_PGS002753	OMEGA_6_TOTAL	omega_6_total	omega_6_total	10	100	3.25034	0.507876
0.00763579	Alzheimer_disease_late_onset_PGS000053	c-mer proto-oncogene tyrosine kinase	c-mer proto-oncogene tyrosine kinase	c-mer proto-oncogene tyrosine kinase	10	100	3.32113	0.53879	MERTK	ENSG00000153208	ENST00000295408,ENST00000421804	ENSP00000295408,ENSP00000389152	Q12866
0.007926	T2D_cases_vs_HbA1c_filtered_controls_PGS000712	interleukin 1 receptor-like 2	interleukin 1 receptor-like 2	interleukin 1 receptor-like 2	10	100	-3.51661	0.403427	IL1RL2	ENSG00000115598	ENST00000264257,ENST00000539491	ENSP00000264257,ENSP00000442184	Q9HB29
0.00696678	mvAge	N-methylproline	n-methylproline	n-methylproline	10	100	3.6	0.373681
0.00768512	Timmers_lifespan	tyrosine	tyrosine	tyrosine	10	100	3.95936	0.237025
0.00780748	HDL_cholesterol_PGS002781	X - 12680	x - 12680	x - 12680	10	100	-3.53275	0.495476
0.00779929	Timmers_longevity	X - 11795	x - 11795	x - 11795	10	100	-3.85535	0.311775
0.00794753	HDL_cholesterol_PGS002781	interleukin 22 receptor, alpha 1	interleukin 22RA1	interleukin 22 receptor, alpha 1	10	100	3.47873	0.505888	IL22RA1	ENSG00000142677	ENST00000270800	ENSP00000270800	Q8N6P7
0.00799668	Timmers_longevity	POTASSIUM	potassium	potassium	10	100	-3.66202	0.353569
0.00837847	Timmers_longevity	surfactant protein D	surfactant protein d	surfactant protein d	10	100	3.67461	0.384667	SFTPD	ENSG00000133661	ENST00000372292	ENSP00000361366	P35247
0.00803374	LDL_cholesterol_PGS003873	hepatitis A virus cellular receptor 1	hepatitis a virus cellular receptor 1	hepatitis a virus cellular receptor 1	10	100	3.78878	0.285702	HAVCR1	ENSG00000113249	ENST00000523175,ENST00000339252,ENST00000544197	ENSP00000427898,ENSP00000344844,ENSP00000440258	Q96D42
0.00803374	LDL_cholesterol_PGS003873	hepatitis A virus cellular receptor 1	hepatitis a virus cellular receptor 1	hepatitis a virus cellular receptor 1	10	100	3.78878	0.285702	HAVCR1	ENSG00000113249	ENST00000523175,ENST00000339252,ENST00000544197	ENSP00000427898,ENSP00000344844,ENSP00000440258	Q96D42
0.0086592	HDL_cholesterol_PGS002781	sphingomyelin (d18:2/23:0, d18:1/23:1, d17:1/24:1)*	sphingomyelin (d18:2/23:0, d18:1/23:1, d17:1/24:1)*	sphingomyelin (d18:2/23:0, d18:1/23:1, d17:1/24:1)*	10	100	3.56437	0.413094
0.00826397	Coronary_artery_disease_PGS004941	N-acetylmethionine	n-acetylmethionine	n-acetylmethionine	10	100	-3.74511	0.41412
0.00845349	Parkinson_disease_PGS000903	iduronidase, alpha-L-	iduronidase, alpha-l-	iduronidase, alpha-l-	10	100	-3.60825	0.462885	IDUA	ENSG00000127415	ENST00000247933	ENSP00000247933	P35475
0.00783205	Type_2_diabetes_SNPs_insulin_action_PGS000850	TRIGLYCERIDES	triglycerides	triglycerides	10	100	3.0392	0.536227
0.00863303	Parkinson_disease_PGS000903	ascorbic acid 3-sulfate*	ascorbic acid 3-sulfate*	ascorbic acid 3-sulfate*	10	100	-3.47221	0.566927
0.00907774	Coronary_artery_disease_PGS004941	salicylate	salicylate	salicylate	10	100	3.21279	0.451454
0.00914348	Timmers_longevity	4-hydroxychlorothalonil	4-hydroxychlorothalonil	4-hydroxychlorothalonil	10	100	3.6928	0.292833
0.00903369	Timmers_longevity	X - 18922	x - 18922	x - 18922	10	100	3.63161	0.358039
0.00920846	Coronary_artery_disease_PGS004941	2-hydroxydecanoate	2-hydroxydecanoate	2-hydroxydecanoate	10	100	3.42254	0.400079
0.00881154	Alzheimers_PGS002753	isoursodeoxycholate	isoursodeoxycholate	isoursodeoxycholate	10	100	-3.46674	0.549035
0.0091325	Longevity_PGS000906	renin	renin	renin	10	100	3.58655	0.436458	REN	ENSG00000143839	ENST00000272190,ENST00000367195	ENSP00000272190,ENSP00000356163	P00797
0.00941131	Type_2_diabetes_SNPs_insulin_action_secretion_PGS000851	growth differentiation factor 15	growth differentiation factor 15	growth differentiation factor 15	10	100	3.56783	0.295023	GDF15	ENSG00000130513	ENST00000595973,ENST00000252809	ENSP00000470531,ENSP00000252809	Q99988
0.00786747	Alzheimer_disease_late_onset_PGS000053	chymotrypsin C (caldecrin)	chymotrypsin c (caldecrin)	chymotrypsin c (caldecrin)	10	100	-3.80011	0.243289	CTRC	ENSG00000162438	ENST00000375949	ENSP00000365116	Q99895
0.00906182	Timmers_longevity	AXL receptor tyrosine kinase	axl receptor tyrosine kinase	axl receptor tyrosine kinase	10	100	-3.49092	0.321102	AXL	ENSG00000167601	ENST00000301178,ENST00000359092	ENSP00000301178,ENSP00000351995	P30530
0.0094674	frailty	pregnenediol sulfate (C21H34O5S)*	pregnenediol sulfate (c21h34o5s)*	pregnenediol sulfate (c21h34o5s)*	10	100	-3.77891	0.195318
0.00833122	frailty	dodecanedioate (C12-DC)	dodecanedioate (c12-dc)	dodecanedioate (c12-dc)	10	100	3.7578	0.274983
0.00933747	Type_2_diabetes_SNPs_insulin_action_secretion_PGS000851	glycochenodeoxycholate 3-sulfate	glycochenodeoxychola-3-so4	glycochenodeoxycholate 3-sulfate	10	100	-3.28756	0.380055
0.00849697	Cardiovascular_disease_PGS002316	phenylalanyltryptophan	phenylalanyltryptophan	phenylalanyltryptophan	10	100	-3.77628	0.257069
0.00965807	LDL_cholesterol_PGS003873	maleate	maleate	maleate	10	100	-3.29014	0.417249
0.00858423	HDL_cholesterol_PGS002781	fibroblast growth factor 5	fibroblast growth factor 5	fibroblast growth factor 5	10	100	3.38133	0.411323	FGF5	ENSG00000138675	ENST00000456523,ENST00000312465	ENSP00000398353,ENSP00000311697	Q8NF90
0.00979221	HDL_cholesterol_PGS002781	interleukin 1 receptor-like 1	interleukin 1 receptor-like 1	IL1RL1	10	100	-3.63249	0.381399	IL1RL1	ENSG00000115602	ENST00000233954,ENST00000311734,ENST00000427077,ENST00000393393	ENSP00000233954,ENSP00000310371,ENSP00000391120,ENSP00000377052	Q01638
0.00974993	Timmers_longevity	interleukin 24	interleukin 24	IL24	10	100	-3.54274	0.257332	IL24	ENSG00000162892	ENST00000391929,ENST00000294984,ENST00000367093	ENSP00000375795,ENSP00000294984,ENSP00000356060	Q13007
0.00983303	Timmers_longevity	glycodeoxycholate 3-sulfate	glycodeoxycholate 3-sulfate	glycodeoxycholate 3-sulfate	10	100	3.44686	0.274746
0.00872968	Timmers_longevity	1,5-anhydroglucitol (1,5-AG)	1,5-anhydroglucitol (1,5-ag)	1,5-anhydroglucitol (1,5-ag)	10	100	-3.5567	0.272428
0.00960631	Timmers_longevity	thymol sulfate	thymol sulfate	thymol sulfate	10	100	-3.70709	0.310556
0.00998986	T2D_cases_vs_HbA1c_filtered_controls_PGS000712	arginine	arginine	arginine	10	100	3.51631	0.260725
0.00987557	frailty	linoleoylcarnitine (C18:2)*	linoleoylcarnitine (c18:2)*	linoleoylcarnitine (c18:2)*	10	100	3.44059	0.343195
0.00898951	Longevity_PGS000906	CREATININE ENZ, SER	creatinine enz, ser	creatinine enz, ser	10	100	-3.20982	0.440354
0.0101022	T2D_cases_vs_HbA1c_filtered_controls_PGS000712	surfactant protein D	surfactant protein d	surfactant protein d	10	100	3.398	0.513677	SFTPD	ENSG00000133661	ENST00000372292	ENSP00000361366	P35247
0.0104137	Heart_failure_PGS001790	tetradecadienedioate (C14:2-DC)*	tetradecadienedioate*	tetradecadienedioate (c14:2-dc)*	10	100	3.25448	0.439454
0.00913061	HDL_cholesterol_PGS002781	1-palmityl-2-oleoyl-GPC (O-16:0/18:1)*	1-palmityl-2-oleoyl-gpc (o-16:0/18:1)*	1-palmityl-2-oleoyl-gpc (o-16:0/18:1)*	10	100	3.70961	0.214819
0.0100113	T2D_cases_vs_HbA1c_filtered_controls_PGS000712	tyrosine	tyrosine	tyrosine	10	100	3.53727	0.344567
0.0105044	LDL_cholesterol_PGS003873	2-ketocaprylate	2-ketocaprylate	2-ketocaprylate	10	100	3.45821	0.460605
0.0101771	Alzheimer_disease_late_onset_PGS000053	X - 12216	x - 12216	x - 12216	10	100	3.511	0.413166
0.0110653	Timmers_longevity	1-stearoyl-GPI (18:0)	1-stearoyl-gpi (18:0)	1-stearoyl-gpi (18:0)	10	100	-3.46066	0.41797
0.0104752	Alzheimer_disease_late_onset_PGS000053	sphingomyelin (d18:1/18:1, d18:2/18:0)	sphingomyelin (d18:1/18:1, d18:2/18:0)	sphingomyelin (d18:1/18:1, d18:2/18:0)	10	100	3.25894	0.366518
0.00958355	Timmers_healthspan	sarcosine	sarcosine	sarcosine	10	100	-3.35208	0.374856
0.0110577	HDL_cholesterol_PGS002781	androstenediol (3alpha, 17alpha) monosulfate (2)	androstenediol(3alpha, 17alpha)monosulfate(2)	androstenediol (3alpha, 17alpha) monosulfate (2)	10	100	3.38804	0.439571
0.0109646	Type_2_diabetes_SNPs_insulin_action_secretion_PGS000851	HOMOCYSTEINE, SERUM	homocysteine, serum	homocysteine, serum	10	100	-3.70144	0.200794
0.0107654	Heart_failure_PGS001790	X - 11847	x - 11847	x - 11847	10	100	-3.19155	0.440843
0.0112403	frailty	decadienedioic acid (C10:2-DC)**	decadienedioic acid (c10:2-dc)**	decadienedioic acid (c10:2-dc)**	10	100	3.41586	0.423166
0.0101089	Alzheimers_PGS002753	interleukin 12B	interleukin 12b	interleukin 12b	10	100	3.3718	0.435587
0.0115918	T2D_cases_vs_HbA1c_filtered_controls_PGS000712	gamma-glutamylthreonine	gamma-glutamylthreonine	gamma-glutamylthreonine	10	100	3.60661	0.278013
0.0111088	LDL_cholesterol_PGS003873	X - 12849	x - 12849	x - 12849	10	100	-3.41329	0.482081
0.0114068	Coronary_vascular_disease_CVD_PGS004514	4-guanidinobutanoate	4-guanidinobutanoate	4-guanidinobutanoate	10	100	3.39341	0.496044
0.0112816	Type_2_diabetes_SNPs_insulin_action_PGS000850	cis-4-decenoylcarnitine (C10:1)	cis-4-decenoylcarnitine (c10:1)	cis-4-decenoylcarnitine (c10:1)	10	100	-3.43496	0.290844
0.0100168	LDL_cholesterol_PGS003873	glycerophosphorylcholine (GPC)	glycerophosphorylcholine	glycerophosphorylcholine (gpc)	10	100	3.27516	0.33971
0.0116216	T2D_cases_vs_HbA1c_filtered_controls_PGS000712	imidazole propionate	imidazole propionate	imidazole propionate	10	100	-3.22284	0.555392
0.0120282	mvAge	5alpha-pregnan-3beta,20beta-diol monosulfate (1)	5alpha-preg-3b,20a-diol MS(1)	5Œ±-Preg-MS	10	100	-3.3474	0.280729
0.0113112	Parkinson_disease_PGS000903	V-set and immunoglobulin domain containing 2	v-set igg domain containing 2	v-set and immunoglobulin domain containing 2	10	100	3.35939	0.362321	VSIG2	ENSG00000019102	ENST00000326621,ENST00000403470	ENSP00000318684,ENSP00000385013	Q96IQ7
0.0116104	Longevity_PGS000906	octadecadienedioate (C18:2-DC)*	octadecadienedioate (c18:2-dc)*	octadecadienedioate (c18:2-dc)*	10	100	-3.47404	0.289028
0.0102087	Parkinson_disease_PGS000903	glycine	glycine	glycine	10	100	-3.0104	0.35379
0.011576	HDL_cholesterol_PGS002781	ceramide (d18:1/20:0, d16:1/22:0, d20:1/18:0)*	ceramide (d18:1/20:0, d16:1/22:0, d20:1/18:0)*	ceramide (d18:1/20:0, d16:1/22:0, d20:1/18:0)*	10	100	-3.32584	0.320216
0.0123274	mvAge	decadienedioic acid (C10:2-DC)**	decadienedioic acid (c10:2-dc)**	decadienedioic acid (c10:2-dc)**	10	100	-3.4425	0.278783
0.012041	Type_2_diabetes_SNPs_insulin_action_secretion_PGS000851	X - 23974	x - 23974	x - 23974	10	100	-3.1947	0.503287
0.0104273	Type_2_diabetes_SNPs_insulin_action_PGS000850	picolinate	picolinate	picolinate	10	100	3.26723	0.303604
0.0123845	Timmers_lifespan	thymic stromal lymphopoietin	thymic stromal lymphopoietin	thymic stromal lymphopoietin	10	100	-3.24235	0.303973	TSLP	ENSG00000145777	ENST00000420978,ENST00000344895	ENSP00000399099,ENSP00000339804	Q969D9
0.0125408	Cardiovascular_disease_PGS002316	secretoglobin, family 3A, member 2	secretoglobin, family 3a, member 2	secretoglobin, family 3a, member 2	10	100	3.32986	0.429632	SCGB3A2	ENSG00000164265	ENST00000296694	ENSP00000296694	Q96PL1
0.0108288	Longevity_PGS000906	glycosyl-N-behenoyl-sphingadienine (d18:2/22:0)*	glycosyl-n-behenoyl-sphingadienine (d18:2/22:0)*	glycosyl-n-behenoyl-sphingadienine (d18:2/22:0)*	10	100	-3.34111	0.278724
0.0124234	frailty	chemokine (C-C motif) ligand 4	chemokine (c-c motif) ligand 4	chemokine (c-c motif) ligand 4	10	100	3.54109	0.248909	CCL4	ENSG00000129277	ENST00000250151	ENSP00000250151	P13236
0.0124043	Coronary_atherosclerosis_PGS002048	X - 24243	x - 24243	x - 24243	10	100	3.12527	0.405561
0.0128484	Parkinson_disease_PGS000903	hydantoin-5-propionate	hydantoin-5-propionate	hydantoin-5-propionate	10	100	3.08506	0.374552
0.0128995	Direct_bilirubin_umol_L_PGS000681	decorin	decorin	decorin	10	100	-3.22147	0.352222	DCN	ENSG00000011465	ENST00000052754,ENST00000552962,ENST00000420120,ENST00000441303,ENST00000547568,ENST00000456569,ENST00000228329,ENST00000303320,ENST00000393155,ENST00000425043	ENSP00000052754,ENSP00000447654,ENSP00000413723,ENSP00000399815,ENSP00000447674,ENSP00000398514,ENSP00000228329,ENSP00000302031,ENSP00000376862,ENSP00000401021	P07585
0.0121832	frailty	tetradecadienedioate (C14:2-DC)*	tetradecadienedioate*	tetradecadienedioate (c14:2-dc)*	10	100	3.21248	0.440329
0.0112687	LDL_cholesterol_PGS003873	interleukin 5 (colony-stimulating factor, eosinophil)	interleukin 5	IL5	10	100	3.50795	0.253041	IL5	ENSG00000113525	ENST00000231454	ENSP00000231454	P05113
0.0112687	LDL_cholesterol_PGS003873	interleukin 5 (colony-stimulating factor, eosinophil)	interleukin 5	IL5	10	100	3.50795	0.253041	IL5	ENSG00000113525	ENST00000231454	ENSP00000231454	P05113
0.0131497	Type_2_diabetes_SNPs_insulin_action_PGS000850	12,13-DiHOME	12,13-dihome	12,13-dihome	10	100	-3.12741	0.398838
0.0113386	Coronary_atherosclerosis_PGS002048	tumor necrosis factor receptor superfamily, member 10b	tnf receptor superfamily, member 10b	TNFRSF10B	10	100	3.18759	0.362008	TNFRSF10B	ENSG00000120889	ENST00000276431,ENST00000347739	ENSP00000276431,ENSP00000317859	O14763
0.0112907	amyotrophic_lateral_sclerosis	interleukin 13	interleukin 13	interleukin 13	10	100	3.57952	0.243646	IL13	ENSG00000169194	ENST00000304506	ENSP00000304915	P35225
0.012723	Alzheimer_disease_late_onset_PGS000053	3,5-dichloro-2,6-dihydroxybenzoic acid	3,5-dichloro-2,6-dihydroxybenzoic acid	3,5-dichloro-2,6-dihydroxybenzoic acid	10	100	-3.18612	0.364267
0.0130078	LDL_cholesterol_PGS003873	2-hydroxyoctanoate	2-hydroxyoctanoate	2-hydroxyoctanoate	10	100	3.29844	0.317154
0.0115844	Timmers_lifespan	interleukin 10 receptor, alpha	interleukin 10 receptor, alpha	IL10RA	10	100	-3.1047	0.353366	IL10RA	ENSG00000110324	ENST00000227752	ENSP00000227752	Q13651
0.0133416	Coronary_atherosclerosis_PGS002048	chemokine (C-C motif) ligand 11	chemokine (c-c motif) ligand 11	chemokine (c-c motif) ligand 11	10	100	-3.28188	0.32945	CCL11	ENSG00000172156	ENST00000305869	ENSP00000302234	P51671
0.0133416	Coronary_atherosclerosis_PGS002048	chemokine (C-C motif) ligand 11	chemokine (c-c motif) ligand 11	chemokine (c-c motif) ligand 11	10	100	-3.28188	0.32945	CCL11	ENSG00000172156	ENST00000305869	ENSP00000302234	P51671
0.0136409	frailty	cystine	cystine	cystine	10	100	3.44843	0.236666
0.0130968	amyotrophic_lateral_sclerosis	interleukin 17C	interleukin 17c	interleukin 17c	10	100	-3.08632	0.38329	IL17C	ENSG00000124391	ENST00000244241	ENSP00000244241	Q9P0M4
0.013516	Longevity_PGS000906	deoxycarnitine	deoxycarnitine	deoxycarnitine	10	100	3.20895	0.339194
0.0133768	Timmers_lifespan	pregnanediol-3-glucuronide	pregnanediol-3-glucuronide	pregnanediol-3-glucuronide	10	100	-2.99388	0.346512
0.0121313	Type_2_diabetes_SNPs_insulin_action_secretion_PGS000851	X - 18899	x - 18899	x - 18899	10	100	3.37896	0.222652
0.0137225	T2D_cases_vs_HbA1c_filtered_controls_PGS000712	acisoga	acisoga	acisoga	10	100	3.15752	0.280615
0.0137635	Type_2_diabetes_SNPs_insulin_action_secretion_PGS000851	cathepsin L	cathepsin l	cathepsin l	10	100	3.30318	0.270023	CTSL	ENSG00000135047	ENST00000343150,ENST00000340342	ENSP00000345344,ENSP00000365061	P07711
0.0122932	LDL_cholesterol_PGS003873	c-mer proto-oncogene tyrosine kinase	c-mer proto-oncogene tyrosine kinase	c-mer proto-oncogene tyrosine kinase	10	100	3.08934	0.357935	MERTK	ENSG00000153208	ENST00000295408,ENST00000421804	ENSP00000295408,ENSP00000389152	Q12866
0.0134032	LDL_cholesterol_PGS003873	phenol sulfate	phenol sulfate	phenol sulfate	10	100	-3.40636	0.233568
0.0138178	Timmers_lifespan	X - 13431	x - 13431	x - 13431	10	100	3.22102	0.432397
0.012252	Timmers_lifespan	5-methyluridine (ribothymidine)	5-methyluridine (ribothymidine)	5-methyluridine (ribothymidine)	10	100	3.31258	0.265513
0.0125169	Type_2_diabetes_SNPs_insulin_action_secretion_PGS000851	homocitrulline	homocitrulline	homocitrulline	10	100	3.22249	0.316134
0.0138928	Alzheimer_disease_late_onset_PGS000053	tiglylcarnitine (C5:1-DC)	tiglylcarnitine (c5:1-dc)	tiglylcarnitine (c5:1-dc)	10	100	-3.28295	0.286728
0.0124488	Longevity_PGS000906	KIT ligand	kit ligand	kit ligand	10	100	-2.93733	0.351776	KITLG	ENSG00000049130	ENST00000228280,ENST00000347404	ENSP00000228280,ENSP00000054216	P21583
0.0124488	Longevity_PGS000906	KIT ligand	kit ligand	kit ligand	10	100	-2.93733	0.351776	KITLG	ENSG00000049130	ENST00000228280,ENST00000347404	ENSP00000228280,ENSP00000054216	P21583
0.0124488	Longevity_PGS000906	KIT ligand	kit ligand	kit ligand	10	100	-2.93733	0.351776	KITLG	ENSG00000049130	ENST00000228280,ENST00000347404	ENSP00000228280,ENSP00000054216	P21583
0.0137286	mvAge	collagen, type I, alpha 1	collagen, type i, alpha 1	collagen, type i, alpha 1	10	100	3.50274	0.252399	COL1A1	ENSG00000108821	ENST00000225964	ENSP00000225964	P02452
0.0126877	Timmers_healthspan	chymotrypsin C (caldecrin)	chymotrypsin c (caldecrin)	chymotrypsin c (caldecrin)	10	100	-3.10409	0.288034	CTRC	ENSG00000162438	ENST00000375949	ENSP00000365116	Q99895
0.0141709	amyotrophic_lateral_sclerosis	interleukin 5 (colony-stimulating factor, eosinophil)	interleukin 5	IL5	10	100	-3.27153	0.373904	IL5	ENSG00000113525	ENST00000231454	ENSP00000231454	P05113
0.0141709	amyotrophic_lateral_sclerosis	interleukin 5 (colony-stimulating factor, eosinophil)	interleukin 5	IL5	10	100	-3.27153	0.373904	IL5	ENSG00000113525	ENST00000231454	ENSP00000231454	P05113
0.0139174	Heart_failure_PGS001790	hexadecanedioate (C16-DC)	hexadecanedioate (c16-dc)	hexadecanedioate (c16-dc)	10	100	3.19597	0.328266
0.0139711	Type_2_diabetes_SNPs_insulin_action_secretion_PGS000851	3-hydroxybutyrate (BHBA)	3-hydroxybutyrate (bhba)	3-hydroxybutyrate (bhba)	10	100	-2.97787	0.391599
0.0143475	Timmers_longevity	CREATININE ENZ, SER	creatinine enz, ser	creatinine enz, ser	10	100	3.14914	0.30706
0.0144219	Type_2_diabetes_SNPs_insulin_action_PGS000850	X - 17676	x - 17676	x - 17676	10	100	-3.22139	0.295448
0.0147687	HDL_cholesterol_PGS002781	4-hydroxy-2-oxoglutaric acid	4-hydroxy-2-oxoglutaric acid	4-hydroxy-2-oxoglutaric acid	10	100	3.17428	0.285092
0.0151026	amyotrophic_lateral_sclerosis	3-(4-hydroxyphenyl)lactate	3-(4-OHphenyl)lactate	3-(4-hydroxyphenyl)lactate	10	100	3.07181	0.364485
0.0147203	Timmers_longevity	ribonate	ribonate	ribonate	10	100	3.51736	0.125021
0.0150141	LDL_cholesterol_PGS003873	beta-cryptoxanthin	beta-cryptoxanthin	beta-cryptoxanthin	10	100	-3.17923	0.256351
0.014623	Type_2_diabetes_SNPs_insulin_action_secretion_PGS000851	tumor necrosis factor receptor superfamily, member 9	tumor necrosis factor receptor superfamily, member 9	tumor necrosis factor receptor superfamily, member 9	10	100	-3.32442	0.241014	TNFRSF9	ENSG00000049249	ENST00000377507	ENSP00000366729	Q07011
0.015393	Longevity_PGS000906	ribitol	ribitol	ribitol	10	100	2.98175	0.373814
0.0149026	Type_2_diabetes_SNPs_insulin_action_PGS000850	behenoylcarnitine (C22)*	behenoylcarnitine (c22)*	behenoylcarnitine (c22)*	10	100	3.11438	0.30212
0.0156761	T2D_cases_vs_HbA1c_filtered_controls_PGS000712	tumor necrosis factor (ligand) superfamily, member 11	tumor necrosis factor (ligand) superfamily, member 11	TNFSF11	10	100	3.28204	0.237944	TNFSF11	ENSG00000120659	ENST00000358545,ENST00000239849,ENST00000405262,ENST00000398795,ENST00000544862	ENSP00000351347,ENSP00000239849,ENSP00000384042,ENSP00000381775,ENSP00000444913	O14788
0.0156728	Type_2_diabetes_SNPs_insulin_action_PGS000850	1-linoleoyl-2-linolenoyl-GPC (18:2/18:3)*	1-linoleoyl-2-linolenoyl-gpc (18:2/18:3)*	1-linoleoyl-2-linolenoyl-gpc (18:2/18:3)*	10	100	-3.0946	0.336848
0.0157787	Timmers_healthspan	X - 18901	x - 18901	x - 18901	10	100	3.00404	0.333558
0.0154858	Alzheimer_disease_late_onset_PGS000053	histidine	histidine	histidine	10	100	3.13405	0.377493
0.0157124	Coronary_artery_disease_PGS004941	glycine	glycine	glycine	10	100	-3.14716	0.239418
0.015853	amyotrophic_lateral_sclerosis	trimethylamine N-oxide	trimethylamine n-oxide	trimethylamine n-oxide	10	100	3.02009	0.337197
0.016063	Timmers_lifespan	serpin peptidase inhibitor, clade A (alpha-1 antiproteinase, antitrypsin), member 12	serpin peptidase inhibitor, clade a, member 12	SERPINA12	10	100	-3.17928	0.315701	SERPINA12	ENSG00000165953	ENST00000556881,ENST00000341228	ENSP00000451738,ENSP00000342109	Q8IW75
0.0158451	Longevity_PGS000906	5alpha-pregnan-3beta,20beta-diol monosulfate (1)	5alpha-preg-3b,20a-diol MS(1)	5Œ±-Preg-MS	10	100	-3.10752	0.309686
0.0155122	Type_2_diabetes_SNPs_insulin_action_PGS000850	interleukin 6 receptor	interleukin 6 receptor	interleukin 6 receptor	10	100	3.18371	0.293607	IL6R	ENSG00000160712	ENST00000368485,ENST00000344086	ENSP00000357470,ENSP00000340589	P08887
0.0145276	Type_2_diabetes_SNPs_insulin_action_PGS000850	X - 21736	x - 21736	x - 21736	10	100	-3.23017	0.296653
0.0146696	Timmers_longevity	3-hydroxy-3-methylglutarate	3-hydroxy-3-methylglutarate	3-hydroxy-3-methylglutarate	10	100	2.97827	0.294619
0.0148341	frailty	4-methylcatechol sulfate	4-methylcatechol sulfate	4-methylcatechol sulfate	10	100	3.38533	0.147094
0.0161857	Timmers_longevity	chymotrypsin C (caldecrin)	chymotrypsin c (caldecrin)	chymotrypsin c (caldecrin)	10	100	2.9945	0.370274	CTRC	ENSG00000162438	ENST00000375949	ENSP00000365116	Q99895
0.0159086	LDL_cholesterol_PGS003873	tumor necrosis factor receptor superfamily, member 11b	tumor necrosis factor receptor superfamily, member 11b	TNFRSF11B	10	100	3.13505	0.227379	TNFRSF11B	ENSG00000164761	ENST00000297350	ENSP00000297350	O00300
0.0159086	LDL_cholesterol_PGS003873	tumor necrosis factor receptor superfamily, member 11b	tumor necrosis factor receptor superfamily, member 11b	TNFRSF11B	10	100	3.13505	0.227379	TNFRSF11B	ENSG00000164761	ENST00000297350	ENSP00000297350	O00300
0.0164952	Type_2_diabetes_SNPs_insulin_action_PGS000850	paraoxonase 3	paraoxonase 3	paraoxonase 3	10	100	-2.86721	0.324041	PON3	ENSG00000105852	ENST00000265627	ENSP00000265627	Q15166
0.0171064	HDL_cholesterol_PGS002781	cyclo(pro-val)	cyclo(pro-val)	cyclo(pro-val)	10	100	-2.94608	0.382852
0.0171199	Alzheimers_PGS002753	X - 21441	x - 21441	x - 21441	10	100	3.07587	0.331375
0.0172915	Cardiovascular_disease_PGS002316	deoxycholic acid glucuronide	deoxycholicacidglucuronide	deoxycholic acid glucuronide	10	100	-3.19663	0.239785
0.017199	Type_2_diabetes_SNPs_insulin_action_secretion_PGS000851	bone morphogenetic protein 6	bone morphogenetic protein 6	bone morphogenetic protein 6	10	100	3.0359	0.331624	BMP6	ENSG00000153162	ENST00000283147	ENSP00000283147	P22004
0.0175566	Alzheimers_PGS002753	1-stearoyl-2-oleoyl-GPE (18:0/18:1)	1-stearoyl-2-oleoyl-gpe (18:0/18:1)	1-stearoyl-2-oleoyl-gpe (18:0/18:1)	10	100	3.03344	0.282275
0.0174248	Type_2_diabetes_SNPs_insulin_action_PGS000850	iduronidase, alpha-L-	iduronidase, alpha-l-	iduronidase, alpha-l-	10	100	3.14754	0.299799	IDUA	ENSG00000127415	ENST00000247933	ENSP00000247933	P35475
0.0176012	Longevity_PGS000906	taurocholenate sulfate*	taurocholenate sulfate*	taurocholenate sulfate*	10	100	-3.05264	0.368618
0.0178359	frailty	protease, serine 27	protease, serine 27	protease, serine 27	10	100	3.15639	0.2923	PRSS27	ENSG00000172382	ENST00000302641	ENSP00000306390	Q9BQR3
0.0158388	LDL_cholesterol_PGS003873	palmitoyl dihydrosphingomyelin (d18:0/16:0)*	palmitoyl dihydrosphingomyelin (d18:0/16:0)*	SM(d18:0/16:0)	10	100	3.15807	0.29125
0.0180266	Timmers_healthspan	S-methylcysteine sulfoxide	s-methylcysteine sulfoxide	s-methylcysteine sulfoxide	10	100	3.05468	0.263026
0.0179392	HDL_cholesterol_PGS002781	pyroglutamine*	pyroglutamine*	pyroglutamine*	10	100	3.13444	0.250098
0.0175337	LDL_cholesterol_PGS003873	9,10-DiHOME	9,10-dihome	9,10-dihome	10	100	-3.10769	0.331023
0.0184837	Parkinson_disease_PGS000903	tumor necrosis factor	tumor necrosis factor	tumor necrosis factor	10	100	-3.12239	0.259464	TNF	ENSG00000204490,ENSG00000228849,ENSG00000206439,ENSG00000228321,ENSG00000230108,ENSG00000223952,ENSG00000232810	ENST00000376122,ENST00000420425,ENST00000383496,ENST00000412275,ENST00000443707,ENST00000448781,ENST00000449264	ENSP00000365290,ENSP00000410668,ENSP00000372988,ENSP00000392858,ENSP00000389492,ENSP00000389490,ENSP00000398698	P01375
0.0184262	Coronary_atherosclerosis_PGS002048	matrix metallopeptidase 1 (interstitial collagenase)	interstitial collagenase	matrix metallopeptidase 1 (interstitial collagenase)	10	100	-2.91467	0.340315	MMP1	ENSG00000196611	ENST00000315274	ENSP00000322788	P03956
0.016954	Type_2_diabetes_SNPs_insulin_action_secretion_PGS000851	3-methylglutarylcarnitine (2)	3-methylglutarylcarnitine (2)	3-methylglutarylcarnitine (2)	10	100	-2.8429	0.348028
0.0185885	Heart_failure_PGS001790	CARBON DIOXIDE (CO2)	carbon dioxide (co2)	carbon dioxide (co2)	10	100	3.02241	0.304385
0.0186322	Coronary_atherosclerosis_PGS002048	phosphate	phosphate	phosphate	10	100	3.21561	0.166386
0.0191515	Type_2_diabetes_SNPs_insulin_action_PGS000850	N-acetylglycine	n-acetylglycine	n-acetylglycine	10	100	-3.10078	0.280505
0.0173017	Parkinson_disease_PGS000903	interleukin 12B	interleukin 12b	interleukin 12b	10	100	2.9602	0.255325
0.019069	mvAge	chemokine (C-C motif) ligand 4	chemokine (c-c motif) ligand 4	chemokine (c-c motif) ligand 4	10	100	-3.06283	0.231138	CCL4	ENSG00000129277	ENST00000250151	ENSP00000250151	P13236
0.0193561	Type_2_diabetes_SNPs_insulin_action_PGS000850	N-acetylglutamine	n-acetylglutamine	n-acetylglutamine	10	100	-2.93581	0.282152
0.0181493	frailty	vanillactate	vanillactate	vanillactate	10	100	2.83047	0.246116
0.0195822	Coronary_artery_disease_PGS004941	picolinate	picolinate	picolinate	10	100	3.09549	0.257726
0.0196241	T2D_cases_vs_HbA1c_filtered_controls_PGS000712	homoarginine	homoarginine	homoarginine	10	100	3.02778	0.300194
0.0195722	Type_2_diabetes_SNPs_insulin_action_PGS000850	1-(1-enyl-palmitoyl)-2-myristoyl-GPC (P-16:0/14:0)*	1-(1-enyl-palm)-2-myr-gpc(p-16:0/14:0)*	1-(1-enyl-palmitoyl)-2-myristoyl-gpc (p-16:0/14:0)*	10	100	3.13283	0.156831
0.0196369	Timmers_longevity	X - 21471	x - 21471	x - 21471	10	100	3.06694	0.265077
0.0196584	Longevity_PGS000906	betaine	betaine	betaine	10	100	3.03084	0.267023
0.0181746	Longevity_PGS000906	1-palmitoyl-2-linoleoyl-GPC (16:0/18:2)	1-palmitoyl-2-linoleoyl-gpc (16:0/18:2)	1-palmitoyl-2-linoleoyl-gpc (16:0/18:2)	10	100	2.90819	0.231445
0.020304	Parkinson_disease_PGS000903	2-ketocaprylate	2-ketocaprylate	2-ketocaprylate	10	100	-2.70283	0.259689
0.0184565	amyotrophic_lateral_sclerosis	myeloperoxidase	myeloperoxidase	myeloperoxidase	10	100	2.90288	0.336558	MPO	ENSG00000005381	ENST00000225275,ENST00000340482	ENSP00000225275,ENSP00000344419	P05164
0.020406	Timmers_longevity	X - 12007	x - 12007	x - 12007	10	100	-3.02927	0.22852
0.0202757	Longevity_PGS000906	methyl-4-hydroxybenzoate sulfate	methyl-4-hydroxybenzoate sulfate	methyl-4-hydroxybenzoate sulfate	10	100	-3.0986	0.247385
0.0205531	Coronary_artery_disease_PGS004941	gamma-glutamylglycine	gamma-glutamylglycine	gamma-glutamylglycine	10	100	-2.89332	0.203464
0.0209567	HDL_cholesterol_PGS002781	plasminogen activator, urokinase receptor	plasminogen activator, urokinase receptor	plasminogen activator, urokinase receptor	10	100	2.89252	0.178431	PLAUR	ENSG00000011422	ENST00000339082,ENST00000340093,ENST00000221264	ENSP00000342049,ENSP00000339328,ENSP00000221264	Q03405
0.0209957	Longevity_PGS000906	X - 16397	x - 16397	x - 16397	10	100	-2.92458	0.295725
0.0207602	Direct_bilirubin_umol_L_PGS000681	X - 11441	x - 11441	x - 11441	10	100	2.99794	0.200062
0.0194162	Alzheimers_PGS002753	cystine	cystine	cystine	10	100	-3.04548	0.179282
0.0210279	amyotrophic_lateral_sclerosis	carotene diol (2)	carotene diol (2)	carotene diol (2)	10	100	-3.05966	0.251581
0.0214762	Timmers_longevity	1-methyl-4-imidazoleacetate	1-methyl-4-imidazoleacetate	1-methyl-4-imidazoleacetate	10	100	-2.9256	0.297419
0.0196605	Longevity_PGS000906	4-chlorobenzoic acid	4-chlorobenzoic acid	4-chlorobenzoic acid	10	100	-2.94318	0.227298
0.0211347	Type_2_diabetes_SNPs_insulin_action_PGS000850	alpha-1-microglobulin/bikunin precursor	alpha-1-microglobulin/bikunin precursor	bikunin precusor	10	100	-3.00095	0.230988	AMBP	ENSG00000106927	ENST00000265132	ENSP00000265132	P02760
0.0194751	Timmers_healthspan	artemin	artemin	artemin	10	100	2.79357	0.223166	ARTN	ENSG00000117407	ENST00000372359,ENST00000498139,ENST00000372354,ENST00000438616,ENST00000414809	ENSP00000361434,ENSP00000436727,ENSP00000361429,ENSP00000391998,ENSP00000387435	Q5T4W7
0.0215136	Type_2_diabetes_SNPs_insulin_action_secretion_PGS000851	N-terminal prohormone brain natriuretic peptide	n-terminal prohorm brain natriuretic pep	n-terminal prohormone brain natriuretic peptide	10	100	-3.00956	0.273956	NT-proBNP				NT-proBNP
0.0215136	Type_2_diabetes_SNPs_insulin_action_secretion_PGS000851	N-terminal prohormone brain natriuretic peptide	n-terminal prohorm brain natriuretic pep	n-terminal prohormone brain natriuretic peptide	10	100	-3.00956	0.273956	NT-proBNP				NT-proBNP
0.0219633	mvAge	salicylate	salicylate	salicylate	10	100	-2.81775	0.29382
0.0201468	Coronary_artery_disease_PGS004941	N-acetylcarnosine	n-acetylcarnosine	n-acetylcarnosine	10	100	-2.84457	0.295753
0.0216908	frailty	glycerophosphorylcholine (GPC)	glycerophosphorylcholine	glycerophosphorylcholine (gpc)	10	100	-2.99517	0.230018
0.0219263	frailty	interleukin 17 receptor A	interleukin 17 receptor a	interleukin 17 receptor a	10	100	-3.10315	0.138482	IL17RA	ENSG00000177663	ENST00000319363	ENSP00000320936	Q96F46
0.0220545	Alzheimers_PGS002753	1-oleoyl-2-linoleoyl-GPE (18:1/18:2)*	1-oleoyl-2-linoleoyl-gpe (18:1/18:2)*	1-oleoyl-2-linoleoyl-gpe (18:1/18:2)*	10	100	2.81143	0.222625
0.0203916	Timmers_lifespan	interleukin 20	interleukin 20	IL20	10	100	3.07558	0.182129	IL20	ENSG00000162891	ENST00000367098,ENST00000367096	ENSP00000356065,ENSP00000356063	Q9NYY1
0.0202569	T2D_cases_vs_HbA1c_filtered_controls_PGS000712	leukemia inhibitory factor	leukemia inhibitory factor	leukemia inhibitory factor	10	100	-2.8998	0.215774	LIF	ENSG00000128342	ENST00000249075,ENST00000403987	ENSP00000249075,ENSP00000384450	P15018
0.022113	Timmers_longevity	CD163 molecule	cd163 molecule	cd163 molecule	10	100	-3.01967	0.194027	CD163	ENSG00000177575	ENST00000359156,ENST00000432237	ENSP00000352071,ENSP00000403885	Q86VB7
0.0220052	Timmers_healthspan	ALBUMIN	albumin	albumin	10	100	-2.85502	0.301244
0.0206161	Type_2_diabetes_SNPs_insulin_action_secretion_PGS000851	X - 23587	x - 23587	x - 23587	10	100	2.77072	0.246851
0.0224679	frailty	dihomo-linolenoylcarnitine (C20:3n3 or 6)*	dihomo-linolenoylcarnitine (c20:3n3 or 6)*	dihomo-linolenoylcarnitine (c20:3n3 or 6)*	10	100	2.8122	0.275354
0.022487	Alzheimers_PGS002753	pregnenetriol disulfate*	pregnenetriol disulfate*	pregnenetriol disulfate*	10	100	2.88047	0.199879
0.0209304	Alzheimer_disease_late_onset_PGS000053	stachydrine	stachydrine	stachydrine	10	100	2.95458	0.202175
0.0227903	Parkinson_disease_PGS000903	2-stearoyl-GPE (18:0)*	2-stearoyl-gpe (18:0)*	2-stearoyl-gpe (18:0)*	10	100	-2.8776	0.253672
0.0229122	HDL_cholesterol_PGS002781	propionylglycine	propionylglycine	propionylglycine	10	100	-2.95792	0.208767
0.0214735	Cardiovascular_disease_PGS002316	interleukin 22 receptor, alpha 1	interleukin 22RA1	interleukin 22 receptor, alpha 1	10	100	2.85228	0.252995	IL22RA1	ENSG00000142677	ENST00000270800	ENSP00000270800	Q8N6P7
0.02321	Heart_failure_PGS001790	hexadecenedioate (C16:1-DC)*	hexadecenedioate (c16:1-dc)*	hexadecenedioate (c16:1-dc)*	10	100	3.01295	0.23143
0.023491	amyotrophic_lateral_sclerosis	1-(1-enyl-stearoyl)-2-arachidonoyl-GPE (P-18:0/20:4)*	1(1-enyl-stearoyl)-2-arachid-gpe(p-18:0/20:4)*	1-(1-enyl-stearoyl)-2-arachidonoyl-gpe (p-18:0/20:4)*	10	100	3.0079	0.15078
0.0233755	mvAge	methyl-4-hydroxybenzoate sulfate	methyl-4-hydroxybenzoate sulfate	methyl-4-hydroxybenzoate sulfate	10	100	-2.8756	0.172426
0.0225721	Timmers_lifespan	3-methoxytyrosine	3-methoxytyrosine	3-methoxytyrosine	10	100	2.78498	0.192021
0.0221808	Parkinson_disease_PGS000903	X - 16570	x - 16570	x - 16570	10	100	-2.91801	0.201286
0.0244062	Alzheimer_disease_late_onset_PGS000053	malate	malate	malate	10	100	2.9211	0.192665
0.023958	frailty	2-hydroxystearate	2-hydroxystearate	2-hydroxystearate	10	100	2.77158	0.195193
0.0248379	frailty	X - 24544	x - 24544	x - 24544	10	100	-2.78791	0.208804
0.0250651	frailty	lithocholate sulfate (1)	lithocholate sulfate (1)	lithocholate sulfate (1)	10	100	2.81467	0.186499
0.0255104	Longevity_PGS000906	3-aminoisobutyrate	3-aminoisobutyrate	3-aminoisobutyrate	10	100	2.79165	0.269532
0.0252719	Timmers_longevity	TIMP metallopeptidase inhibitor 4	timp metallopeptidase inhibitor 4	timp metallopeptidase inhibitor 4	10	100	2.8184	0.179877	TIMP4	ENSG00000157150	ENST00000287814	ENSP00000287814	Q99727
0.0252783	LDL_cholesterol_PGS003873	plasminogen activator, urokinase receptor	plasminogen activator, urokinase receptor	plasminogen activator, urokinase receptor	10	100	-2.93347	0.158129	PLAUR	ENSG00000011422	ENST00000339082,ENST00000340093,ENST00000221264	ENSP00000342049,ENSP00000339328,ENSP00000221264	Q03405
0.026157	Timmers_lifespan	X - 23587	x - 23587	x - 23587	10	100	2.84726	0.196219
0.0256641	T2D_cases_vs_HbA1c_filtered_controls_PGS000712	threonine	threonine	threonine	10	100	2.88808	0.237015
0.0260735	Type_2_diabetes_SNPs_insulin_action_PGS000850	linolenoylcarnitine (C18:3)*	linolenoylcarnitine (c18:3)*	linolenoylcarnitine (c18:3)*	10	100	-2.78281	0.2382
0.0269809	Coronary_artery_disease_PGS004941	gastric intrinsic factor (vitamin B synthesis)	gastric intrinsic factor	GIF	10	100	-2.68601	0.165213	GIF	ENSG00000134812	ENST00000257248,ENST00000541311	ENSP00000257248,ENSP00000440427	P27352
0.026825	Timmers_healthspan	proline/arginine-rich end leucine-rich repeat protein	proline/arginine-rich end leucine-rich repeat protein	PRELP	10	100	-2.83029	0.180752	PRELP	ENSG00000188783	ENST00000343110	ENSP00000343924	P51888
0.0254769	Alzheimer_disease_late_onset_PGS000053	fumarate	fumarate	fumarate	10	100	2.85155	0.188171
0.0281166	mvAge	glyoxalase I	glyoxalase i	glyoxalase i	10	100	2.6876	0.170926	GLO1	ENSG00000124767	ENST00000373365	ENSP00000362463	Q04760
0.0271006	Timmers_lifespan	collagen, type I, alpha 1	collagen, type i, alpha 1	collagen, type i, alpha 1	10	100	2.77921	0.150288	COL1A1	ENSG00000108821	ENST00000225964	ENSP00000225964	P02452
0.0293273	Longevity_PGS000906	5alpha-pregnan-3beta,20alpha-diol monosulfate (2)	5alpha-preg-3b,20a-diol MS(2)	5Œ±-Preg-MS2	10	100	-2.68284	0.151119
0.0303627	Alzheimers_PGS002753	5-hydroxylysine	5-hydroxylysine	5-hydroxylysine	10	100	2.78667	0.145623
0.0317558	Alzheimer_disease_late_onset_PGS000053	sphingomyelin (d18:2/24:2)*	sphingomyelin (d18:2/24:2)*	sphingomyelin (d18:2/24:2)*	10	100	2.65039	0.133885
0.0319794	Timmers_longevity	adenosine	adenosine	adenosine	10	100	-2.70319	0.134994
0.0329026	T2D_cases_vs_HbA1c_filtered_controls_PGS000712	vascular endothelial growth factor A	vegfa	vascular endothelial growth factor a	10	100	2.71131	0.139729	VEGFA	ENSG00000112715	ENST00000372077,ENST00000520948,ENST00000523873,ENST00000523950,ENST00000457104,ENST00000518689,ENST00000523125,ENST00000518824	ENSP00000361148,ENSP00000428321,ENSP00000430479,ENSP00000429643,ENSP00000409911,ENSP00000430829,ENSP00000429008,ENSP00000430002	P15692
0.0329026	T2D_cases_vs_HbA1c_filtered_controls_PGS000712	vascular endothelial growth factor A	vegfa	vascular endothelial growth factor a	10	100	2.71131	0.139729	VEGFA	ENSG00000112715	ENST00000372077,ENST00000520948,ENST00000523873,ENST00000523950,ENST00000457104,ENST00000518689,ENST00000523125,ENST00000518824	ENSP00000361148,ENSP00000428321,ENSP00000430479,ENSP00000429643,ENSP00000409911,ENSP00000430829,ENSP00000429008,ENSP00000430002	P15692
0.00179474	frailty	INSULIN	insulin	insulin	9	90	3.3894	1.04861
0.0021472	LDL_cholesterol_PGS003873	CHOLESTEROL, TOTAL	cholesterol, total	cholesterol, total	9	90	4.60154	0.909617
0.00298085	Parkinson_disease_PGS000903	surfactant protein D	surfactant protein d	surfactant protein d	9	90	-3.75219	0.804113	SFTPD	ENSG00000133661	ENST00000372292	ENSP00000361366	P35247
0.00316947	HDL_cholesterol_PGS002781	cystatin B (stefin B)	cystatin b (stefin b)	cystatin b (stefin b)	9	90	4.08428	0.699475	CSTB	ENSG00000160213	ENST00000291568	ENSP00000291568	P04080
0.00573352	LDL_cholesterol_PGS003873	LPIR_SCORE	lpir_score	lpir_score	9	90	-0.476698	3.49519
0.00648009	frailty	5alpha-androstan-3beta,17beta-diol disulfate	5alpha-androstan-3beta,17beta-diol disulfate	5a-Androstan-3b17b-DS	9	90	3.66451	0.626451
0.00690266	Timmers_healthspan	X - 11299	x - 11299	x - 11299	9	90	3.36748	0.482453
0.00807184	Alzheimer_disease_late_onset_PGS000053	5alpha-pregnan-3beta,20alpha-diol monosulfate (2)	5alpha-preg-3b,20a-diol MS(2)	5Œ±-Preg-MS2	9	90	-3.53762	0.506757
0.00759713	Timmers_healthspan	stachydrine	stachydrine	stachydrine	9	90	3.55069	0.513966
0.00849052	Alzheimers_PGS002753	9-hydroxystearate	9-hydroxystearate	9-hydroxystearate	9	90	3.26867	0.577554
0.00893467	Alzheimer_disease_late_onset_PGS000053	5-hydroxylysine	5-hydroxylysine	5-hydroxylysine	9	90	-3.54337	0.51472
0.00920796	Longevity_PGS000906	vanillactate	vanillactate	vanillactate	9	90	3.4558	0.368186
0.0105563	Timmers_longevity	4-ethylphenylsulfate	4-et-phenylsulfate	4-ethylphenylsulfate	9	90	3.16681	0.486737
0.0111961	frailty	carboxyethyl-GABA	carboxyethyl-gaba	carboxyethyl-gaba	9	90	-3.48828	0.465971
0.0116484	Parkinson_disease_PGS000903	6-oxopiperidine-2-carboxylate	6-oxopiperidine-2-carboxylate	6-oxopiperidine-2-carboxylate	9	90	3.30152	0.457661
0.0111392	HDL_cholesterol_PGS002781	3-methylxanthine	3-methylxanthine	3-methylxanthine	9	90	-3.42378	0.4442
0.0101539	HDL_cholesterol_PGS002781	3-hydroxypyridine sulfate	3-hydroxypyridine sulfate	3-hydroxypyridine sulfate	9	90	-3.33346	0.36651
0.0107794	Parkinson_disease_PGS000903	taurocholenate sulfate*	taurocholenate sulfate*	taurocholenate sulfate*	9	90	3.28402	0.345881
0.012413	Parkinson_disease_PGS000903	chemokine (C-C motif) ligand 16	chemokine (c-c motif) ligand 16	chemokine (c-c motif) ligand 16	9	90	3.09074	0.389285	CCL16	ENSG00000161573	ENST00000293275	ENSP00000293275	O15467
0.0128698	Parkinson_disease_PGS000903	2-aminooctanoate	2-aminooctanoate	2-aminooctanoate	9	90	-2.86693	0.371678
0.0129947	Alzheimer_disease_late_onset_PGS000053	methyl-4-hydroxybenzoate sulfate	methyl-4-hydroxybenzoate sulfate	methyl-4-hydroxybenzoate sulfate	9	90	-3.33343	0.376529
0.013952	Alzheimers_PGS002753	tumor necrosis factor	tumor necrosis factor	tumor necrosis factor	9	90	-3.12151	0.420625	TNF	ENSG00000204490,ENSG00000228849,ENSG00000206439,ENSG00000228321,ENSG00000230108,ENSG00000223952,ENSG00000232810	ENST00000376122,ENST00000420425,ENST00000383496,ENST00000412275,ENST00000443707,ENST00000448781,ENST00000449264	ENSP00000365290,ENSP00000410668,ENSP00000372988,ENSP00000392858,ENSP00000389492,ENSP00000389490,ENSP00000398698	P01375
0.0140397	Coronary_atherosclerosis_PGS002048	1,5-anhydroglucitol (1,5-AG)	1,5-anhydroglucitol (1,5-ag)	1,5-anhydroglucitol (1,5-ag)	9	90	3.36992	0.39097
0.0142681	mvAge	5alpha-pregnan-3beta,20alpha-diol monosulfate (2)	5alpha-preg-3b,20a-diol MS(2)	5Œ±-Preg-MS2	9	90	-3.16839	0.34666
0.0141417	Timmers_healthspan	2-hydroxyhippurate (salicylurate)	2-hydroxyhippurate	2-hydroxyhippurate (salicylurate)	9	90	-3.25551	0.263073
0.0130623	Longevity_PGS000906	LDL PARTICLE NUMBER	ldl particle number	ldl particle number	9	90	2.94014	0.48632
0.0147839	HDL_cholesterol_PGS002781	X - 12007	x - 12007	x - 12007	9	90	-3.04319	0.420927
0.0142116	Cardiovascular_disease_PGS002316	agouti related protein homolog (mouse)	agouti-rel protein hom(mouse)	agouti related protein homolog (mouse)	9	90	3.31516	0.367995	AGRP	ENSG00000159723	ENST00000290953	ENSP00000290953	O00253
0.0150957	Type_2_diabetes_SNPs_insulin_action_secretion_PGS000851	N,N-dimethylalanine	n,n-dimethylalanine	n,n-dimethylalanine	9	90	3.26907	0.337142
0.0154681	Alzheimer_disease_late_onset_PGS000053	interleukin 5 (colony-stimulating factor, eosinophil)	interleukin 5	IL5	9	90	3.14813	0.365608	IL5	ENSG00000113525	ENST00000231454	ENSP00000231454	P05113
0.0154681	Alzheimer_disease_late_onset_PGS000053	interleukin 5 (colony-stimulating factor, eosinophil)	interleukin 5	IL5	9	90	3.14813	0.365608	IL5	ENSG00000113525	ENST00000231454	ENSP00000231454	P05113
0.0163478	Type_2_diabetes_SNPs_insulin_action_secretion_PGS000851	interleukin 17C	interleukin 17c	interleukin 17c	9	90	2.95183	0.356811	IL17C	ENSG00000124391	ENST00000244241	ENSP00000244241	Q9P0M4
0.0163974	HDL_cholesterol_PGS002781	interleukin 10 receptor, alpha	interleukin 10 receptor, alpha	IL10RA	9	90	-3.24761	0.384026	IL10RA	ENSG00000110324	ENST00000227752	ENSP00000227752	Q13651
0.0163115	Alzheimer_disease_late_onset_PGS000053	carbonic anhydrase VA, mitochondrial	carbonic anhydrase va, mitochondrial	carbonic anhydrase va, mitochondrial	9	90	3.13488	0.390103	CA5A	ENSG00000174990	ENST00000309893	ENSP00000309649	P35218
0.0164269	LDL_cholesterol_PGS003873	2-aminooctanoate	2-aminooctanoate	2-aminooctanoate	9	90	3.25573	0.30928
0.0163025	Longevity_PGS000906	S100 calcium binding protein A12	s100 calcium binding protein a12	s100 calcium binding protein a12	9	90	3.03623	0.36887	S100A12	ENSG00000163221	ENST00000368737	ENSP00000357726	P80511
0.0170251	Alzheimer_disease_late_onset_PGS000053	11beta-hydroxyandrosterone glucuronide	11beta-hydroxyandrosterone glucuronide	11beta-hydroxyandrosterone glucuronide	9	90	3.28067	0.243666
0.017245	Timmers_longevity	fibroblast growth factor 5	fibroblast growth factor 5	fibroblast growth factor 5	9	90	2.93284	0.359148	FGF5	ENSG00000138675	ENST00000456523,ENST00000312465	ENSP00000398353,ENSP00000311697	Q8NF90
0.0157031	Direct_bilirubin_umol_L_PGS000681	thyroxine	thyroxine	thyroxine	9	90	-2.87262	0.341914
0.0176433	Timmers_longevity	glycocholate	glycocholate	glycocholate	9	90	2.98206	0.27176
0.0176167	Timmers_lifespan	theobromine	theobromine	theobromine	9	90	-2.89075	0.302651
0.017834	Longevity_PGS000906	DPA	dpa	dpa	9	90	3.16262	0.370423
0.0183375	frailty	X - 24556	x - 24556	x - 24556	9	90	3.04583	0.30165
0.0182996	Alzheimer_disease_late_onset_PGS000053	pregnanediol-3-glucuronide	pregnanediol-3-glucuronide	pregnanediol-3-glucuronide	9	90	-2.85788	0.301638
0.0184628	Type_2_diabetes_SNPs_insulin_action_secretion_PGS000851	interleukin 17A	interleukin 17a	IL17A	9	90	3.03192	0.343043	IL17A	ENSG00000112115	ENST00000340057	ENSP00000344192	Q16552
0.0180534	Type_2_diabetes_SNPs_insulin_action_PGS000850	v-src avian sarcoma (Schmidt-Ruppin A-2) viral oncogene homolog	v-src avian sarcoma viral oncogene homolog	SRC	9	90	-3.08121	0.3531	SRC	ENSG00000197122	ENST00000373578,ENST00000373567,ENST00000373558,ENST00000445403,ENST00000360723,ENST00000358208	ENSP00000362680,ENSP00000362668,ENSP00000362659,ENSP00000408503,ENSP00000353950,ENSP00000350941	P12931
0.0188942	Heart_failure_PGS001790	N-acetylglycine	n-acetylglycine	n-acetylglycine	9	90	3.03391	0.35026
0.0172154	Parkinson_disease_PGS000903	1-palmitoleoyl-2-linolenoyl-GPC (16:1/18:3)*	1-palm-2-lino-gpc(16:1/18:3)*	1-palmitoleoyl-2-linolenoyl-gpc (16:1/18:3)*	9	90	2.92183	0.30636
0.0184271	T2D_cases_vs_HbA1c_filtered_controls_PGS000712	interleukin 33	interleukin 33	interleukin 33	9	90	-3.05001	0.362983	IL33	ENSG00000137033	ENST00000381434,ENST00000417746,ENST00000456383	ENSP00000370842,ENSP00000394039,ENSP00000414238	O95760
0.0190563	Alzheimers_PGS002753	3-amino-2-piperidone	3-amino-2-piperidone	3-amino-2-piperidone	9	90	2.75911	0.331017
0.0192381	Alzheimer_disease_late_onset_PGS000053	4-hydroxychlorothalonil	4-hydroxychlorothalonil	4-hydroxychlorothalonil	9	90	-3.15147	0.215065
0.0174727	LDL_cholesterol_PGS003873	tissue factor pathway inhibitor (lipoprotein-associated coagulation inhibitor)	tissue factor pathway inhibitor (lipoprotein-associated coagulation inhibitor)	TFPI	9	90	2.8179	0.308546	TFPI	ENSG00000003436	ENST00000392365,ENST00000409676,ENST00000339091,ENST00000233156	ENSP00000376172,ENSP00000386344,ENSP00000342306,ENSP00000233156	P10646
0.019382	Coronary_atherosclerosis_PGS002048	CREATININE ENZ, SER	creatinine enz, ser	creatinine enz, ser	9	90	3.06958	0.289754
0.019298	T2D_cases_vs_HbA1c_filtered_controls_PGS000712	butyrylcarnitine (C4)	butyrylcarnitine (c4)	butyrylcarnitine (c4)	9	90	2.8054	0.289141
0.0194074	Timmers_lifespan	interleukin 24	interleukin 24	IL24	9	90	2.97369	0.294377	IL24	ENSG00000162892	ENST00000391929,ENST00000294984,ENST00000367093	ENSP00000375795,ENSP00000294984,ENSP00000356060	Q13007
0.0183766	Type_2_diabetes_SNPs_insulin_action_PGS000850	pyridoxate	pyridoxate	pyridoxate	9	90	2.94646	0.307793
0.0197382	Coronary_vascular_disease_CVD_PGS004514	erythritol	erythritol	erythritol	9	90	2.73372	0.380004
0.01976	amyotrophic_lateral_sclerosis	4-ethylphenylsulfate	4-et-phenylsulfate	4-ethylphenylsulfate	9	90	-3.1312	0.183181
0.0199903	Type_2_diabetes_SNPs_insulin_action_PGS000850	2-hydroxydecanoate	2-hydroxydecanoate	2-hydroxydecanoate	9	90	-2.92468	0.343844
0.0183953	Coronary_atherosclerosis_PGS002048	interleukin 10	interleukin 10	interleukin 10	9	90	2.84671	0.241811	IL10	ENSG00000136634	ENST00000423557	ENSP00000412237	P22301
0.0183953	Coronary_atherosclerosis_PGS002048	interleukin 10	interleukin 10	interleukin 10	9	90	2.84671	0.241811	IL10	ENSG00000136634	ENST00000423557	ENSP00000412237	P22301
0.0207413	Timmers_lifespan	thioproline	thioproline	thioproline	9	90	2.90976	0.33664
0.0209455	Timmers_longevity	3-hydroxyhexanoate	3-hydroxyhexanoate	3-hydroxyhexanoate	9	90	-2.87513	0.254849
0.0196402	Timmers_longevity	matrix metallopeptidase 12 (macrophage elastase)	matrix metallopeptidase 12 (macrophage elastase)	matrix metallopeptidase 12 (macrophage elastase)	9	90	-2.78078	0.271762	MMP12	ENSG00000262406	ENST00000571244	ENSP00000458585	P39900
0.0216308	Timmers_longevity	S-1-pyrroline-5-carboxylate	s-1-pyrroline-5-carboxylate	s-1-pyrroline-5-carboxylate	9	90	2.87883	0.237078
0.0213323	Coronary_atherosclerosis_PGS002048	N-methylproline	n-methylproline	n-methylproline	9	90	-3.03457	0.227362
0.0218048	LDL_cholesterol_PGS003873	interleukin 10 receptor, alpha	interleukin 10 receptor, alpha	IL10RA	9	90	-2.82384	0.338275	IL10RA	ENSG00000110324	ENST00000227752	ENSP00000227752	Q13651
0.0214935	LDL_cholesterol_PGS003873	interleukin 27;Epstein-Barr virus induced 3	interleukin 27;epstein-barr virus induced 3	IL27_EBI3	9	90	2.94921	0.173568	IL27,EBI3	ENSG00000197272,ENSG00000105246	ENST00000356897,ENST00000221847	ENSP00000349365,ENSP00000221847	Q8NEV9,Q14213
0.0223504	Heart_failure_PGS001790	cholate	cholate	cholate	9	90	2.89195	0.336311
0.0222115	Direct_bilirubin_umol_L_PGS000681	X - 21796	x - 21796	x - 21796	9	90	3.04313	0.233357
0.0220863	HDL_cholesterol_PGS002781	4-methylcatechol sulfate	4-methylcatechol sulfate	4-methylcatechol sulfate	9	90	2.70467	0.256245
0.0222262	amyotrophic_lateral_sclerosis	1-(1-enyl-stearoyl)-2-arachidonoyl-GPC (P-18:0/20:4)	1(1-enyl-stearoyl)-2-arachid-gpc (p-18:0/20:4)	GPC(18:0/20:4)	9	90	2.86672	0.266328
0.022282	HDL_cholesterol_PGS002781	imidazole propionate	imidazole propionate	imidazole propionate	9	90	2.9599	0.234701
0.022477	Coronary_vascular_disease_CVD_PGS004514	5alpha-androstan-3alpha,17beta-diol monosulfate (1)	5alpha-androstan-3alpha,17beta-diol monosulfate (1)	5a-Androstan-3a17b-DS	9	90	2.82609	0.281846
0.0228844	mvAge	pentraxin 3, long	pentraxin 3, long	pentraxin 3, long	9	90	-2.92317	0.292117	PTX3	ENSG00000163661	ENST00000295927	ENSP00000295927	P26022
0.023164	amyotrophic_lateral_sclerosis	interferon, gamma	interferon, gamma	interferon, gamma	9	90	-2.78486	0.276266	IFNG	ENSG00000111537	ENST00000229135	ENSP00000229135	P01579
0.0235581	Type_2_diabetes_SNPs_insulin_action_PGS000850	hydroquinone sulfate	hydroquinone sulfate	hydroquinone sulfate	9	90	3.13079	0.110164
0.0232101	Timmers_lifespan	tumor necrosis factor	tumor necrosis factor	tumor necrosis factor	9	90	-2.82627	0.230838	TNF	ENSG00000204490,ENSG00000228849,ENSG00000206439,ENSG00000228321,ENSG00000230108,ENSG00000223952,ENSG00000232810	ENST00000376122,ENST00000420425,ENST00000383496,ENST00000412275,ENST00000443707,ENST00000448781,ENST00000449264	ENSP00000365290,ENSP00000410668,ENSP00000372988,ENSP00000392858,ENSP00000389492,ENSP00000389490,ENSP00000398698	P01375
0.023655	Alzheimers_PGS002753	oleoylcholine	oleoylcholine	oleoylcholine	9	90	2.80857	0.24568
0.0224016	Timmers_lifespan	CARBON DIOXIDE (CO2)	carbon dioxide (co2)	carbon dioxide (co2)	9	90	-2.90971	0.201703
0.0232451	Timmers_healthspan	caffeine	caffeine	caffeine	9	90	-2.87244	0.230211
0.0251869	Parkinson_disease_PGS000903	tumor necrosis factor (ligand) superfamily, member 12	tnf (ligand) superfamily, member 12	tumor necrosis factor (ligand) superfamily, member 12	9	90	-2.79135	0.223253	TNFSF12	ENSG00000239697	ENST00000293825,ENST00000557233	ENSP00000293825,ENSP00000451451	O43508
0.0252594	mvAge	X - 16935	x - 16935	x - 16935	9	90	-2.7405	0.204835
0.0233418	T2D_cases_vs_HbA1c_filtered_controls_PGS000712	stearate (18:0)	stearate (18:0)	stearate (18:0)	9	90	2.78327	0.214517
0.0250905	Direct_bilirubin_umol_L_PGS000681	X - 23974	x - 23974	x - 23974	9	90	2.83176	0.206855
0.0252264	Timmers_longevity	p-cresol glucuronide*	p-cresol glucuronide*	p-cresol glucuronide*	9	90	2.8336	0.168585
0.0253312	Coronary_atherosclerosis_PGS002048	interleukin 22 receptor, alpha 1	interleukin 22RA1	interleukin 22 receptor, alpha 1	9	90	-2.81873	0.209031	IL22RA1	ENSG00000142677	ENST00000270800	ENSP00000270800	Q8N6P7
0.0264342	Heart_failure_PGS001790	interleukin 2 receptor, beta	interleukin 2 receptor, beta	IL2RŒ≤	9	90	2.76749	0.19048	IL2RB	ENSG00000100385	ENST00000216223	ENSP00000216223	P14784
0.0252024	frailty	X - 21258	x - 21258	x - 21258	9	90	2.81683	0.230875
0.0278037	Coronary_vascular_disease_CVD_PGS004514	plasminogen activator, urokinase	plasminogen activator, urokinase	plasminogen activator, urokinase	9	90	2.79696	0.211242	PLAU	ENSG00000122861	ENST00000372764	ENSP00000361850	P00749
0.0278037	Coronary_vascular_disease_CVD_PGS004514	plasminogen activator, urokinase	plasminogen activator, urokinase	plasminogen activator, urokinase	9	90	2.79696	0.211242	PLAU	ENSG00000122861	ENST00000372764	ENSP00000361850	P00749
0.027473	Coronary_artery_disease_PGS004941	4-ethylphenylsulfate	4-et-phenylsulfate	4-ethylphenylsulfate	9	90	-2.79505	0.144991
0.0278868	Alzheimer_disease_late_onset_PGS000053	X - 11849	x - 11849	x - 11849	9	90	-2.79243	0.171891
0.0306691	Type_2_diabetes_SNPs_insulin_action_PGS000850	2-aminophenol sulfate	2-aminophenol sulfate	2-aminophenol sulfate	9	90	2.68722	0.139776
0.0318565	Type_2_diabetes_SNPs_insulin_action_secretion_PGS000851	von Willebrand factor	von willebrand factor	von willebrand factor	9	90	-2.61713	0.134376	VWF	ENSG00000110799	ENST00000261405	ENSP00000261405	P04275
0.0324118	mvAge	chemokine (C-X-C motif) ligand 11	chemokine (c-x-c motif) ligand 11	chemokine (c-x-c motif) ligand 11	9	90	-2.68204	0.142519	CXCL11	ENSG00000169248	ENST00000306621,ENST00000503860	ENSP00000306884,ENSP00000425819	O14625
0.0332641	Longevity_PGS000906	androsterone sulfate	androsterone sulfate	androsterone sulfate	9	90	-2.70171	0.14104
0.0352453	Heart_failure_PGS001790	matrix metallopeptidase 2 (gelatinase A, 72kDa gelatinase, 72kDa type IV collagenase)	matrix metallopeptidase 2	MMP2	9	90	-2.63239	0.122956	MMP2	ENSG00000087245	ENST00000570308,ENST00000219070,ENST00000543485,ENST00000437642	ENSP00000461421,ENSP00000219070,ENSP00000444143,ENSP00000394237	P08253
0.0053032	Timmers_healthspan	URIC ACID	uric acid	uric acid	8	80	3.27833	0.706848
0.00646828	T2D_cases_vs_HbA1c_filtered_controls_PGS000712	LPIR_SCORE	lpir_score	lpir_score	8	80	3.26745	2.58566
0.0126613	T2D_cases_vs_HbA1c_filtered_controls_PGS000712	chemokine (C-X-C motif) ligand 9	chemokine (c-x-c motif) ligand 9	chemokine (c-x-c motif) ligand 9	8	80	-3.05775	0.335382	CXCL9	ENSG00000138755	ENST00000264888	ENSP00000354901	Q07325
0.013542	T2D_cases_vs_HbA1c_filtered_controls_PGS000712	X - 18922	x - 18922	x - 18922	8	80	3.06384	0.403542
0.0144717	Coronary_vascular_disease_CVD_PGS004514	WEIGHT_CALC	weight_calc	weight_calc	8	80	-3.12143	0.371218
0.0148928	Coronary_atherosclerosis_PGS002048	N-acetyltaurine	n-acetyltaurine	n-acetyltaurine	8	80	3.17802	0.414048
0.0159022	Timmers_longevity	sphingomyelin (d18:1/14:0, d16:1/16:0)*	sphingomyelin (d18:1/14:0, d16:1/16:0)*	sphingomyelin (d18:1/14:0, d16:1/16:0)*	8	80	3.16485	0.290385
0.016335	Type_2_diabetes_SNPs_insulin_action_PGS000850	3-methyl-2-oxobutyrate	3-methyl-2-oxobutyrate	3-methyl-2-oxobutyrate	8	80	-2.81923	0.34203
0.0168955	Timmers_healthspan	X - 16935	x - 16935	x - 16935	8	80	-3.0227	0.357532
0.0172604	Alzheimers_PGS002753	alpha-1-microglobulin/bikunin precursor	alpha-1-microglobulin/bikunin precursor	bikunin precusor	8	80	2.84286	0.338828	AMBP	ENSG00000106927	ENST00000265132	ENSP00000265132	P02760
0.0167894	HDL_cholesterol_PGS002781	renin	renin	renin	8	80	3.01413	0.307657	REN	ENSG00000143839	ENST00000272190,ENST00000367195	ENSP00000272190,ENSP00000356163	P00797
0.0176456	Parkinson_disease_PGS000903	X - 21736	x - 21736	x - 21736	8	80	-2.89183	0.270892
0.0164933	Parkinson_disease_PGS000903	leukemia inhibitory factor	leukemia inhibitory factor	leukemia inhibitory factor	8	80	2.83689	0.311143	LIF	ENSG00000128342	ENST00000249075,ENST00000403987	ENSP00000249075,ENSP00000384450	P15018
0.0186721	T2D_cases_vs_HbA1c_filtered_controls_PGS000712	gamma-glutamyl-alpha-lysine	gamma-glutamyl-alpha-lysine	gamma-glutamyl-alpha-lysine	8	80	2.82119	0.295229
0.0185314	Coronary_vascular_disease_CVD_PGS004514	serpin peptidase inhibitor, clade A (alpha-1 antiproteinase, antitrypsin), member 12	serpin peptidase inhibitor, clade a, member 12	SERPINA12	8	80	-2.95376	0.298513	SERPINA12	ENSG00000165953	ENST00000556881,ENST00000341228	ENSP00000451738,ENSP00000342109	Q8IW75
0.0187479	Parkinson_disease_PGS000903	picolinate	picolinate	picolinate	8	80	3.04507	0.303933
0.0191721	Type_2_diabetes_SNPs_insulin_action_PGS000850	X - 23680	x - 23680	x - 23680	8	80	-2.84551	0.325472
0.0191325	Heart_failure_PGS001790	carboxyethyl-GABA	carboxyethyl-gaba	carboxyethyl-gaba	8	80	2.97245	0.279618
0.0194693	Alzheimer_disease_late_onset_PGS000053	ectoine	ectoine	ectoine	8	80	-2.96697	0.281039
0.0194975	HDL_cholesterol_PGS002781	proteinase 3	proteinase 3	proteinase 3	8	80	3.05906	0.28973	PRTN3	ENSG00000196415	ENST00000234347	ENSP00000234347	P24158
0.0195078	LDL_cholesterol_PGS003873	methyl glucopyranoside (alpha + beta)	methyl glucopyranoside(alpha+beta)	methyl glucopyranoside (alpha + beta)	8	80	-2.99768	0.307255
0.019809	Timmers_lifespan	CUB domain containing protein 1	cub domain containing protein 1	cub domain containing protein 1	8	80	-2.90526	0.286707	CDCP1	ENSG00000163814	ENST00000296129,ENST00000425231	ENSP00000296129,ENSP00000399342	Q9H5V8
0.0205912	Longevity_PGS000906	malate	malate	malate	8	80	2.84591	0.270699
0.0210986	Timmers_healthspan	beta-cryptoxanthin	beta-cryptoxanthin	beta-cryptoxanthin	8	80	3.03226	0.166908
0.0215329	Coronary_atherosclerosis_PGS002048	BOC cell adhesion associated, oncogene regulated	boc cell adhesion associated	BOC	8	80	-2.91841	0.248373	BOC	ENSG00000144857	ENST00000495514,ENST00000273395,ENST00000355385	ENSP00000418663,ENSP00000273395,ENSP00000347546	Q9BWV1
0.0215329	Coronary_atherosclerosis_PGS002048	BOC cell adhesion associated, oncogene regulated	boc cell adhesion associated	BOC	8	80	-2.91841	0.248373	BOC	ENSG00000144857	ENST00000495514,ENST00000273395,ENST00000355385	ENSP00000418663,ENSP00000273395,ENSP00000347546	Q9BWV1
0.0221574	Alzheimer_disease_late_onset_PGS000053	X - 11378	x - 11378	x - 11378	8	80	-2.73553	0.262195
0.0225615	Heart_failure_PGS001790	cortolone glucuronide (1)	cortolone glucuronide (1)	cortolone glucuronide (1)	8	80	-3.00233	0.25239
0.0207754	Heart_failure_PGS001790	7-methylxanthine	7-methylxanthine	7-methylxanthine	8	80	-2.7291	0.25041
0.0221252	Timmers_lifespan	interleukin 10 receptor, beta	interleukin 10 receptor, beta	IL10RB	8	80	-2.73675	0.253534	IL10RB	ENSG00000243646	ENST00000290200	ENSP00000290200	Q08334
0.0208324	Coronary_vascular_disease_CVD_PGS004514	palmitoyl-linoleoyl-glycerol (16:0/18:2) [1]*	palmitoyl-linoleoyl-glycerol (16:0/18:2) [1]*	PLG(16:0/18:2)[1]	8	80	2.98497	0.178718
0.0224576	Cardiovascular_disease_PGS002316	3-methoxytyrosine	3-methoxytyrosine	3-methoxytyrosine	8	80	-2.82871	0.278829
0.0234025	frailty	myristoyl dihydrosphingomyelin (d18:0/14:0)*	myristoyl dihydrosphingomyelin (d18:0/14:0)*	SM(d18:0/14:0)	8	80	2.91743	0.191139
0.0236128	Timmers_lifespan	docosahexaenoylcholine	docosahexaenoylcholine	docosahexaenoylcholine	8	80	-2.75319	0.260061
0.0239082	Timmers_longevity	X - 23680	x - 23680	x - 23680	8	80	-2.88336	0.203109
0.0238601	LDL_cholesterol_PGS003873	S100 calcium binding protein A12	s100 calcium binding protein a12	s100 calcium binding protein a12	8	80	-2.76798	0.223068	S100A12	ENSG00000163221	ENST00000368737	ENSP00000357726	P80511
0.024195	Coronary_artery_disease_PGS004941	Fc fragment of IgG, low affinity IIb, receptor (CD32)	cd32	CD32	8	80	-2.8667	0.215517	FCGR2B	ENSG00000072694	ENST00000236937,ENST00000367961,ENST00000358671,ENST00000367962,ENST00000367960,ENST00000403078	ENSP00000236937,ENSP00000356938,ENSP00000351497,ENSP00000356939,ENSP00000356937,ENSP00000386038	P31994
0.0250109	Coronary_atherosclerosis_PGS002048	1-arachidonoyl-GPI (20:4)*	1-arachidonoyl-gpi (20:4)*	1-arachidonoyl-gpi (20:4)*	8	80	2.87255	0.215055
0.0264388	T2D_cases_vs_HbA1c_filtered_controls_PGS000712	fms-related tyrosine kinase 3 ligand	fms-related tyrosine kinase 3 ligand	fms-related tyrosine kinase 3 ligand	8	80	2.81532	0.201921	FLT3LG	ENSG00000090554	ENST00000597551,ENST00000600429,ENST00000594009,ENST00000344019	ENSP00000468977,ENSP00000470453,ENSP00000469613,ENSP00000341305	P49771
0.0266524	Alzheimer_disease_late_onset_PGS000053	5alpha-pregnan-3beta,20beta-diol monosulfate (1)	5alpha-preg-3b,20a-diol MS(1)	5Œ±-Preg-MS	8	80	-2.73987	0.219708
0.0262843	Longevity_PGS000906	2-linoleoyl-GPC (18:2)*	2-linoleoyl-gpc (18:2)*	2-linoleoyl-gpc (18:2)*	8	80	2.72363	0.234852
0.0270947	Coronary_artery_disease_PGS004941	pyridoxal	pyridoxal	pyridoxal	8	80	2.68717	0.186057
0.0247942	Cardiovascular_disease_PGS002316	X - 16935	x - 16935	x - 16935	8	80	-2.85373	0.226713
0.0268005	frailty	interleukin 22 receptor, alpha 1	interleukin 22RA1	interleukin 22 receptor, alpha 1	8	80	2.79158	0.19757	IL22RA1	ENSG00000142677	ENST00000270800	ENSP00000270800	Q8N6P7
0.0253249	Timmers_lifespan	interleukin 2 receptor, beta	interleukin 2 receptor, beta	IL2RŒ≤	8	80	2.7428	0.207488	IL2RB	ENSG00000100385	ENST00000216223	ENSP00000216223	P14784
0.0269037	Longevity_PGS000906	X - 11470	x - 11470	x - 11470	8	80	-2.7662	0.188631
0.026772	Timmers_healthspan	quinate	quinate	quinate	8	80	-2.80581	0.129554
0.0275389	Parkinson_disease_PGS000903	sphingomyelin (d18:2/21:0, d16:2/23:0)*	sphingomyelin(d18:2/21:0d16:2/23:0)*	sphingomyelin (d18:2/21:0, d16:2/23:0)*	8	80	-2.79745	0.179746
0.0282262	Timmers_healthspan	perfluorooctanoate (PFOA)	perfluorooctanoate (pfoa)	perfluorooctanoate (pfoa)	8	80	2.86418	0.133988
0.0278901	Alzheimer_disease_late_onset_PGS000053	perfluorooctanesulfonate (PFOS)	perfluorooctanesulfonate (pfos)	perfluorooctanesulfonate (pfos)	8	80	-2.81952	0.171641
0.02799	Timmers_longevity	X - 16935	x - 16935	x - 16935	8	80	2.76459	0.176883
0.0283848	Coronary_artery_disease_PGS004941	1-eicosapentaenoyl-GPE (20:5)*	1-eicosapentaenoyl-gpe (20:5)*	1-eicosapentaenoyl-gpe (20:5)*	8	80	2.80564	0.144783
0.0286796	Coronary_artery_disease_PGS004941	N-acetylglutamate	n-acetylglutamate	n-acetylglutamate	8	80	-2.77765	0.171972
0.0297312	Coronary_vascular_disease_CVD_PGS004514	3-hydroxyisobutyrate	3-hydroxyisobutyrate	3-hydroxyisobutyrate	8	80	-2.75389	0.164619
0.0277096	LDL_cholesterol_PGS003873	proprotein convertase subtilisin/kexin type 9	proprotein convertase subtilisin/kexin type 9	PCSK9	8	80	2.73087	0.125744	PCSK9	ENSG00000169174	ENST00000302118	ENSP00000303208	Q8NBP7
0.0294786	Type_2_diabetes_SNPs_insulin_action_PGS000850	matrix metallopeptidase 7 (matrilysin, uterine)	matrix metallopeptidase 7	matrix metallopeptidase 7 (matrilysin, uterine)	8	80	-2.68556	0.169488	MMP7	ENSG00000137673	ENST00000260227	ENSP00000260227	P09237
0.0288433	Type_2_diabetes_SNPs_insulin_action_secretion_PGS000851	cystine	cystine	cystine	8	80	2.71835	0.215594
0.03046	Longevity_PGS000906	alanine	alanine	alanine	8	80	2.62573	0.169964
0.0309355	Longevity_PGS000906	transforming growth factor, alpha	transforming growth factor, alpha	transforming growth factor, alpha	8	80	-2.73534	0.170785	TGFA	ENSG00000163235,ENSG00000272517	ENST00000295400,ENST00000445399,ENST00000418333,ENST00000607651,ENST00000607808,ENST00000606814	ENSP00000295400,ENSP00000387493,ENSP00000404099,ENSP00000475235,ENSP00000475945,ENSP00000475689	P01135
0.0309355	Longevity_PGS000906	transforming growth factor, alpha	transforming growth factor, alpha	transforming growth factor, alpha	8	80	-2.73534	0.170785	TGFA	ENSG00000163235,ENSG00000272517	ENST00000295400,ENST00000445399,ENST00000418333,ENST00000607651,ENST00000607808,ENST00000606814	ENSP00000295400,ENSP00000387493,ENSP00000404099,ENSP00000475235,ENSP00000475945,ENSP00000475689	P01135
0.0309385	frailty	notch 3	notch 3	notch 3	8	80	2.67741	0.182364	NOTCH3	ENSG00000074181	ENST00000263388	ENSP00000263388	Q9UM47
0.0319178	Type_2_diabetes_SNPs_insulin_action_PGS000850	LDL SMALL	ldl small	ldl small	8	80	-2.67106	0.162651
0.0324347	Heart_failure_PGS001790	interleukin 4 receptor	interleukin 4 receptor	IL4R	8	80	-2.69949	0.13847	IL4R	ENSG00000077238	ENST00000395762,ENST00000543915,ENST00000170630,ENST00000449195	ENSP00000379111,ENSP00000441667,ENSP00000170630,ENSP00000410322	P24394
0.0328512	Cardiovascular_disease_PGS002316	X - 23636	x - 23636	x - 23636	8	80	-2.69421	0.150637
0.0326031	Type_2_diabetes_T2D_PGS004923	X - 12729	x - 12729	x - 12729	8	80	2.79257	0.12856
0.0314341	HDL_cholesterol_PGS002781	isobutyrylglycine	isobutyrylglycine	isobutyrylglycine	8	80	-2.7014	0.100312
0.0314567	Type_2_diabetes_SNPs_insulin_action_secretion_PGS000851	glycosyl-N-palmitoyl-sphingosine (d18:1/16:0)	glcsl-n-palm-sphingosine(d18:1/16:0)	GlySph(d18:1/16:0)	8	80	-2.73645	0.15015
0.0334221	Parkinson_disease_PGS000903	c-fos induced growth factor (vascular endothelial growth factor D)	c-fos induced growth factor	VEGFD	8	80	2.78345	0.0684161	FIGF	ENSG00000165197	ENST00000297904	ENSP00000297904	O43915
0.0334221	Parkinson_disease_PGS000903	c-fos induced growth factor (vascular endothelial growth factor D)	c-fos induced growth factor	VEGFD	8	80	2.78345	0.0684161	FIGF	ENSG00000165197	ENST00000297904	ENSP00000297904	O43915
0.0352524	Longevity_PGS000906	citrate	citrate	citrate	8	80	2.63171	0.127139
0.0350202	Type_2_diabetes_SNPs_insulin_action_PGS000850	5-methyluridine (ribothymidine)	5-methyluridine (ribothymidine)	5-methyluridine (ribothymidine)	8	80	-2.65157	0.0992732
0.0345942	Longevity_PGS000906	1-(1-enyl-stearoyl)-2-docosahexaenoyl-GPC (P-18:0/22:6)*	1-(1-enyl-stearoyl)-2-docosahexaenoyl-gpc (p-18:0/22:6)*	GPC(p-18:0/22:6)	8	80	-2.65126	0.109997
0.0375154	Type_2_diabetes_SNPs_insulin_action_secretion_PGS000851	5-methylthioadenosine (MTA)	5-methylthioadenosine (mta)	5-methylthioadenosine (mta)	8	80	2.60454	0.126194
0.0376972	Coronary_vascular_disease_CVD_PGS004514	laurate (12:0)	laurate (12:0)	laurate (12:0)	8	80	2.60361	0.078225
0.00639166	frailty	HOMOCYSTEINE, SERUM	homocysteine, serum	homocysteine, serum	7	70	3.96697	0.378029
0.00687554	LDL_cholesterol_PGS003873	SODIUM	sodium	sodium	7	70	-4.16791	0.224428
0.00849324	LDL_cholesterol_PGS003873	GLYCOHEMOGLOBIN A1C	glycohemoglobin a1c	glycohemoglobin a1c	7	70	-3.95921	0.312255
0.00914358	HDL_cholesterol_PGS002781	GGT	ggt	ggt	7	70	3.91631	0.247285
0.00866091	Alzheimer_disease_late_onset_PGS000053	X - 17676	x - 17676	x - 17676	7	70	3.21542	0.598988
0.0111352	T2D_cases_vs_HbA1c_filtered_controls_PGS000712	FERRITIN	ferritin	ferritin	7	70	-3.57541	0.246972
0.0107256	HDL_cholesterol_PGS002781	Triglyceride HDL Ratio	triglyceride hdl ratio	triglyceride hdl ratio	7	70	-3.05358	0.554762
0.015143	Heart_failure_PGS001790	N-acetylcarnosine	n-acetylcarnosine	n-acetylcarnosine	7	70	-3.29698	0.223173
0.0155293	HDL_cholesterol_PGS002781	insulin-like growth factor binding protein 2, 36kDa	insulin-like growth factor binding protein 2, 36kda	IGFBP2	7	70	-3.25643	0.272993	IGFBP2	ENSG00000115457	ENST00000233809	ENSP00000233809	P18065
0.0158792	Heart_failure_PGS001790	5alpha-pregnan-3beta,20alpha-diol monosulfate (2)	5alpha-preg-3b,20a-diol MS(2)	5Œ±-Preg-MS2	7	70	3.08615	0.372045
0.0162521	Parkinson_disease_PGS000903	pregnanediol-3-glucuronide	pregnanediol-3-glucuronide	pregnanediol-3-glucuronide	7	70	-3.00666	0.353777
0.0167865	Parkinson_disease_PGS000903	1-(1-enyl-palmitoyl)-2-linoleoyl-GPC (P-16:0/18:2)*	1-(1-enyl-palmi)-2-lino-gpc(p-16:0/18:2)*	GPC(p-16:0/18:2)	7	70	3.07054	0.310266
0.0171288	T2D_cases_vs_HbA1c_filtered_controls_PGS000712	KIT ligand	kit ligand	kit ligand	7	70	3.03957	0.327608	KITLG	ENSG00000049130	ENST00000228280,ENST00000347404	ENSP00000228280,ENSP00000054216	P21583
0.0171288	T2D_cases_vs_HbA1c_filtered_controls_PGS000712	KIT ligand	kit ligand	kit ligand	7	70	3.03957	0.327608	KITLG	ENSG00000049130	ENST00000228280,ENST00000347404	ENSP00000228280,ENSP00000054216	P21583
0.0171288	T2D_cases_vs_HbA1c_filtered_controls_PGS000712	KIT ligand	kit ligand	kit ligand	7	70	3.03957	0.327608	KITLG	ENSG00000049130	ENST00000228280,ENST00000347404	ENSP00000228280,ENSP00000054216	P21583
0.0170012	LDL_cholesterol_PGS003873	LDL PARTICLE NUMBER	ldl particle number	ldl particle number	7	70	3.03583	0.243567
0.0173561	T2D_cases_vs_HbA1c_filtered_controls_PGS000712	urea	urea	urea	7	70	3.29848	0.206992
0.0173777	T2D_cases_vs_HbA1c_filtered_controls_PGS000712	N-acetylmethionine	n-acetylmethionine	n-acetylmethionine	7	70	-3.13668	0.240794
0.0170834	Longevity_PGS000906	chemokine (C motif) ligand 1	chemokine (c motif) ligand 1	chemokine (c motif) ligand 1	7	70	-3.06574	0.297714	XCL1	ENSG00000143184	ENST00000367818	ENSP00000356792	P47992
0.0175346	Coronary_artery_disease_PGS004941	Triglyceride HDL Ratio	triglyceride hdl ratio	triglyceride hdl ratio	7	70	-3.20433	0.211954
0.0179634	Coronary_artery_disease_PGS004941	1-myristoyl-2-arachidonoyl-GPC (14:0/20:4)*	1-myr-2-arachid-gpc(14:0/20:4)*	1-myristoyl-2-arachidonoyl-gpc (14:0/20:4)*	7	70	-2.95433	0.282335
0.0180684	Heart_failure_PGS001790	FERRITIN	ferritin	ferritin	7	70	-3.20922	0.261591
0.0181734	Timmers_healthspan	glycodeoxycholate 3-sulfate	glycodeoxycholate 3-sulfate	glycodeoxycholate 3-sulfate	7	70	2.93548	0.319171
0.0182546	Timmers_lifespan	HDL PARTICLE NUMBER	hdl particle number	hdl particle number	7	70	3.13965	0.263427
0.0176047	HDL_cholesterol_PGS002781	N-behenoyl-sphingadienine (d18:2/22:0)*	n-behenoyl-sphingadienine (d18:2/22:0)*	n-behenoyl-sphingadienine (d18:2/22:0)*	7	70	-3.11288	0.274997
0.0182167	mvAge	succinate	succinate	succinate	7	70	3.07035	0.213106
0.019301	T2D_cases_vs_HbA1c_filtered_controls_PGS000712	etiocholanolone glucuronide	etiocholanolone glucuronide	etiocholanolone glucuronide	7	70	2.8664	0.299323
0.019387	Coronary_vascular_disease_CVD_PGS004514	2-oleoyl-GPE (18:1)*	2-oleoyl-gpe (18:1)*	2-oleoyl-gpe (18:1)*	7	70	-2.91068	0.242284
0.0201109	Type_2_diabetes_SNPs_insulin_action_secretion_PGS000851	4-allylcatechol sulfate	4-allylcatechol sulfate	4-allylcatechol sulfate	7	70	2.94919	0.270255
0.0188656	LDL_cholesterol_PGS003873	cholesterol	cholesterol	cholesterol	7	70	2.85052	0.344357
0.0200437	Coronary_atherosclerosis_PGS002048	GLYCOHEMOGLOBIN A1C	glycohemoglobin a1c	glycohemoglobin a1c	7	70	-3.18538	0.140551
0.0202335	Timmers_healthspan	ASAT (SGOT)	asat (sgot)	asat (sgot)	7	70	-3.25563	0.133003
0.0202151	Type_2_diabetes_SNPs_insulin_action_secretion_PGS000851	LPIR_SCORE	lpir_score	lpir_score	7	70	3.07258	0.26366
0.0195177	Coronary_atherosclerosis_PGS002048	16-hydroxypalmitate	16-hydroxypalmitate	16-hydroxypalmitate	7	70	2.80545	0.344863
0.021455	Heart_failure_PGS001790	X - 15492	x - 15492	x - 15492	7	70	-2.95842	0.273753
0.0210698	Coronary_artery_disease_PGS004941	pregnanediol-3-glucuronide	pregnanediol-3-glucuronide	pregnanediol-3-glucuronide	7	70	2.97634	0.265499
0.0214091	Heart_failure_PGS001790	dodecanedioate (C12-DC)	dodecanedioate (c12-dc)	dodecanedioate (c12-dc)	7	70	2.7355	0.307764
0.0218691	Coronary_atherosclerosis_PGS002048	octadecadienedioate (C18:2-DC)*	octadecadienedioate (c18:2-dc)*	octadecadienedioate (c18:2-dc)*	7	70	-2.85837	0.275339
0.0217498	frailty	c-fos induced growth factor (vascular endothelial growth factor D)	c-fos induced growth factor	VEGFD	7	70	-2.92111	0.262302	FIGF	ENSG00000165197	ENST00000297904	ENSP00000297904	O43915
0.0217498	frailty	c-fos induced growth factor (vascular endothelial growth factor D)	c-fos induced growth factor	VEGFD	7	70	-2.92111	0.262302	FIGF	ENSG00000165197	ENST00000297904	ENSP00000297904	O43915
0.0226043	Timmers_longevity	1-(1-enyl-stearoyl)-2-dihomo-linolenoyl-GPE (P-18:0/20:3)*	1-(1-enyl-stearoyl)-2-dihomo-linolenoyl-gpe (p-18:0/20:3)*	GPE(p-18:0/20:3)	7	70	-2.87723	0.279825
0.0224104	HDL_cholesterol_PGS002781	FERRITIN	ferritin	ferritin	7	70	-2.90556	0.225246
0.0223992	Timmers_longevity	3-formylindole	3-formylindole	3-formylindole	7	70	2.87676	0.230377
0.0215209	Alzheimers_PGS002753	linoleoylcholine*	linoleoylcholine*	linoleoylcholine*	7	70	2.91088	0.205581
0.0230471	Type_2_diabetes_SNPs_insulin_action_PGS000850	5-methylthioadenosine (MTA)	5-methylthioadenosine (mta)	5-methylthioadenosine (mta)	7	70	3.0042	0.23607
0.0215914	Timmers_healthspan	interleukin 2 receptor, beta	interleukin 2 receptor, beta	IL2RŒ≤	7	70	-2.83592	0.301584	IL2RB	ENSG00000100385	ENST00000216223	ENSP00000216223	P14784
0.02311	Alzheimer_disease_late_onset_PGS000053	artemin	artemin	artemin	7	70	-2.82838	0.188456	ARTN	ENSG00000117407	ENST00000372359,ENST00000498139,ENST00000372354,ENST00000438616,ENST00000414809	ENSP00000361434,ENSP00000436727,ENSP00000361429,ENSP00000391998,ENSP00000387435	Q5T4W7
0.0237083	HDL_cholesterol_PGS002781	isobutyrylcarnitine (C4)	isobutyrylcarnitine (c4)	isobutyrylcarnitine (c4)	7	70	-2.75873	0.255447
0.0244072	Coronary_atherosclerosis_PGS002048	lipoprotein lipase	lipoprotein lipase	lipoprotein lipase	7	70	2.94335	0.245464	LPL	ENSG00000175445	ENST00000311322	ENSP00000309757	P06858
0.0239352	Coronary_artery_disease_PGS004941	X - 24544	x - 24544	x - 24544	7	70	-2.83093	0.193494
0.0241236	Alzheimers_PGS002753	androstenediol (3beta,17beta) monosulfate (2)	androstenediol(3beta,17beta)monosulfate(2)	Androstenediol-3b17b-MS-2	7	70	2.90823	0.222713
0.0227196	Timmers_lifespan	CRP HIGH SENSITIVITY	crp high sensitivity	crp high sensitivity	7	70	-2.74646	0.275719
0.0242475	Heart_failure_PGS001790	GLYCOHEMOGLOBIN A1C	glycohemoglobin a1c	glycohemoglobin a1c	7	70	2.99951	0.159973
0.0248531	Alzheimer_disease_late_onset_PGS000053	chemokine (C-C motif) ligand 2	chemokine (c-c motif) ligand 2	chemokine (c-c motif) ligand 2	7	70	2.74302	0.240876	CCL2	ENSG00000108691	ENST00000225831	ENSP00000225831	P13500
0.0248531	Alzheimer_disease_late_onset_PGS000053	chemokine (C-C motif) ligand 2	chemokine (c-c motif) ligand 2	chemokine (c-c motif) ligand 2	7	70	2.74302	0.240876	CCL2	ENSG00000108691	ENST00000225831	ENSP00000225831	P13500
0.0251854	mvAge	stachydrine	stachydrine	stachydrine	7	70	2.82165	0.183321
0.0256357	Alzheimer_disease_late_onset_PGS000053	orotate	orotate	orotate	7	70	2.73025	0.256469
0.025127	HDL_cholesterol_PGS002781	X - 12707	x - 12707	x - 12707	7	70	-2.77163	0.205742
0.0259068	Parkinson_disease_PGS000903	5-dodecenoylcarnitine (C12:1)	5-dodecenoylcarnitine (c12:1)	5-dodecenoylcarnitine (c12:1)	7	70	2.90472	0.191362
0.0259571	HDL_cholesterol_PGS002781	azurocidin 1	azurocidin 1	azurocidin 1	7	70	2.73328	0.201289	AZU1	ENSG00000172232	ENST00000233997	ENSP00000233997	P20160
0.0256481	amyotrophic_lateral_sclerosis	erythritol	erythritol	erythritol	7	70	-2.90164	0.204536
0.0262677	Alzheimer_disease_late_onset_PGS000053	uracil	uracil	uracil	7	70	2.73342	0.223076
0.0261278	Alzheimers_PGS002753	X - 24337	x - 24337	x - 24337	7	70	-2.81822	0.23083
0.024994	LDL_cholesterol_PGS003873	glycochenodeoxycholate 3-sulfate	glycochenodeoxychola-3-so4	glycochenodeoxycholate 3-sulfate	7	70	2.89166	0.220792
0.0265007	Timmers_healthspan	salicylate	salicylate	salicylate	7	70	-2.78162	0.206984
0.0262063	Coronary_atherosclerosis_PGS002048	glycocholate	glycocholate	glycocholate	7	70	-2.74747	0.252446
0.0265759	Timmers_lifespan	ethyl alpha-glucopyranoside	ethyl alpha-glucopyranoside	ethyl alpha-glucopyranoside	7	70	-2.78903	0.174064
0.0268694	LDL_cholesterol_PGS003873	N2,N5-diacetylornithine	n2,n5-diacetylornithine	n2,n5-diacetylornithine	7	70	-2.72977	0.19531
0.0275639	amyotrophic_lateral_sclerosis	interleukin 22 receptor, alpha 1	interleukin 22RA1	interleukin 22 receptor, alpha 1	7	70	-2.68138	0.18963	IL22RA1	ENSG00000142677	ENST00000270800	ENSP00000270800	Q8N6P7
0.0253524	T2D_cases_vs_HbA1c_filtered_controls_PGS000712	X - 22776	x - 22776	x - 22776	7	70	2.75054	0.155893
0.0278491	Type_2_diabetes_SNPs_insulin_action_PGS000850	S-methylcysteine	s-methylcysteine	s-methylcysteine	7	70	-2.8625	0.20279
0.0259847	Timmers_lifespan	tumor necrosis factor receptor superfamily, member 10c, decoy without an intracellular domain	tnf receptor superfamily, member 10c, decoy	TNFRSF10C	7	70	-2.72465	0.235754	TNFRSF10C	ENSG00000173535	ENST00000356864	ENSP00000349324	O14798
0.0281323	amyotrophic_lateral_sclerosis	glycochenodeoxycholate	glycochenodeoxycholate	glycochenodeoxycholate	7	70	-2.82716	0.167646
0.0283045	Timmers_healthspan	X - 24243	x - 24243	x - 24243	7	70	-2.81614	0.161372
0.0286774	LDL_cholesterol_PGS003873	X - 07765	x - 07765	x - 07765	7	70	-2.85642	0.142918
0.0282216	Timmers_longevity	taurocholenate sulfate*	taurocholenate sulfate*	taurocholenate sulfate*	7	70	2.74166	0.193615
0.029326	T2D_cases_vs_HbA1c_filtered_controls_PGS000712	interleukin 2	interleukin 2	IL2	7	70	2.62865	0.189144	IL2	ENSG00000109471	ENST00000226730	ENSP00000226730	P60568
0.0297931	HDL_cholesterol_PGS002781	secreted phosphoprotein 1	secreted phosphoprotein 1	secreted phosphoprotein 1	7	70	-2.75197	0.178903	SPP1	ENSG00000118785	ENST00000237623,ENST00000395080,ENST00000360804	ENSP00000237623,ENSP00000378517,ENSP00000354042	P10451
0.0299668	Type_2_diabetes_SNPs_insulin_action_secretion_PGS000851	PULSE_PRESSURE	pulse_pressure	pulse_pressure	7	70	2.68852	0.218577
0.0296774	HDL_cholesterol_PGS002781	inosine	inosine	inosine	7	70	2.65241	0.174356
0.0301906	Coronary_vascular_disease_CVD_PGS004514	interleukin 27;Epstein-Barr virus induced 3	interleukin 27;epstein-barr virus induced 3	IL27_EBI3	7	70	2.80881	0.136155	IL27,EBI3	ENSG00000197272,ENSG00000105246	ENST00000356897,ENST00000221847	ENSP00000349365,ENSP00000221847	Q8NEV9,Q14213
0.0305265	Coronary_artery_disease_PGS004941	palmitoyl-linoleoyl-glycerol (16:0/18:2) [2]*	palm-lino-glyc(16:0/18:2)[2]*	PLG(16:0/18:2)[2]	7	70	-2.72687	0.160505
0.0300447	Cardiovascular_disease_PGS002316	methylsuccinate	methylsuccinate	methylsuccinate	7	70	-2.73064	0.164961
0.0299506	mvAge	X - 12798	x - 12798	x - 12798	7	70	2.69707	0.139753
0.0311913	frailty	acisoga	acisoga	acisoga	7	70	2.73287	0.194071
0.0312893	Coronary_atherosclerosis_PGS002048	gamma-glutamylleucine	gamma-glutamylleucine	gamma-glutamylleucine	7	70	2.77812	0.161598
0.030285	Alzheimers_PGS002753	1-palmitoyl-2-oleoyl-GPE (16:0/18:1)	1-palmitoyl-2-oleoyl-gpe (16:0/18:1)	GPE(16:0/18:1)	7	70	2.67545	0.190543
0.0292376	amyotrophic_lateral_sclerosis	artemin	artemin	artemin	7	70	2.67333	0.163713	ARTN	ENSG00000117407	ENST00000372359,ENST00000498139,ENST00000372354,ENST00000438616,ENST00000414809	ENSP00000361434,ENSP00000436727,ENSP00000361429,ENSP00000391998,ENSP00000387435	Q5T4W7
0.031271	LDL_cholesterol_PGS003873	X - 24556	x - 24556	x - 24556	7	70	2.83826	0.145458
0.0319315	Parkinson_disease_PGS000903	tartronate (hydroxymalonate)	tartronate (hydroxymalonate)	tartronate (hydroxymalonate)	7	70	-2.81415	0.0700542
0.0324913	Direct_bilirubin_umol_L_PGS000681	1-palmitoyl-2-(hydroxylinoleoyl)-GPC (16:0/18:2(OH))*	1-palmitoyl-2-(hydroxylinoleoyl)-gpc (16:0/18:2(oh))*	GPC(16:0/18:2(OH))	7	70	2.65795	0.164444
0.0321682	Coronary_vascular_disease_CVD_PGS004514	2-arachidonoyl-GPE (20:4)*	2-arachidonoyl-gpe (20:4)*	2-arachidonoyl-gpe (20:4)*	7	70	-2.68876	0.16858
0.0323394	LDL_cholesterol_PGS003873	10-heptadecenoate (17:1n7)	10-heptadecenoate (17:1n7)	10-heptadecenoate (17:1n7)	7	70	-2.70578	0.131657
0.0328615	Coronary_artery_disease_PGS004941	pregnenetriol disulfate*	pregnenetriol disulfate*	pregnenetriol disulfate*	7	70	-2.63171	0.177646
0.0332091	amyotrophic_lateral_sclerosis	glial cell derived neurotrophic factor	glial cell derived neurotrophic factor	glial cell derived neurotrophic factor	7	70	2.75018	0.0734541	GDNF	ENSG00000168621	ENST00000326524,ENST00000381826,ENST00000427982,ENST00000515058,ENST00000510177,ENST00000502572,ENST00000344622	ENSP00000317145,ENSP00000371248,ENSP00000409007,ENSP00000425928,ENSP00000424592,ENSP00000423557,ENSP00000339703	P39905
0.0332091	amyotrophic_lateral_sclerosis	glial cell derived neurotrophic factor	glial cell derived neurotrophic factor	glial cell derived neurotrophic factor	7	70	2.75018	0.0734541	GDNF	ENSG00000168621	ENST00000326524,ENST00000381826,ENST00000427982,ENST00000515058,ENST00000510177,ENST00000502572,ENST00000344622	ENSP00000317145,ENSP00000371248,ENSP00000409007,ENSP00000425928,ENSP00000424592,ENSP00000423557,ENSP00000339703	P39905
0.0339589	T2D_cases_vs_HbA1c_filtered_controls_PGS000712	ornithine	ornithine	ornithine	7	70	2.6713	0.163613
0.0339086	mvAge	vascular endothelial growth factor A	vegfa	vascular endothelial growth factor a	7	70	-2.63204	0.165349	VEGFA	ENSG00000112715	ENST00000372077,ENST00000520948,ENST00000523873,ENST00000523950,ENST00000457104,ENST00000518689,ENST00000523125,ENST00000518824	ENSP00000361148,ENSP00000428321,ENSP00000430479,ENSP00000429643,ENSP00000409911,ENSP00000430829,ENSP00000429008,ENSP00000430002	P15692
0.0339086	mvAge	vascular endothelial growth factor A	vegfa	vascular endothelial growth factor a	7	70	-2.63204	0.165349	VEGFA	ENSG00000112715	ENST00000372077,ENST00000520948,ENST00000523873,ENST00000523950,ENST00000457104,ENST00000518689,ENST00000523125,ENST00000518824	ENSP00000361148,ENSP00000428321,ENSP00000430479,ENSP00000429643,ENSP00000409911,ENSP00000430829,ENSP00000429008,ENSP00000430002	P15692
0.0338626	Direct_bilirubin_umol_L_PGS000681	4-methylcatechol sulfate	4-methylcatechol sulfate	4-methylcatechol sulfate	7	70	2.68655	0.152866
0.0343624	Type_2_diabetes_SNPs_insulin_action_secretion_PGS000851	1-docosapentaenoyl-GPC (22:5n6)*	1-docopent-gpc(22:5n6)*	1-docosapentaenoyl-gpc (22:5n6)*	7	70	2.70097	0.0950493
0.0324675	frailty	3-hydroxyisobutyrate	3-hydroxyisobutyrate	3-hydroxyisobutyrate	7	70	-2.64751	0.137685
0.0343588	Type_2_diabetes_SNPs_insulin_action_PGS000850	4-methyl-2-oxopentanoate	4-methyl-2-oxopentanoate	4-methyl-2-oxopentanoate	7	70	-2.57523	0.148104
0.0344266	Type_2_diabetes_SNPs_insulin_action_PGS000850	cystatin D	cystatin d	cystatin d	7	70	-2.61689	0.14124	CST5	ENSG00000170367	ENST00000304710	ENSP00000307132	P28325
0.0344263	Timmers_healthspan	chemokine (C-C motif) ligand 20	chemokine (c-c motif) ligand 20	chemokine (c-c motif) ligand 20	7	70	-2.59371	0.159666	CCL20	ENSG00000115009	ENST00000409189,ENST00000358813	ENSP00000386273,ENSP00000351671	P78556
0.0331745	amyotrophic_lateral_sclerosis	carotene diol (1)	carotene diol (1)	carotene diol (1)	7	70	-2.66761	0.136974
0.0348444	Alzheimer_disease_late_onset_PGS000053	sphingomyelin (d18:1/20:2, d18:2/20:1, d16:1/22:2)*	sphingomyelin (d18:1/20:2, d18:2/20:1, d16:1/22:2)*	SM(d18:1/20:2...)	7	70	2.67229	0.11956
0.0351657	Longevity_PGS000906	lignoceroyl sphingomyelin (d18:1/24:0)	lignoceroyl sphingomyelin (d18:1/24:0)	lignoceroyl sphingomyelin (d18:1/24:0)	7	70	-2.65343	0.123713
0.0357927	frailty	X - 23590	x - 23590	x - 23590	7	70	-2.6864	0.111259
0.0343234	Type_2_diabetes_SNPs_insulin_action_secretion_PGS000851	pro-hydroxy-pro	pro-hydroxy-pro	pro-hydroxy-pro	7	70	-2.6442	0.139403
0.0356851	Type_2_diabetes_SNPs_insulin_action_PGS000850	1-linolenoyl-GPC (18:3)*	1-linolenoyl-gpc (18:3)*	1-linolenoyl-gpc (18:3)*	7	70	-2.64395	0.126466
0.0366048	Cardiovascular_disease_PGS002316	X - 19141	x - 19141	x - 19141	7	70	-2.66723	0.0815064
0.0369141	amyotrophic_lateral_sclerosis	1-(1-enyl-stearoyl)-2-docosapentaenoyl-GPE (P-18:0/22:5n3)*	1(1-en-stear)2docosapent-gpe(p-18:0/22:5n3)*	GPE(p-18:0/22:5n3)	7	70	2.64633	0.12894
0.0368503	Alzheimer_disease_late_onset_PGS000053	selectin P ligand	selectin p ligand	selectin p ligand	7	70	2.61683	0.0931426	SELPLG	ENSG00000110876	ENST00000550948,ENST00000228463,ENST00000388962	ENSP00000447752,ENSP00000228463,ENSP00000373614	Q14242
0.042337	Direct_bilirubin_umol_L_PGS000681	X - 11442	x - 11442	x - 11442	7	70	2.57472	0.0580592
0.0430683	Direct_bilirubin_umol_L_PGS000681	cortisone	cortisone	cortisone	7	70	-2.52529	0.0616804
0.0124696	Coronary_artery_disease_PGS004941	chitinase 1 (chitotriosidase)	chitinase 1 (chitotriosidase)	chitinase 1 (chitotriosidase)	6	60	-2.8736	0.507614	CHIT1	ENSG00000133063	ENST00000367229,ENST00000491855,ENST00000255427	ENSP00000356198,ENSP00000423778,ENSP00000255427	Q13231
0.0143371	Type_2_diabetes_SNPs_insulin_action_PGS000850	Triglyceride HDL Ratio	triglyceride hdl ratio	triglyceride hdl ratio	6	60	3.00137	0.406079
0.0192131	T2D_cases_vs_HbA1c_filtered_controls_PGS000712	docosahexaenoylcholine	docosahexaenoylcholine	docosahexaenoylcholine	6	60	-3.07122	0.266284
0.0193587	Timmers_healthspan	peptidase inhibitor 3, skin-derived	peptidase inhibitor 3, skin-derived	peptidase inhibitor 3, skin-derived	6	60	2.77885	0.337539	PI3	ENSG00000124102	ENST00000243924	ENSP00000243924	P19957
0.0203807	T2D_cases_vs_HbA1c_filtered_controls_PGS000712	cholate	cholate	cholate	6	60	-2.90299	0.328579
0.0221766	Type_2_diabetes_SNPs_insulin_action_secretion_PGS000851	N-acetyltryptophan	n-acetyltryptophan	n-acetyltryptophan	6	60	2.84626	0.292477
0.0217554	Coronary_vascular_disease_CVD_PGS004514	5-methyluridine (ribothymidine)	5-methyluridine (ribothymidine)	5-methyluridine (ribothymidine)	6	60	2.97978	0.240435
0.021891	Alzheimers_PGS002753	X - 24306	x - 24306	x - 24306	6	60	2.77288	0.272096
0.022849	Parkinson_disease_PGS000903	X - 11299	x - 11299	x - 11299	6	60	-2.8795	0.324534
0.0236296	Alzheimer_disease_late_onset_PGS000053	GGT	ggt	ggt	6	60	-2.82019	0.222315
0.0231721	Coronary_atherosclerosis_PGS002048	deoxycholic acid glucuronide	deoxycholicacidglucuronide	deoxycholic acid glucuronide	6	60	-2.78155	0.243737
0.0236848	LDL_cholesterol_PGS003873	glutarylcarnitine (C5-DC)	glutarylcarnitine (c5-dc)	glutarylcarnitine (c5-dc)	6	60	2.77394	0.251488
0.0237336	Timmers_healthspan	interleukin 4	interleukin 4	interleukin 4	6	60	3.00926	0.147485	IL4	ENSG00000113520	ENST00000231449,ENST00000350025	ENSP00000231449,ENSP00000325190	P05112
0.0249772	Alzheimers_PGS002753	glutamine conjugate of C6H10O2 (2)*	glutamine conjugate of c6h10o2 (2)*	glutamine conjugate of c6h10o2 (2)*	6	60	2.86553	0.246253
0.0254348	amyotrophic_lateral_sclerosis	X - 13835	x - 13835	x - 13835	6	60	-2.7878	0.26346
0.0255433	frailty	imidazole propionate	imidazole propionate	imidazole propionate	6	60	-2.84255	0.317968
0.0263675	HDL_cholesterol_PGS002781	sphingomyelin (d18:2/23:1)*	sphingomyelin (d18:2/23:1)*	sphingomyelin (d18:2/23:1)*	6	60	2.82408	0.195555
0.0265596	Alzheimers_PGS002753	pregnenediol disulfate (C21H34O8S2)*	pregnenediol disulfate (c21h34o8s2)*	pregnenediol disulfate (c21h34o8s2)*	6	60	2.8123	0.23371
0.0261665	LDL_cholesterol_PGS003873	3-methoxytyrosine	3-methoxytyrosine	3-methoxytyrosine	6	60	-2.82182	0.194533
0.0267999	Timmers_healthspan	orotate	orotate	orotate	6	60	2.73483	0.204322
0.0270913	Timmers_longevity	X - 11847	x - 11847	x - 11847	6	60	2.75305	0.214246
0.0278041	mvAge	X - 17357	x - 17357	x - 17357	6	60	-2.79755	0.142458
0.0275791	T2D_cases_vs_HbA1c_filtered_controls_PGS000712	chitinase 3-like 1 (cartilage glycoprotein-39)	chitinase 3-like 1	CHI3L1	6	60	-2.71379	0.20836	CHI3L1	ENSG00000133048	ENST00000255409	ENSP00000255409	P36222
0.027747	Type_2_diabetes_SNPs_insulin_action_PGS000850	taurodeoxycholate	taurodeoxycholate	taurodeoxycholate	6	60	-2.72862	0.210117
0.0269513	Direct_bilirubin_umol_L_PGS000681	phosphate	phosphate	phosphate	6	60	-2.77097	0.150399
0.0285781	mvAge	S-allylcysteine	s-allylcysteine	s-allylcysteine	6	60	-2.67657	0.23207
0.0288648	HDL_cholesterol_PGS002781	selectin P ligand	selectin p ligand	selectin p ligand	6	60	-2.77272	0.167492	SELPLG	ENSG00000110876	ENST00000550948,ENST00000228463,ENST00000388962	ENSP00000447752,ENSP00000228463,ENSP00000373614	Q14242
0.0273098	Longevity_PGS000906	3-methoxytyrosine	3-methoxytyrosine	3-methoxytyrosine	6	60	2.64166	0.198898
0.0294979	HDL_cholesterol_PGS002781	hypoxanthine	hypoxanthine	hypoxanthine	6	60	2.68887	0.207085
0.0276262	Timmers_lifespan	X - 11483	x - 11483	x - 11483	6	60	2.77798	0.237809
0.0298427	HDL_cholesterol_PGS002781	docosadioate (C22-DC)	docosadioate (c22-dc)	docosadioate (c22-dc)	6	60	2.66382	0.162492
0.0296795	amyotrophic_lateral_sclerosis	acid phosphatase 5, tartrate resistant	acid phosphatase 5, tartrate resistant	acid phosphatase 5, tartrate resistant	6	60	2.66828	0.163333	ACP5	ENSG00000102575	ENST00000218758,ENST00000412435,ENST00000592828,ENST00000433365	ENSP00000218758,ENSP00000392374,ENSP00000468767,ENSP00000413456	P13686
0.0301469	Type_2_diabetes_SNPs_insulin_action_PGS000850	3-phenylpropionate (hydrocinnamate)	3-phenylpropionate	3-phenylpropionate (hydrocinnamate)	6	60	-2.75031	0.186814
0.0298711	Coronary_vascular_disease_CVD_PGS004514	ALAT (SGPT)	alat (sgpt)	alat (sgpt)	6	60	-2.82493	0.195477
0.0287365	T2D_cases_vs_HbA1c_filtered_controls_PGS000712	chitinase 1 (chitotriosidase)	chitinase 1 (chitotriosidase)	chitinase 1 (chitotriosidase)	6	60	2.78117	0.149688	CHIT1	ENSG00000133063	ENST00000367229,ENST00000491855,ENST00000255427	ENSP00000356198,ENSP00000423778,ENSP00000255427	Q13231
0.0291443	Type_2_diabetes_SNPs_insulin_action_PGS000850	tridecenedioate (C13:1-DC)*	tridecenedioate (c13:1-dc)*	tridecenedioate (c13:1-dc)*	6	60	2.62822	0.1798
0.0308031	Parkinson_disease_PGS000903	X - 23739	x - 23739	x - 23739	6	60	2.6665	0.158561
0.0308332	frailty	X - 15503	x - 15503	x - 15503	6	60	-2.67019	0.187658
0.031539	Parkinson_disease_PGS000903	gamma-glutamylthreonine	gamma-glutamylthreonine	gamma-glutamylthreonine	6	60	2.64782	0.162113
0.0316546	frailty	androstenediol (3alpha, 17alpha) monosulfate (2)	androstenediol(3alpha, 17alpha)monosulfate(2)	androstenediol (3alpha, 17alpha) monosulfate (2)	6	60	-2.72006	0.139947
0.0315235	Coronary_artery_disease_PGS004941	programmed cell death 1 ligand 2	programmed cell death 1 ligand 2	programmed cell death 1 ligand 2	6	60	-2.72637	0.139748	PDCD1LG2	ENSG00000197646	ENST00000397747,ENST00000397745	ENSP00000380855,ENSP00000380853	Q9BQ51
0.0301559	Timmers_lifespan	quinolinate	quinolinate	quinolinate	6	60	2.71611	0.128425
0.0322824	Alzheimers_PGS002753	FERRITIN	ferritin	ferritin	6	60	-2.70144	0.147523
0.0321171	LDL_cholesterol_PGS003873	2-arachidonoyl-GPC (20:4)*	2-arachidonoyl-gpc (20:4)*	2-arachidonoyl-gpc (20:4)*	6	60	2.70408	0.17346
0.0322149	Type_2_diabetes_SNPs_insulin_action_secretion_PGS000851	chemokine (C-C motif) ligand 28	chemokine (c-c motif) ligand 28	chemokine (c-c motif) ligand 28	6	60	2.58515	0.16641	CCL28	ENSG00000151882	ENST00000489442,ENST00000361115,ENST00000537013	ENSP00000426424,ENSP00000354416,ENSP00000443823	Q9NRJ3
0.0324964	Coronary_atherosclerosis_PGS002048	ceramide (d18:1/17:0, d17:1/18:0)*	ceramide (d18:1/17:0, d17:1/18:0)*	ceramide (d18:1/17:0, d17:1/18:0)*	6	60	2.6844	0.134401
0.0319492	Coronary_atherosclerosis_PGS002048	X - 23636	x - 23636	x - 23636	6	60	2.70098	0.135922
0.0329204	Coronary_artery_disease_PGS004941	X - 21470	x - 21470	x - 21470	6	60	-2.69046	0.156248
0.0331874	Coronary_vascular_disease_CVD_PGS004514	OMEGA_6_TOTAL	omega_6_total	omega_6_total	6	60	2.75075	0.0786581
0.0338061	Longevity_PGS000906	oncostatin M	oncostatin m	oncostatin m	6	60	-2.70571	0.154269	OSM	ENSG00000099985	ENST00000215781	ENSP00000215781	P13725
0.0333219	Alzheimers_PGS002753	growth hormone 1	growth hormone 1	growth hormone 1	6	60	-2.62658	0.144188	GH1	ENSG00000259384	ENST00000351388,ENST00000458650,ENST00000323322	ENSP00000343791,ENSP00000408486,ENSP00000312673	P01241
0.0339559	Cardiovascular_disease_PGS002316	SLAM family member 7	slam family member 7	slam family member 7	6	60	-2.62314	0.131214	SLAMF7	ENSG00000026751	ENST00000368043,ENST00000368042	ENSP00000357022,ENSP00000357021	Q9NQ25
0.0345716	Type_2_diabetes_T2D_PGS004923	2-piperidinone	2-piperidinone	2-piperidinone	6	60	2.74188	0.0803621
0.0325531	Timmers_healthspan	N2,N2-dimethylguanosine	n2,n2-dimethylguanosine	n2,n2-dimethylguanosine	6	60	-2.63806	0.167743
0.0348578	Timmers_lifespan	glycocholenate sulfate*	glycocholenate sulfate*	glycocholenate sulfate*	6	60	2.61164	0.144641
0.0348837	Alzheimers_PGS002753	X - 11378	x - 11378	x - 11378	6	60	-2.66744	0.124285
0.0341895	amyotrophic_lateral_sclerosis	methyl glucopyranoside (alpha + beta)	methyl glucopyranoside(alpha+beta)	methyl glucopyranoside (alpha + beta)	6	60	-2.63272	0.113719
0.0348254	Alzheimer_disease_late_onset_PGS000053	quinolinate	quinolinate	quinolinate	6	60	-2.65524	0.113302
0.0329497	T2D_cases_vs_HbA1c_filtered_controls_PGS000712	behenoyl sphingomyelin (d18:1/22:0)*	behenoyl sphingomyelin (d18:1/22:0)*	SM(d18:1/22:0)	6	60	2.67918	0.123465
0.0353549	HDL_cholesterol_PGS002781	sphingomyelin (d17:2/16:0, d18:2/15:0)*	sphingomyelin (d17:2/16:0, d18:2/15:0)*	sphingomyelin (d17:2/16:0, d18:2/15:0)*	6	60	2.65394	0.123156
0.0351458	Direct_bilirubin_umol_L_PGS000681	VITAMIN D, 25-OH TOT	vitamin D	vitamin D	6	60	2.65211	0.143731
0.0364101	Coronary_atherosclerosis_PGS002048	arachidonoylcarnitine (C20:4)	arachidonoylcarnitine (c20:4)	arachidonoylcarnitine (c20:4)	6	60	-2.64055	0.115088
0.0367234	Cardiovascular_disease_PGS002316	natriuretic peptide B	natriuretic peptide b	natriuretic peptide b	6	60	-2.71175	0.0758401	NPPB	ENSG00000120937	ENST00000376468	ENSP00000365651	P16860
0.0366924	amyotrophic_lateral_sclerosis	interleukin 16	interleukin 16	interleukin 16	6	60	-2.65253	0.101506	IL16	ENSG00000172349	ENST00000394660,ENST00000302987,ENST00000394652	ENSP00000378155,ENSP00000302935,ENSP00000378147	Q14005
0.0367228	Alzheimer_disease_late_onset_PGS000053	5alpha-pregnan-3beta,20alpha-diol disulfate	5alpha-preg-3b,20a-diol MS	5Œ±-Preg-DS	6	60	-2.66715	0.102562
0.0374709	Coronary_atherosclerosis_PGS002048	OMEGA_3_TOTAL	omega_3_total	omega_3_total	6	60	2.64998	0.0911225
0.0370366	Alzheimer_disease_late_onset_PGS000053	CALCIUM	calcium	calcium	6	60	2.69818	0.0526341
0.0361857	T2D_cases_vs_HbA1c_filtered_controls_PGS000712	taurocholenate sulfate*	taurocholenate sulfate*	taurocholenate sulfate*	6	60	2.67318	0.0889265
0.0375428	Timmers_healthspan	2-aminoheptanoate	2-aminoheptanoate	2-aminoheptanoate	6	60	2.56465	0.10117
0.0385381	T2D_cases_vs_HbA1c_filtered_controls_PGS000712	CUB domain containing protein 1	cub domain containing protein 1	cub domain containing protein 1	6	60	-2.62902	0.0811912	CDCP1	ENSG00000163814	ENST00000296129,ENST00000425231	ENSP00000296129,ENSP00000399342	Q9H5V8
0.0390653	Alzheimers_PGS002753	docosahexaenoylcholine	docosahexaenoylcholine	docosahexaenoylcholine	6	60	2.62558	0.0697514
0.0390515	Longevity_PGS000906	lysine	lysine	lysine	6	60	2.57159	0.0890045
0.0416718	Timmers_healthspan	X - 15469	x - 15469	x - 15469	6	60	-2.56624	0.0536837
0.0152462	Parkinson_disease_PGS000903	2-naphthol sulfate	2-naphthol sulfate	2-naphthol sulfate	5	50	3.09699	0.360638
0.0162378	Cardiovascular_disease_PGS002316	maleate	maleate	maleate	5	50	-2.89864	0.385745
0.0192583	Coronary_atherosclerosis_PGS002048	X - 24522	x - 24522	x - 24522	5	50	2.84696	0.352024
0.0184777	amyotrophic_lateral_sclerosis	epithelial cell adhesion molecule	epithelial cell adhesion molecule	epithelial cell adhesion molecule	5	50	2.86719	0.32674	EPCAM	ENSG00000119888	ENST00000263735	ENSP00000263735	P16422
0.0212756	LDL_cholesterol_PGS003873	uracil	uracil	uracil	5	50	2.91283	0.272991
0.0216515	HDL_cholesterol_PGS002781	androsterone glucuronide	androsterone glucuronide	androsterone glucuronide	5	50	3.02303	0.245659
0.0218133	frailty	X - 12849	x - 12849	x - 12849	5	50	-2.72742	0.332075
0.0232842	Timmers_longevity	selectin P ligand	selectin p ligand	selectin p ligand	5	50	-2.9214	0.306535	SELPLG	ENSG00000110876	ENST00000550948,ENST00000228463,ENST00000388962	ENSP00000447752,ENSP00000228463,ENSP00000373614	Q14242
0.0216363	amyotrophic_lateral_sclerosis	X - 12849	x - 12849	x - 12849	5	50	2.8157	0.336102
0.0233602	Timmers_longevity	imidazole lactate	imidazole lactate	imidazole lactate	5	50	-2.7569	0.297238
0.0246184	Alzheimer_disease_late_onset_PGS000053	protease, serine, 8	protease, serine, 8	protease, serine, 8	5	50	-2.72052	0.295851	PRSS8	ENSG00000052344	ENST00000317508	ENSP00000319730	Q16651
0.0230411	HDL_cholesterol_PGS002781	chemokine (C-C motif) ligand 24	chemokine (c-c motif) ligand 24	chemokine (c-c motif) ligand 24	5	50	-2.79538	0.243039	CCL24	ENSG00000106178,ENSG00000262306	ENST00000222902,ENST00000416943,ENST00000573227,ENST00000576649	ENSP00000222902,ENSP00000400533,ENSP00000461512,ENSP00000461415	O00175
0.0248688	frailty	N-acetylglycine	n-acetylglycine	n-acetylglycine	5	50	2.76376	0.236702
0.0229278	Heart_failure_PGS001790	secretoglobin, family 3A, member 2	secretoglobin, family 3a, member 2	secretoglobin, family 3a, member 2	5	50	2.88533	0.219328	SCGB3A2	ENSG00000164265	ENST00000296694	ENSP00000296694	Q96PL1
0.0240959	Timmers_longevity	glycocholenate sulfate*	glycocholenate sulfate*	glycocholenate sulfate*	5	50	2.78671	0.232679
0.0258056	Parkinson_disease_PGS000903	N6,N6,N6-trimethyllysine	n6,n6,n6-trimethyllysine	n6,n6,n6-trimethyllysine	5	50	2.79646	0.249447
0.023491	Heart_failure_PGS001790	bone morphogenetic protein 6	bone morphogenetic protein 6	bone morphogenetic protein 6	5	50	-2.81176	0.270252	BMP6	ENSG00000153162	ENST00000283147	ENSP00000283147	P22004
0.0256636	Coronary_atherosclerosis_PGS002048	GLUCOSE	glucose	glucose	5	50	0.641221	3.02315
0.0242311	Type_2_diabetes_SNPs_insulin_action_secretion_PGS000851	X - 12100	x - 12100	x - 12100	5	50	2.79537	0.297871
0.0266639	Timmers_lifespan	X - 21829	x - 21829	x - 21829	5	50	2.76462	0.214025
0.0268133	Alzheimers_PGS002753	salicylate	salicylate	salicylate	5	50	2.71217	0.238758
0.02758	Coronary_vascular_disease_CVD_PGS004514	3-formylindole	3-formylindole	3-formylindole	5	50	-2.73605	0.225629
0.0253881	Type_2_diabetes_SNPs_insulin_action_secretion_PGS000851	V-set and immunoglobulin domain containing 2	v-set igg domain containing 2	v-set and immunoglobulin domain containing 2	5	50	2.66338	0.235111	VSIG2	ENSG00000019102	ENST00000326621,ENST00000403470	ENSP00000318684,ENSP00000385013	Q96IQ7
0.025986	LDL_cholesterol_PGS003873	DPA	dpa	dpa	5	50	-2.77452	0.188355
0.0258977	Alzheimer_disease_late_onset_PGS000053	hydroxy-CMPF*	hydroxy-cmpf*	hydroxy-cmpf*	5	50	-2.86215	0.127148
0.0275892	LDL_cholesterol_PGS003873	N6-carbamoylthreonyladenosine	n6-carbamoylthreonyladenosine	n6-carbamoylthreonyladenosine	5	50	2.68135	0.245145
0.0261059	frailty	phosphatidylcholine (14:0/14:0, 16:0/12:0)	phosphatidylcholine (14:0/14:0, 16:0/12:0)	PC(14:0/14:0,16:0/12:0)	5	50	2.8033	0.17692
0.0286389	Timmers_longevity	(S)-a-amino-omega-caprolactam	(s)-a-amino-omega-caprolactam	(s)-a-amino-omega-caprolactam	5	50	-2.77424	0.190361
0.0283515	Alzheimer_disease_late_onset_PGS000053	X - 12729	x - 12729	x - 12729	5	50	-2.81529	0.18804
0.0281117	Alzheimers_PGS002753	interleukin 10	interleukin 10	interleukin 10	5	50	-2.82266	0.160764	IL10	ENSG00000136634	ENST00000423557	ENSP00000412237	P22301
0.0281117	Alzheimers_PGS002753	interleukin 10	interleukin 10	interleukin 10	5	50	-2.82266	0.160764	IL10	ENSG00000136634	ENST00000423557	ENSP00000412237	P22301
0.0264662	Timmers_healthspan	X - 23739	x - 23739	x - 23739	5	50	-2.84714	0.172804
0.0289174	Timmers_healthspan	cinnamoylglycine	cinnamoylglycine	cinnamoylglycine	5	50	2.81493	0.210199
0.0268455	Cardiovascular_disease_PGS002316	X - 12462	x - 12462	x - 12462	5	50	-2.75749	0.235173
0.0302784	Timmers_longevity	X - 16580	x - 16580	x - 16580	5	50	-2.66661	0.183413
0.0305136	frailty	dehydroepiandrosterone sulfate (DHEA-S)	dehydroepiandrosterone sulfate (dhea-s)	dehydroepiandrosterone sulfate (dhea-s)	5	50	-2.63287	0.21518
0.0308098	Coronary_vascular_disease_CVD_PGS004514	heparan sulfate proteoglycan 2	heparan sulfate proteoglycan 2	heparan sulfate proteoglycan 2	5	50	2.74315	0.191874	HSPG2	ENSG00000142798	ENST00000374695	ENSP00000363827	P98160
0.0287205	Alzheimer_disease_late_onset_PGS000053	2-oleoyl-GPE (18:1)*	2-oleoyl-gpe (18:1)*	2-oleoyl-gpe (18:1)*	5	50	-2.71254	0.187315
0.0291915	Type_2_diabetes_SNPs_insulin_action_PGS000850	octadecadienedioate (C18:2-DC)*	octadecadienedioate (c18:2-dc)*	octadecadienedioate (c18:2-dc)*	5	50	-2.66001	0.189653
0.0303827	Longevity_PGS000906	N-acetylmethionine	n-acetylmethionine	n-acetylmethionine	5	50	2.61323	0.215898
0.0312957	Timmers_lifespan	X - 13728	x - 13728	x - 13728	5	50	-2.68164	0.166364
0.0311743	Alzheimer_disease_late_onset_PGS000053	X - 21286	x - 21286	x - 21286	5	50	2.73515	0.167666
0.0292703	LDL_cholesterol_PGS003873	X - 11795	x - 11795	x - 11795	5	50	2.71717	0.133779
0.0312767	Coronary_atherosclerosis_PGS002048	X - 23590	x - 23590	x - 23590	5	50	2.79274	0.188214
0.0313964	Longevity_PGS000906	LDL SMALL	ldl small	ldl small	5	50	2.6805	0.169896
0.032016	Coronary_artery_disease_PGS004941	interleukin 1, alpha	interleukin 1, alpha	IL1A	5	50	-2.69183	0.213835	IL1A	ENSG00000115008	ENST00000263339	ENSP00000263339	P01583
0.0301501	HDL_cholesterol_PGS002781	1-palmitoyl-2-eicosapentaenoyl-GPC (16:0/20:5)*	1-palmitoyl-2-eicosapentaenoyl-gpc (16:0/20:5)*	GPC(16:0/20:5)	5	50	2.68974	0.186272
0.0321107	mvAge	X - 13431	x - 13431	x - 13431	5	50	2.7398	0.104307
0.0304906	HDL_cholesterol_PGS002781	ornithine	ornithine	ornithine	5	50	-2.67964	0.139859
0.0301898	frailty	arachidonoylcarnitine (C20:4)	arachidonoylcarnitine (c20:4)	arachidonoylcarnitine (c20:4)	5	50	2.75665	0.138543
0.0325477	HDL_cholesterol_PGS002781	dopamine 3-O-sulfate	dopamine 3-o-sulfate	dopamine 3-o-sulfate	5	50	-2.72456	0.139506
0.0329185	Longevity_PGS000906	X - 23587	x - 23587	x - 23587	5	50	-2.7253	0.146739
0.0314116	Type_2_diabetes_T2D_PGS004923	4-ethylphenylsulfate	4-et-phenylsulfate	4-ethylphenylsulfate	5	50	-2.69221	0.148247
0.0319752	Coronary_atherosclerosis_PGS002048	2-stearoyl-GPE (18:0)*	2-stearoyl-gpe (18:0)*	2-stearoyl-gpe (18:0)*	5	50	2.69106	0.141946
0.0342638	LDL_cholesterol_PGS003873	alpha-ketoglutarate	alpha-ketoglutarate	alpha-ketoglutarate	5	50	2.69374	0.12172
0.0344747	Alzheimer_disease_late_onset_PGS000053	surfactant protein D	surfactant protein d	surfactant protein d	5	50	2.75677	0.0890308	SFTPD	ENSG00000133661	ENST00000372292	ENSP00000361366	P35247
0.0343281	T2D_cases_vs_HbA1c_filtered_controls_PGS000712	TEK tyrosine kinase, endothelial	tek tyrosine kinase, endothelial	tek tyrosine kinase, endothelial	5	50	2.65	0.133644	TEK	ENSG00000120156	ENST00000519097,ENST00000380036,ENST00000406359	ENSP00000430686,ENSP00000369375,ENSP00000383977	Q02763
0.0325433	Heart_failure_PGS001790	cholesterol	cholesterol	cholesterol	5	50	-2.59868	0.151342
0.034796	HDL_cholesterol_PGS002781	1-arachidonoyl-GPI (20:4)*	1-arachidonoyl-gpi (20:4)*	1-arachidonoyl-gpi (20:4)*	5	50	-2.56343	0.157073
0.0329048	Coronary_artery_disease_PGS004941	X - 23590	x - 23590	x - 23590	5	50	2.74379	0.125262
0.0343177	Alzheimers_PGS002753	SLAM family member 7	slam family member 7	slam family member 7	5	50	-2.61382	0.150119	SLAMF7	ENSG00000026751	ENST00000368043,ENST00000368042	ENSP00000357022,ENSP00000357021	Q9NQ25
0.0334551	T2D_cases_vs_HbA1c_filtered_controls_PGS000712	1-carboxyethylvaline	1-carboxyethylvaline	1-carboxyethylvaline	5	50	-2.67962	0.141508
0.0335291	frailty	interleukin 5 (colony-stimulating factor, eosinophil)	interleukin 5	IL5	5	50	2.6618	0.151077	IL5	ENSG00000113525	ENST00000231454	ENSP00000231454	P05113
0.0335291	frailty	interleukin 5 (colony-stimulating factor, eosinophil)	interleukin 5	IL5	5	50	2.6618	0.151077	IL5	ENSG00000113525	ENST00000231454	ENSP00000231454	P05113
0.035771	Longevity_PGS000906	matrix metallopeptidase 1 (interstitial collagenase)	interstitial collagenase	matrix metallopeptidase 1 (interstitial collagenase)	5	50	-2.64355	0.114433	MMP1	ENSG00000196611	ENST00000315274	ENSP00000322788	P03956
0.0357618	Longevity_PGS000906	1-(1-enyl-palmitoyl)-2-docosahexaenoyl-GPC (P-16:0/22:6)*	1-(1-enyl-palmitoyl)-2-docosahexaenoyl-gpc (p-16:0/22:6)*	1-(1-enyl-palmitoyl)-2-docosahexaenoyl-gpc (p-16:0/22:6)*	5	50	-2.69596	0.12398
0.0358424	Timmers_lifespan	glial cell derived neurotrophic factor	glial cell derived neurotrophic factor	glial cell derived neurotrophic factor	5	50	-2.63817	0.135655	GDNF	ENSG00000168621	ENST00000326524,ENST00000381826,ENST00000427982,ENST00000515058,ENST00000510177,ENST00000502572,ENST00000344622	ENSP00000317145,ENSP00000371248,ENSP00000409007,ENSP00000425928,ENSP00000424592,ENSP00000423557,ENSP00000339703	P39905
0.0358424	Timmers_lifespan	glial cell derived neurotrophic factor	glial cell derived neurotrophic factor	glial cell derived neurotrophic factor	5	50	-2.63817	0.135655	GDNF	ENSG00000168621	ENST00000326524,ENST00000381826,ENST00000427982,ENST00000515058,ENST00000510177,ENST00000502572,ENST00000344622	ENSP00000317145,ENSP00000371248,ENSP00000409007,ENSP00000425928,ENSP00000424592,ENSP00000423557,ENSP00000339703	P39905
0.0358558	Parkinson_disease_PGS000903	5-dodecenoate (12:1n7)	5-dodecenoate (12:1n7)	5-dodecenoate (12:1n7)	5	50	2.64504	0.12218
0.0341513	amyotrophic_lateral_sclerosis	ximenoylcarnitine (C26:1)*	ximenoylcarnitine (c26:1)*	ximenoylcarnitine (c26:1)*	5	50	-2.59543	0.120595
0.0354926	Type_2_diabetes_SNPs_insulin_action_secretion_PGS000851	X - 12411	x - 12411	x - 12411	5	50	2.70447	0.124433
0.0360172	mvAge	sulfate of piperine metabolite C16H19NO3 (3)*	sulfate of piperine metabolite c16h19no3 (3)*	sulfate of piperine metabolite c16h19no3 (3)*	5	50	-2.73733	0.0559933
0.0367164	Timmers_longevity	dihomo-linoleoylcarnitine (C20:2)*	dihomo-linoleoylcarnitine (c20:2)*	dihomo-linoleoylcarnitine (c20:2)*	5	50	2.57066	0.148153
0.0362068	Direct_bilirubin_umol_L_PGS000681	X - 15666	x - 15666	x - 15666	5	50	-2.69731	0.0898708
0.0369728	Coronary_vascular_disease_CVD_PGS004514	tyrosine	tyrosine	tyrosine	5	50	2.67856	0.10328
0.0369167	Coronary_atherosclerosis_PGS002048	GGT	ggt	ggt	5	50	2.62131	0.111261
0.0361269	mvAge	(R)-3-hydroxybutyrylcarnitine	(r)-3-hydroxybutyrylcarnitine	(r)-3-hydroxybutyrylcarnitine	5	50	-2.5665	0.13038
0.0368633	Timmers_lifespan	chemokine (C motif) ligand 1	chemokine (c motif) ligand 1	chemokine (c motif) ligand 1	5	50	-2.59598	0.11059	XCL1	ENSG00000143184	ENST00000367818	ENSP00000356792	P47992
0.0351082	Type_2_diabetes_SNPs_insulin_action_secretion_PGS000851	glycosyl ceramide (d18:2/24:1, d18:1/24:2)*	glycosyl ceramide (d18:2/24:1, d18:1/24:2)*	glycosyl ceramide (d18:2/24:1, d18:1/24:2)*	5	50	-2.58923	0.121538
0.0353017	LDL_cholesterol_PGS003873	4-hydroxy-2-oxoglutaric acid	4-hydroxy-2-oxoglutaric acid	4-hydroxy-2-oxoglutaric acid	5	50	2.61162	0.119121
0.0369712	Timmers_lifespan	carboxypeptidase A1 (pancreatic)	carboxypeptidase a1 (pancreatic)	carboxypeptidase a1 (pancreatic)	5	50	-2.69084	0.0856267	CPA1	ENSG00000264509,ENSG00000091704	ENST00000579597,ENST00000011292	ENSP00000462830,ENSP00000011292	P15085
0.0370236	mvAge	interleukin 17D	interleukin 17d	IL17D	5	50	2.59921	0.112516	IL17D	ENSG00000172458	ENST00000304920	ENSP00000302924	Q8TAD2
0.0359371	Coronary_artery_disease_PGS004941	2-hydroxyoctanoate	2-hydroxyoctanoate	2-hydroxyoctanoate	5	50	2.62155	0.0937085
0.0377983	Timmers_healthspan	homocitrulline	homocitrulline	homocitrulline	5	50	-2.64415	0.109441
0.0373355	Timmers_longevity	matrix metallopeptidase 7 (matrilysin, uterine)	matrix metallopeptidase 7	matrix metallopeptidase 7 (matrilysin, uterine)	5	50	2.57817	0.0994119	MMP7	ENSG00000137673	ENST00000260227	ENSP00000260227	P09237
0.0383923	Coronary_atherosclerosis_PGS002048	cystatin D	cystatin d	cystatin d	5	50	2.63294	0.074807	CST5	ENSG00000170367	ENST00000304710	ENSP00000307132	P28325
0.0380313	mvAge	3-bromo-5-chloro-2,6-dihydroxybenzoic acid*	3-bromo-5-chloro-2,6-dihydroxybenzoic acid*	3-bromo-5-chloro-2,6-dihydroxybenzoic acid*	5	50	2.61548	0.116979
0.039219	Coronary_artery_disease_PGS004941	cyclo(pro-val)	cyclo(pro-val)	cyclo(pro-val)	5	50	2.54927	0.105939
0.0393165	Alzheimers_PGS002753	dimethylarginine (SDMA + ADMA)	dimethylarginine (sdma + adma)	dimethylarginine (sdma + adma)	5	50	2.63832	0.0515822
0.0396771	T2D_cases_vs_HbA1c_filtered_controls_PGS000712	thrombopoietin	thrombopoietin	thrombopoietin	5	50	2.60967	0.105877	THPO	ENSG00000090534	ENST00000204615,ENST00000445696	ENSP00000204615,ENSP00000410763	P40225
0.0399705	Timmers_healthspan	3-(4-hydroxyphenyl)lactate	3-(4-OHphenyl)lactate	3-(4-hydroxyphenyl)lactate	5	50	-2.60322	0.0765281
0.0398746	HDL_cholesterol_PGS002781	stachydrine	stachydrine	stachydrine	5	50	2.56111	0.0865344
0.040631	Type_2_diabetes_SNPs_insulin_action_secretion_PGS000851	choline	choline	choline	5	50	2.5741	0.06837
0.0392192	Timmers_longevity	adenine	adenine	adenine	5	50	-2.6282	0.0414284
0.0408735	Alzheimer_disease_late_onset_PGS000053	gamma-glutamylisoleucine*	gamma-glutamylisoleucine*	gamma-glutamylisoleucine*	5	50	-2.59629	0.0891897
0.040164	Coronary_atherosclerosis_PGS002048	1-palmitoleoyl-2-linolenoyl-GPC (16:1/18:3)*	1-palm-2-lino-gpc(16:1/18:3)*	1-palmitoleoyl-2-linolenoyl-gpc (16:1/18:3)*	5	50	2.53197	0.075534
0.0421227	frailty	selectin P ligand	selectin p ligand	selectin p ligand	5	50	-2.58328	0.0657092	SELPLG	ENSG00000110876	ENST00000550948,ENST00000228463,ENST00000388962	ENSP00000447752,ENSP00000228463,ENSP00000373614	Q14242
0.0438132	Alzheimers_PGS002753	1-(1-enyl-stearoyl)-2-oleoyl-GPE (P-18:0/18:1)	1-(1-enyl-stearoyl)-2-oleoyl-gpe (p-18:0/18:1)	1-(1-enyl-stearoyl)-2-oleoyl-gpe (p-18:0/18:1)	5	50	2.51739	0.0515873
0.0451569	Parkinson_disease_PGS000903	5-methyluridine (ribothymidine)	5-methyluridine (ribothymidine)	5-methyluridine (ribothymidine)	5	50	-2.52467	0.0560468
0.0183558	Timmers_lifespan	erythritol	erythritol	erythritol	4	40	-2.97764	0.341144
0.0192405	Alzheimer_disease_late_onset_PGS000053	1-stearyl-2-docosapentaenoyl-GPC (O-18:0/22:5n3)*	1-stearyl-2-docosapentaenoyl-gpc (o-18:0/22:5n3)*	GPC(o-18:0/22:5n3)	4	40	-2.99866	0.307426
0.0208552	Type_2_diabetes_SNPs_insulin_action_secretion_PGS000851	hydantoin-5-propionate	hydantoin-5-propionate	hydantoin-5-propionate	4	40	3.0462	0.354038
0.022324	frailty	mannitol/sorbitol	mannitol/sorbitol	mannitol/sorbitol	4	40	2.98476	0.219343
0.0243867	Timmers_lifespan	X - 21736	x - 21736	x - 21736	4	40	2.8108	0.261477
0.0251694	Alzheimer_disease_late_onset_PGS000053	adenosine deaminase	adenosine deaminase	adenosine deaminase	4	40	-2.79527	0.29168	ADA	ENSG00000196839	ENST00000372874	ENSP00000361965	P00813
0.0252395	Timmers_longevity	BUN/CREAT RATIO	bun/creat ratio	bun/creat ratio	4	40	-2.76904	0.270531
0.0259713	Parkinson_disease_PGS000903	trans-4-hydroxyproline	trans-4-hydroxyproline	trans-4-hydroxyproline	4	40	2.78608	0.298923
0.0246399	Alzheimers_PGS002753	N-acetylglucosamine/N-acetylgalactosamine	n-acetylglucosamine/n-acetylgalactosamine	GlcNAc_GalNAc	4	40	2.74087	0.274631
0.0255481	Type_2_diabetes_SNPs_insulin_action_secretion_PGS000851	neurturin	neurturin	neurturin	4	40	-2.81075	0.212586	NRTN	ENSG00000171119	ENST00000303212	ENSP00000302648	Q99748
0.0278844	Direct_bilirubin_umol_L_PGS000681	metabolonic lactone sulfate	metabolonic lactone sulfate	metabolonic lactone sulfate	4	40	-2.68917	0.262226
0.02794	Timmers_lifespan	natriuretic peptide B	natriuretic peptide b	natriuretic peptide b	4	40	2.67585	0.246032	NPPB	ENSG00000120937	ENST00000376468	ENSP00000365651	P16860
0.0283925	Coronary_atherosclerosis_PGS002048	selectin E	selectin e	selectin e	4	40	-2.74766	0.206512	SELE	ENSG00000007908	ENST00000333360	ENSP00000331736	P16581
0.0281394	Coronary_atherosclerosis_PGS002048	CRP HIGH SENSITIVITY	crp high sensitivity	crp high sensitivity	4	40	2.72013	0.220388
0.0270764	Parkinson_disease_PGS000903	gamma-glutamylglycine	gamma-glutamylglycine	gamma-glutamylglycine	4	40	-2.67244	0.233753
0.0289931	Type_2_diabetes_SNPs_insulin_action_secretion_PGS000851	phosphate	phosphate	phosphate	4	40	2.71298	0.260925
0.0282117	Alzheimer_disease_late_onset_PGS000053	N-acetylhistidine	n-acetylhistidine	n-acetylhistidine	4	40	2.80619	0.169769
0.0284447	HDL_cholesterol_PGS002781	1-palmityl-2-palmitoyl-GPC (O-16:0/16:0)*	1-palmityl-2-palmitoyl-gpc (o-16:0/16:0)*	1-palmityl-2-palmitoyl-gpc (o-16:0/16:0)*	4	40	2.67589	0.210734
0.0302116	mvAge	3,5-dichloro-2,6-dihydroxybenzoic acid	3,5-dichloro-2,6-dihydroxybenzoic acid	3,5-dichloro-2,6-dihydroxybenzoic acid	4	40	2.76506	0.156661
0.0302739	frailty	4-ethylphenylsulfate	4-et-phenylsulfate	4-ethylphenylsulfate	4	40	-2.79759	0.127734
0.0311734	Alzheimer_disease_late_onset_PGS000053	5,6-dihydrouridine	5,6-dihydrouridine	5,6-dihydrouridine	4	40	2.75255	0.144037
0.030849	T2D_cases_vs_HbA1c_filtered_controls_PGS000712	interleukin 13	interleukin 13	interleukin 13	4	40	-2.75044	0.174138	IL13	ENSG00000169194	ENST00000304506	ENSP00000304915	P35225
0.0308646	Parkinson_disease_PGS000903	epithelial cell adhesion molecule	epithelial cell adhesion molecule	epithelial cell adhesion molecule	4	40	-2.6947	0.186682	EPCAM	ENSG00000119888	ENST00000263735	ENSP00000263735	P16422
0.0317115	Longevity_PGS000906	3-methylxanthine	3-methylxanthine	3-methylxanthine	4	40	-2.64291	0.199918
0.02966	Timmers_longevity	X - 23997	x - 23997	x - 23997	4	40	2.64454	0.206817
0.0305542	Timmers_lifespan	pro-hydroxy-pro	pro-hydroxy-pro	pro-hydroxy-pro	4	40	2.71794	0.186053
0.0308833	Alzheimers_PGS002753	pyridoxate	pyridoxate	pyridoxate	4	40	-2.62783	0.18413
0.0311169	T2D_cases_vs_HbA1c_filtered_controls_PGS000712	X - 12729	x - 12729	x - 12729	4	40	2.68927	0.232212
0.0318436	Timmers_lifespan	tumor necrosis factor receptor superfamily, member 10a	tnf receptor superfamily, member 10a	TNFRSF10A	4	40	-2.60805	0.183132	TNFRSF10A	ENSG00000104689	ENST00000221132	ENSP00000221132	O00220
0.0318436	Timmers_lifespan	tumor necrosis factor receptor superfamily, member 10a	tnf receptor superfamily, member 10a	TNFRSF10A	4	40	-2.60805	0.183132	TNFRSF10A	ENSG00000104689	ENST00000221132	ENSP00000221132	O00220
0.033334	mvAge	delta-like 1 homolog (Drosophila)	delta-like 1 homolog (drosophila)	delta-like 1 homolog (drosophila)	4	40	2.64908	0.164985	DLK1	ENSG00000185559	ENST00000341267,ENST00000331224	ENSP00000340292,ENSP00000331081	P80370
0.0340188	T2D_cases_vs_HbA1c_filtered_controls_PGS000712	stearoyl sphingomyelin (d18:1/18:0)	stearoyl sphingomyelin (d18:1/18:0)	stearoyl sphingomyelin (d18:1/18:0)	4	40	2.78888	0.0892797
0.0335395	Parkinson_disease_PGS000903	octadecadienedioate (C18:2-DC)*	octadecadienedioate (c18:2-dc)*	octadecadienedioate (c18:2-dc)*	4	40	2.7044	0.189268
0.0321077	Alzheimer_disease_late_onset_PGS000053	aconitate [cis or trans]	aconitate [cis or trans]	aconitate [cis or trans]	4	40	2.60572	0.191006
0.0339631	Type_2_diabetes_SNPs_insulin_action_PGS000850	2-hydroxyhippurate (salicylurate)	2-hydroxyhippurate	2-hydroxyhippurate (salicylurate)	4	40	2.65911	0.189754
0.0326123	Type_2_diabetes_SNPs_insulin_action_PGS000850	indolepropionate	indolepropionate	indolepropionate	4	40	-2.66226	0.134903
0.0343819	Type_2_diabetes_SNPs_insulin_action_secretion_PGS000851	erucate (22:1n9)	erucate (22:1n9)	erucate (22:1n9)	4	40	-2.64647	0.192135
0.0329945	HDL_cholesterol_PGS002781	LDL PARTICLE NUMBER	ldl particle number	ldl particle number	4	40	-2.67971	0.124311
0.0348981	Coronary_artery_disease_PGS004941	1-palmitoyl-2-oleoyl-GPI (16:0/18:1)*	1-palmitoyl-2-oleoyl-gpi (16:0/18:1)*	1-palmitoyl-2-oleoyl-gpi (16:0/18:1)*	4	40	-2.61765	0.149591
0.0351639	Coronary_artery_disease_PGS004941	stachydrine	stachydrine	stachydrine	4	40	-2.62954	0.134336
0.0350589	Timmers_healthspan	etiocholanolone glucuronide	etiocholanolone glucuronide	etiocholanolone glucuronide	4	40	-2.6309	0.160393
0.0337725	Direct_bilirubin_umol_L_PGS000681	mannitol/sorbitol	mannitol/sorbitol	mannitol/sorbitol	4	40	2.65493	0.14298
0.033454	amyotrophic_lateral_sclerosis	decadienedioic acid (C10:2-DC)**	decadienedioic acid (c10:2-dc)**	decadienedioic acid (c10:2-dc)**	4	40	2.73928	0.12815
0.035259	Alzheimer_disease_late_onset_PGS000053	platelet and endothelial cell adhesion molecule 1	platelet and endothelial cell adhesion molecule 1	PECAM1	4	40	2.63212	0.172814	PECAM1	ENSG00000261371	ENST00000563924	ENSP00000457421	P16284
0.0361492	frailty	glycerol	glycerol	glycerol	4	40	-2.6279	0.116773
0.0343662	HDL_cholesterol_PGS002781	1-(1-enyl-palmitoyl)-2-oleoyl-GPC (P-16:0/18:1)*	1-(1-enyl-palmitoyl)-2-oleoyl-gpc (p-16:0/18:1)*	GPC(p-16:0/18:1)	4	40	2.68059	0.106195
0.0365789	Timmers_healthspan	X - 18913	x - 18913	x - 18913	4	40	2.59815	0.136109
0.0369981	Parkinson_disease_PGS000903	glycerate	glycerate	glycerate	4	40	-2.68357	0.123706
0.0351329	Type_2_diabetes_SNPs_insulin_action_secretion_PGS000851	growth differentiation factor 2	growth differentiation factor 2	growth differentiation factor 2	4	40	-2.63866	0.103203	GDF2	ENSG00000128802,ENSG00000263761	ENST00000249598,ENST00000581492	ENSP00000249598,ENSP00000463051	Q9UK05
0.0370424	Alzheimer_disease_late_onset_PGS000053	hydroxyacid oxidase (glycolate oxidase) 1	hydroxyacid oxidase (glycolate oxidase) 1	HAO1	4	40	2.65034	0.108401	HAO1	ENSG00000101323	ENST00000378789	ENSP00000368066	Q9UJM8
0.0366046	frailty	dihomo-linoleoylcarnitine (C20:2)*	dihomo-linoleoylcarnitine (c20:2)*	dihomo-linoleoylcarnitine (c20:2)*	4	40	2.60519	0.168233
0.0366703	LDL_cholesterol_PGS003873	succinylcarnitine (C4-DC)	succinylcarnitine (c4-dc)	succinylcarnitine (c4-dc)	4	40	2.61176	0.130905
0.0368275	Timmers_healthspan	CD5 molecule	cd5 molecule	cd5 molecule	4	40	2.59269	0.128184	CD5	ENSG00000110448	ENST00000347785	ENSP00000342681	P06127
0.0355189	Type_2_diabetes_SNPs_insulin_action_PGS000850	CALCIUM	calcium	calcium	4	40	-2.60433	0.125795
0.0376859	Timmers_healthspan	glucuronate	glucuronate	glucuronate	4	40	2.64644	0.109049
0.0358566	frailty	chemokine (C-X-C motif) ligand 11	chemokine (c-x-c motif) ligand 11	chemokine (c-x-c motif) ligand 11	4	40	2.59581	0.141363	CXCL11	ENSG00000169248	ENST00000306621,ENST00000503860	ENSP00000306884,ENSP00000425819	O14625
0.0378357	Type_2_diabetes_SNPs_insulin_action_PGS000850	fibroblast growth factor 19	fibroblast growth factor 19	fibroblast growth factor 19	4	40	2.59927	0.116882	FGF19	ENSG00000162344	ENST00000294312	ENSP00000294312	O95750
0.0377336	Coronary_atherosclerosis_PGS002048	6-hydroxyindole sulfate	6-hydroxyindole sulfate	6-hydroxyindole sulfate	4	40	-2.64277	0.0911558
0.0377585	LDL_cholesterol_PGS003873	X - 17676	x - 17676	x - 17676	4	40	-2.59162	0.123143
0.0382679	Heart_failure_PGS001790	uridine	uridine	uridine	4	40	-2.61199	0.101067
0.0362328	T2D_cases_vs_HbA1c_filtered_controls_PGS000712	interleukin 20	interleukin 20	IL20	4	40	-2.59877	0.105356	IL20	ENSG00000162891	ENST00000367098,ENST00000367096	ENSP00000356065,ENSP00000356063	Q9NYY1
0.0366886	Alzheimers_PGS002753	myristoyl dihydrosphingomyelin (d18:0/14:0)*	myristoyl dihydrosphingomyelin (d18:0/14:0)*	SM(d18:0/14:0)	4	40	-2.58672	0.131719
0.0384896	Type_2_diabetes_SNPs_insulin_action_PGS000850	linolenate [alpha or gamma; (18:3n3 or 6)]	linolenate [alpha or gamma; (18:3n3 or 6)]	linolenate [alpha or gamma; (18:3n3 or 6)]	4	40	-2.63819	0.0705888
0.0387892	Alzheimer_disease_late_onset_PGS000053	citrate	citrate	citrate	4	40	2.61034	0.0961698
0.0388146	frailty	androsterone glucuronide	androsterone glucuronide	androsterone glucuronide	4	40	-2.63363	0.113786
0.0388373	Coronary_vascular_disease_CVD_PGS004514	proline/arginine-rich end leucine-rich repeat protein	proline/arginine-rich end leucine-rich repeat protein	PRELP	4	40	2.60329	0.115926	PRELP	ENSG00000188783	ENST00000343110	ENSP00000343924	P51888
0.0367025	HDL_cholesterol_PGS002781	N-methylproline	n-methylproline	n-methylproline	4	40	2.62036	0.115004
0.0388644	Coronary_vascular_disease_CVD_PGS004514	LINOLEIC_ACID	linoleic_acid	linoleic_acid	4	40	2.61327	0.104764
0.0391731	Parkinson_disease_PGS000903	2-hydroxyoctanoate	2-hydroxyoctanoate	2-hydroxyoctanoate	4	40	-2.5978	0.122707
0.039572	Alzheimer_disease_late_onset_PGS000053	N4-acetylcytidine	n4-acetylcytidine	n4-acetylcytidine	4	40	2.53462	0.122873
0.039719	Type_2_diabetes_SNPs_insulin_action_secretion_PGS000851	heparin-binding EGF-like growth factor	heparin-binding egf-like growth factor	heparin-binding egf-like growth factor	4	40	2.61044	0.0770136	HBEGF	ENSG00000113070	ENST00000230990,ENST00000507104	ENSP00000230990,ENSP00000425696	Q99075
0.0381783	Coronary_artery_disease_PGS004941	X - 11787	x - 11787	x - 11787	4	40	-2.56676	0.0980292
0.0382177	Alzheimers_PGS002753	V-set and immunoglobulin domain containing 2	v-set igg domain containing 2	v-set and immunoglobulin domain containing 2	4	40	2.59405	0.115814	VSIG2	ENSG00000019102	ENST00000326621,ENST00000403470	ENSP00000318684,ENSP00000385013	Q96IQ7
0.0396433	HDL_cholesterol_PGS002781	interleukin 17C	interleukin 17c	interleukin 17c	4	40	2.60803	0.0998108	IL17C	ENSG00000124391	ENST00000244241	ENSP00000244241	Q9P0M4
0.0400612	Alzheimer_disease_late_onset_PGS000053	secretoglobin, family 3A, member 2	secretoglobin, family 3a, member 2	secretoglobin, family 3a, member 2	4	40	-2.57273	0.089086	SCGB3A2	ENSG00000164265	ENST00000296694	ENSP00000296694	Q96PL1
0.0379173	Timmers_healthspan	X - 23590	x - 23590	x - 23590	4	40	-2.63245	0.0900324
0.0404646	Coronary_atherosclerosis_PGS002048	1-pentadecanoyl-2-linoleoyl-GPC (15:0/18:2)*	1-pentadecanoyl-2-linoleoyl-gpc (15:0/18:2)*	GPC(15:0/18:2)	4	40	2.64416	0.0365902
0.0386358	amyotrophic_lateral_sclerosis	chemokine (C-C motif) ligand 28	chemokine (c-c motif) ligand 28	chemokine (c-c motif) ligand 28	4	40	2.58962	0.0874711	CCL28	ENSG00000151882	ENST00000489442,ENST00000361115,ENST00000537013	ENSP00000426424,ENSP00000354416,ENSP00000443823	Q9NRJ3
0.0401121	mvAge	etiocholanolone glucuronide	etiocholanolone glucuronide	etiocholanolone glucuronide	4	40	-2.56123	0.107896
0.040182	HDL_cholesterol_PGS002781	selectin E	selectin e	selectin e	4	40	-2.61785	0.0627614	SELE	ENSG00000007908	ENST00000333360	ENSP00000331736	P16581
0.0405463	mvAge	WEIGHT_CALC	weight_calc	weight_calc	4	40	2.58867	0.0805969
0.0404686	Timmers_longevity	CD274 molecule	cd274 molecule	cd274 molecule	4	40	2.60193	0.0716183	CD274	ENSG00000120217	ENST00000381577,ENST00000381573	ENSP00000370989,ENSP00000370985	Q9NZQ7
0.0387921	Timmers_longevity	integrin, beta 2 (complement component 3 receptor 3 and 4 subunit)	integrin, beta 2 (complement component 3 receptor 3 and 4 subunit)	integrin, beta 2 (complement component 3 receptor 3 and 4 subunit)	4	40	-2.55134	0.128181	ITGB2	ENSG00000160255	ENST00000397852,ENST00000397857,ENST00000355153,ENST00000397850,ENST00000302347	ENSP00000380950,ENSP00000380955,ENSP00000347279,ENSP00000380948,ENSP00000303242	P05107
0.0403919	Alzheimers_PGS002753	X - 11483	x - 11483	x - 11483	4	40	2.59709	0.0795056
0.0383816	Timmers_healthspan	1,7-dimethylurate	1,7-dimethylurate	1,7-dimethylurate	4	40	-2.5743	0.076768
0.040817	amyotrophic_lateral_sclerosis	cathepsin L	cathepsin l	cathepsin l	4	40	2.54708	0.0928542	CTSL	ENSG00000135047	ENST00000343150,ENST00000340342	ENSP00000345344,ENSP00000365061	P07711
0.0397314	HDL_cholesterol_PGS002781	interleukin 16	interleukin 16	interleukin 16	4	40	-2.62587	0.0348476	IL16	ENSG00000172349	ENST00000394660,ENST00000302987,ENST00000394652	ENSP00000378155,ENSP00000302935,ENSP00000378147	Q14005
0.0399225	Alzheimer_disease_late_onset_PGS000053	X - 21736	x - 21736	x - 21736	4	40	-2.56155	0.0647088
0.0417063	mvAge	HDL PARTICLE NUMBER	hdl particle number	hdl particle number	4	40	2.58661	0.0749619
0.042111	Cardiovascular_disease_PGS002316	chemokine (C-C motif) ligand 16	chemokine (c-c motif) ligand 16	chemokine (c-c motif) ligand 16	4	40	-2.54132	0.0712813	CCL16	ENSG00000161573	ENST00000293275	ENSP00000293275	O15467
0.0422544	LDL_cholesterol_PGS003873	chemokine (C-C motif) ligand 24	chemokine (c-c motif) ligand 24	chemokine (c-c motif) ligand 24	4	40	2.5737	0.056487	CCL24	ENSG00000106178,ENSG00000262306	ENST00000222902,ENST00000416943,ENST00000573227,ENST00000576649	ENSP00000222902,ENSP00000400533,ENSP00000461512,ENSP00000461415	O00175
0.0428246	Timmers_lifespan	pentraxin 3, long	pentraxin 3, long	pentraxin 3, long	4	40	-2.5615	0.055285	PTX3	ENSG00000163661	ENST00000295927	ENSP00000295927	P26022
0.0430929	mvAge	platelet-derived growth factor alpha polypeptide	platelet-derived growth factor alpha polypeptide	platelet-derived growth factor alpha polypeptide	4	40	-2.52442	0.0695638	PDGFA	ENSG00000197461	ENST00000402802,ENST00000354513	ENSP00000383889,ENSP00000346508	P04085
0.0427014	Parkinson_disease_PGS000903	protease, serine 27	protease, serine 27	protease, serine 27	4	40	2.54341	0.0629693	PRSS27	ENSG00000172382	ENST00000302641	ENSP00000306390	Q9BQR3
0.0413909	T2D_cases_vs_HbA1c_filtered_controls_PGS000712	oleoyl-arachidonoyl-glycerol (18:1/20:4) [2]*	oleoyl-arachidonoyl-glycerol (18:1/20:4) [2]*	oleoyl-arachidonoyl-glycerol (18:1/20:4) [2]*	4	40	2.55448	0.0479148
0.0435225	Alzheimers_PGS002753	interleukin 10 receptor, alpha	interleukin 10 receptor, alpha	IL10RA	4	40	2.57101	0.0690531	IL10RA	ENSG00000110324	ENST00000227752	ENSP00000227752	Q13651
0.0436997	Timmers_healthspan	N-acetylglycine	n-acetylglycine	n-acetylglycine	4	40	2.53253	0.067393
0.0437992	amyotrophic_lateral_sclerosis	ribitol	ribitol	ribitol	4	40	-2.53181	0.0837299
0.0470795	Coronary_artery_disease_PGS004941	CRP HIGH SENSITIVITY	crp high sensitivity	crp high sensitivity	4	40	2.48779	0.0269207
0.0458747	LDL_cholesterol_PGS003873	dopamine 3-O-sulfate	dopamine 3-o-sulfate	dopamine 3-o-sulfate	4	40	-2.49485	0.0171619
1e-08	Parkinson_disease_PGS000903	CARBON DIOXIDE (CO2)	carbon dioxide (co2)	carbon dioxide (co2)	3	30	9.75022	7.50884
1e-08	Alzheimers_PGS002753	PULSE_PRESSURE	pulse_pressure	pulse_pressure	3	30	-9.59666	7.65571
1e-08	Type_2_diabetes_SNPs_insulin_action_secretion_PGS000851	LDL SMALL	ldl small	ldl small	3	30	-18.4207	0
1e-08	Type_2_diabetes_SNPs_insulin_action_secretion_PGS000851	ALAT (SGPT)	alat (sgpt)	alat (sgpt)	3	30	10.1425	7.17751
1e-08	Timmers_lifespan	PULSE_PRESSURE	pulse_pressure	pulse_pressure	3	30	14.1727	7.35771
0.000142869	HDL_cholesterol_PGS002781	OMEGA_6_TOTAL	omega_6_total	omega_6_total	3	30	5.99852	0.695006
0.000229142	Alzheimer_disease_late_onset_PGS000053	LDL SMALL	ldl small	ldl small	3	30	-5.79402	0.69543
0.000600397	Coronary_atherosclerosis_PGS002048	FERRITIN	ferritin	ferritin	3	30	4.92818	1.13382
0.000816566	Alzheimer_disease_late_onset_PGS000053	OMEGA_6_TOTAL	omega_6_total	omega_6_total	3	30	5.41768	0.557961
0.000764784	Coronary_atherosclerosis_PGS002048	MEAN_ARTERIAL_BLOOD_PRESSURE	mean_arterial_blood_pressure	mean_arterial_blood_pressure	3	30	-5.29714	0.558271
0.000923882	frailty	HOMA-IR	homa-ir	homa-ir	3	30	5.44415	0.349817
0.0011833	Parkinson_disease_PGS000903	LDL PARTICLE NUMBER	ldl particle number	ldl particle number	3	30	5.13223	0.937199
0.00139325	Cardiovascular_disease_PGS002316	VITAMIN D, 25-OH TOT	vitamin D	vitamin D	3	30	4.91875	0.698631
0.00166771	Timmers_healthspan	GGT	ggt	ggt	3	30	4.60069	0.689186
0.00174823	Heart_failure_PGS001790	GGT	ggt	ggt	3	30	-4.91472	0.402855
0.00209296	Alzheimers_PGS002753	WEIGHT_CALC	weight_calc	weight_calc	3	30	4.81941	0.403121
0.00187363	LDL_cholesterol_PGS003873	HOMA-IR	homa-ir	homa-ir	3	30	-5.02887	0.403191
0.00206596	Coronary_atherosclerosis_PGS002048	CHLORIDE	chloride	chloride	3	30	-4.85834	0.466032
0.00250235	Parkinson_disease_PGS000903	VITAMIN D, 25-OH TOT	vitamin D	vitamin D	3	30	4.79409	0.362125
0.0021437	Coronary_vascular_disease_CVD_PGS004514	HDL PARTICLE NUMBER	hdl particle number	hdl particle number	3	30	-4.96675	0.325599
0.0027796	Alzheimer_disease_late_onset_PGS000053	ASAT (SGOT)	asat (sgot)	asat (sgot)	3	30	4.79884	0.403968
0.00297381	HDL_cholesterol_PGS002781	PULSE_PRESSURE	pulse_pressure	pulse_pressure	3	30	4.22765	0.673418
0.00339997	Timmers_healthspan	HOMA-IR	homa-ir	homa-ir	3	30	-4.83547	0.0776935
0.00349931	Timmers_healthspan	diastolic	diastolic	diastolic	3	30	-4.77412	0.089732
0.0037547	Type_2_diabetes_SNPs_insulin_action_PGS000850	PULSE_PRESSURE	pulse_pressure	pulse_pressure	3	30	-4.61227	0.196313
0.00533995	Coronary_artery_disease_PGS004941	VITAMIN D, 25-OH TOT	vitamin D	vitamin D	3	30	4.07323	0.513999
0.00539864	T2D_cases_vs_HbA1c_filtered_controls_PGS000712	GLUCOSE	glucose	glucose	3	30	4.21854	0.241592
0.00582696	LDL_cholesterol_PGS003873	ASAT (SGOT)	asat (sgot)	asat (sgot)	3	30	-3.98884	0.481554
0.00579019	Alzheimer_disease_late_onset_PGS000053	ALKALINE PHOSPHATASE	alkaline phosphatase	alkaline phosphatase	3	30	-4.26525	0.113196
0.0062825	Coronary_atherosclerosis_PGS002048	diastolic	diastolic	diastolic	3	30	-3.50451	0.760013
0.00613867	Coronary_atherosclerosis_PGS002048	LDL-CHOL CALCULATION	ldl-chol calculation	ldl-chol calculation	3	30	-3.66828	0.586686
0.00617273	mvAge	VITAMIN D, 25-OH TOT	vitamin D	vitamin D	3	30	-3.77852	0.562624
0.00657257	Type_2_diabetes_SNPs_insulin_action_secretion_PGS000851	LDL PARTICLE NUMBER	ldl particle number	ldl particle number	3	30	-3.94172	0.509984
0.00670306	Timmers_healthspan	LDL PARTICLE NUMBER	ldl particle number	ldl particle number	3	30	-3.91102	0.539144
0.00724076	Parkinson_disease_PGS000903	ALKALINE PHOSPHATASE	alkaline phosphatase	alkaline phosphatase	3	30	3.91805	0.424663
0.00710964	Coronary_artery_disease_PGS004941	PULSE_PRESSURE	pulse_pressure	pulse_pressure	3	30	-3.97033	0.251185
0.00757514	Coronary_atherosclerosis_PGS002048	INSULIN	insulin	insulin	3	30	-3.8441	0.385504
0.00741981	Longevity_PGS000906	Triglyceride HDL Ratio	triglyceride hdl ratio	triglyceride hdl ratio	3	30	4.02242	0.162242
0.00774769	mvAge	GLUCOSE	glucose	glucose	3	30	-3.83013	0.354342
0.00745222	Coronary_atherosclerosis_PGS002048	LINOLEIC_ACID	linoleic_acid	linoleic_acid	3	30	3.5868	0.795154
0.00910201	Alzheimer_disease_late_onset_PGS000053	LDL PARTICLE NUMBER	ldl particle number	ldl particle number	3	30	-3.62939	0.508703
0.00978047	Type_2_diabetes_SNPs_insulin_action_PGS000850	CHOLESTEROL, TOTAL	cholesterol, total	cholesterol, total	3	30	3.62708	0.380298
0.0108562	mvAge	HOMA-IR	homa-ir	homa-ir	3	30	-3.72662	0.121594
0.0115497	Alzheimers_PGS002753	ALAT (SGPT)	alat (sgpt)	alat (sgpt)	3	30	-3.64541	0.272872
0.0123348	T2D_cases_vs_HbA1c_filtered_controls_PGS000712	CHLORIDE	chloride	chloride	3	30	-3.25702	0.4498
0.012566	Alzheimers_PGS002753	LDL-CHOL CALCULATION	ldl-chol calculation	ldl-chol calculation	3	30	3.49647	0.237373
0.0123011	Parkinson_disease_PGS000903	BUN/CREAT RATIO	bun/creat ratio	bun/creat ratio	3	30	-3.40537	0.305645
0.0127606	Alzheimers_PGS002753	GLUCOSE	glucose	glucose	3	30	-3.02933	0.621019
0.0129307	Parkinson_disease_PGS000903	diastolic	diastolic	diastolic	3	30	3.42802	0.262219
0.0130543	Coronary_atherosclerosis_PGS002048	PULSE_PRESSURE	pulse_pressure	pulse_pressure	3	30	3.48146	0.327521
0.0132912	Alzheimers_PGS002753	HOMOCYSTEINE, SERUM	homocysteine, serum	homocysteine, serum	3	30	-3.45204	0.221172
0.0133345	Timmers_lifespan	OMEGA_6_TOTAL	omega_6_total	omega_6_total	3	30	3.41055	0.24351
0.0133613	Timmers_lifespan	URIC ACID	uric acid	uric acid	3	30	3.25359	0.449681
0.0133848	Timmers_lifespan	MEAN_ARTERIAL_BLOOD_PRESSURE	mean_arterial_blood_pressure	mean_arterial_blood_pressure	3	30	-3.26461	0.44211
0.0134085	Timmers_lifespan	diastolic	diastolic	diastolic	3	30	-3.37104	0.334327
0.0135723	Timmers_longevity	EPA	epa	epa	3	30	-3.25873	0.412673
0.0136059	Alzheimer_disease_late_onset_PGS000053	diastolic	diastolic	diastolic	3	30	-3.46072	0.351325
0.013777	amyotrophic_lateral_sclerosis	BMI_CALC	bmi_calc	bmi_calc	3	30	-3.40864	0.266212
0.0138015	LDL_cholesterol_PGS003873	BUN/CREAT RATIO	bun/creat ratio	bun/creat ratio	3	30	-3.31996	0.307784
0.0141873	Longevity_PGS000906	SODIUM	sodium	sodium	3	30	3.40927	0.331174
0.0142818	Type_2_diabetes_T2D_PGS004923	LDL SMALL	ldl small	ldl small	3	30	3.29065	0.418822
0.0144221	Alzheimer_disease_late_onset_PGS000053	MEAN_ARTERIAL_BLOOD_PRESSURE	mean_arterial_blood_pressure	mean_arterial_blood_pressure	3	30	-3.34828	0.324305
0.0145214	mvAge	CARBON DIOXIDE (CO2)	carbon dioxide (co2)	carbon dioxide (co2)	3	30	-3.38239	0.262448
0.015154	Type_2_diabetes_SNPs_insulin_action_PGS000850	GGT	ggt	ggt	3	30	3.49999	0.0917614
0.0154748	Cardiovascular_disease_PGS002316	ALAT (SGPT)	alat (sgpt)	alat (sgpt)	3	30	3.31289	0.195449
0.0155876	amyotrophic_lateral_sclerosis	ethylmalonate	ethylmalonate	ethylmalonate	3	30	2.98641	0.476312
0.0161755	Parkinson_disease_PGS000903	INSULIN	insulin	insulin	3	30	3.04744	0.403586
0.0171068	Type_2_diabetes_SNPs_insulin_action_secretion_PGS000851	GLUCOSE	glucose	glucose	3	30	3.27203	0.287575
0.0174838	Timmers_longevity	GGT	ggt	ggt	3	30	3.12379	0.353535
0.0174945	Alzheimers_PGS002753	LDL PARTICLE NUMBER	ldl particle number	ldl particle number	3	30	3.31617	0.133616
0.0181176	Timmers_lifespan	HOMA-IR	homa-ir	homa-ir	3	30	-3.13335	0.23082
0.0182447	Parkinson_disease_PGS000903	OMEGA-6/OMEGA-3 RATIO	omega-6/omega-3 ratio	omega-6/omega-3 ratio	3	30	3.26826	0.168639
0.0183506	Timmers_lifespan	GLUCOSE	glucose	glucose	3	30	-2.91996	0.406526
0.0184352	Timmers_healthspan	cholate	cholate	cholate	3	30	-2.90223	0.412185
0.0185927	Timmers_longevity	HDL CHOL DIRECT	hdl chol direct	hdl chol direct	3	30	3.09412	0.35715
0.0187103	Coronary_artery_disease_PGS004941	FERRITIN	ferritin	ferritin	3	30	3.16077	0.169848
0.0191278	Heart_failure_PGS001790	HDL PARTICLE NUMBER	hdl particle number	hdl particle number	3	30	3.11646	0.355634
0.0190903	Longevity_PGS000906	PULSE_PRESSURE	pulse_pressure	pulse_pressure	3	30	3.2308	0.116438
0.0203304	Timmers_healthspan	PULSE_PRESSURE	pulse_pressure	pulse_pressure	3	30	-3.13177	0.151164
0.0208356	Timmers_longevity	LDL SMALL	ldl small	ldl small	3	30	3.15002	0.104878
0.0217512	Coronary_atherosclerosis_PGS002048	UREA NITROGEN	urea nitrogen	urea nitrogen	3	30	3.04051	0.183139
0.0232289	Heart_failure_PGS001790	delta-like 1 homolog (Drosophila)	delta-like 1 homolog (drosophila)	delta-like 1 homolog (drosophila)	3	30	-2.91264	0.280004	DLK1	ENSG00000185559	ENST00000341267,ENST00000331224	ENSP00000340292,ENSP00000331081	P80370
0.0218639	Heart_failure_PGS001790	S-allylcysteine	s-allylcysteine	s-allylcysteine	3	30	2.88605	0.295421
0.0219869	HDL_cholesterol_PGS002781	2,3-dihydroxyisovalerate	2,3-dihydroxyisovalerate	2,3-dihydroxyisovalerate	3	30	3.00111	0.276994
0.0238647	LDL_cholesterol_PGS003873	X - 19141	x - 19141	x - 19141	3	30	2.93897	0.263357
0.0227572	Alzheimer_disease_late_onset_PGS000053	GLUCOSE	glucose	glucose	3	30	3.08041	0.108633
0.0226998	Timmers_longevity	GLUCOSE	glucose	glucose	3	30	3.09251	0.115785
0.0227949	mvAge	FERRITIN	ferritin	ferritin	3	30	2.81996	0.354195
0.0245203	Alzheimers_PGS002753	OMEGA-6/OMEGA-3 RATIO	omega-6/omega-3 ratio	omega-6/omega-3 ratio	3	30	-2.85092	0.297263
0.0247141	Type_2_diabetes_SNPs_insulin_action_PGS000850	chemokine (C-C motif) ligand 3	chemokine (c-c motif) ligand 3	chemokine (c-c motif) ligand 3	3	30	-2.73834	0.275746	CCL3	ENSG00000006075	ENST00000225245	ENSP00000225245	P10147
0.0247141	Type_2_diabetes_SNPs_insulin_action_PGS000850	chemokine (C-C motif) ligand 3	chemokine (c-c motif) ligand 3	chemokine (c-c motif) ligand 3	3	30	-2.73834	0.275746	CCL3	ENSG00000006075	ENST00000225245	ENSP00000225245	P10147
0.0249045	HDL_cholesterol_PGS002781	URIC ACID	uric acid	uric acid	3	30	-3.01702	0.12719
0.0249027	LDL_cholesterol_PGS003873	1-palmitoyl-2-stearoyl-GPC (16:0/18:0)	1-palmitoyl-2-stearoyl-gpc (16:0/18:0)	GPC(16:0/18:0)	3	30	2.92251	0.24412
0.0254647	Coronary_vascular_disease_CVD_PGS004514	diastolic	diastolic	diastolic	3	30	3.02195	0.0886102
0.025639	Type_2_diabetes_SNPs_insulin_action_secretion_PGS000851	OMEGA_6_TOTAL	omega_6_total	omega_6_total	3	30	2.89446	0.249387
0.0258653	Timmers_healthspan	ALAT (SGPT)	alat (sgpt)	alat (sgpt)	3	30	-2.77565	0.257192
0.0265541	amyotrophic_lateral_sclerosis	CHLORIDE	chloride	chloride	3	30	3.00185	0.0369265
0.0284765	Longevity_PGS000906	1-oleoylglycerol (18:1)	1-oleoylglycerol (18:1)	1-oleoylglycerol (18:1)	3	30	2.72422	0.276343
0.0266572	amyotrophic_lateral_sclerosis	OMEGA_3_TOTAL	omega_3_total	omega_3_total	3	30	2.88774	0.222184
0.026968	Type_2_diabetes_SNPs_insulin_action_secretion_PGS000851	LDL-CHOL CALCULATION	ldl-chol calculation	ldl-chol calculation	3	30	-2.95881	0.0840536
0.028897	LDL_cholesterol_PGS003873	isoursodeoxycholate	isoursodeoxycholate	isoursodeoxycholate	3	30	2.76469	0.223731
0.0290206	Timmers_healthspan	3,5-dichloro-2,6-dihydroxybenzoic acid	3,5-dichloro-2,6-dihydroxybenzoic acid	3,5-dichloro-2,6-dihydroxybenzoic acid	3	30	2.7855	0.277826
0.0298014	T2D_cases_vs_HbA1c_filtered_controls_PGS000712	Triglyceride HDL Ratio	triglyceride hdl ratio	triglyceride hdl ratio	3	30	-2.66796	0.290224
0.0284106	LDL_cholesterol_PGS003873	LINOLEIC_ACID	linoleic_acid	linoleic_acid	3	30	2.82289	0.225377
0.0283506	Cardiovascular_disease_PGS002316	INSULIN	insulin	insulin	3	30	2.65479	0.287126
0.0297753	LDL_cholesterol_PGS003873	taurochenodeoxycholate	taurochenodeoxycholate	taurochenodeoxycholate	3	30	-2.80702	0.289333
0.0307409	Heart_failure_PGS001790	decadienedioic acid (C10:2-DC)**	decadienedioic acid (c10:2-dc)**	decadienedioic acid (c10:2-dc)**	3	30	2.71895	0.235974
0.0289914	Parkinson_disease_PGS000903	CHLORIDE	chloride	chloride	3	30	2.72152	0.208114
0.029757	LDL_cholesterol_PGS003873	OMEGA_6_TOTAL	omega_6_total	omega_6_total	3	30	2.81706	0.137899
0.0295144	Alzheimer_disease_late_onset_PGS000053	CHLORIDE	chloride	chloride	3	30	-2.93115	0.0130814
0.0316099	T2D_cases_vs_HbA1c_filtered_controls_PGS000712	follistatin	follistatin	follistatin	3	30	-2.74245	0.182103	FST	ENSG00000134363	ENST00000256759,ENST00000396947	ENSP00000256759,ENSP00000380151	P19883
0.0299112	T2D_cases_vs_HbA1c_filtered_controls_PGS000712	ALAT (SGPT)	alat (sgpt)	alat (sgpt)	3	30	-2.72079	0.189273
0.029931	T2D_cases_vs_HbA1c_filtered_controls_PGS000712	OMEGA-6/OMEGA-3 RATIO	omega-6/omega-3 ratio	omega-6/omega-3 ratio	3	30	-2.73322	0.227767
0.0300492	Coronary_artery_disease_PGS004941	low density lipoprotein receptor	low density lipoprotein receptor	low density lipoprotein receptor	3	30	-2.85879	0.068026	LDLR	ENSG00000130164	ENST00000558518,ENST00000455727,ENST00000535915,ENST00000545707,ENST00000558013	ENSP00000454071,ENSP00000397829,ENSP00000440520,ENSP00000437639,ENSP00000453346	P01130
0.0318037	Timmers_healthspan	palmitoleoyl-linoleoyl-glycerol (16:1/18:2) [1]*	palmitoleoyl-linoleoyl-glycerol (16:1/18:2) [1]*	PLG(16:1/18:2)[1]	3	30	-2.8196	0.106358
0.0299822	Coronary_vascular_disease_CVD_PGS004514	CD274 molecule	cd274 molecule	cd274 molecule	3	30	-2.68838	0.222833	CD274	ENSG00000120217	ENST00000381577,ENST00000381573	ENSP00000370989,ENSP00000370985	Q9NZQ7
0.0316004	mvAge	tyrosine	tyrosine	tyrosine	3	30	2.81286	0.122619
0.0305679	HDL_cholesterol_PGS002781	diastolic	diastolic	diastolic	3	30	2.74601	0.251781
0.0306296	Coronary_vascular_disease_CVD_PGS004514	methyl-4-hydroxybenzoate sulfate	methyl-4-hydroxybenzoate sulfate	methyl-4-hydroxybenzoate sulfate	3	30	2.66509	0.232393
0.0329755	Type_2_diabetes_SNPs_insulin_action_PGS000850	renin	renin	renin	3	30	-2.76426	0.204289	REN	ENSG00000143839	ENST00000272190,ENST00000367195	ENSP00000272190,ENSP00000356163	P00797
0.0324655	Timmers_lifespan	1-linoleoyl-GPI (18:2)*	1-linoleoyl-gpi (18:2)*	1-linoleoyl-gpi (18:2)*	3	30	2.6501	0.219761
0.0326486	Type_2_diabetes_SNPs_insulin_action_secretion_PGS000851	pregnenediol disulfate (C21H34O8S2)*	pregnenediol disulfate (c21h34o8s2)*	pregnenediol disulfate (c21h34o8s2)*	3	30	-2.82121	0.0993514
0.0330446	Direct_bilirubin_umol_L_PGS000681	myoglobin	myoglobin	myoglobin	3	30	-2.70744	0.180784	MB	ENSG00000198125	ENST00000397326,ENST00000406324,ENST00000359787,ENST00000397328	ENSP00000380489,ENSP00000384239,ENSP00000352835,ENSP00000380491	P02144
0.0323844	T2D_cases_vs_HbA1c_filtered_controls_PGS000712	chemokine (C-C motif) ligand 15	chemokine(c-c motif)lig15	chemokine (c-c motif) ligand 15	3	30	2.62033	0.235298	CCL15	ENSG00000267596	ENST00000354059	ENSP00000293276	Q16663
0.0315221	T2D_cases_vs_HbA1c_filtered_controls_PGS000712	chemokine (C-C motif) ligand 23	chemokine (c-c motif) ligand 23	chemokine (c-c motif) ligand 23	3	30	2.70203	0.165423	CCL23	ENSG00000167236	ENST00000591423,ENST00000293280	ENSP00000465954,ENSP00000293280	P55773
0.0313201	HDL_cholesterol_PGS002781	1-palmitoyl-2-stearoyl-GPC (16:0/18:0)	1-palmitoyl-2-stearoyl-gpc (16:0/18:0)	GPC(16:0/18:0)	3	30	-2.74392	0.132996
0.0315514	Cardiovascular_disease_PGS002316	lectin, galactoside-binding, soluble, 3	lectin, galactoside-binding, soluble, 3	lectin, galactoside-binding, soluble, 3	3	30	2.64845	0.218036	LGALS3	ENSG00000131981	ENST00000254301	ENSP00000254301	P17931
0.0331479	Alzheimer_disease_late_onset_PGS000053	homostachydrine*	homostachydrine*	homostachydrine*	3	30	-2.64594	0.222534
0.0319577	Coronary_artery_disease_PGS004941	glycosyl-N-stearoyl-sphingosine (d18:1/18:0)	glycosyl-n-stearoyl-sphingosine (d18:1/18:0)	GlySph(d18:1/18:0)	3	30	2.73733	0.154212
0.0338677	Timmers_lifespan	X - 12007	x - 12007	x - 12007	3	30	-2.62134	0.211122
0.0339997	Parkinson_disease_PGS000903	chemokine (C-C motif) ligand 19	chemokine (c-c motif) ligand 19	chemokine (c-c motif) ligand 19	3	30	2.66625	0.173751	CCL19	ENSG00000172724	ENST00000311925	ENSP00000308815	Q99731
0.032209	mvAge	OMEGA_6_TOTAL	omega_6_total	omega_6_total	3	30	2.65458	0.177462
0.0341651	Heart_failure_PGS001790	X - 13431	x - 13431	x - 13431	3	30	-2.60386	0.218985
0.0342587	Type_2_diabetes_SNPs_insulin_action_secretion_PGS000851	chemokine (C-X-C motif) ligand 1 (melanoma growth stimulating activity, alpha)	chemokine (c-x-c motif) ligand 1 (melanoma growth stimulating activity, alpha)	CXCL1	3	30	2.7026	0.151994	CXCL1	ENSG00000163739	ENST00000395761	ENSP00000379110	P09341
0.0342587	Type_2_diabetes_SNPs_insulin_action_secretion_PGS000851	chemokine (C-X-C motif) ligand 1 (melanoma growth stimulating activity, alpha)	chemokine (c-x-c motif) ligand 1 (melanoma growth stimulating activity, alpha)	CXCL1	3	30	2.7026	0.151994	CXCL1	ENSG00000163739	ENST00000395761	ENSP00000379110	P09341
0.0328979	Longevity_PGS000906	UREA NITROGEN	urea nitrogen	urea nitrogen	3	30	-2.78294	0.0602062
0.0327607	Heart_failure_PGS001790	DPA	dpa	dpa	3	30	2.69063	0.161641
0.0344404	Coronary_artery_disease_PGS004941	chemokine (C-C motif) ligand 25	chemokine (c-c motif) ligand 25	chemokine (c-c motif) ligand 25	3	30	-2.64217	0.190477	CCL25	ENSG00000131142	ENST00000253451,ENST00000390669	ENSP00000253451,ENSP00000375086	O15444
0.0328793	LDL_cholesterol_PGS003873	X - 17010	x - 17010	x - 17010	3	30	2.782	0.0918999
0.0331536	HDL_cholesterol_PGS002781	1-palmitoyl-2-oleoyl-GPE (16:0/18:1)	1-palmitoyl-2-oleoyl-gpe (16:0/18:1)	GPE(16:0/18:1)	3	30	2.66398	0.154416
0.0348041	mvAge	gastric intrinsic factor (vitamin B synthesis)	gastric intrinsic factor	GIF	3	30	2.72784	0.0992242	GIF	ENSG00000134812	ENST00000257248,ENST00000541311	ENSP00000257248,ENSP00000440427	P27352
0.0348452	Coronary_atherosclerosis_PGS002048	tumor necrosis factor receptor superfamily, member 13B	tnf receptor superfamily, member 13b	tumor necrosis factor receptor superfamily, member 13b	3	30	-2.646	0.173057	TNFRSF13B	ENSG00000240505	ENST00000261652,ENST00000583789	ENSP00000261652,ENSP00000462952	O14836
0.0346564	T2D_cases_vs_HbA1c_filtered_controls_PGS000712	OMEGA_3_TOTAL	omega_3_total	omega_3_total	3	30	2.65074	0.162468
0.0349976	frailty	ethyl alpha-glucopyranoside	ethyl alpha-glucopyranoside	ethyl alpha-glucopyranoside	3	30	-2.64649	0.195934
0.0333804	T2D_cases_vs_HbA1c_filtered_controls_PGS000712	indoleacetate	indoleacetate	indoleacetate	3	30	-2.68226	0.125089
0.0351628	Coronary_vascular_disease_CVD_PGS004514	X - 23639	x - 23639	x - 23639	3	30	2.66927	0.207806
0.035285	amyotrophic_lateral_sclerosis	sarcosine	sarcosine	sarcosine	3	30	-2.6883	0.115608
0.0336326	amyotrophic_lateral_sclerosis	ALAT (SGPT)	alat (sgpt)	alat (sgpt)	3	30	-2.73884	0.0799904
0.0353404	Alzheimer_disease_late_onset_PGS000053	gamma-glutamyltryptophan	gamma-glutamyltryptophan	gamma-glutamyltryptophan	3	30	2.65584	0.160069
0.0359094	Parkinson_disease_PGS000903	interleukin 5 (colony-stimulating factor, eosinophil)	interleukin 5	IL5	3	30	-2.73932	0.0658098	IL5	ENSG00000113525	ENST00000231454	ENSP00000231454	P05113
0.0359094	Parkinson_disease_PGS000903	interleukin 5 (colony-stimulating factor, eosinophil)	interleukin 5	IL5	3	30	-2.73932	0.0658098	IL5	ENSG00000113525	ENST00000231454	ENSP00000231454	P05113
0.0361221	Alzheimers_PGS002753	X - 21339	x - 21339	x - 21339	3	30	-2.63664	0.161463
0.036684	Type_2_diabetes_SNPs_insulin_action_PGS000850	S-methylcysteine sulfoxide	s-methylcysteine sulfoxide	s-methylcysteine sulfoxide	3	30	-2.6539	0.124925
0.036754	Coronary_atherosclerosis_PGS002048	fatty acid binding protein 6, ileal	fatty acid binding protein 6, ileal	fatty acid binding protein 6, ileal	3	30	2.59074	0.172811	FABP6	ENSG00000170231	ENST00000393980,ENST00000402432,ENST00000393982	ENSP00000377549,ENSP00000385433,ENSP00000377551	P51161
0.0359476	Cardiovascular_disease_PGS002316	pro-hydroxy-pro	pro-hydroxy-pro	pro-hydroxy-pro	3	30	-2.69504	0.0902711
0.0348927	Alzheimers_PGS002753	X - 24328	x - 24328	x - 24328	3	30	-2.69599	0.142175
0.0364012	Coronary_vascular_disease_CVD_PGS004514	X - 22162	x - 22162	x - 22162	3	30	-2.6572	0.130868
0.034951	Coronary_vascular_disease_CVD_PGS004514	linoleoyl-linolenoyl-glycerol (18:2/18:3) [2]*	linoleoyl-linolenoyl-glycerol (18:2/18:3) [2]*	LLG(18:2/18:3)[2]	3	30	2.66248	0.0995413
0.0366466	Parkinson_disease_PGS000903	X - 23780	x - 23780	x - 23780	3	30	2.61312	0.147191
0.03576	frailty	X - 12729	x - 12729	x - 12729	3	30	2.66217	0.155464
0.0377862	Timmers_longevity	methionine sulfone	methionine sulfone	methionine sulfone	3	30	2.73534	0.0231936
0.0371672	Coronary_atherosclerosis_PGS002048	glycochenodeoxycholate	glycochenodeoxycholate	glycochenodeoxycholate	3	30	-2.60468	0.144724
0.0377985	Timmers_healthspan	carbonic anhydrase VA, mitochondrial	carbonic anhydrase va, mitochondrial	carbonic anhydrase va, mitochondrial	3	30	2.65441	0.0908055	CA5A	ENSG00000174990	ENST00000309893	ENSP00000309649	P35218
0.0381033	mvAge	DPA	dpa	dpa	3	30	-2.70167	0.0599423
0.0356762	Parkinson_disease_PGS000903	LPIR_SCORE	lpir_score	lpir_score	3	30	2.59019	0.147694
0.0381918	Type_2_diabetes_SNPs_insulin_action_PGS000850	oncostatin M	oncostatin m	oncostatin m	3	30	-2.59552	0.138487	OSM	ENSG00000099985	ENST00000215781	ENSP00000215781	P13725
0.0367157	Heart_failure_PGS001790	octadecenedioate (C18:1-DC)*	octadecenedioate (c18:1-dc)*	octadecenedioate (c18:1-dc)*	3	30	2.60463	0.147341
0.0378524	Alzheimers_PGS002753	chitinase 1 (chitotriosidase)	chitinase 1 (chitotriosidase)	chitinase 1 (chitotriosidase)	3	30	-2.56184	0.154434	CHIT1	ENSG00000133063	ENST00000367229,ENST00000491855,ENST00000255427	ENSP00000356198,ENSP00000423778,ENSP00000255427	Q13231
0.0380484	Parkinson_disease_PGS000903	X - 11483	x - 11483	x - 11483	3	30	-2.62746	0.115003
0.0389814	Parkinson_disease_PGS000903	glutarylcarnitine (C5-DC)	glutarylcarnitine (c5-dc)	glutarylcarnitine (c5-dc)	3	30	2.56754	0.144872
0.0363656	frailty	glycerophosphoethanolamine	glycerophosphoethanolamine	glycerophosphoethanolamine	3	30	-2.59379	0.132453
0.038802	HDL_cholesterol_PGS002781	DPA	dpa	dpa	3	30	2.60165	0.121631
0.0391945	Heart_failure_PGS001790	orotate	orotate	orotate	3	30	-2.58875	0.124027
0.0392079	Timmers_healthspan	cortisone	cortisone	cortisone	3	30	-2.64607	0.112526
0.0394389	HDL_cholesterol_PGS002781	1-linoleoyl-GPG (18:2)*	1-linoleoyl-gpg (18:2)*	1-linoleoyl-gpg (18:2)*	3	30	-2.66973	0.0586269
0.0371276	Coronary_atherosclerosis_PGS002048	WEIGHT_CALC	weight_calc	weight_calc	3	30	-2.6013	0.148227
0.0397215	Timmers_longevity	1-(1-enyl-palmitoyl)-2-linoleoyl-GPE (P-16:0/18:2)*	1-(1-enyl-palmi)-2-lino-gpc(p-16:0/18:2)*	1-(1-enyl-palmitoyl)-2-linoleoyl-gpe (p-16:0/18:2)*	3	30	-2.63474	0.101206
0.0390717	Timmers_longevity	c-fos induced growth factor (vascular endothelial growth factor D)	c-fos induced growth factor	VEGFD	3	30	-2.54881	0.140381	FIGF	ENSG00000165197	ENST00000297904	ENSP00000297904	O43915
0.0390717	Timmers_longevity	c-fos induced growth factor (vascular endothelial growth factor D)	c-fos induced growth factor	VEGFD	3	30	-2.54881	0.140381	FIGF	ENSG00000165197	ENST00000297904	ENSP00000297904	O43915
0.0401068	Timmers_longevity	3-bromo-5-chloro-2,6-dihydroxybenzoic acid*	3-bromo-5-chloro-2,6-dihydroxybenzoic acid*	3-bromo-5-chloro-2,6-dihydroxybenzoic acid*	3	30	2.61531	0.124492
0.0387531	T2D_cases_vs_HbA1c_filtered_controls_PGS000712	activated leukocyte cell adhesion molecule	activated leukocyte cell adhesion molecule	activated leukocyte cell adhesion molecule	3	30	-2.55934	0.119615	ALCAM	ENSG00000170017	ENST00000306107,ENST00000472644	ENSP00000305988,ENSP00000419236	Q13740
0.0404403	amyotrophic_lateral_sclerosis	deoxycarnitine	deoxycarnitine	deoxycarnitine	3	30	-2.57596	0.0973768
0.0405368	T2D_cases_vs_HbA1c_filtered_controls_PGS000712	cyclo(pro-val)	cyclo(pro-val)	cyclo(pro-val)	3	30	2.61257	0.0669404
0.0390774	Coronary_artery_disease_PGS004941	16-hydroxypalmitate	16-hydroxypalmitate	16-hydroxypalmitate	3	30	2.57192	0.0999274
0.0404718	Parkinson_disease_PGS000903	HDL PARTICLE NUMBER	hdl particle number	hdl particle number	3	30	-2.61163	0.0668478
0.039245	Parkinson_disease_PGS000903	TIMP metallopeptidase inhibitor 4	timp metallopeptidase inhibitor 4	timp metallopeptidase inhibitor 4	3	30	-2.56969	0.0906237	TIMP4	ENSG00000157150	ENST00000287814	ENSP00000287814	Q99727
0.0410755	mvAge	thymic stromal lymphopoietin	thymic stromal lymphopoietin	thymic stromal lymphopoietin	3	30	-2.62695	0.071307	TSLP	ENSG00000145777	ENST00000420978,ENST00000344895	ENSP00000399099,ENSP00000339804	Q969D9
0.0411158	T2D_cases_vs_HbA1c_filtered_controls_PGS000712	chemokine (C-C motif) ligand 7	chemokine (c-c motif) ligand 7	chemokine (c-c motif) ligand 7	3	30	-2.59862	0.0705958	CCL7	ENSG00000108688	ENST00000378569	ENSP00000367832	P80098
0.0407126	Alzheimers_PGS002753	1-(1-enyl-stearoyl)-2-linoleoyl-GPC (P-18:0/18:2)*	1-(1-enyl-stearoyl)-2-linoleoyl-gpc (p-18:0/18:2)*	1-(1-enyl-stearoyl)-2-linoleoyl-gpc (p-18:0/18:2)*	3	30	2.59153	0.0774811
0.0407726	Type_2_diabetes_SNPs_insulin_action_PGS000850	tumor necrosis factor (ligand) superfamily, member 10	tumor necrosis factor (ligand) superfamily, member 10	tumor necrosis factor (ligand) superfamily, member 10	3	30	-2.6028	0.0607623	TNFSF10	ENSG00000121858	ENST00000241261,ENST00000420541	ENSP00000241261,ENSP00000389931	P50591
0.0407726	Type_2_diabetes_SNPs_insulin_action_PGS000850	tumor necrosis factor (ligand) superfamily, member 10	tumor necrosis factor (ligand) superfamily, member 10	tumor necrosis factor (ligand) superfamily, member 10	3	30	-2.6028	0.0607623	TNFSF10	ENSG00000121858	ENST00000241261,ENST00000420541	ENSP00000241261,ENSP00000389931	P50591
0.041066	Coronary_atherosclerosis_PGS002048	1-stearoyl-GPI (18:0)	1-stearoyl-gpi (18:0)	1-stearoyl-gpi (18:0)	3	30	2.64491	0.0189272
0.0412123	HDL_cholesterol_PGS002781	LDL SMALL	ldl small	ldl small	3	30	-2.6012	0.104931
0.0416391	Coronary_atherosclerosis_PGS002048	chemokine (C-X-C motif) ligand 16	chemokine (c-x-c motif) ligand 16	chemokine (c-x-c motif) ligand 16	3	30	-2.5439	0.10363	CXCL16	ENSG00000161921	ENST00000293778,ENST00000574412	ENSP00000293778,ENSP00000459592	Q9H2A7
0.039789	Alzheimers_PGS002753	matrix metallopeptidase 3 (stromelysin 1, progelatinase)	matrix metallopeptidase 3 (stromelysin 1, progelatinase)	MMP3	3	30	-2.53908	0.0971066	MMP3	ENSG00000263313,ENSG00000149968	ENST00000572537,ENST00000299855	ENSP00000458496,ENSP00000299855	P08254
0.0404806	Longevity_PGS000906	tumor necrosis factor	tumor necrosis factor	tumor necrosis factor	3	30	-2.53668	0.0931536	TNF	ENSG00000204490,ENSG00000228849,ENSG00000206439,ENSG00000228321,ENSG00000230108,ENSG00000223952,ENSG00000232810	ENST00000376122,ENST00000420425,ENST00000383496,ENST00000412275,ENST00000443707,ENST00000448781,ENST00000449264	ENSP00000365290,ENSP00000410668,ENSP00000372988,ENSP00000392858,ENSP00000389492,ENSP00000389490,ENSP00000398698	P01375
0.0426049	Parkinson_disease_PGS000903	N-acetylhistidine	n-acetylhistidine	n-acetylhistidine	3	30	2.54579	0.0865174
0.0423036	Timmers_longevity	N6-carbamoylthreonyladenosine	n6-carbamoylthreonyladenosine	n6-carbamoylthreonyladenosine	3	30	2.57482	0.0534514
0.0426017	Type_2_diabetes_SNPs_insulin_action_PGS000850	sphingosine	sphingosine	sphingosine	3	30	2.58264	0.0444044
0.0426345	frailty	X - 23636	x - 23636	x - 23636	3	30	-2.57365	0.0647445
0.0424513	Cardiovascular_disease_PGS002316	fructose	fructose	fructose	3	30	-2.56547	0.0918412
0.0412283	Heart_failure_PGS001790	gastric intrinsic factor (vitamin B synthesis)	gastric intrinsic factor	GIF	3	30	-2.58218	0.0586391	GIF	ENSG00000134812	ENST00000257248,ENST00000541311	ENSP00000257248,ENSP00000440427	P27352
0.0434283	frailty	LDL_SIZE	ldl_size	ldl_size	3	30	-2.55383	0.0722873
0.0435412	Longevity_PGS000906	4-hydroxychlorothalonil	4-hydroxychlorothalonil	4-hydroxychlorothalonil	3	30	2.56573	0.0521737
0.0435957	Type_2_diabetes_SNPs_insulin_action_PGS000850	1-palmitoyl-2-docosahexaenoyl-GPE (16:0/22:6)*	1-palmitoyl-2-docosahexaenoyl-gpe (16:0/22:6)*	GPE(16:0/22:6)	3	30	2.53921	0.0728198
0.0436885	Longevity_PGS000906	hexadecenedioate (C16:1-DC)*	hexadecenedioate (c16:1-dc)*	hexadecenedioate (c16:1-dc)*	3	30	-2.5283	0.0688998
0.0437558	HDL_cholesterol_PGS002781	X - 24306	x - 24306	x - 24306	3	30	-2.55073	0.0473522
0.0441766	Heart_failure_PGS001790	chitinase 1 (chitotriosidase)	chitinase 1 (chitotriosidase)	chitinase 1 (chitotriosidase)	3	30	2.53702	0.0508388	CHIT1	ENSG00000133063	ENST00000367229,ENST00000491855,ENST00000255427	ENSP00000356198,ENSP00000423778,ENSP00000255427	Q13231
0.0426421	Alzheimers_PGS002753	palmitoylcholine	palmitoylcholine	palmitoylcholine	3	30	2.52629	0.0592227
0.0448692	Longevity_PGS000906	sulfate of piperine metabolite C16H19NO3 (2)*	sulfate of piperine metabolite c16h19no3 (2)*	sulfate of piperine metabolite c16h19no3 (2)*	3	30	2.53185	0.0491061
0.0430096	Heart_failure_PGS001790	surfactant protein D	surfactant protein d	surfactant protein d	3	30	-2.55494	0.0233918	SFTPD	ENSG00000133661	ENST00000372292	ENSP00000361366	P35247
0.0449229	Coronary_artery_disease_PGS004941	5alpha-pregnan-3beta,20beta-diol monosulfate (1)	5alpha-preg-3b,20a-diol MS(1)	5Œ±-Preg-MS	3	30	2.51402	0.0567063
0.0452185	Parkinson_disease_PGS000903	isovalerylglycine	isovalerylglycine	isovalerylglycine	3	30	-2.51489	0.0636473
0.0453253	Parkinson_disease_PGS000903	1-oleoylglycerol (18:1)	1-oleoylglycerol (18:1)	1-oleoylglycerol (18:1)	3	30	-2.53009	0.0367059
0.045436	Type_2_diabetes_SNPs_insulin_action_secretion_PGS000851	thrombospondin 2	thrombospondin 2	thrombospondin 2	3	30	-2.53159	0.0453504	THBS2	ENSG00000186340	ENST00000366787	ENSP00000355751	P35442
0.0456093	Direct_bilirubin_umol_L_PGS000681	agouti related protein homolog (mouse)	agouti-rel protein hom(mouse)	agouti related protein homolog (mouse)	3	30	-2.53761	0.0229427	AGRP	ENSG00000159723	ENST00000290953	ENSP00000290953	O00253
0.0438497	Type_2_diabetes_SNPs_insulin_action_PGS000850	2-hydroxyoctanoate	2-hydroxyoctanoate	2-hydroxyoctanoate	3	30	2.54634	0.0132436
0.0458365	amyotrophic_lateral_sclerosis	X - 12101	x - 12101	x - 12101	3	30	2.54197	0.0176147
0.0460598	Coronary_atherosclerosis_PGS002048	palmitoylcholine	palmitoylcholine	palmitoylcholine	3	30	-2.50614	0.043858
0.0461482	Coronary_atherosclerosis_PGS002048	DPA	dpa	dpa	3	30	2.52977	0.0298897
0.0468026	frailty	gamma-glutamylvaline	gamma-glutamylvaline	gamma-glutamylvaline	3	30	-2.50962	0.0343851
0.0463811	Timmers_healthspan	N-acetylaspartate (NAA)	n-acetylaspartate (naa)	n-acetylaspartate (naa)	3	30	-2.50604	0.0327866
0.0463857	Alzheimer_disease_late_onset_PGS000053	5alpha-androstan-3alpha,17beta-diol monosulfate (1)	5alpha-androstan-3alpha,17beta-diol monosulfate (1)	5a-Androstan-3a17b-DS	3	30	2.51806	0.0287078
0.0465158	Alzheimer_disease_late_onset_PGS000053	phenylacetylglutamine	phenylacetylglutamine	phenylacetylglutamine	3	30	2.51353	0.032035
0.0471645	LDL_cholesterol_PGS003873	myoglobin	myoglobin	myoglobin	3	30	2.49825	0.028522	MB	ENSG00000198125	ENST00000397326,ENST00000406324,ENST00000359787,ENST00000397328	ENSP00000380489,ENSP00000384239,ENSP00000352835,ENSP00000380491	P02144
0.0474745	HDL_cholesterol_PGS002781	(N(1) + N(8))-acetylspermidine	(n(1) + n(8))-acetylspermidine	(n(1) + n(8))-acetylspermidine	3	30	-2.49024	0.0294186
0.0470323	Alzheimers_PGS002753	malate	malate	malate	3	30	2.49922	0.0190224
0.0473403	Coronary_vascular_disease_CVD_PGS004514	X - 17010	x - 17010	x - 17010	3	30	-2.50749	0.00640493
0.0479739	Direct_bilirubin_umol_L_PGS000681	palmitoyl-oleoyl-glycerol (16:0/18:1) [2]*	palmitoyl-oleoyl-glycerol (16:0/18:1) [2]*	palmitoyl-oleoyl-glycerol (16:0/18:1) [2]*	3	30	-2.48144	0.0412108
0.0462312	frailty	dopamine 3-O-sulfate	dopamine 3-o-sulfate	dopamine 3-o-sulfate	3	30	2.4888	0.0175172
0.0460091	Alzheimer_disease_late_onset_PGS000053	BMI_CALC	bmi_calc	bmi_calc	3	30	-2.49466	0.0227411
0.0165625	frailty	GGT	ggt	ggt	2	20	-3.09049	0.540846
0.0168558	Type_2_diabetes_SNPs_insulin_action_secretion_PGS000851	BMI_CALC	bmi_calc	bmi_calc	2	20	-3.04764	0.562864
0.0211261	Heart_failure_PGS001790	ALAT (SGPT)	alat (sgpt)	alat (sgpt)	2	20	2.88253	0.518124
0.0224775	Timmers_longevity	LDL PARTICLE NUMBER	ldl particle number	ldl particle number	2	20	2.91474	0.412789
0.0239178	Longevity_PGS000906	ARACHIDONIC ACID	arachidonic acid	arachidonic acid	2	20	-2.98927	0.234628
0.0235467	Cardiovascular_disease_PGS002316	phenylalanine	phenylalanine	phenylalanine	2	20	-3.00893	0.192582
0.0243775	Timmers_healthspan	WEIGHT_CALC	weight_calc	weight_calc	2	20	2.91168	0.283021
0.0272753	Timmers_longevity	tartronate (hydroxymalonate)	tartronate (hydroxymalonate)	tartronate (hydroxymalonate)	2	20	-2.83509	0.358584
0.0258725	Alzheimer_disease_late_onset_PGS000053	VITAMIN D, 25-OH TOT	vitamin D	vitamin D	2	20	3.01976	0.0873529
0.0275392	Timmers_longevity	phenylacetylglutamine	phenylacetylglutamine	phenylacetylglutamine	2	20	2.82311	0.329288
0.026858	Alzheimers_PGS002753	4-ethylcatechol sulfate	4-ethylcatechol sulfate	4-ethylcatechol sulfate	2	20	2.81924	0.298089
0.0295664	Type_2_diabetes_SNPs_insulin_action_secretion_PGS000851	palmitoyl ethanolamide	palmitoyl ethanolamide	palmitoyl ethanolamide	2	20	-2.81371	0.271036
0.0297597	frailty	ALAT (SGPT)	alat (sgpt)	alat (sgpt)	2	20	-2.80531	0.259157
0.0291285	Alzheimers_PGS002753	4-hydroxyphenylacetylglutamine	4-OHphenylacetylglutamine	4-hydroxyphenylacetylglutamine	2	20	-2.78061	0.26396
0.0291758	Alzheimers_PGS002753	ALKALINE PHOSPHATASE	alkaline phosphatase	alkaline phosphatase	2	20	2.83129	0.190887
0.0290691	LDL_cholesterol_PGS003873	1,2-dipalmitoyl-GPC (16:0/16:0)	1,2-dipalmitoyl-gpc (16:0/16:0)	1,2-dipalmitoyl-gpc (16:0/16:0)	2	20	2.75301	0.29722
0.0287937	HDL_cholesterol_PGS002781	sphingomyelin (d18:2/24:1, d18:1/24:2)*	sphingomyelin (d18:2/24:1, d18:1/24:2)*	sphingomyelin (d18:2/24:1, d18:1/24:2)*	2	20	2.78099	0.252737
0.0312697	Alzheimer_disease_late_onset_PGS000053	matrix metallopeptidase 12 (macrophage elastase)	matrix metallopeptidase 12 (macrophage elastase)	matrix metallopeptidase 12 (macrophage elastase)	2	20	-2.71477	0.317007	MMP12	ENSG00000262406	ENST00000571244	ENSP00000458585	P39900
0.0296762	Heart_failure_PGS001790	CHOLESTEROL, TOTAL	cholesterol, total	cholesterol, total	2	20	2.73362	0.282266
0.0301862	Timmers_longevity	OMEGA-3 INDEX	omega-3 index	omega-3 index	2	20	2.73247	0.281396
0.0304132	Coronary_vascular_disease_CVD_PGS004514	BUN/CREAT RATIO	bun/creat ratio	bun/creat ratio	2	20	2.7874	0.192738
0.0304584	Cardiovascular_disease_PGS002316	HOMA-IR	homa-ir	homa-ir	2	20	2.67861	0.345849
0.031914	amyotrophic_lateral_sclerosis	glutamine conjugate of C6H10O2 (2)*	glutamine conjugate of c6h10o2 (2)*	glutamine conjugate of c6h10o2 (2)*	2	20	2.79821	0.174532
0.0322445	Parkinson_disease_PGS000903	interleukin 10 receptor, alpha	interleukin 10 receptor, alpha	IL10RA	2	20	2.75491	0.216407	IL10RA	ENSG00000110324	ENST00000227752	ENSP00000227752	Q13651
0.031082	amyotrophic_lateral_sclerosis	dodecanedioate (C12-DC)	dodecanedioate (c12-dc)	dodecanedioate (c12-dc)	2	20	2.67344	0.329227
0.0329173	Cardiovascular_disease_PGS002316	orotidine	orotidine	orotidine	2	20	-2.73521	0.21943
0.0333006	Timmers_healthspan	gamma-glutamylthreonine	gamma-glutamylthreonine	gamma-glutamylthreonine	2	20	-2.68566	0.280372
0.0332785	Longevity_PGS000906	Fc fragment of IgG, low affinity IIb, receptor (CD32)	cd32	CD32	2	20	-2.69353	0.266157	FCGR2B	ENSG00000072694	ENST00000236937,ENST00000367961,ENST00000358671,ENST00000367962,ENST00000367960,ENST00000403078	ENSP00000236937,ENSP00000356938,ENSP00000351497,ENSP00000356939,ENSP00000356937,ENSP00000386038	P31994
0.0341117	HDL_cholesterol_PGS002781	pyridoxal	pyridoxal	pyridoxal	2	20	-2.73466	0.19658
0.0324955	Cardiovascular_disease_PGS002316	PULSE_PRESSURE	pulse_pressure	pulse_pressure	2	20	-2.79689	0.0910529
0.0343042	LDL_cholesterol_PGS003873	thioproline	thioproline	thioproline	2	20	-2.67053	0.248437
0.0345795	Timmers_lifespan	5alpha-pregnan-3beta,20alpha-diol disulfate	5alpha-preg-3b,20a-diol MS	5Œ±-Preg-DS	2	20	-2.67819	0.233035
0.0326791	Timmers_healthspan	lipoprotein lipase	lipoprotein lipase	lipoprotein lipase	2	20	-2.65858	0.260571	LPL	ENSG00000175445	ENST00000311322	ENSP00000309757	P06858
0.0350041	T2D_cases_vs_HbA1c_filtered_controls_PGS000712	chemokine (C motif) ligand 1	chemokine (c motif) ligand 1	chemokine (c motif) ligand 1	2	20	2.68313	0.212248	XCL1	ENSG00000143184	ENST00000367818	ENSP00000356792	P47992
0.0350456	Parkinson_disease_PGS000903	N,N-dimethylalanine	n,n-dimethylalanine	n,n-dimethylalanine	2	20	2.7802	0.0725651
0.0346002	T2D_cases_vs_HbA1c_filtered_controls_PGS000712	proline	proline	proline	2	20	2.7192	0.15781
0.035362	Type_2_diabetes_SNPs_insulin_action_secretion_PGS000851	androstenediol (3alpha, 17alpha) monosulfate (3)	androstenediol (3alpha, 17alpha) monosulfate (3)	Androstenediol-3a17a-MS-3	2	20	-2.73452	0.126619
0.0355229	Direct_bilirubin_umol_L_PGS000681	N-behenoyl-sphingadienine (d18:2/22:0)*	n-behenoyl-sphingadienine (d18:2/22:0)*	n-behenoyl-sphingadienine (d18:2/22:0)*	2	20	-2.69937	0.164327
0.0352015	HDL_cholesterol_PGS002781	5alpha-pregnan-3beta,20alpha-diol monosulfate (2)	5alpha-preg-3b,20a-diol MS(2)	5Œ±-Preg-MS2	2	20	-2.64546	0.23494
0.0354716	Alzheimers_PGS002753	androstenediol (3beta,17beta) disulfate (2)	androstenediol (3beta,17beta) disulfate (2)	Androstenediol_DS(2)	2	20	2.68865	0.172606
0.0358021	Timmers_healthspan	octadecadienedioate (C18:2-DC)*	octadecadienedioate (c18:2-dc)*	octadecadienedioate (c18:2-dc)*	2	20	2.639	0.238776
0.0362631	LDL_cholesterol_PGS003873	3-methyl-2-oxovalerate	3-methyl-2-oxovalerate	3-methyl-2-oxovalerate	2	20	2.67743	0.178669
0.0344401	Cardiovascular_disease_PGS002316	diastolic	diastolic	diastolic	2	20	2.64475	0.221444
0.0365658	Alzheimers_PGS002753	1-(1-enyl-palmitoyl)-2-linoleoyl-GPE (P-16:0/18:2)*	1-(1-enyl-palmi)-2-lino-gpc(p-16:0/18:2)*	1-(1-enyl-palmitoyl)-2-linoleoyl-gpe (p-16:0/18:2)*	2	20	2.72191	0.103142
0.0366052	Type_2_diabetes_SNPs_insulin_action_PGS000850	lignoceroylcarnitine (C24)*	lignoceroylcarnitine (c24)*	lignoceroylcarnitine (c24)*	2	20	2.65554	0.194698
0.0357953	LDL_cholesterol_PGS003873	taurodeoxycholate	taurodeoxycholate	taurodeoxycholate	2	20	-2.63442	0.223043
0.0368667	frailty	X - 17351	x - 17351	x - 17351	2	20	2.68881	0.135785
0.0370289	Timmers_lifespan	carboxypeptidase B1 (tissue)	carboxypeptidase b1 (tissue)	carboxypeptidase b1 (tissue)	2	20	-2.61515	0.23282	CPB1	ENSG00000153002	ENST00000491148,ENST00000282957	ENSP00000417222,ENSP00000282957	P15086
0.0351358	Type_2_diabetes_SNPs_insulin_action_secretion_PGS000851	advanced glycosylation end product-specific receptor	advanced glycosylation end product-specific receptor	RAGE	2	20	2.76552	0.0190293	AGER	ENSG00000206320,ENSG00000234729,ENSG00000237405,ENSG00000231268,ENSG00000229058,ENSG00000204305,ENSG00000230514	ENST00000383279,ENST00000383275,ENST00000451115,ENST00000551254,ENST00000547328,ENST00000441180,ENST00000453588,ENST00000436456,ENST00000550562,ENST00000548464,ENST00000441804,ENST00000432831,ENST00000447921,ENST00000551827,ENST00000551381,ENST00000427822,ENST00000412470,ENST00000449037,ENST00000456918,ENST00000547651,ENST00000549758,ENST00000375067,ENST00000375055,ENST00000375076,ENST00000438221…	ENSP00000372766,ENSP00000372762,ENSP00000401068,ENSP00000449226,ENSP00000448579,ENSP00000388462,ENSP00000399686,ENSP00000397227,ENSP00000446835,ENSP00000450134,ENSP00000391743,ENSP00000413391,ENSP00000395812,ENSP00000449042,ENSP00000448979,ENSP00000416042,ENSP00000387853,ENSP00000400667,ENSP00000409457,ENSP00000449708,ENSP00000447301,ENSP00000364208,ENSP00000364195,ENSP00000364217,ENSP00000387887…	Q15109
0.0372283	Type_2_diabetes_SNPs_insulin_action_secretion_PGS000851	citrulline	citrulline	citrulline	2	20	-2.68498	0.126193
0.037546	Alzheimers_PGS002753	glutamine conjugate of C6H10O2 (1)*	glutamine conjugate of c6h10o2 (1)*	glutamine conjugate of c6h10o2 (1)*	2	20	2.67105	0.132654
0.035829	Timmers_longevity	osteoclast associated, immunoglobulin-like receptor	osteoclast associated, immunoglobulin-like receptor	OSCAR	2	20	-2.73036	0.046224	OSCAR	ENSG00000170909,ENSG00000271658,ENSG00000273074	ENST00000391761,ENST00000356532,ENST00000359649,ENST00000358375,ENST00000351806,ENST00000284648,ENST00000604323,ENST00000605761,ENST00000573655,ENST00000576430,ENST00000572943,ENST00000571840,ENST00000570944,ENST00000571211	ENSP00000375641,ENSP00000348927,ENSP00000352671,ENSP00000351145,ENSP00000304523,ENSP00000365808,ENSP00000474338,ENSP00000474934,ENSP00000460337,ENSP00000460314,ENSP00000459649,ENSP00000460942,ENSP00000460784,ENSP00000460281	Q8IYS5
0.037115	LDL_cholesterol_PGS003873	deoxycholate	deoxycholate	deoxycholate	2	20	-2.68528	0.108095
0.0378117	Coronary_artery_disease_PGS004941	1-myristoyl-2-linoleoyl-GPC (14:0/18:2)*	1-myristoyl-2-linoleoyl-gpc (14:0/18:2)*	1-myristoyl-2-linoleoyl-gpc (14:0/18:2)*	2	20	-2.63352	0.180719
0.0377734	Coronary_atherosclerosis_PGS002048	1-stearoyl-2-dihomo-linolenoyl-GPI (18:0/20:3n3 or 6)*	1-stearoyl-2-dihomo-linolenoyl-gpi (18:0/20:3n3 or 6)*	GPI(18:0/20:3n3/6)	2	20	2.65579	0.149228
0.0372973	T2D_cases_vs_HbA1c_filtered_controls_PGS000712	1-(1-enyl-palmitoyl)-2-palmitoleoyl-GPC (P-16:0/16:1)*	1-(1-enyl-palmitoyl)-2-palmitoleoyl-gpc (p-16:0/16:1)*	GPC(p-16:0/16:1)	2	20	-2.60271	0.218542
0.0376327	HDL_cholesterol_PGS002781	interleukin 20	interleukin 20	IL20	2	20	-2.73812	0.0185899	IL20	ENSG00000162891	ENST00000367098,ENST00000367096	ENSP00000356065,ENSP00000356063	Q9NYY1
0.0382121	Type_2_diabetes_SNPs_insulin_action_PGS000850	salicylate	salicylate	salicylate	2	20	2.71684	0.0471305
0.0363767	Cardiovascular_disease_PGS002316	ALKALINE PHOSPHATASE	alkaline phosphatase	alkaline phosphatase	2	20	2.67176	0.108189
0.038393	HDL_cholesterol_PGS002781	ribonate	ribonate	ribonate	2	20	2.65557	0.12348
0.0388974	Alzheimer_disease_late_onset_PGS000053	1-palmitoyl-2-(hydroxylinoleoyl)-GPC (16:0/18:2(OH))*	1-palmitoyl-2-(hydroxylinoleoyl)-gpc (16:0/18:2(oh))*	GPC(16:0/18:2(OH))	2	20	2.58635	0.211439
0.0389454	Parkinson_disease_PGS000903	pyroglutamylvaline	pyroglutamylvaline	pyroglutamylvaline	2	20	-2.61513	0.169354
0.039011	Timmers_lifespan	kynurenate	kynurenate	kynurenate	2	20	2.72121	0.0186091
0.0387521	Timmers_longevity	1-(1-enyl-palmitoyl)-2-oleoyl-GPE (P-16:0/18:1)*	1-(1-enyl-palmitoyl)-2-oleoyl-gpe (p-16:0/18:1)*	GPE(p-16:0/18:1)	2	20	-2.66272	0.096328
0.0384572	Alzheimers_PGS002753	10-heptadecenoate (17:1n7)	10-heptadecenoate (17:1n7)	10-heptadecenoate (17:1n7)	2	20	2.60231	0.179061
0.0366359	Coronary_vascular_disease_CVD_PGS004514	HDL CHOL DIRECT	hdl chol direct	hdl chol direct	2	20	-2.725	0
0.0393657	LDL_cholesterol_PGS003873	1-palmitoyl-GPC (16:0)	1-palmitoyl-gpc (16:0)	1-palmitoyl-gpc (16:0)	2	20	2.71622	0.00924998
0.0385277	Cardiovascular_disease_PGS002316	X - 11308	x - 11308	x - 11308	2	20	-2.61974	0.144542
0.0387463	amyotrophic_lateral_sclerosis	linoleoylcholine*	linoleoylcholine*	linoleoylcholine*	2	20	-2.63651	0.119658
0.0368897	Heart_failure_PGS001790	deoxycarnitine	deoxycarnitine	deoxycarnitine	2	20	-2.72032	0
0.0374469	Heart_failure_PGS001790	plasminogen activator, urokinase	plasminogen activator, urokinase	plasminogen activator, urokinase	2	20	2.55693	0.144341	PLAU	ENSG00000122861	ENST00000372764	ENSP00000361850	P00749
0.0374469	Heart_failure_PGS001790	plasminogen activator, urokinase	plasminogen activator, urokinase	plasminogen activator, urokinase	2	20	2.55693	0.144341	PLAU	ENSG00000122861	ENST00000372764	ENSP00000361850	P00749
0.0374998	T2D_cases_vs_HbA1c_filtered_controls_PGS000712	N-acetylglutamine	n-acetylglutamine	n-acetylglutamine	2	20	-2.6275	0.120887
0.0398284	Parkinson_disease_PGS000903	thyroxine	thyroxine	thyroxine	2	20	-2.65312	0.078827
0.0398404	Type_2_diabetes_SNPs_insulin_action_PGS000850	X - 23590	x - 23590	x - 23590	2	20	-2.59777	0.155966
0.0394308	Longevity_PGS000906	X - 12680	x - 12680	x - 12680	2	20	-2.7031	0
0.0399113	Timmers_lifespan	palmitoyl-oleoyl-glycerol (16:0/18:1) [2]*	palmitoyl-oleoyl-glycerol (16:0/18:1) [2]*	palmitoyl-oleoyl-glycerol (16:0/18:1) [2]*	2	20	2.5953	0.146431
0.0379036	T2D_cases_vs_HbA1c_filtered_controls_PGS000712	X - 11849	x - 11849	x - 11849	2	20	2.56475	0.183679
0.0405579	Parkinson_disease_PGS000903	N-methylproline	n-methylproline	n-methylproline	2	20	-2.61717	0.10132
0.0403985	Type_2_diabetes_SNPs_insulin_action_secretion_PGS000851	chemokine (C-C motif) ligand 20	chemokine (c-c motif) ligand 20	chemokine (c-c motif) ligand 20	2	20	2.59477	0.131071	CCL20	ENSG00000115009	ENST00000409189,ENST00000358813	ENSP00000386273,ENSP00000351671	P78556
0.0404452	Alzheimers_PGS002753	(R)-3-hydroxybutyrylcarnitine	(r)-3-hydroxybutyrylcarnitine	(r)-3-hydroxybutyrylcarnitine	2	20	2.67754	0.0113642
0.0405127	Alzheimers_PGS002753	sphingomyelin (d18:1/21:0, d17:1/22:0, d16:1/23:0)*	sphingomyelin (d18:1/21:0, d17:1/22:0, d16:1/23:0)*	SM(d18:1/21:0...)	2	20	-2.63863	0.0613462
0.0411017	Direct_bilirubin_umol_L_PGS000681	phenylalanine	phenylalanine	phenylalanine	2	20	-2.63964	0.0516742
0.0408979	amyotrophic_lateral_sclerosis	X - 21319	x - 21319	x - 21319	2	20	2.61934	0.0781007
0.0414443	Alzheimer_disease_late_onset_PGS000053	X - 21470	x - 21470	x - 21470	2	20	2.61469	0.0769146
0.039527	Timmers_longevity	HOMOCYSTEINE, SERUM	homocysteine, serum	homocysteine, serum	2	20	2.57283	0.133878
0.0414388	Alzheimer_disease_late_onset_PGS000053	F11 receptor	f11 receptor	f11 receptor	2	20	2.55534	0.150541	F11R	ENSG00000158769	ENST00000368026	ENSP00000357005	Q9Y624
0.0412816	Direct_bilirubin_umol_L_PGS000681	ceramide (d18:1/20:0, d16:1/22:0, d20:1/18:0)*	ceramide (d18:1/20:0, d16:1/22:0, d20:1/18:0)*	ceramide (d18:1/20:0, d16:1/22:0, d20:1/18:0)*	2	20	-2.64811	0.0174067
0.0398079	Alzheimers_PGS002753	DHA	dha	dha	2	20	-2.56603	0.132386
0.0416156	Timmers_healthspan	1-palmityl-2-linoleoyl-GPC (O-16:0/18:2)*	1-palmityl-2-linoleoyl-gpc (o-16:0/18:2)*	1-palmityl-2-linoleoyl-gpc (o-16:0/18:2)*	2	20	-2.5933	0.0914777
0.0396437	Direct_bilirubin_umol_L_PGS000681	ALKALINE PHOSPHATASE	alkaline phosphatase	alkaline phosphatase	2	20	-2.58075	0.101576
0.04185	Timmers_healthspan	3-hydroxyisobutyrate	3-hydroxyisobutyrate	3-hydroxyisobutyrate	2	20	2.57652	0.107116
0.0419613	Timmers_longevity	cholate	cholate	cholate	2	20	2.59129	0.0830036
0.04204	Timmers_longevity	X - 12100	x - 12100	x - 12100	2	20	2.59352	0.0748134
0.0418582	mvAge	X - 22162	x - 22162	x - 22162	2	20	-2.56526	0.11363
0.040404	Alzheimers_PGS002753	triggering receptor expressed on myeloid cells-like 2	triggering receptor expressed on myeloid cells-like 2	TREM_like_2	2	20	2.53701	0.142019	TREML2	ENSG00000112195	ENST00000483722	ENSP00000418767	Q5T2D2
0.0424039	Type_2_diabetes_SNPs_insulin_action_PGS000850	cerotoylcarnitine (C26)*	cerotoylcarnitine (c26)*	cerotoylcarnitine (c26)*	2	20	2.57323	0.0896425
0.0422565	frailty	adenosine deaminase	adenosine deaminase	adenosine deaminase	2	20	2.57626	0.0818976	ADA	ENSG00000196839	ENST00000372874	ENSP00000361965	P00813
0.0405983	frailty	MEAN_ARTERIAL_BLOOD_PRESSURE	mean_arterial_blood_pressure	mean_arterial_blood_pressure	2	20	2.59006	0.0608456
0.0425332	Direct_bilirubin_umol_L_PGS000681	matrix metallopeptidase 10 (stromelysin 2)	matrix metallopeptidase 10 (stromelysin 2)	MMP10	2	20	2.60935	0.0330114	MMP10	ENSG00000166670	ENST00000279441	ENSP00000279441	P09238
0.0426231	Timmers_healthspan	N1-methylinosine	n1-methylinosine	n1-methylinosine	2	20	-2.57951	0.0748868
0.0408301	Heart_failure_PGS001790	angiotensin I converting enzyme 2	angiotensin i converting enzyme 2	angiotensin i converting enzyme 2	2	20	-2.55518	0.102819	ACE2	ENSG00000130234	ENST00000252519,ENST00000427411	ENSP00000252519,ENSP00000389326	Q9BYF1
0.0409072	frailty	3-hydroxyhippurate	3-hydroxyhippurate	3-hydroxyhippurate	2	20	-2.58732	0.0543308
0.0432253	frailty	succinate	succinate	succinate	2	20	-2.52571	0.137675
0.0410508	LDL_cholesterol_PGS003873	chymotrypsin C (caldecrin)	chymotrypsin c (caldecrin)	chymotrypsin c (caldecrin)	2	20	-2.61045	0.0166838	CTRC	ENSG00000162438	ENST00000375949	ENSP00000365116	Q99895
0.042774	frailty	secretoglobin, family 3A, member 2	secretoglobin, family 3a, member 2	secretoglobin, family 3a, member 2	2	20	-2.59269	0.0415414	SCGB3A2	ENSG00000164265	ENST00000296694	ENSP00000296694	Q96PL1
0.0412896	Parkinson_disease_PGS000903	N-acetylglutamine	n-acetylglutamine	n-acetylglutamine	2	20	2.5389	0.112644
0.0431767	Timmers_lifespan	palmitoyl-oleoyl-glycerol (16:0/18:1) [1]*	palmitoyl-oleoyl-glycerol (16:0/18:1) [1]*	POG(16:0/18:1)[1]	2	20	2.56692	0.0708802
0.0412156	Heart_failure_PGS001790	OMEGA-3 INDEX	omega-3 index	omega-3 index	2	20	-2.60917	0.0106176
0.0434232	Longevity_PGS000906	orotate	orotate	orotate	2	20	2.59322	0.0330481
0.0431184	T2D_cases_vs_HbA1c_filtered_controls_PGS000712	palmitoylcholine	palmitoylcholine	palmitoylcholine	2	20	-2.53701	0.107422
0.0434025	Longevity_PGS000906	paraxanthine	paraxanthine	paraxanthine	2	20	-2.55949	0.0753027
0.0413923	HDL_cholesterol_PGS002781	1-palmitoleoyl-2-linolenoyl-GPC (16:1/18:3)*	1-palm-2-lino-gpc(16:1/18:3)*	1-palmitoleoyl-2-linolenoyl-gpc (16:1/18:3)*	2	20	2.55844	0.076678
0.0415681	amyotrophic_lateral_sclerosis	UREA NITROGEN	urea nitrogen	urea nitrogen	2	20	-2.56033	0.0699363
0.0415807	Coronary_atherosclerosis_PGS002048	tumor necrosis factor receptor superfamily, member 11b	tnf receptor superfamily, member 11b	TNFRSF11B	2	20	2.53754	0.101891	TNFRSF11B	ENSG00000164761	ENST00000297350	ENSP00000297350	O00300
0.0415807	Coronary_atherosclerosis_PGS002048	tumor necrosis factor receptor superfamily, member 11b	tnf receptor superfamily, member 11b	TNFRSF11B	2	20	2.53754	0.101891	TNFRSF11B	ENSG00000164761	ENST00000297350	ENSP00000297350	O00300
0.0435108	Type_2_diabetes_SNPs_insulin_action_PGS000850	HDL CHOL DIRECT	hdl chol direct	hdl chol direct	2	20	-2.5534	0.0794632
0.0415409	Timmers_longevity	creatinine	creatinine	creatinine	2	20	2.52085	0.125015
0.0415827	Timmers_longevity	p-cresol sulfate	p-cresol sulfate	p-cresol sulfate	2	20	2.53876	0.0975344
0.0416026	LDL_cholesterol_PGS003873	urate	urate	urate	2	20	2.51838	0.125038
0.0437106	Cardiovascular_disease_PGS002316	MEAN_ARTERIAL_BLOOD_PRESSURE	mean_arterial_blood_pressure	mean_arterial_blood_pressure	2	20	2.58891	0.0246578
0.0418081	Heart_failure_PGS001790	CD4 molecule	cd4 molecule	cd4 molecule	2	20	-2.51765	0.122533	CD4	ENSG00000010610,ENSG00000268779	ENST00000011653,ENST00000594128	ENSP00000011653,ENSP00000469397	P01730
0.0439435	LDL_cholesterol_PGS003873	3-carboxy-4-methyl-5-propyl-2-furanpropanoate (CMPF)	3-carboxy-4-methyl-5-propyl-2-furanpropanoate (cmpf)	CMPF	2	20	2.55147	0.071795
0.0438569	frailty	linolenoylcarnitine (C18:3)*	linolenoylcarnitine (c18:3)*	linolenoylcarnitine (c18:3)*	2	20	2.53551	0.0880001
0.0445148	Heart_failure_PGS001790	glycochenodeoxycholate 3-sulfate	glycochenodeoxychola-3-so4	glycochenodeoxycholate 3-sulfate	2	20	-2.54488	0.0655413
0.0425312	Type_2_diabetes_SNPs_insulin_action_PGS000850	perfluorooctanoate (PFOA)	perfluorooctanoate (pfoa)	perfluorooctanoate (pfoa)	2	20	-2.52921	0.0871265
0.0442758	amyotrophic_lateral_sclerosis	1-carboxyethylleucine	1-carboxyethylleucine	1-carboxyethylleucine	2	20	2.54691	0.0617393
0.0444175	Timmers_lifespan	pyroglutamine*	pyroglutamine*	pyroglutamine*	2	20	-2.57789	0.0170974
0.0426912	Cardiovascular_disease_PGS002316	X - 21471	x - 21471	x - 21471	2	20	-2.56519	0.0338496
0.0429364	Type_2_diabetes_SNPs_insulin_action_secretion_PGS000851	eicosenedioate (C20:1-DC)*	eicosenedioate (c20:1-dc)*	eicosenedioate (c20:1-dc)*	2	20	2.52624	0.0796212
0.0447521	Type_2_diabetes_SNPs_insulin_action_PGS000850	1-pentadecanoyl-2-docosahexaenoyl-GPC (15:0/22:6)*	1-pentadecanoyl-2-docosahexaenoyl-gpc (15:0/22:6)*	GPC(15:0/22:6)	2	20	2.54829	0.048169
0.0449567	Heart_failure_PGS001790	3-methoxytyrosine	3-methoxytyrosine	3-methoxytyrosine	2	20	-2.52999	0.0702522
0.0450222	T2D_cases_vs_HbA1c_filtered_controls_PGS000712	1-methyl-5-imidazoleacetate	1-methyl-5-imidazoleacetate	1-methyl-5-imidazoleacetate	2	20	-2.5273	0.071922
0.0447627	Type_2_diabetes_SNPs_insulin_action_secretion_PGS000851	succinate	succinate	succinate	2	20	2.51707	0.0840622
0.043314	Coronary_atherosclerosis_PGS002048	tumor necrosis factor (ligand) superfamily, member 11	tumor necrosis factor (ligand) superfamily, member 11	TNFSF11	2	20	-2.54678	0.0395168	TNFSF11	ENSG00000120659	ENST00000358545,ENST00000239849,ENST00000405262,ENST00000398795,ENST00000544862	ENSP00000351347,ENSP00000239849,ENSP00000384042,ENSP00000381775,ENSP00000444913	O14788
0.0449373	Longevity_PGS000906	octadecenedioate (C18:1-DC)*	octadecenedioate (c18:1-dc)*	octadecenedioate (c18:1-dc)*	2	20	-2.56903	0
0.0435264	HDL_cholesterol_PGS002781	GLOBULIN	globulin	globulin	2	20	-2.51847	0.0691624
0.0454995	Alzheimer_disease_late_onset_PGS000053	X - 13729	x - 13729	x - 13729	2	20	2.50429	0.0882051
0.0455335	Timmers_longevity	interleukin 18 (interferon-gamma-inducing factor)	interleukin 18 (interferon-gamma-inducing factor)	interleukin 18 (interferon-gamma-inducing factor)	2	20	2.5361	0.0256831	IL18	ENSG00000150782	ENST00000280357,ENST00000524595,ENST00000528832	ENSP00000280357,ENSP00000434561,ENSP00000434161	Q14116
0.0455335	Timmers_longevity	interleukin 18 (interferon-gamma-inducing factor)	interleukin 18 (interferon-gamma-inducing factor)	interleukin 18 (interferon-gamma-inducing factor)	2	20	2.5361	0.0256831	IL18	ENSG00000150782	ENST00000280357,ENST00000524595,ENST00000528832	ENSP00000280357,ENSP00000434561,ENSP00000434161	Q14116
0.0456298	Parkinson_disease_PGS000903	1-palmitoyl-2-palmitoleoyl-GPC (16:0/16:1)*	1-palmitoyl-2-palmitoleoyl-gpc (16:0/16:1)*	GPC(16:0/16:1)	2	20	2.52991	0.0472387
0.0436862	Coronary_atherosclerosis_PGS002048	thyroxine	thyroxine	thyroxine	2	20	-2.52497	0.0472559
0.0457261	mvAge	CD5 molecule	cd5 molecule	cd5 molecule	2	20	2.51807	0.0537795	CD5	ENSG00000110448	ENST00000347785	ENSP00000342681	P06127
0.0441585	frailty	Triglyceride HDL Ratio	triglyceride hdl ratio	triglyceride hdl ratio	2	20	2.54179	0.0198135
0.0456597	Timmers_healthspan	gamma-glutamylglycine	gamma-glutamylglycine	gamma-glutamylglycine	2	20	2.52166	0.0472675
0.0443241	frailty	homostachydrine*	homostachydrine*	homostachydrine*	2	20	2.50333	0.0680427
0.0456321	Coronary_atherosclerosis_PGS002048	sphingomyelin (d18:1/25:0, d19:0/24:1, d20:1/23:0, d19:1/24:0)*	sphingomyelin (d18:1/25:0, d19:0/24:1, d20:1/23:0, d19:1/24:0)*	SM(d18:1/25:0,d19:0/24:1,...)	2	20	2.53349	0.0237296
0.0464805	HDL_cholesterol_PGS002781	X - 24307	x - 24307	x - 24307	2	20	-2.54076	0.00790506
0.0461569	Longevity_PGS000906	nicotinamide	nicotinamide	nicotinamide	2	20	2.53522	0.0157354
0.0444992	HDL_cholesterol_PGS002781	diacylglycerol (16:1/18:2 [2], 16:0/18:3 [1])*	diacylglycerol (16:1/18:2 [2], 16:0/18:3 [1])*	diacylglycerol (16:1/18:2 [2], 16:0/18:3 [1])*	2	20	-2.4935	0.0729647
0.0463691	HDL_cholesterol_PGS002781	retinoic acid receptor responder (tazarotene induced) 2	retinoic acid receptor responder (tazarotene induced) 2	RARRES2	2	20	2.5231	0.0308659	RARRES2	ENSG00000106538	ENST00000223271,ENST00000466675,ENST00000482669	ENSP00000223271,ENSP00000418009,ENSP00000418483	Q99969
0.0442581	Coronary_vascular_disease_CVD_PGS004514	acid phosphatase 5, tartrate resistant	acid phosphatase 5, tartrate resistant	acid phosphatase 5, tartrate resistant	2	20	-2.4918	0.075124	ACP5	ENSG00000102575	ENST00000218758,ENST00000412435,ENST00000592828,ENST00000433365	ENSP00000218758,ENSP00000392374,ENSP00000468767,ENSP00000413456	P13686
0.0466653	Alzheimer_disease_late_onset_PGS000053	3-methoxytyrosine	3-methoxytyrosine	3-methoxytyrosine	2	20	2.50678	0.051577
0.0467163	Coronary_atherosclerosis_PGS002048	serpin peptidase inhibitor, clade E (nexin, plasminogen activator inhibitor type 1), member 1	serpin peptidase inhibitor, clade e, member 1	SERPINE1	2	20	-2.48267	0.0823046	SERPINE1	ENSG00000106366	ENST00000223095,ENST00000445463	ENSP00000223095,ENSP00000396766	P05121
0.0468287	T2D_cases_vs_HbA1c_filtered_controls_PGS000712	sphingomyelin (d18:1/18:1, d18:2/18:0)	sphingomyelin (d18:1/18:1, d18:2/18:0)	sphingomyelin (d18:1/18:1, d18:2/18:0)	2	20	2.50007	0.0538524
0.0470224	T2D_cases_vs_HbA1c_filtered_controls_PGS000712	malate	malate	malate	2	20	-2.50188	0.0459167
0.0469096	Alzheimer_disease_late_onset_PGS000053	X - 23639	x - 23639	x - 23639	2	20	2.51657	0.0235156
0.0467117	Timmers_lifespan	mannose	mannose	mannose	2	20	-2.51923	0.0155933
0.0466239	Timmers_lifespan	orotidine	orotidine	orotidine	2	20	2.50781	0.0312167
0.0474152	Type_2_diabetes_SNPs_insulin_action_PGS000850	lactate	lactate	lactate	2	20	2.51978	0.0078361
0.0472475	Timmers_longevity	1-stearoyl-2-docosapentaenoyl-GPC (18:0/22:5n3)*	1-stearoyl-2-docosapentaenoyl-gpc (18:0/22:5n3)*	GPC(18:0/22:5n3)	2	20	-2.49635	0.0380859
0.0469466	Coronary_artery_disease_PGS004941	N-methylproline	n-methylproline	n-methylproline	2	20	-2.4911	0.0454991
0.0473083	mvAge	orotate	orotate	orotate	2	20	2.50687	0.00768602
0.0479839	Coronary_artery_disease_PGS004941	X - 18901	x - 18901	x - 18901	2	20	2.4897	0.0283645
0.0481247	frailty	pregnenolone sulfate	pregnenolone sulfate	pregnenolone sulfate	2	20	-2.49062	0.023806
0.046032	Coronary_artery_disease_PGS004941	orotidine	orotidine	orotidine	2	20	-2.49051	0.0233228
0.0477341	Timmers_healthspan	X - 12798	x - 12798	x - 12798	2	20	2.50279	0
0.0488288	HDL_cholesterol_PGS002781	chemokine (C-C motif) ligand 19	chemokine (c-c motif) ligand 19	chemokine (c-c motif) ligand 19	2	20	-2.48532	0.00747331	CCL19	ENSG00000172724	ENST00000311925	ENSP00000308815	Q99731
0.0490028	Coronary_artery_disease_PGS004941	N-acetylglutamine	n-acetylglutamine	n-acetylglutamine	2	20	-2.4845	0.00769913
0.0469295	Timmers_healthspan	metabolonic lactone sulfate	metabolonic lactone sulfate	metabolonic lactone sulfate	2	20	2.48674	0
0.048513	Parkinson_disease_PGS000903	X - 17351	x - 17351	x - 17351	2	20	-2.46767	0.0257139
0.049194	Type_2_diabetes_SNPs_insulin_action_secretion_PGS000851	trans-4-hydroxyproline	trans-4-hydroxyproline	trans-4-hydroxyproline	2	20	-2.48039	0.00754981
0.0494899	Alzheimers_PGS002753	chemokine (C-X-C motif) ligand 1 (melanoma growth stimulating activity, alpha)	chemokine (c-x-c motif) ligand 1 (melanoma growth stimulating activity, alpha)	CXCL1	2	20	-2.46782	0.0148946	CXCL1	ENSG00000163739	ENST00000395761	ENSP00000379110	P09341
0.0494899	Alzheimers_PGS002753	chemokine (C-X-C motif) ligand 1 (melanoma growth stimulating activity, alpha)	chemokine (c-x-c motif) ligand 1 (melanoma growth stimulating activity, alpha)	CXCL1	2	20	-2.46782	0.0148946	CXCL1	ENSG00000163739	ENST00000395761	ENSP00000379110	P09341
0.0475849	Longevity_PGS000906	ethylmalonate	ethylmalonate	ethylmalonate	2	20	-2.45236	0.0367528
0.0488883	HDL_cholesterol_PGS002781	1-margaroyl-2-oleoyl-GPC (17:0/18:1)*	1-margaroyl-2-oleoyl-gpc (17:0/18:1)*	1-margaroyl-2-oleoyl-gpc (17:0/18:1)*	2	20	2.47835	0
0.0494377	Coronary_atherosclerosis_PGS002048	5alpha-pregnan-3beta,20alpha-diol disulfate	5alpha-preg-3b,20a-diol MS	5Œ±-Preg-DS	2	20	-2.46979	0
0.0478692	HDL_cholesterol_PGS002781	carotene diol (3)	carotene diol (3)	carotene diol (3)	2	20	2.46311	0.00779023
0.0496934	Timmers_longevity	N-acetyltaurine	n-acetyltaurine	n-acetyltaurine	2	20	-2.4653	0
0.0499003	frailty	chemokine (C-C motif) ligand 3	chemokine (c-c motif) ligand 3	chemokine (c-c motif) ligand 3	2	20	2.45923	0.00741615	CCL3	ENSG00000006075	ENST00000225245	ENSP00000225245	P10147
0.0499003	frailty	chemokine (C-C motif) ligand 3	chemokine (c-c motif) ligand 3	chemokine (c-c motif) ligand 3	2	20	2.45923	0.00741615	CCL3	ENSG00000006075	ENST00000225245	ENSP00000225245	P10147
0.048339	Alzheimers_PGS002753	N-acetyltaurine	n-acetyltaurine	n-acetyltaurine	2	20	2.45814	0.00748914
0.0483614	HDL_cholesterol_PGS002781	1-(1-enyl-palmitoyl)-2-oleoyl-GPE (P-16:0/18:1)*	1-(1-enyl-palmitoyl)-2-oleoyl-gpe (p-16:0/18:1)*	GPE(p-16:0/18:1)	2	20	2.44252	0.0290067
0.0494321	Alzheimer_disease_late_onset_PGS000053	adenine	adenine	adenine	2	20	2.43346	0.00729051
0.0256855	Coronary_atherosclerosis_PGS002048	4-vinylphenol sulfate	4-vinylphenol sulfate	4-vinylphenol sulfate	1	10	3.08844
0.0256913	Cardiovascular_disease_PGS002316	5alpha-pregnan-3beta,20alpha-diol disulfate	5alpha-preg-3b,20a-diol MS	5Œ±-Preg-DS	1	10	-3.07632
0.0266374	T2D_cases_vs_HbA1c_filtered_controls_PGS000712	oxalate (ethanedioate)	oxalate (ethanedioate)	oxalate (ethanedioate)	1	10	-3.03415
0.0290253	frailty	2,3-dihydroxyisovalerate	2,3-dihydroxyisovalerate	2,3-dihydroxyisovalerate	1	10	-3.0072
0.0299168	Timmers_healthspan	A/G RATIO	a/g ratio	a/g ratio	1	10	-2.99811
0.0280447	Type_2_diabetes_SNPs_insulin_action_secretion_PGS000851	selectin E	selectin e	selectin e	1	10	-2.98789		SELE	ENSG00000007908	ENST00000333360	ENSP00000331736	P16581
0.0302397	mvAge	2-aminophenol sulfate	2-aminophenol sulfate	2-aminophenol sulfate	1	10	2.97603
0.03003	Type_2_diabetes_SNPs_insulin_action_PGS000850	N-formylmethionine	n-formylmethionine	n-formylmethionine	1	10	-2.96398
0.0310803	Alzheimer_disease_late_onset_PGS000053	X - 24728	x - 24728	x - 24728	1	10	-2.95541
0.0296277	frailty	BUN/CREAT RATIO	bun/creat ratio	bun/creat ratio	1	10	2.93519
0.0302852	amyotrophic_lateral_sclerosis	osteoclast associated, immunoglobulin-like receptor	osteoclast associated, immunoglobulin-like receptor	OSCAR	1	10	2.91459		OSCAR	ENSG00000170909,ENSG00000271658,ENSG00000273074	ENST00000391761,ENST00000356532,ENST00000359649,ENST00000358375,ENST00000351806,ENST00000284648,ENST00000604323,ENST00000605761,ENST00000573655,ENST00000576430,ENST00000572943,ENST00000571840,ENST00000570944,ENST00000571211	ENSP00000375641,ENSP00000348927,ENSP00000352671,ENSP00000351145,ENSP00000304523,ENSP00000365808,ENSP00000474338,ENSP00000474934,ENSP00000460337,ENSP00000460314,ENSP00000459649,ENSP00000460942,ENSP00000460784,ENSP00000460281	Q8IYS5
0.0310231	amyotrophic_lateral_sclerosis	ALKALINE PHOSPHATASE	alkaline phosphatase	alkaline phosphatase	1	10	-2.90872
0.0335943	T2D_cases_vs_HbA1c_filtered_controls_PGS000712	N-acetylarginine	n-acetylarginine	n-acetylarginine	1	10	2.87276
0.0321491	T2D_cases_vs_HbA1c_filtered_controls_PGS000712	HOMOCYSTEINE, SERUM	homocysteine, serum	homocysteine, serum	1	10	-2.87168
0.0324668	Type_2_diabetes_SNPs_insulin_action_secretion_PGS000851	glycosyl-N-behenoyl-sphingadienine (d18:2/22:0)*	glycosyl-n-behenoyl-sphingadienine (d18:2/22:0)*	glycosyl-n-behenoyl-sphingadienine (d18:2/22:0)*	1	10	-2.8618
0.032955	T2D_cases_vs_HbA1c_filtered_controls_PGS000712	palmitoyl-oleoyl-glycerol (16:0/18:1) [1]*	palmitoyl-oleoyl-glycerol (16:0/18:1) [1]*	POG(16:0/18:1)[1]	1	10	2.84649
0.0346282	Coronary_atherosclerosis_PGS002048	myo-inositol	myo-inositol	myo-inositol	1	10	-2.82918
0.0360787	T2D_cases_vs_HbA1c_filtered_controls_PGS000712	methyl-4-hydroxybenzoate sulfate	methyl-4-hydroxybenzoate sulfate	methyl-4-hydroxybenzoate sulfate	1	10	2.81272
0.0343091	Timmers_healthspan	X - 17340	x - 17340	x - 17340	1	10	-2.80254
0.036358	Heart_failure_PGS001790	mannitol/sorbitol	mannitol/sorbitol	mannitol/sorbitol	1	10	2.79576
0.0360335	Alzheimers_PGS002753	selectin P ligand	selectin p ligand	selectin p ligand	1	10	2.79374		SELPLG	ENSG00000110876	ENST00000550948,ENST00000228463,ENST00000388962	ENSP00000447752,ENSP00000228463,ENSP00000373614	Q14242
0.0346938	Timmers_longevity	fatty acid binding protein 6, ileal	fatty acid binding protein 6, ileal	fatty acid binding protein 6, ileal	1	10	-2.79029		FABP6	ENSG00000170231	ENST00000393980,ENST00000402432,ENST00000393982	ENSP00000377549,ENSP00000385433,ENSP00000377551	P51161
0.0365918	Parkinson_disease_PGS000903	acisoga	acisoga	acisoga	1	10	-2.78994
0.0361956	Parkinson_disease_PGS000903	cholate	cholate	cholate	1	10	2.78071
0.0368764	Parkinson_disease_PGS000903	X - 21467	x - 21467	x - 21467	1	10	-2.77951
0.0371953	Coronary_artery_disease_PGS004941	ergothioneine	ergothioneine	ergothioneine	1	10	2.77512
0.0354413	Coronary_artery_disease_PGS004941	OMEGA_6_TOTAL	omega_6_total	omega_6_total	1	10	-2.77389
0.0353552	LDL_cholesterol_PGS003873	CARBON DIOXIDE (CO2)	carbon dioxide (co2)	carbon dioxide (co2)	1	10	2.77377
0.0359253	Timmers_lifespan	androstenediol (3beta,17beta) monosulfate (1)	androstenediol (3beta,17beta) monosulfate (1)	Androstenediol-3b17b-MS-1	1	10	-2.76085
0.0378108	Timmers_longevity	X - 16087	x - 16087	x - 16087	1	10	2.75898
0.0361521	amyotrophic_lateral_sclerosis	TRIGLYCERIDES	triglycerides	triglycerides	1	10	-2.75286
0.0362193	Type_2_diabetes_SNPs_insulin_action_secretion_PGS000851	arachidate (20:0)	arachidate (20:0)	arachidate (20:0)	1	10	-2.751
0.0383568	Coronary_artery_disease_PGS004941	TRIGLYCERIDES	triglycerides	triglycerides	1	10	-2.74567
0.0379009	Heart_failure_PGS001790	homocitrulline	homocitrulline	homocitrulline	1	10	-2.7446
0.0380913	frailty	5alpha-androstan-3alpha,17beta-diol monosulfate (1)	5alpha-androstan-3alpha,17beta-diol monosulfate (1)	5a-Androstan-3a17b-DS	1	10	2.73944
0.0379703	Coronary_atherosclerosis_PGS002048	hexanoylglutamine	hexanoylglutamine	hexanoylglutamine	1	10	2.73774
0.0387425	Type_2_diabetes_SNPs_insulin_action_PGS000850	chemokine (C-C motif) ligand 13	chemokine(c-c motif)ligand13	chemokine (c-c motif) ligand 13	1	10	2.73405		CCL13	ENSG00000181374	ENST00000225844	ENSP00000225844	Q99616
0.0369959	Longevity_PGS000906	X - 11483	x - 11483	x - 11483	1	10	2.72867
0.039185	Longevity_PGS000906	1-palmityl-2-oleoyl-GPC (O-16:0/18:1)*	1-palmityl-2-oleoyl-gpc (o-16:0/18:1)*	1-palmityl-2-oleoyl-gpc (o-16:0/18:1)*	1	10	-2.72761
0.0391399	LDL_cholesterol_PGS003873	metabolonic lactone sulfate	metabolonic lactone sulfate	metabolonic lactone sulfate	1	10	-2.72705
0.0370754	Coronary_vascular_disease_CVD_PGS004514	X - 11795	x - 11795	x - 11795	1	10	2.72705
0.0392802	HDL_cholesterol_PGS002781	low density lipoprotein receptor	low density lipoprotein receptor	low density lipoprotein receptor	1	10	2.72498		LDLR	ENSG00000130164	ENST00000558518,ENST00000455727,ENST00000535915,ENST00000545707,ENST00000558013	ENSP00000454071,ENSP00000397829,ENSP00000440520,ENSP00000437639,ENSP00000453346	P01130
0.0371287	Cardiovascular_disease_PGS002316	artemin	artemin	artemin	1	10	2.72258		ARTN	ENSG00000117407	ENST00000372359,ENST00000498139,ENST00000372354,ENST00000438616,ENST00000414809	ENSP00000361434,ENSP00000436727,ENSP00000361429,ENSP00000391998,ENSP00000387435	Q5T4W7
0.0394376	T2D_cases_vs_HbA1c_filtered_controls_PGS000712	linoleoyl-arachidonoyl-glycerol (18:2/20:4) [1]*	linoleoyl-arachidonoyl-glycerol (18:2/20:4) [1]*	linoleoyl-arachidonoyl-glycerol (18:2/20:4) [1]*	1	10	2.71717
0.0396754	Parkinson_disease_PGS000903	Fc fragment of IgG, low affinity IIb, receptor (CD32)	cd32	CD32	1	10	2.71206		FCGR2B	ENSG00000072694	ENST00000236937,ENST00000367961,ENST00000358671,ENST00000367962,ENST00000367960,ENST00000403078	ENSP00000236937,ENSP00000356938,ENSP00000351497,ENSP00000356939,ENSP00000356937,ENSP00000386038	P31994
0.0378614	Timmers_longevity	interleukin 6 receptor	interleukin 6 receptor	interleukin 6 receptor	1	10	-2.71046		IL6R	ENSG00000160712	ENST00000368485,ENST00000344086	ENSP00000357470,ENSP00000340589	P08887
0.0397472	Alzheimers_PGS002753	2-hydroxyhippurate (salicylurate)	2-hydroxyhippurate	2-hydroxyhippurate (salicylurate)	1	10	2.7102
0.0392342	Parkinson_disease_PGS000903	3-amino-2-piperidone	3-amino-2-piperidone	3-amino-2-piperidone	1	10	2.70555
0.0399498	Coronary_atherosclerosis_PGS002048	X - 11261	x - 11261	x - 11261	1	10	2.70316
0.0381914	Timmers_longevity	X - 24243	x - 24243	x - 24243	1	10	2.70128
0.0377248	Alzheimer_disease_late_onset_PGS000053	heat shock 27kDa protein 1	heat shock 27kda protein 1	heat shock 27kda protein 1	1	10	2.69928		HSPB1	ENSG00000106211	ENST00000248553	ENSP00000248553	P04792
0.0382704	Type_2_diabetes_SNPs_insulin_action_secretion_PGS000851	mannose	mannose	mannose	1	10	2.69512
0.0380133	Timmers_longevity	MEAN_ARTERIAL_BLOOD_PRESSURE	mean_arterial_blood_pressure	mean_arterial_blood_pressure	1	10	-2.69232
0.0404412	Direct_bilirubin_umol_L_PGS000681	gamma-glutamylphenylalanine	gamma-glutamylphenylalanine	gamma-glutamylphenylalanine	1	10	-2.69083
0.0402652	Direct_bilirubin_umol_L_PGS000681	1-linoleoyl-2-linolenoyl-GPC (18:2/18:3)*	1-linoleoyl-2-linolenoyl-gpc (18:2/18:3)*	1-linoleoyl-2-linolenoyl-gpc (18:2/18:3)*	1	10	2.6894
0.0386323	frailty	2-oleoyl-GPE (18:1)*	2-oleoyl-gpe (18:1)*	2-oleoyl-gpe (18:1)*	1	10	-2.68529
0.0387351	T2D_cases_vs_HbA1c_filtered_controls_PGS000712	DHA	dha	dha	1	10	2.68383
0.0384767	T2D_cases_vs_HbA1c_filtered_controls_PGS000712	SODIUM	sodium	sodium	1	10	2.68124
0.038935	Timmers_longevity	1-stearoyl-2-docosapentaenoyl-GPC (18:0/22:5n6)*	1-stearoyl-2-docosapentaenoyl-gpc (18:0/22:5n6)*	GPC(18:0/22:5n6)	1	10	-2.68119
0.0408951	Coronary_artery_disease_PGS004941	CD4 molecule	cd4 molecule	cd4 molecule	1	10	-2.68102		CD4	ENSG00000010610,ENSG00000268779	ENST00000011653,ENST00000594128	ENSP00000011653,ENSP00000469397	P01730
0.0407241	Longevity_PGS000906	advanced glycosylation end product-specific receptor	advanced glycosylation end product-specific receptor	RAGE	1	10	-2.67815		AGER	ENSG00000206320,ENSG00000234729,ENSG00000237405,ENSG00000231268,ENSG00000229058,ENSG00000204305,ENSG00000230514	ENST00000383279,ENST00000383275,ENST00000451115,ENST00000551254,ENST00000547328,ENST00000441180,ENST00000453588,ENST00000436456,ENST00000550562,ENST00000548464,ENST00000441804,ENST00000432831,ENST00000447921,ENST00000551827,ENST00000551381,ENST00000427822,ENST00000412470,ENST00000449037,ENST00000456918,ENST00000547651,ENST00000549758,ENST00000375067,ENST00000375055,ENST00000375076,ENST00000438221…	ENSP00000372766,ENSP00000372762,ENSP00000401068,ENSP00000449226,ENSP00000448579,ENSP00000388462,ENSP00000399686,ENSP00000397227,ENSP00000446835,ENSP00000450134,ENSP00000391743,ENSP00000413391,ENSP00000395812,ENSP00000449042,ENSP00000448979,ENSP00000416042,ENSP00000387853,ENSP00000400667,ENSP00000409457,ENSP00000449708,ENSP00000447301,ENSP00000364208,ENSP00000364195,ENSP00000364217,ENSP00000387887…	Q15109
0.0408054	Coronary_artery_disease_PGS004941	X - 21319	x - 21319	x - 21319	1	10	-2.67788
0.0409556	Parkinson_disease_PGS000903	CD163 molecule	cd163 molecule	cd163 molecule	1	10	2.67415		CD163	ENSG00000177575	ENST00000359156,ENST00000432237	ENSP00000352071,ENSP00000403885	Q86VB7
0.0410994	amyotrophic_lateral_sclerosis	X - 21383	x - 21383	x - 21383	1	10	2.67324
0.041197	Timmers_lifespan	beta-alanine	beta-alanine	beta-alanine	1	10	2.6713
0.0410949	Alzheimer_disease_late_onset_PGS000053	sphingomyelin (d18:1/14:0, d16:1/16:0)*	sphingomyelin (d18:1/14:0, d16:1/16:0)*	sphingomyelin (d18:1/14:0, d16:1/16:0)*	1	10	-2.67049
0.0394886	amyotrophic_lateral_sclerosis	LINOLEIC_ACID	linoleic_acid	linoleic_acid	1	10	2.66849
0.0413608	Timmers_healthspan	1-linoleoyl-GPG (18:2)*	1-linoleoyl-gpg (18:2)*	1-linoleoyl-gpg (18:2)*	1	10	-2.66824
0.0413127	Heart_failure_PGS001790	Fc fragment of IgG, low affinity IIb, receptor (CD32)	cd32	CD32	1	10	-2.66419		FCGR2B	ENSG00000072694	ENST00000236937,ENST00000367961,ENST00000358671,ENST00000367962,ENST00000367960,ENST00000403078	ENSP00000236937,ENSP00000356938,ENSP00000351497,ENSP00000356939,ENSP00000356937,ENSP00000386038	P31994
0.0394631	frailty	HDL PARTICLE NUMBER	hdl particle number	hdl particle number	1	10	2.66259
0.0414044	Timmers_lifespan	N-stearoyl-sphinganine (d18:0/18:0)*	n-stearoyl-sphinganine (d18:0/18:0)*	n-stearoyl-sphinganine (d18:0/18:0)*	1	10	2.66198
0.0397696	T2D_cases_vs_HbA1c_filtered_controls_PGS000712	aconitate [cis or trans]	aconitate [cis or trans]	aconitate [cis or trans]	1	10	-2.66042
0.039325	Coronary_atherosclerosis_PGS002048	O-sulfo-L-tyrosine	o-sulfo-l-tyrosine	o-sulfo-l-tyrosine	1	10	2.65961
0.0396157	LDL_cholesterol_PGS003873	chemokine (C-C motif) ligand 2	chemokine (c-c motif) ligand 2	chemokine (c-c motif) ligand 2	1	10	2.62861	0.0423658	CCL2	ENSG00000108691	ENST00000225831	ENSP00000225831	P13500
0.0396157	LDL_cholesterol_PGS003873	chemokine (C-C motif) ligand 2	chemokine (c-c motif) ligand 2	chemokine (c-c motif) ligand 2	1	10	2.62861	0.0423658	CCL2	ENSG00000108691	ENST00000225831	ENSP00000225831	P13500
0.0394316	Type_2_diabetes_SNPs_insulin_action_secretion_PGS000851	retinol (Vitamin A)	retinol (vitamin a)	retinol (vitamin a)	1	10	2.65798
0.041842	Type_2_diabetes_SNPs_insulin_action_PGS000850	matrix metallopeptidase 9 (gelatinase B, 92kDa gelatinase, 92kDa type IV collagenase)	matrix metallopeptidase 9 (gelatinase b, 92kda gelatinase, 92kda type iv collagenase)	MMP9	1	10	-2.65776		MMP9	ENSG00000100985	ENST00000372330	ENSP00000361405	P14780
0.0414728	Timmers_longevity	pregnenediol sulfate (C21H34O5S)*	pregnenediol sulfate (c21h34o5s)*	pregnenediol sulfate (c21h34o5s)*	1	10	-2.65425
0.0396304	amyotrophic_lateral_sclerosis	chemokine (C-C motif) ligand 25	chemokine (c-c motif) ligand 25	chemokine (c-c motif) ligand 25	1	10	2.65292		CCL25	ENSG00000131142	ENST00000253451,ENST00000390669	ENSP00000253451,ENSP00000375086	O15444
0.0415683	Coronary_atherosclerosis_PGS002048	1-pentadecanoyl-GPC (15:0)*	1-pentadecanoyl-gpc (15:0)*	1-pentadecanoyl-gpc (15:0)*	1	10	2.65226
0.0419952	Timmers_longevity	myeloperoxidase	myeloperoxidase	myeloperoxidase	1	10	2.64795		MPO	ENSG00000005381	ENST00000225275,ENST00000340482	ENSP00000225275,ENSP00000344419	P05164
0.0402528	Alzheimers_PGS002753	BUN/CREAT RATIO	bun/creat ratio	bun/creat ratio	1	10	-2.64727
0.0399469	LDL_cholesterol_PGS003873	fibroblast growth factor 5	fibroblast growth factor 5	fibroblast growth factor 5	1	10	-2.64634		FGF5	ENSG00000138675	ENST00000456523,ENST00000312465	ENSP00000398353,ENSP00000311697	Q8NF90
0.0402479	Longevity_PGS000906	glycosyl ceramide (d18:2/24:1, d18:1/24:2)*	glycosyl ceramide (d18:2/24:1, d18:1/24:2)*	glycosyl ceramide (d18:2/24:1, d18:1/24:2)*	1	10	-2.63987
0.0403781	HDL_cholesterol_PGS002781	alanyl (membrane) aminopeptidase	alanyl (membrane) aminopeptidase	alanyl (membrane) aminopeptidase	1	10	2.63745		ANPEP	ENSG00000166825	ENST00000300060	ENSP00000300060	P15144
0.0404346	Parkinson_disease_PGS000903	secreted phosphoprotein 1	secreted phosphoprotein 1	secreted phosphoprotein 1	1	10	2.63745		SPP1	ENSG00000118785	ENST00000237623,ENST00000395080,ENST00000360804	ENSP00000237623,ENSP00000378517,ENSP00000354042	P10451
0.0404429	Alzheimers_PGS002753	MEAN_ARTERIAL_BLOOD_PRESSURE	mean_arterial_blood_pressure	mean_arterial_blood_pressure	1	10	-2.63608
0.0424898	Heart_failure_PGS001790	orotidine	orotidine	orotidine	1	10	-2.63494
0.0426686	Alzheimer_disease_late_onset_PGS000053	branched-chain, straight-chain, or cyclopropyl 10:1 fatty acid (1)*	branched-chain, straight-chain, or cyclopropyl 10:1 fatty acid (1)*	FA(10:1)	1	10	-2.63147
0.0407593	Type_2_diabetes_SNPs_insulin_action_secretion_PGS000851	indoleacetate	indoleacetate	indoleacetate	1	10	2.63019
0.0426507	Type_2_diabetes_SNPs_insulin_action_PGS000850	oleoylcholine	oleoylcholine	oleoylcholine	1	10	-2.62931
0.0407659	Longevity_PGS000906	LDL_SIZE	ldl_size	ldl_size	1	10	2.6288
0.0408044	amyotrophic_lateral_sclerosis	iduronidase, alpha-L-	iduronidase, alpha-l-	iduronidase, alpha-l-	1	10	2.62857		IDUA	ENSG00000127415	ENST00000247933	ENSP00000247933	P35475
0.0428147	Parkinson_disease_PGS000903	tumor necrosis factor receptor superfamily, member 1A	tnf receptor superfamily, member 1a	TNFRSF1A	1	10	-2.62547		TNFRSF1A	ENSG00000067182	ENST00000162749,ENST00000366159	ENSP00000162749,ENSP00000380389	P19438
0.0426898	Coronary_vascular_disease_CVD_PGS004514	fibroblast growth factor 5	fibroblast growth factor 5	fibroblast growth factor 5	1	10	-2.62547		FGF5	ENSG00000138675	ENST00000456523,ENST00000312465	ENSP00000398353,ENSP00000311697	Q8NF90
0.042713	Coronary_atherosclerosis_PGS002048	ascorbic acid 3-sulfate*	ascorbic acid 3-sulfate*	ascorbic acid 3-sulfate*	1	10	2.62532
0.0430014	Type_2_diabetes_SNPs_insulin_action_PGS000850	chemokine (C-X3-C motif) ligand 1	chemokine (c-x3-c motif) ligand 1	chemokine (c-x3-c motif) ligand 1	1	10	-2.62144		CX3CL1	ENSG00000006210	ENST00000006053	ENSP00000006053	P78423
0.042887	Type_2_diabetes_SNPs_insulin_action_PGS000850	signaling lymphocytic activation molecule family member 1	slamf1	SLAMF1	1	10	-2.62144		SLAMF1	ENSG00000117090	ENST00000302035,ENST00000235739	ENSP00000306190,ENSP00000235739	Q13291
0.0412008	HDL_cholesterol_PGS002781	1-(1-enyl-palmitoyl)-2-linoleoyl-GPC (P-16:0/18:2)*	1-(1-enyl-palmi)-2-lino-gpc(p-16:0/18:2)*	GPC(p-16:0/18:2)	1	10	2.62043
0.0431192	Timmers_healthspan	alanine	alanine	alanine	1	10	-2.61797
0.0412683	Timmers_lifespan	BMI_CALC	bmi_calc	bmi_calc	1	10	-2.61546
0.0433599	Type_2_diabetes_SNPs_insulin_action_PGS000850	X - 17690	x - 17690	x - 17690	1	10	2.61322
0.0414419	Timmers_longevity	urate	urate	urate	1	10	-2.61089
0.0435183	Parkinson_disease_PGS000903	propionylglycine	propionylglycine	propionylglycine	1	10	-2.60956
0.043324	Timmers_healthspan	integrin beta 1 binding protein (melusin) 2	integrin beta 1 binding protein (melusin) 2	ITGB1BP2	1	10	2.60797		ITGB1BP2	ENSG00000147166	ENST00000373829	ENSP00000362935	Q9UKP3
0.0416766	Alzheimer_disease_late_onset_PGS000053	INSULIN	insulin	insulin	1	10	2.60621
0.0416889	Longevity_PGS000906	oxidized low density lipoprotein (lectin-like) receptor 1	oxidized low density lipoprotein (lectin-like) receptor 1	OxLDL_R1	1	10	-2.6059		OLR1	ENSG00000173391	ENST00000309539,ENST00000545927,ENST00000432556	ENSP00000309124,ENSP00000439251,ENSP00000405116	P78380
0.0417258	Type_2_diabetes_SNPs_insulin_action_PGS000850	N1-Methyl-2-pyridone-5-carboxamide	n1-methyl-2-pyridone-5-carboxamide	n1-methyl-2-pyridone-5-carboxamide	1	10	2.6056
0.0417504	amyotrophic_lateral_sclerosis	transforming growth factor, alpha	transforming growth factor, alpha	transforming growth factor, alpha	1	10	-2.60472		TGFA	ENSG00000163235,ENSG00000272517	ENST00000295400,ENST00000445399,ENST00000418333,ENST00000607651,ENST00000607808,ENST00000606814	ENSP00000295400,ENSP00000387493,ENSP00000404099,ENSP00000475235,ENSP00000475945,ENSP00000475689	P01135
0.0417504	amyotrophic_lateral_sclerosis	transforming growth factor, alpha	transforming growth factor, alpha	transforming growth factor, alpha	1	10	-2.60472		TGFA	ENSG00000163235,ENSG00000272517	ENST00000295400,ENST00000445399,ENST00000418333,ENST00000607651,ENST00000607808,ENST00000606814	ENSP00000295400,ENSP00000387493,ENSP00000404099,ENSP00000475235,ENSP00000475945,ENSP00000475689	P01135
0.0439001	mvAge	docosahexaenoylcholine	docosahexaenoylcholine	docosahexaenoylcholine	1	10	-2.60314
0.0419591	T2D_cases_vs_HbA1c_filtered_controls_PGS000712	glycochenodeoxycholate glucuronide (1)	glycochenodeoxycholate glucuronide (1)	glycochenodeoxycholate glucuronide (1)	1	10	2.59869
0.0441498	Heart_failure_PGS001790	cis-4-decenoylcarnitine (C10:1)	cis-4-decenoylcarnitine (c10:1)	cis-4-decenoylcarnitine (c10:1)	1	10	-2.59411
0.0441656	amyotrophic_lateral_sclerosis	deoxycholate	deoxycholate	deoxycholate	1	10	2.59276
0.0443062	Heart_failure_PGS001790	ALKALINE PHOSPHATASE	alkaline phosphatase	alkaline phosphatase	1	10	2.59268
0.0443905	T2D_cases_vs_HbA1c_filtered_controls_PGS000712	1,2-dipalmitoyl-GPC (16:0/16:0)	1,2-dipalmitoyl-gpc (16:0/16:0)	1,2-dipalmitoyl-gpc (16:0/16:0)	1	10	-2.59164
0.0443508	Coronary_artery_disease_PGS004941	X - 24337	x - 24337	x - 24337	1	10	2.59084
0.0424812	Coronary_vascular_disease_CVD_PGS004514	leukemia inhibitory factor receptor alpha	leukemia inhibitory factor receptor alpha	leukemia inhibitory factor receptor alpha	1	10	-2.59027		LIFR	ENSG00000113594	ENST00000263409,ENST00000453190	ENSP00000263409,ENSP00000398368	P42702
0.0424221	Longevity_PGS000906	glycerophosphoethanolamine	glycerophosphoethanolamine	glycerophosphoethanolamine	1	10	2.58891
0.0445265	HDL_cholesterol_PGS002781	X - 23314	x - 23314	x - 23314	1	10	2.58649
0.0425191	Parkinson_disease_PGS000903	1-(1-enyl-palmitoyl)-2-docosahexaenoyl-GPC (P-16:0/22:6)*	1-(1-enyl-palmitoyl)-2-docosahexaenoyl-gpc (p-16:0/22:6)*	1-(1-enyl-palmitoyl)-2-docosahexaenoyl-gpc (p-16:0/22:6)*	1	10	2.58646
0.0446497	Direct_bilirubin_umol_L_PGS000681	CD6 molecule	cd6 molecule	cd6 molecule	1	10	-2.586		CD6	ENSG00000013725	ENST00000313421,ENST00000352009,ENST00000452451	ENSP00000323280,ENSP00000340628,ENSP00000390676	Q8WWJ7
0.0447815	HDL_cholesterol_PGS002781	methionine	methionine	methionine	1	10	2.58318
0.0447307	Longevity_PGS000906	bone morphogenetic protein 6	bone morphogenetic protein 6	bone morphogenetic protein 6	1	10	-2.58279		BMP6	ENSG00000153162	ENST00000283147	ENSP00000283147	P22004
0.0448162	T2D_cases_vs_HbA1c_filtered_controls_PGS000712	1-palmitoleoyl-2-linolenoyl-GPC (16:1/18:3)*	1-palm-2-lino-gpc(16:1/18:3)*	1-palmitoleoyl-2-linolenoyl-gpc (16:1/18:3)*	1	10	-2.58074
0.0449871	Parkinson_disease_PGS000903	3-methyl catechol sulfate (1)	3-methyl catechol sulfate (1)	3-methyl catechol sulfate (1)	1	10	2.57997
0.0449895	Timmers_healthspan	pyridoxate	pyridoxate	pyridoxate	1	10	-2.57884
0.0451072	Alzheimers_PGS002753	myristoleate (14:1n5)	myristoleate (14:1n5)	myristoleate (14:1n5)	1	10	2.57711
0.0447268	Heart_failure_PGS001790	5alpha-pregnan-3beta,20alpha-diol disulfate	5alpha-preg-3b,20a-diol MS	5Œ±-Preg-DS	1	10	2.57659
0.045135	Alzheimer_disease_late_onset_PGS000053	4-cholesten-3-one	4-cholesten-3-one	4-cholesten-3-one	1	10	-2.5755
0.0451531	Type_2_diabetes_SNPs_insulin_action_PGS000850	CD274 molecule	cd274 molecule	cd274 molecule	1	10	2.57472		CD274	ENSG00000120217	ENST00000381577,ENST00000381573	ENSP00000370989,ENSP00000370985	Q9NZQ7
0.0449212	Alzheimers_PGS002753	androsterone glucuronide	androsterone glucuronide	androsterone glucuronide	1	10	-2.57463
0.045456	Timmers_lifespan	phenylalanyltryptophan	phenylalanyltryptophan	phenylalanyltryptophan	1	10	2.56745
0.0453253	Alzheimer_disease_late_onset_PGS000053	N-terminal prohormone brain natriuretic peptide	n-terminal prohorm brain natriuretic pep	n-terminal prohormone brain natriuretic peptide	1	10	2.56738		NT-proBNP				NT-proBNP
0.0453253	Alzheimer_disease_late_onset_PGS000053	N-terminal prohormone brain natriuretic peptide	n-terminal prohorm brain natriuretic pep	n-terminal prohormone brain natriuretic peptide	1	10	2.56738		NT-proBNP				NT-proBNP
0.0452917	mvAge	chemokine (C-C motif) ligand 24	chemokine (c-c motif) ligand 24	chemokine (c-c motif) ligand 24	1	10	2.56738		CCL24	ENSG00000106178,ENSG00000262306	ENST00000222902,ENST00000416943,ENST00000573227,ENST00000576649	ENSP00000222902,ENSP00000400533,ENSP00000461512,ENSP00000461415	O00175
0.0453028	Direct_bilirubin_umol_L_PGS000681	2,3-dihydroxyisovalerate	2,3-dihydroxyisovalerate	2,3-dihydroxyisovalerate	1	10	2.56682
0.0435505	Alzheimers_PGS002753	interferon, gamma	interferon, gamma	interferon, gamma	1	10	-2.56658		IFNG	ENSG00000111537	ENST00000229135	ENSP00000229135	P01579
0.0453808	Coronary_atherosclerosis_PGS002048	decanoylcarnitine (C10)	decanoylcarnitine (c10)	decanoylcarnitine (c10)	1	10	2.56578
0.0455444	Coronary_artery_disease_PGS004941	S-allylcysteine	s-allylcysteine	s-allylcysteine	1	10	2.56495
0.0451459	Timmers_longevity	homoarginine	homoarginine	homoarginine	1	10	2.56495
0.0455911	Direct_bilirubin_umol_L_PGS000681	interleukin 22 receptor, alpha 1	interleukin 22RA1	interleukin 22 receptor, alpha 1	1	10	2.56335		IL22RA1	ENSG00000142677	ENST00000270800	ENSP00000270800	Q8N6P7
0.0436901	Type_2_diabetes_SNPs_insulin_action_PGS000850	interleukin 13	interleukin 13	interleukin 13	1	10	2.56333		IL13	ENSG00000169194	ENST00000304506	ENSP00000304915	P35225
0.045646	Timmers_longevity	2,3-dihydroxyisovalerate	2,3-dihydroxyisovalerate	2,3-dihydroxyisovalerate	1	10	-2.56307
0.043579	Parkinson_disease_PGS000903	gamma-glutamylvaline	gamma-glutamylvaline	gamma-glutamylvaline	1	10	2.5616
0.0455527	HDL_cholesterol_PGS002781	2-palmitoyl-GPC (16:0)*	2-palmitoyl-gpc (16:0)*	2-palmitoyl-gpc (16:0)*	1	10	-2.56085
0.0436147	Coronary_atherosclerosis_PGS002048	2-hydroxyhippurate (salicylurate)	2-hydroxyhippurate	2-hydroxyhippurate (salicylurate)	1	10	2.56067
0.0455852	Longevity_PGS000906	1-palmitoyl-GPC (16:0)	1-palmitoyl-gpc (16:0)	1-palmitoyl-gpc (16:0)	1	10	2.56008
0.0457608	Alzheimer_disease_late_onset_PGS000053	phenylpyruvate	phenylpyruvate	phenylpyruvate	1	10	-2.5592
0.0459097	amyotrophic_lateral_sclerosis	notch 3	notch 3	notch 3	1	10	-2.55845		NOTCH3	ENSG00000074181	ENST00000263388	ENSP00000263388	Q9UM47
0.0436981	Coronary_atherosclerosis_PGS002048	5alpha-androstan-3beta,17beta-diol disulfate	5alpha-androstan-3beta,17beta-diol disulfate	5a-Androstan-3b17b-DS	1	10	-2.55836
0.045562	Timmers_healthspan	S-allylcysteine	s-allylcysteine	s-allylcysteine	1	10	-2.55593
0.0457585	Alzheimers_PGS002753	1-palmityl-2-linoleoyl-GPC (O-16:0/18:2)*	1-palmityl-2-linoleoyl-gpc (o-16:0/18:2)*	1-palmityl-2-linoleoyl-gpc (o-16:0/18:2)*	1	10	2.55591
0.0457246	Alzheimer_disease_late_onset_PGS000053	trans-urocanate	trans-urocanate	trans-urocanate	1	10	-2.55425
0.0460987	Cardiovascular_disease_PGS002316	thrombospondin 2	thrombospondin 2	thrombospondin 2	1	10	2.55367		THBS2	ENSG00000186340	ENST00000366787	ENSP00000355751	P35442
0.0442532	Heart_failure_PGS001790	X - 11849	x - 11849	x - 11849	1	10	-2.55286
0.0462835	Type_2_diabetes_SNPs_insulin_action_PGS000850	delta-like 1 homolog (Drosophila)	delta-like 1 homolog (drosophila)	delta-like 1 homolog (drosophila)	1	10	-2.55205		DLK1	ENSG00000185559	ENST00000341267,ENST00000331224	ENSP00000340292,ENSP00000331081	P80370
0.0443123	frailty	eukaryotic translation initiation factor 4E binding protein 1	eukaryotic translation initiation factor 4e binding protein 1	EIF4EBP1	1	10	2.55191		EIF4EBP1	ENSG00000187840	ENST00000338825	ENSP00000340691	Q13541
0.0438772	Type_2_diabetes_SNPs_insulin_action_secretion_PGS000851	glucose	glucose	glucose	1	10	2.55109
0.0459741	LDL_cholesterol_PGS003873	S-allylcysteine	s-allylcysteine	s-allylcysteine	1	10	2.55098
0.0462335	Longevity_PGS000906	sulfate of piperine metabolite C16H19NO3 (3)*	sulfate of piperine metabolite c16h19no3 (3)*	sulfate of piperine metabolite c16h19no3 (3)*	1	10	2.55053
0.0460279	Cardiovascular_disease_PGS002316	ethylmalonate	ethylmalonate	ethylmalonate	1	10	-2.54945
0.0460378	Coronary_vascular_disease_CVD_PGS004514	X - 15469	x - 15469	x - 15469	1	10	2.54532
0.0442345	Longevity_PGS000906	carotene diol (2)	carotene diol (2)	carotene diol (2)	1	10	2.54511
0.0446652	frailty	CRP HIGH SENSITIVITY	crp high sensitivity	crp high sensitivity	1	10	2.5448
0.0465626	Coronary_artery_disease_PGS004941	X - 15486	x - 15486	x - 15486	1	10	-2.54428
0.0448403	Heart_failure_PGS001790	ARACHIDONIC ACID	arachidonic acid	arachidonic acid	1	10	2.54236
0.0466242	T2D_cases_vs_HbA1c_filtered_controls_PGS000712	phosphatidylcholine (15:0/18:1, 17:0/16:1, 16:0/17:1)*	phosphatidylcholine (15:0/18:1, 17:0/16:1, 16:0/17:1)*	PC(15:0/18:1...)	1	10	-2.54226
0.0444231	mvAge	mannose	mannose	mannose	1	10	-2.54226
0.0466865	Timmers_healthspan	1-palmitoylglycerol (16:0)	1-palmitoylglycerol (16:0)	1-palmitoylglycerol (16:0)	1	10	2.54181
0.0464561	Timmers_healthspan	2-naphthol sulfate	2-naphthol sulfate	2-naphthol sulfate	1	10	2.54132
0.046798	Coronary_artery_disease_PGS004941	ASAT (SGOT)	asat (sgot)	asat (sgot)	1	10	-2.53925
0.0468083	Coronary_vascular_disease_CVD_PGS004514	cyclo(pro-val)	cyclo(pro-val)	cyclo(pro-val)	1	10	2.5387
0.0462446	Parkinson_disease_PGS000903	1-stearoyl-2-docosapentaenoyl-GPE (18:0/22:5n6)*	1-stearoyl-2-docosapentaenoyl-gpe (18:0/22:5n6)*	GPE(18:0/22:5n6)	1	10	-2.53864
0.0446108	T2D_cases_vs_HbA1c_filtered_controls_PGS000712	methyl glucopyranoside (alpha + beta)	methyl glucopyranoside(alpha+beta)	methyl glucopyranoside (alpha + beta)	1	10	-2.53855
0.0467753	Longevity_PGS000906	serpin peptidase inhibitor, clade E (nexin, plasminogen activator inhibitor type 1), member 1	serpin peptidase inhibitor, clade e, member 1	SERPINE1	1	10	-2.5379		SERPINE1	ENSG00000106366	ENST00000223095,ENST00000445463	ENSP00000223095,ENSP00000396766	P05121
0.0449627	Parkinson_disease_PGS000903	1-stearyl-2-docosapentaenoyl-GPC (O-18:0/22:5n3)*	1-stearyl-2-docosapentaenoyl-gpc (o-18:0/22:5n3)*	GPC(o-18:0/22:5n3)	1	10	-2.53568
0.0467741	Coronary_vascular_disease_CVD_PGS004514	3-amino-2-piperidone	3-amino-2-piperidone	3-amino-2-piperidone	1	10	2.53505
0.0450734	Type_2_diabetes_SNPs_insulin_action_secretion_PGS000851	collagen, type I, alpha 1	collagen, type i, alpha 1	collagen, type i, alpha 1	1	10	-2.53467		COL1A1	ENSG00000108821	ENST00000225964	ENSP00000225964	P02452
0.0469814	Heart_failure_PGS001790	dodecenedioate (C12:1-DC)*	dodecenedioate (c12:1-dc)*	dodecenedioate (c12:1-dc)*	1	10	2.53443
0.0470025	Alzheimer_disease_late_onset_PGS000053	leukemia inhibitory factor receptor alpha	leukemia inhibitory factor receptor alpha	leukemia inhibitory factor receptor alpha	1	10	2.53386		LIFR	ENSG00000113594	ENST00000263409,ENST00000453190	ENSP00000263409,ENSP00000398368	P42702
0.0448677	Type_2_diabetes_SNPs_insulin_action_secretion_PGS000851	trimethylamine N-oxide	trimethylamine n-oxide	trimethylamine n-oxide	1	10	2.53352
0.0464291	T2D_cases_vs_HbA1c_filtered_controls_PGS000712	tumor necrosis factor receptor superfamily, member 13B	tumor necrosis factor receptor superfamily, member 13b	tumor necrosis factor receptor superfamily, member 13b	1	10	2.53305		TNFRSF13B	ENSG00000240505	ENST00000261652,ENST00000583789	ENSP00000261652,ENSP00000462952	O14836
0.0449491	Timmers_healthspan	X - 11378	x - 11378	x - 11378	1	10	2.53202
0.0470598	Timmers_healthspan	succinate	succinate	succinate	1	10	2.53155
0.0465375	Timmers_healthspan	uridine	uridine	uridine	1	10	2.53154
0.0465699	T2D_cases_vs_HbA1c_filtered_controls_PGS000712	piperine	piperine	piperine	1	10	2.53112
0.0472051	Direct_bilirubin_umol_L_PGS000681	CHLORIDE	chloride	chloride	1	10	-2.53016
0.0472023	Coronary_atherosclerosis_PGS002048	iduronidase, alpha-L-	iduronidase, alpha-l-	iduronidase, alpha-l-	1	10	-2.5298		IDUA	ENSG00000127415	ENST00000247933	ENSP00000247933	P35475
0.046733	mvAge	N-acetyltyrosine	n-acetyltyrosine	n-acetyltyrosine	1	10	2.52943
0.0453063	Alzheimer_disease_late_onset_PGS000053	X - 23739	x - 23739	x - 23739	1	10	-2.52823
0.0451115	LDL_cholesterol_PGS003873	1-(1-enyl-palmitoyl)-2-linoleoyl-GPC (P-16:0/18:2)*	1-(1-enyl-palmi)-2-lino-gpc(p-16:0/18:2)*	GPC(p-16:0/18:2)	1	10	-2.52779
0.0471783	frailty	3-aminoisobutyrate	3-aminoisobutyrate	3-aminoisobutyrate	1	10	2.52656
0.0473267	Longevity_PGS000906	choline phosphate	choline phosphate	choline phosphate	1	10	2.52614
0.0454567	Heart_failure_PGS001790	ceramide (d18:1/20:0, d16:1/22:0, d20:1/18:0)*	ceramide (d18:1/20:0, d16:1/22:0, d20:1/18:0)*	ceramide (d18:1/20:0, d16:1/22:0, d20:1/18:0)*	1	10	-2.52532
0.0474222	Cardiovascular_disease_PGS002316	3-bromo-5-chloro-2,6-dihydroxybenzoic acid*	3-bromo-5-chloro-2,6-dihydroxybenzoic acid*	3-bromo-5-chloro-2,6-dihydroxybenzoic acid*	1	10	-2.52449
0.0473876	Alzheimer_disease_late_onset_PGS000053	9-hydroxystearate	9-hydroxystearate	9-hydroxystearate	1	10	-2.52446
0.0469037	Coronary_atherosclerosis_PGS002048	3-indoxyl sulfate	3-indoxyl sulfate	3-indoxyl sulfate	1	10	-2.52366
0.0453198	amyotrophic_lateral_sclerosis	gamma-glutamylglutamate	gamma-glutamylglutamate	gamma-glutamylglutamate	1	10	2.52358
0.0453429	HDL_cholesterol_PGS002781	N-acetylglutamate	n-acetylglutamate	n-acetylglutamate	1	10	-2.52317
0.047258	Coronary_vascular_disease_CVD_PGS004514	kallikrein-related peptidase 6	kallikrein-related peptidase 6	kallikrein-related peptidase 6	1	10	2.5229		KLK6	ENSG00000167755	ENST00000376851,ENST00000310157,ENST00000597379,ENST00000594641,ENST00000599881,ENST00000391808,ENST00000456750,ENST00000424910	ENSP00000366047,ENSP00000309148,ENSP00000469630,ENSP00000470482,ENSP00000471948,ENSP00000375684,ENSP00000409241,ENSP00000396012	Q92876
0.0474984	mvAge	signal-regulatory protein alpha	signal-regulatory protein alpha	signal-regulatory protein alpha	1	10	-2.5229		SIRPA	ENSG00000198053	ENST00000400068,ENST00000356025,ENST00000358771	ENSP00000382941,ENSP00000348307,ENSP00000351621	P78324
0.0474035	Alzheimer_disease_late_onset_PGS000053	X - 17653	x - 17653	x - 17653	1	10	-2.52201
0.0475093	Alzheimers_PGS002753	inosine	inosine	inosine	1	10	-2.52127
0.0470858	Type_2_diabetes_SNPs_insulin_action_PGS000850	4-guanidinobutanoate	4-guanidinobutanoate	4-guanidinobutanoate	1	10	-2.52012
0.0456661	T2D_cases_vs_HbA1c_filtered_controls_PGS000712	pregnanediol-3-glucuronide	pregnanediol-3-glucuronide	pregnanediol-3-glucuronide	1	10	2.51891
0.0456192	Timmers_healthspan	interleukin 13	interleukin 13	interleukin 13	1	10	-2.51721		IL13	ENSG00000169194	ENST00000304506	ENSP00000304915	P35225
0.0475615	Coronary_atherosclerosis_PGS002048	acetylcarnitine (C2)	acetylcarnitine (c2)	acetylcarnitine (c2)	1	10	-2.51671
0.045946	amyotrophic_lateral_sclerosis	c-mer proto-oncogene tyrosine kinase	c-mer proto-oncogene tyrosine kinase	c-mer proto-oncogene tyrosine kinase	1	10	2.51394		MERTK	ENSG00000153208	ENST00000295408,ENST00000421804	ENSP00000295408,ENSP00000389152	Q12866
0.0457685	Alzheimers_PGS002753	erythritol	erythritol	erythritol	1	10	2.51324
0.0478429	Direct_bilirubin_umol_L_PGS000681	X - 23782	x - 23782	x - 23782	1	10	2.51312
0.047351	Coronary_artery_disease_PGS004941	X - 21339	x - 21339	x - 21339	1	10	2.51093
0.0479035	Timmers_longevity	Triglyceride HDL Ratio	triglyceride hdl ratio	triglyceride hdl ratio	1	10	2.51041
0.047383	Alzheimer_disease_late_onset_PGS000053	LDL_SIZE	ldl_size	ldl_size	1	10	2.51035
0.0481	Coronary_atherosclerosis_PGS002048	pregnenetriol disulfate*	pregnenetriol disulfate*	pregnenetriol disulfate*	1	10	-2.50917
0.0481103	LDL_cholesterol_PGS003873	N-acetyl-isoputreanine	n-acetyl-isoputreanine	n-acetyl-isoputreanine	1	10	2.50902
0.047447	LDL_cholesterol_PGS003873	ALAT (SGPT)	alat (sgpt)	alat (sgpt)	1	10	-2.50879
0.0461739	LDL_cholesterol_PGS003873	thrombospondin 2	thrombospondin 2	thrombospondin 2	1	10	-2.50879		THBS2	ENSG00000186340	ENST00000366787	ENSP00000355751	P35442
0.0462249	Coronary_atherosclerosis_PGS002048	CD163 molecule	cd163 molecule	cd163 molecule	1	10	-2.50797		CD163	ENSG00000177575	ENST00000359156,ENST00000432237	ENSP00000352071,ENSP00000403885	Q86VB7
0.0482348	Timmers_healthspan	gamma-glutamylglutamate	gamma-glutamylglutamate	gamma-glutamylglutamate	1	10	-2.50574
0.0461005	mvAge	taurochenodeoxycholate	taurochenodeoxycholate	taurochenodeoxycholate	1	10	-2.50553
0.046352	Alzheimer_disease_late_onset_PGS000053	3-hydroxypyridine sulfate	3-hydroxypyridine sulfate	3-hydroxypyridine sulfate	1	10	2.50519
0.0484597	Alzheimer_disease_late_onset_PGS000053	tumor necrosis factor (ligand) superfamily, member 13b	tumor necrosis factor (ligand) superfamily, member 13b	tumor necrosis factor (ligand) superfamily, member 13b	1	10	-2.50127		TNFSF13B	ENSG00000102524	ENST00000375887,ENST00000430559,ENST00000542136	ENSP00000365048,ENSP00000389540,ENSP00000445334	Q9Y275
0.0479705	frailty	guanidinoacetate	guanidinoacetate	guanidinoacetate	1	10	2.5001
0.0484745	Type_2_diabetes_T2D_PGS004923	N-acetylglutamine	n-acetylglutamine	n-acetylglutamine	1	10	-2.49994
0.0465066	Alzheimers_PGS002753	chemokine (C motif) ligand 1	chemokine (c motif) ligand 1	chemokine (c motif) ligand 1	1	10	2.4998		XCL1	ENSG00000143184	ENST00000367818	ENSP00000356792	P47992
0.0482294	LDL_cholesterol_PGS003873	cholate	cholate	cholate	1	10	2.49917
0.0485343	T2D_cases_vs_HbA1c_filtered_controls_PGS000712	1-margaroyl-2-oleoyl-GPC (17:0/18:1)*	1-margaroyl-2-oleoyl-gpc (17:0/18:1)*	1-margaroyl-2-oleoyl-gpc (17:0/18:1)*	1	10	-2.49815
0.0485827	Alzheimer_disease_late_onset_PGS000053	N-methylproline	n-methylproline	n-methylproline	1	10	2.49815
0.0485443	amyotrophic_lateral_sclerosis	palmitoylcholine	palmitoylcholine	palmitoylcholine	1	10	-2.49798
0.048593	Timmers_healthspan	X - 13431	x - 13431	x - 13431	1	10	2.49737
0.0467433	Cardiovascular_disease_PGS002316	1-arachidonoyl-GPI (20:4)*	1-arachidonoyl-gpi (20:4)*	1-arachidonoyl-gpi (20:4)*	1	10	-2.49733
0.0485044	LDL_cholesterol_PGS003873	orotate	orotate	orotate	1	10	2.49651
0.0485254	amyotrophic_lateral_sclerosis	1-arachidoyl-2-arachidonoyl-GPC (20:0/20:4)*	1-arachidoyl-2-arachidonoyl-gpc (20:0/20:4)*	1-arachidoyl-2-arachidonoyl-gpc (20:0/20:4)*	1	10	2.49579
0.0486241	Type_2_diabetes_SNPs_insulin_action_PGS000850	sphingomyelin (d18:2/24:1, d18:1/24:2)*	sphingomyelin (d18:2/24:1, d18:1/24:2)*	sphingomyelin (d18:2/24:1, d18:1/24:2)*	1	10	-2.49486
0.048578	Longevity_PGS000906	c-mer proto-oncogene tyrosine kinase	c-mer proto-oncogene tyrosine kinase	c-mer proto-oncogene tyrosine kinase	1	10	2.49466		MERTK	ENSG00000153208	ENST00000295408,ENST00000421804	ENSP00000295408,ENSP00000389152	Q12866
0.0469034	HDL_cholesterol_PGS002781	linoleoyl-linoleoyl-glycerol (18:2/18:2) [1]*	linoleoyl-linoleoyl-glycerol (18:2/18:2) [1]*	linoleoyl-linoleoyl-glycerol (18:2/18:2) [1]*	1	10	-2.49412
0.048599	Alzheimers_PGS002753	phosphatidylethanolamine (P-18:1/20:4, P-16:0/22:5n3)*	phosphatidylethanolamine (p-18:1/20:4, p-16:0/22:5n3)*	PE(p-18:1/20:4,p-16:0/22:5n3)	1	10	2.49412
0.0486939	Coronary_atherosclerosis_PGS002048	urate	urate	urate	1	10	2.49403
0.0484473	HDL_cholesterol_PGS002781	X - 11795	x - 11795	x - 11795	1	10	-2.49402
0.0488602	Coronary_vascular_disease_CVD_PGS004514	X - 17676	x - 17676	x - 17676	1	10	2.49329
0.0487141	Timmers_healthspan	gamma-tocopherol/beta-tocopherol	gamma-tocopherol/beta-tocopherol	gamma-tocopherol/beta-tocopherol	1	10	-2.49321
0.0488077	frailty	isoleucylleucine/leucylisoleucine	isoleucylleucine/leucylisoleucine	isoleucylleucine/leucylisoleucine	1	10	-2.49277
0.0489519	Timmers_lifespan	1-oleoyl-GPI (18:1)	1-oleoyl-gpi (18:1)	1-oleoyl-gpi (18:1)	1	10	2.49084
0.0489824	Parkinson_disease_PGS000903	chymotrypsin C (caldecrin)	chymotrypsin c (caldecrin)	chymotrypsin c (caldecrin)	1	10	-2.49061		CTRC	ENSG00000162438	ENST00000375949	ENSP00000365116	Q99895
0.0486127	Timmers_longevity	X - 16944	x - 16944	x - 16944	1	10	-2.48989
0.0490129	Timmers_longevity	1-(1-enyl-stearoyl)-2-linoleoyl-GPE (P-18:0/18:2)*	1-(1-enyl-stearoyl)-2-linoleoyl-gpe (p-18:0/18:2)*	1-(1-enyl-stearoyl)-2-linoleoyl-gpe (p-18:0/18:2)*	1	10	-2.48989
0.0488732	Timmers_longevity	4-allylcatechol sulfate	4-allylcatechol sulfate	4-allylcatechol sulfate	1	10	2.48944
0.0469765	Timmers_longevity	adenosine deaminase	adenosine deaminase	adenosine deaminase	1	10	-2.48898		ADA	ENSG00000196839	ENST00000372874	ENSP00000361965	P00813
0.0485571	Coronary_artery_disease_PGS004941	X - 24588	x - 24588	x - 24588	1	10	2.48823
0.049042	Cardiovascular_disease_PGS002316	mannitol/sorbitol	mannitol/sorbitol	mannitol/sorbitol	1	10	2.48805
0.0470336	LDL_cholesterol_PGS003873	carboxypeptidase A1 (pancreatic)	carboxypeptidase a1 (pancreatic)	carboxypeptidase a1 (pancreatic)	1	10	-2.48735		CPA1	ENSG00000264509,ENSG00000091704	ENST00000579597,ENST00000011292	ENSP00000462830,ENSP00000011292	P15085
0.0490927	Direct_bilirubin_umol_L_PGS000681	CRP HIGH SENSITIVITY	crp high sensitivity	crp high sensitivity	1	10	2.48733
0.0491029	Alzheimer_disease_late_onset_PGS000053	sulfate of piperine metabolite C16H19NO3 (3)*	sulfate of piperine metabolite c16h19no3 (3)*	sulfate of piperine metabolite c16h19no3 (3)*	1	10	-2.48674
0.0469408	Coronary_atherosclerosis_PGS002048	ASAT (SGOT)	asat (sgot)	asat (sgot)	1	10	-2.48668
0.0469521	Parkinson_disease_PGS000903	GLUCOSE	glucose	glucose	1	10	-2.48657
0.0471361	Timmers_longevity	X - 23639	x - 23639	x - 23639	1	10	-2.48574
0.0486717	Timmers_longevity	trans-urocanate	trans-urocanate	trans-urocanate	1	10	2.48491
0.0474036	Timmers_healthspan	O-sulfo-L-tyrosine	o-sulfo-l-tyrosine	o-sulfo-l-tyrosine	1	10	-2.48408
0.0489013	HDL_cholesterol_PGS002781	betaine	betaine	betaine	1	10	-2.48408
0.0474489	Timmers_longevity	homostachydrine*	homostachydrine*	homostachydrine*	1	10	-2.48219
0.0474829	Heart_failure_PGS001790	HDL CHOL DIRECT	hdl chol direct	hdl chol direct	1	10	2.4815
0.0472221	T2D_cases_vs_HbA1c_filtered_controls_PGS000712	sulfate of piperine metabolite C16H19NO3 (2)*	sulfate of piperine metabolite c16h19no3 (2)*	sulfate of piperine metabolite c16h19no3 (2)*	1	10	2.48124
0.0472782	Coronary_vascular_disease_CVD_PGS004514	EPH receptor B4	eph receptor b4	eph receptor b4	1	10	-2.48004		EPHB4	ENSG00000196411	ENST00000358173	ENSP00000350896	P54760
0.0487844	Parkinson_disease_PGS000903	chemokine (C-X-C motif) ligand 11	chemokine (c-x-c motif) ligand 11	chemokine (c-x-c motif) ligand 11	1	10	-2.48004		CXCL11	ENSG00000169248	ENST00000306621,ENST00000503860	ENSP00000306884,ENSP00000425819	O14625
0.0488364	Type_2_diabetes_SNPs_insulin_action_PGS000850	eicosanedioate (C20-DC)	eicosanedioate (c20-dc)	eicosanedioate (c20-dc)	1	10	2.47994
0.0494594	LDL_cholesterol_PGS003873	3-indoleglyoxylic acid	3-indoleglyoxylic acid	3-indoleglyoxylic acid	1	10	2.47984
0.0493482	Longevity_PGS000906	stachydrine	stachydrine	stachydrine	1	10	-2.4796
0.0491065	Alzheimers_PGS002753	androstenediol (3beta,17beta) disulfate (1)	androstenediol (3beta,17beta) disulfate (1)	Androstenediol-DS(1)	1	10	2.4794
0.0489011	Heart_failure_PGS001790	3-hydroxybutyrate (BHBA)	3-hydroxybutyrate (bhba)	3-hydroxybutyrate (bhba)	1	10	2.47924
0.0489115	T2D_cases_vs_HbA1c_filtered_controls_PGS000712	cystatin B (stefin B)	cystatin b (stefin b)	cystatin b (stefin b)	1	10	-2.47923		CSTB	ENSG00000160213	ENST00000291568	ENSP00000291568	P04080
0.0489298	Cardiovascular_disease_PGS002316	matrix metallopeptidase 10 (stromelysin 2)	matrix metallopeptidase 10 (stromelysin 2)	MMP10	1	10	-2.4776		MMP10	ENSG00000166670	ENST00000279441	ENSP00000279441	P09238
0.0490256	LDL_cholesterol_PGS003873	3-methylhistidine	3-methylhistidine	3-methylhistidine	1	10	-2.4775
0.0475327	Coronary_artery_disease_PGS004941	5alpha-pregnan-3beta,20alpha-diol monosulfate (2)	5alpha-preg-3b,20a-diol MS(2)	5Œ±-Preg-MS2	1	10	2.4773
0.0476866	Timmers_healthspan	TRIGLYCERIDES	triglycerides	triglycerides	1	10	2.47694
0.0491187	Type_2_diabetes_SNPs_insulin_action_PGS000850	delta/notch-like EGF repeat containing	delta/notch-like egf repeat containing	delta/notch-like egf repeat containing	1	10	-2.47597		DNER	ENSG00000187957	ENST00000341772	ENSP00000345229	Q8NFT8
0.0496129	Alzheimer_disease_late_onset_PGS000053	1-stearyl-2-arachidonoyl-GPC (O-18:0/20:4)*	1-stearyl-2-arachidonoyl-gpc (o-18:0/20:4)*	1-stearyl-2-arachidonoyl-gpc (o-18:0/20:4)*	1	10	-2.47588
0.0491703	HDL_cholesterol_PGS002781	p-cresol glucuronide*	p-cresol glucuronide*	p-cresol glucuronide*	1	10	2.47534
0.0476568	Type_2_diabetes_T2D_PGS004923	isoursodeoxycholate	isoursodeoxycholate	isoursodeoxycholate	1	10	2.47486
0.0477131	HDL_cholesterol_PGS002781	(S)-a-amino-omega-caprolactam	(s)-a-amino-omega-caprolactam	(s)-a-amino-omega-caprolactam	1	10	2.47412
0.0478558	LDL_cholesterol_PGS003873	tricosanoyl sphingomyelin (d18:1/23:0)*	tricosanoyl sphingomyelin (d18:1/23:0)*	tricosanoyl sphingomyelin (d18:1/23:0)*	1	10	2.47258
0.0498371	mvAge	3-methylglutarylcarnitine (2)	3-methylglutarylcarnitine (2)	3-methylglutarylcarnitine (2)	1	10	-2.47207
0.0497986	Coronary_vascular_disease_CVD_PGS004514	3-indoxyl sulfate	3-indoxyl sulfate	3-indoxyl sulfate	1	10	2.47175
0.0498287	amyotrophic_lateral_sclerosis	KIT ligand	kit ligand	kit ligand	1	10	-2.47106		KITLG	ENSG00000049130	ENST00000228280,ENST00000347404	ENSP00000228280,ENSP00000054216	P21583
0.0498287	amyotrophic_lateral_sclerosis	KIT ligand	kit ligand	kit ligand	1	10	-2.47106		KITLG	ENSG00000049130	ENST00000228280,ENST00000347404	ENSP00000228280,ENSP00000054216	P21583
0.0498287	amyotrophic_lateral_sclerosis	KIT ligand	kit ligand	kit ligand	1	10	-2.47106		KITLG	ENSG00000049130	ENST00000228280,ENST00000347404	ENSP00000228280,ENSP00000054216	P21583
0.0499385	Coronary_atherosclerosis_PGS002048	1-linoleoyl-GPG (18:2)*	1-linoleoyl-gpg (18:2)*	1-linoleoyl-gpg (18:2)*	1	10	2.47049
0.0477583	Type_2_diabetes_SNPs_insulin_action_secretion_PGS000851	interleukin 16	interleukin 16	interleukin 16	1	10	-2.47038		IL16	ENSG00000172349	ENST00000394660,ENST00000302987,ENST00000394652	ENSP00000378155,ENSP00000302935,ENSP00000378147	Q14005
0.049677	Timmers_longevity	fatty acid binding protein 2, intestinal	fatty acid binding protein 2, intestinal	fatty acid binding protein 2, intestinal	1	10	-2.46794		FABP2	ENSG00000145384	ENST00000274024	ENSP00000274024	P12104
0.0480813	Timmers_longevity	cortisone	cortisone	cortisone	1	10	2.4676
0.0479466	Timmers_longevity	OMEGA_3_TOTAL	omega_3_total	omega_3_total	1	10	2.46744
0.0496015	Alzheimer_disease_late_onset_PGS000053	sulfate of piperine metabolite C16H19NO3 (2)*	sulfate of piperine metabolite c16h19no3 (2)*	sulfate of piperine metabolite c16h19no3 (2)*	1	10	-2.46682
0.0495468	Longevity_PGS000906	ethyl alpha-glucopyranoside	ethyl alpha-glucopyranoside	ethyl alpha-glucopyranoside	1	10	-2.46662
0.0495979	Type_2_diabetes_SNPs_insulin_action_PGS000850	interleukin 5 (colony-stimulating factor, eosinophil)	interleukin 5	IL5	1	10	-2.46549		IL5	ENSG00000113525	ENST00000231454	ENSP00000231454	P05113
0.0495979	Type_2_diabetes_SNPs_insulin_action_PGS000850	interleukin 5 (colony-stimulating factor, eosinophil)	interleukin 5	IL5	1	10	-2.46549		IL5	ENSG00000113525	ENST00000231454	ENSP00000231454	P05113
0.0481176	HDL_cholesterol_PGS002781	beta-hydroxyisovalerate	beta-hydroxyisovalerate	beta-hydroxyisovalerate	1	10	-2.4653
0.0497138	Type_2_diabetes_SNPs_insulin_action_PGS000850	5,6-dihydrothymine	5,6-dihydrothymine	5,6-dihydrothymine	1	10	2.46491
0.0497036	HDL_cholesterol_PGS002781	LDL_SIZE	ldl_size	ldl_size	1	10	2.46491
0.0496693	Type_2_diabetes_SNPs_insulin_action_secretion_PGS000851	N2,N2-dimethylguanosine	n2,n2-dimethylguanosine	n2,n2-dimethylguanosine	1	10	2.46447
0.0497545	Timmers_healthspan	BILIRUBIN, TOTAL	bilirubin, total	bilirubin, total	1	10	-2.46385
0.0483167	mvAge	1-dihomo-linolenoyl-GPE (20:3n3 or 6)*	1-dihomo-linolenoyl-gpe (20:3n3 or 6)*	1-dihomo-linolenoyl-gpe (20:3n3 or 6)*	1	10	-2.46385
0.0497201	Cardiovascular_disease_PGS002316	pyridoxal	pyridoxal	pyridoxal	1	10	-2.4636
0.048167	mvAge	sulfate of piperine metabolite C16H19NO3 (2)*	sulfate of piperine metabolite c16h19no3 (2)*	sulfate of piperine metabolite c16h19no3 (2)*	1	10	-2.46317
0.0497608	Coronary_vascular_disease_CVD_PGS004514	3-phosphoglycerate	3-phosphoglycerate	3-phosphoglycerate	1	10	2.46297
0.049979	Type_2_diabetes_SNPs_insulin_action_secretion_PGS000851	arabitol/xylitol	arabitol/xylitol	arabitol/xylitol	1	10	-2.46282
0.0499304	Timmers_healthspan	choline phosphate	choline phosphate	choline phosphate	1	10	2.46177
0.0482849	Parkinson_disease_PGS000903	N-acetylcarnosine	n-acetylcarnosine	n-acetylcarnosine	1	10	-2.46177
0.0499506	Type_2_diabetes_SNPs_insulin_action_PGS000850	gamma-glutamylglutamate	gamma-glutamylglutamate	gamma-glutamylglutamate	1	10	-2.46106
0.0483852	Coronary_artery_disease_PGS004941	linoleoyl-arachidonoyl-glycerol (18:2/20:4) [1]*	linoleoyl-arachidonoyl-glycerol (18:2/20:4) [1]*	linoleoyl-arachidonoyl-glycerol (18:2/20:4) [1]*	1	10	-2.459
0.0499234	T2D_cases_vs_HbA1c_filtered_controls_PGS000712	insulin-like growth factor binding protein 1	insulin-like growth factor binding protein 1	insulin-like growth factor binding protein 1	1	10	-2.45837		IGFBP1	ENSG00000146678	ENST00000275525	ENSP00000275525	P08833
0.0484187	Heart_failure_PGS001790	X - 21441	x - 21441	x - 21441	1	10	-2.45819
0.048365	Heart_failure_PGS001790	X - 14056	x - 14056	x - 14056	1	10	-2.45811
0.0486066	Timmers_longevity	matrix metallopeptidase 1 (interstitial collagenase)	interstitial collagenase	matrix metallopeptidase 1 (interstitial collagenase)	1	10	-2.45755		MMP1	ENSG00000196611	ENST00000315274	ENSP00000322788	P03956
0.0487951	Parkinson_disease_PGS000903	WEIGHT_CALC	weight_calc	weight_calc	1	10	2.45495
0.0490162	Timmers_lifespan	fatty acid binding protein 2, intestinal	fatty acid binding protein 2, intestinal	fatty acid binding protein 2, intestinal	1	10	-2.45052		FABP2	ENSG00000145384	ENST00000274024	ENSP00000274024	P12104
0.0489501	Parkinson_disease_PGS000903	gluconate	gluconate	gluconate	1	10	-2.44984
0.0489831	Alzheimer_disease_late_onset_PGS000053	chemokine (C-C motif) ligand 23	chemokine (c-c motif) ligand 23	chemokine (c-c motif) ligand 23	1	10	2.44889		CCL23	ENSG00000167236	ENST00000591423,ENST00000293280	ENSP00000465954,ENSP00000293280	P55773
0.0488579	Type_2_diabetes_SNPs_insulin_action_secretion_PGS000851	pyridoxate	pyridoxate	pyridoxate	1	10	2.44683
0.0491921	HDL_cholesterol_PGS002781	WEIGHT_CALC	weight_calc	weight_calc	1	10	-2.44596
0.0492251	LDL_cholesterol_PGS003873	matrix metallopeptidase 10 (stromelysin 2)	matrix metallopeptidase 10 (stromelysin 2)	MMP10	1	10	-2.44562		MMP10	ENSG00000166670	ENST00000279441	ENSP00000279441	P09238
0.0491914	Type_2_diabetes_SNPs_insulin_action_PGS000850	tumor necrosis factor receptor superfamily, member 10c, decoy without an intracellular domain	tnf receptor superfamily, member 10c, decoy	TNFRSF10C	1	10	-2.4448		TNFRSF10C	ENSG00000173535	ENST00000356864	ENSP00000349324	O14798
0.0493242	Coronary_vascular_disease_CVD_PGS004514	linoleoyl-arachidonoyl-glycerol (18:2/20:4) [1]*	linoleoyl-arachidonoyl-glycerol (18:2/20:4) [1]*	linoleoyl-arachidonoyl-glycerol (18:2/20:4) [1]*	1	10	2.44277
0.0491087	LDL_cholesterol_PGS003873	N-palmitoyl-sphinganine (d18:0/16:0)	n-palmitoyl-sphinganine (d18:0/16:0)	n-palmitoyl-sphinganine (d18:0/16:0)	1	10	2.44193
0.0493462	HDL_cholesterol_PGS002781	mannose	mannose	mannose	1	10	2.44193
0.0494672	Longevity_PGS000906	EPA	epa	epa	1	10	2.4395
0.0494891	HDL_cholesterol_PGS002781	transforming growth factor, beta 1	transforming growth factor, beta 1	transforming growth factor, beta 1	1	10	-2.43868		TGFB1	ENSG00000105329	ENST00000221930	ENSP00000221930	P01137
0.0492825	Parkinson_disease_PGS000903	matrix metallopeptidase 1 (interstitial collagenase)	interstitial collagenase	matrix metallopeptidase 1 (interstitial collagenase)	1	10	-2.43868		MMP1	ENSG00000196611	ENST00000315274	ENSP00000322788	P03956
0.0495769	Cardiovascular_disease_PGS002316	CARBON DIOXIDE (CO2)	carbon dioxide (co2)	carbon dioxide (co2)	1	10	2.4375
0.0495879	HDL_cholesterol_PGS002781	oleoyl-linoleoyl-glycerol (18:1/18:2) [1]	oleoyl-linoleoyl-glycerol (18:1/18:2) [1]	OLG(18:1/18:2)_1	1	10	-2.43741
0.0496534	Timmers_longevity	5-methylthioadenosine (MTA)	5-methylthioadenosine (mta)	5-methylthioadenosine (mta)	1	10	2.43695
0.0495195	Timmers_longevity	CARBON DIOXIDE (CO2)	carbon dioxide (co2)	carbon dioxide (co2)	1	10	2.43629
0.0498282	Coronary_artery_disease_PGS004941	proprotein convertase subtilisin/kexin type 9	proprotein convertase subtilisin/kexin type 9	PCSK9	1	10	2.43296		PCSK9	ENSG00000169174	ENST00000302118	ENSP00000303208	Q8NBP7
0.049932	Parkinson_disease_PGS000903	MEAN_ARTERIAL_BLOOD_PRESSURE	mean_arterial_blood_pressure	mean_arterial_blood_pressure	1	10	2.43123
0.0499154	Timmers_lifespan	selectin E	selectin e	selectin e	1	10	2.4302		SELE	ENSG00000007908	ENST00000333360	ENSP00000331736	P16581

## Sheet: Supplementary Table 2
Age-residualized OLS results
omics_feature	prs_feature	age_group	omics_dataset	r_sq	adj_r_sq	p_val	beta	std_err	effect_direction	FDR_q
A/G RATIO	Direct_bilirubin_umol_L_PGS000681	Under 45	chemistries	0.0781181	-0.0171177	0.156782	-1.32011e+06	931327	negative	0.906071
ALAT (SGPT)	Direct_bilirubin_umol_L_PGS000681	Under 45	chemistries	0.139032	0.0500894	0.56545	-2.90845e+07	5.05793e+07	negative	0.975827
ALBUMIN	Direct_bilirubin_umol_L_PGS000681	Under 45	chemistries	0.12215	0.0314633	0.0174309	-2.14949e+06	902028	negative	0.712373
ALKALINE PHOSPHATASE	Direct_bilirubin_umol_L_PGS000681	Under 45	chemistries	0.0802614	-0.0147529	0.727403	-2.25959e+07	6.47973e+07	negative	0.986719
ARACHIDONIC ACID	Direct_bilirubin_umol_L_PGS000681	Under 45	chemistries	0.0866999	-0.00790997	0.944389	447554	6.41393e+06	positive	0.998816
ASAT (SGOT)	Direct_bilirubin_umol_L_PGS000681	Under 45	chemistries	0.123612	0.0330763	0.12748	-4.40684e+07	2.8881e+07	negative	0.89206
BILIRUBIN, TOTAL	Direct_bilirubin_umol_L_PGS000681	Under 45	chemistries	0.348721	0.28144	6.53059e-54	1.46568e+07	870877	positive	2.83836e-49
BUN/CREAT RATIO	Direct_bilirubin_umol_L_PGS000681	Under 45	chemistries	0.0887403	-0.00539808	0.829699	-2.88773e+06	1.3421e+07	negative	0.993464
CALCIUM	Direct_bilirubin_umol_L_PGS000681	Under 45	chemistries	0.141959	0.0533178	0.00380955	-3.06993e+06	1.05754e+06	negative	0.522672
CARBON DIOXIDE (CO2)	Direct_bilirubin_umol_L_PGS000681	Under 45	chemistries	0.0850937	-0.00942139	0.614238	-3.58293e+06	7.10545e+06	negative	0.979556
CHLORIDE	Direct_bilirubin_umol_L_PGS000681	Under 45	chemistries	0.107564	0.0153705	0.125129	1.07821e+07	7.02246e+06	positive	0.88999
CHOLESTEROL, TOTAL	Direct_bilirubin_umol_L_PGS000681	Under 45	chemistries	0.2191	0.138428	0.605596	6.13706e+07	1.18798e+08	positive	0.978786
CREATININE ENZ, SER	Direct_bilirubin_umol_L_PGS000681	Under 45	chemistries	0.101233	0.00838495	0.902465	49990	407779	positive	0.996537
CRP HIGH SENSITIVITY	Direct_bilirubin_umol_L_PGS000681	Under 45	chemistries	0.102911	0.0102361	0.413508	9.42785e+06	1.15226e+07	positive	0.960722
DHA	Direct_bilirubin_umol_L_PGS000681	Under 45	chemistries	0.108702	0.0163709	0.744697	-854129	2.62193e+06	negative	0.98804
DPA	Direct_bilirubin_umol_L_PGS000681	Under 45	chemistries	0.133499	0.0413185	0.900905	92805.2	745043	positive	0.996535
EPA	Direct_bilirubin_umol_L_PGS000681	Under 45	chemistries	0.0960713	0.00243229	0.419404	-1.07142e+06	1.32616e+06	negative	0.961506
FERRITIN	Direct_bilirubin_umol_L_PGS000681	Under 45	chemistries	0.115846	0.024508	0.786593	-1.00679e+08	3.71734e+08	negative	0.991975
GGT	Direct_bilirubin_umol_L_PGS000681	Under 45	chemistries	0.125708	0.0339994	0.83542	1.4242e+07	6.85266e+07	positive	0.993806
GLOBULIN	Direct_bilirubin_umol_L_PGS000681	Under 45	chemistries	0.0844268	-0.0101572	0.543029	663442	1.09024e+06	positive	0.974294
GLUCOSE	Direct_bilirubin_umol_L_PGS000681	Under 45	chemistries	0.110694	0.0188241	0.261878	-5.35521e+07	4.76936e+07	negative	0.936675
GLYCOHEMOGLOBIN A1C	Direct_bilirubin_umol_L_PGS000681	Under 45	chemistries	0.104604	0.012104	0.117606	-2.28449e+06	1.4581e+06	negative	0.886874
HDL CHOL DIRECT	Direct_bilirubin_umol_L_PGS000681	Under 45	chemistries	0.236662	0.157805	0.0890233	-8.52853e+07	5.00837e+07	negative	0.864887
HDL PARTICLE NUMBER	Direct_bilirubin_umol_L_PGS000681	Under 45	chemistries	0.145278	0.0543506	0.0567769	-3.74153e+07	1.96081e+07	negative	0.829807
HOMA-IR	Direct_bilirubin_umol_L_PGS000681	Under 45	chemistries	0.129013	0.0390346	0.595807	4.55902e+06	8.591e+06	positive	0.977853
HOMOCYSTEINE, SERUM	Direct_bilirubin_umol_L_PGS000681	Under 45	chemistries	0.0965608	0.00323033	0.446531	7.06905e+06	9.28153e+06	positive	0.964966
INSULIN	Direct_bilirubin_umol_L_PGS000681	Under 45	chemistries	0.144348	0.0559541	0.266726	2.98563e+07	2.68616e+07	positive	0.93817
LDL PARTICLE NUMBER	Direct_bilirubin_umol_L_PGS000681	Under 45	chemistries	0.238644	0.159992	0.0491444	2.69201e+09	1.36606e+09	positive	0.819388
LDL SMALL	Direct_bilirubin_umol_L_PGS000681	Under 45	chemistries	0.168313	0.0823952	0.121052	1.51869e+09	9.78415e+08	positive	0.888119
LDL-CHOL CALCULATION	Direct_bilirubin_umol_L_PGS000681	Under 45	chemistries	0.243286	0.164897	0.240865	1.26155e+08	1.07477e+08	positive	0.932788
LDL_SIZE	Direct_bilirubin_umol_L_PGS000681	Under 45	chemistries	0.145141	0.0538097	0.355514	-1.61166e+06	1.74318e+06	negative	0.953436
LINOLEIC_ACID	Direct_bilirubin_umol_L_PGS000681	Under 45	chemistries	0.0935093	-0.00292593	0.756712	-2.73199e+06	8.8151e+06	negative	0.988778
LPIR_SCORE	Direct_bilirubin_umol_L_PGS000681	Under 45	chemistries	0.128453	0.035735	0.0802199	1.05861e+08	6.04253e+07	positive	0.855664
OMEGA-3 INDEX	Direct_bilirubin_umol_L_PGS000681	Under 45	chemistries	0.105021	0.0123096	0.61448	-2.04263e+06	4.0536e+06	negative	0.979621
OMEGA-6/OMEGA-3 RATIO	Direct_bilirubin_umol_L_PGS000681	Under 45	chemistries	0.119808	0.0286283	0.90372	1.03441e+06	8.54839e+06	positive	0.99658
OMEGA_3_TOTAL	Direct_bilirubin_umol_L_PGS000681	Under 45	chemistries	0.129134	0.0364892	0.627759	1.99035e+06	4.10302e+06	positive	0.979968
OMEGA_6_TOTAL	Direct_bilirubin_umol_L_PGS000681	Under 45	chemistries	0.0955168	-0.000704779	0.676283	-4.2677e+06	1.02168e+07	negative	0.983631
POTASSIUM	Direct_bilirubin_umol_L_PGS000681	Under 45	chemistries	0.116386	0.0251031	0.635447	488069	1.02908e+06	positive	0.98044
PROTEIN, TOTAL SERUM	Direct_bilirubin_umol_L_PGS000681	Under 45	chemistries	0.115945	0.0246172	0.261093	-1.48311e+06	1.31869e+06	negative	0.936664
SODIUM	Direct_bilirubin_umol_L_PGS000681	Under 45	chemistries	0.103402	0.0107785	0.774114	1.83142e+06	6.37894e+06	positive	0.990516
TRIGLYCERIDES	Direct_bilirubin_umol_L_PGS000681	Under 45	chemistries	0.143908	0.0554689	0.228876	2.26776e+08	1.88309e+08	positive	0.930414
Triglyceride HDL Ratio	Direct_bilirubin_umol_L_PGS000681	Under 45	chemistries	0.158706	0.071796	0.243164	7.16957e+06	6.13798e+06	positive	0.932788
UREA NITROGEN	Direct_bilirubin_umol_L_PGS000681	Under 45	chemistries	0.0916898	-0.00214385	0.823224	-2.4249e+06	1.08506e+07	negative	0.993157
URIC ACID	Direct_bilirubin_umol_L_PGS000681	Under 45	chemistries	0.137512	0.048412	0.494997	2.48945e+06	3.64633e+06	positive	0.969424
VITAMIN D, 25-OH TOT	Direct_bilirubin_umol_L_PGS000681	Under 45	chemistries	0.0837623	-0.0108904	0.887542	-6.2747e+06	4.43553e+07	negative	0.99612
WEIGHT_CALC	Direct_bilirubin_umol_L_PGS000681	Under 45	chemistries	0.21615	0.134726	0.135981	1.91382e+08	1.28221e+08	positive	0.898149
BMI_CALC	Direct_bilirubin_umol_L_PGS000681	Under 45	chemistries	0.203205	0.120435	0.250195	2.19247e+07	1.90517e+07	positive	0.934844
MEAN_ARTERIAL_BLOOD_PRESSURE	Direct_bilirubin_umol_L_PGS000681	Under 45	chemistries	0.145633	0.0570054	0.792167	8.81187e+06	3.34296e+07	positive	0.992394
PULSE_PRESSURE	Direct_bilirubin_umol_L_PGS000681	Under 45	chemistries	0.0965953	0.00288112	0.963021	1.52799e+06	3.2946e+07	positive	0.999134
diastolic	Direct_bilirubin_umol_L_PGS000681	Under 45	chemistries	0.137859	0.0486717	0.975136	1.0452e+06	3.35237e+07	positive	0.99954
systolic	Direct_bilirubin_umol_L_PGS000681	Under 45	chemistries	0.133058	0.0433738	0.982599	994939	4.56014e+07	positive	0.999574
A/G RATIO	Direct_bilirubin_umol_L_PGS000681	Over 45	chemistries	0.0780178	0.0170401	0.667517	-308761	718600	negative	0.982945
ALAT (SGPT)	Direct_bilirubin_umol_L_PGS000681	Over 45	chemistries	0.0878744	0.0275486	0.508951	2.10081e+07	3.17976e+07	positive	0.971248
ALBUMIN	Direct_bilirubin_umol_L_PGS000681	Over 45	chemistries	0.0962482	0.0364763	0.0291924	-1.49314e+06	683781	negative	0.765321
ALKALINE PHOSPHATASE	Direct_bilirubin_umol_L_PGS000681	Over 45	chemistries	0.0820183	0.0213052	0.966758	-2.15887e+06	5.17921e+07	negative	0.999336
ARACHIDONIC ACID	Direct_bilirubin_umol_L_PGS000681	Over 45	chemistries	0.0595371	-0.00277274	0.402352	-4.39463e+06	5.2458e+06	negative	0.959937
ASAT (SGOT)	Direct_bilirubin_umol_L_PGS000681	Over 45	chemistries	0.0662169	0.0044588	0.651257	8.25458e+06	1.82568e+07	positive	0.981559
BILIRUBIN, TOTAL	Direct_bilirubin_umol_L_PGS000681	Over 45	chemistries	0.358256	0.315813	8.93186e-95	1.35903e+07	597013	positive	1.1646e-89
BUN/CREAT RATIO	Direct_bilirubin_umol_L_PGS000681	Over 45	chemistries	0.0790248	0.0181138	0.88098	-1.73622e+06	1.15933e+07	negative	0.995888
CALCIUM	Direct_bilirubin_umol_L_PGS000681	Over 45	chemistries	0.0810245	0.0202457	0.0454072	-1.83414e+06	915664	negative	0.813536
CARBON DIOXIDE (CO2)	Direct_bilirubin_umol_L_PGS000681	Over 45	chemistries	0.0569183	-0.00545478	0.74305	-1.8745e+06	5.71672e+06	negative	0.987814
CHLORIDE	Direct_bilirubin_umol_L_PGS000681	Over 45	chemistries	0.0506684	-0.0121181	0.124882	-9.8774e+06	6.4317e+06	negative	0.889588
CHOLESTEROL, TOTAL	Direct_bilirubin_umol_L_PGS000681	Over 45	chemistries	0.16955	0.114626	0.342199	-8.7901e+07	9.25051e+07	negative	0.951538
CREATININE ENZ, SER	Direct_bilirubin_umol_L_PGS000681	Over 45	chemistries	0.0837103	0.0231091	0.536436	224105	362395	positive	0.973472
CRP HIGH SENSITIVITY	Direct_bilirubin_umol_L_PGS000681	Over 45	chemistries	0.0610761	-0.00102209	0.0222062	2.56269e+07	1.1191e+07	positive	0.734316
DHA	Direct_bilirubin_umol_L_PGS000681	Over 45	chemistries	0.064774	0.00281112	0.248894	2.48917e+06	2.15768e+06	positive	0.934541
DPA	Direct_bilirubin_umol_L_PGS000681	Over 45	chemistries	0.0779615	0.0154927	0.148853	888198	614840	positive	0.902808
EPA	Direct_bilirubin_umol_L_PGS000681	Over 45	chemistries	0.0579657	-0.0044482	0.527129	830822	1.31336e+06	positive	0.972417
FERRITIN	Direct_bilirubin_umol_L_PGS000681	Over 45	chemistries	0.0709255	0.00947877	0.66686	-1.25074e+08	2.90483e+08	negative	0.982945
GGT	Direct_bilirubin_umol_L_PGS000681	Over 45	chemistries	0.0681815	0.00578297	0.0636489	-1.18947e+08	6.40716e+07	negative	0.838778
GLOBULIN	Direct_bilirubin_umol_L_PGS000681	Over 45	chemistries	0.0744806	0.013269	0.671959	-355713	839796	negative	0.983341
GLUCOSE	Direct_bilirubin_umol_L_PGS000681	Over 45	chemistries	0.100022	0.0404996	0.600798	2.06276e+07	3.94108e+07	positive	0.978185
GLYCOHEMOGLOBIN A1C	Direct_bilirubin_umol_L_PGS000681	Over 45	chemistries	0.123691	0.0657343	0.712634	-434273	1.17877e+06	negative	0.985749
HDL CHOL DIRECT	Direct_bilirubin_umol_L_PGS000681	Over 45	chemistries	0.188863	0.135216	0.537405	2.77717e+07	4.5016e+07	positive	0.97358
HDL PARTICLE NUMBER	Direct_bilirubin_umol_L_PGS000681	Over 45	chemistries	0.0998335	0.0388467	0.967791	621865	1.53972e+07	positive	0.999336
HOMA-IR	Direct_bilirubin_umol_L_PGS000681	Over 45	chemistries	0.0773473	0.0163253	0.501916	-5.07049e+06	7.54882e+06	negative	0.970054
HOMOCYSTEINE, SERUM	Direct_bilirubin_umol_L_PGS000681	Over 45	chemistries	0.0824325	0.0217468	0.344041	-7.01284e+06	7.4084e+06	negative	0.951538
INSULIN	Direct_bilirubin_umol_L_PGS000681	Over 45	chemistries	0.079443	0.0185596	0.20766	-2.66313e+07	2.11235e+07	negative	0.924105
LDL PARTICLE NUMBER	Direct_bilirubin_umol_L_PGS000681	Over 45	chemistries	0.158938	0.103312	0.0566123	-2.0343e+09	1.06606e+09	negative	0.829618
LDL SMALL	Direct_bilirubin_umol_L_PGS000681	Over 45	chemistries	0.125969	0.068163	0.00625631	-2.0863e+09	7.61658e+08	negative	0.583315
LDL-CHOL CALCULATION	Direct_bilirubin_umol_L_PGS000681	Over 45	chemistries	0.183549	0.129551	0.530673	-5.10712e+07	8.1431e+07	negative	0.972649
LDL_SIZE	Direct_bilirubin_umol_L_PGS000681	Over 45	chemistries	0.103039	0.0422141	0.209409	1.6448e+06	1.30964e+06	positive	0.924459
LINOLEIC_ACID	Direct_bilirubin_umol_L_PGS000681	Over 45	chemistries	0.099631	0.0386304	0.0566621	1.37436e+07	7.20353e+06	positive	0.829673
LPIR_SCORE	Direct_bilirubin_umol_L_PGS000681	Over 45	chemistries	0.117231	0.0574226	0.0973503	-7.50021e+07	4.52026e+07	negative	0.871891
OMEGA-3 INDEX	Direct_bilirubin_umol_L_PGS000681	Over 45	chemistries	0.0615236	-0.000654555	0.37476	3.11955e+06	3.51323e+06	positive	0.956609
OMEGA-6/OMEGA-3 RATIO	Direct_bilirubin_umol_L_PGS000681	Over 45	chemistries	0.0670512	0.00523925	0.360245	-5.9994e+06	6.55478e+06	negative	0.953909
OMEGA_3_TOTAL	Direct_bilirubin_umol_L_PGS000681	Over 45	chemistries	0.0538569	-0.0102449	0.387858	3.23542e+06	3.74535e+06	positive	0.958542
OMEGA_6_TOTAL	Direct_bilirubin_umol_L_PGS000681	Over 45	chemistries	0.114376	0.054374	0.0522116	1.59878e+07	8.22638e+06	positive	0.824021
POTASSIUM	Direct_bilirubin_umol_L_PGS000681	Over 45	chemistries	0.0495269	-0.0133351	0.509829	-584845	887053	negative	0.971248
PROTEIN, TOTAL SERUM	Direct_bilirubin_umol_L_PGS000681	Over 45	chemistries	0.0782368	0.0172736	0.0836185	-1.83672e+06	1.06072e+06	negative	0.858716
SODIUM	Direct_bilirubin_umol_L_PGS000681	Over 45	chemistries	0.0496737	-0.0131785	0.326876	-6.0257e+06	6.14334e+06	negative	0.948819
TRIGLYCERIDES	Direct_bilirubin_umol_L_PGS000681	Over 45	chemistries	0.122445	0.0644054	0.00887156	-3.92119e+08	1.49578e+08	negative	0.636051
Triglyceride HDL Ratio	Direct_bilirubin_umol_L_PGS000681	Over 45	chemistries	0.136557	0.0794508	0.0259304	-9.63426e+06	4.31994e+06	negative	0.75466
UREA NITROGEN	Direct_bilirubin_umol_L_PGS000681	Over 45	chemistries	0.0866078	0.0261983	0.791616	2.5366e+06	9.59836e+06	positive	0.992365
URIC ACID	Direct_bilirubin_umol_L_PGS000681	Over 45	chemistries	0.0792668	0.0183717	0.236756	-3.57515e+06	3.02016e+06	negative	0.932219
VITAMIN D, 25-OH TOT	Direct_bilirubin_umol_L_PGS000681	Over 45	chemistries	0.0830162	0.0223692	0.0011656	1.16751e+08	3.58633e+07	positive	0.365045
WEIGHT_CALC	Direct_bilirubin_umol_L_PGS000681	Over 45	chemistries	0.162889	0.107524	0.641764	4.36619e+07	9.38243e+07	positive	0.980689
BMI_CALC	Direct_bilirubin_umol_L_PGS000681	Over 45	chemistries	0.159454	0.103862	0.902816	-1.73141e+06	1.41766e+07	negative	0.996579
MEAN_ARTERIAL_BLOOD_PRESSURE	Direct_bilirubin_umol_L_PGS000681	Over 45	chemistries	0.0859044	0.0250729	0.796262	7.56778e+06	2.93042e+07	positive	0.992756
PULSE_PRESSURE	Direct_bilirubin_umol_L_PGS000681	Over 45	chemistries	0.0809004	0.0197358	0.599261	-1.54247e+07	2.93461e+07	negative	0.977949
diastolic	Direct_bilirubin_umol_L_PGS000681	Over 45	chemistries	0.0794692	0.0185876	0.977423	783768	2.76895e+07	positive	0.999574
systolic	Direct_bilirubin_umol_L_PGS000681	Over 45	chemistries	0.0826873	0.0220185	0.908824	-4.85258e+06	4.23629e+07	negative	0.996781
A/G RATIO	Direct_bilirubin_umol_L_PGS000681	All	chemistries	0.0455659	0.00859141	0.272058	-614489	559313	negative	0.939143
ALAT (SGPT)	Direct_bilirubin_umol_L_PGS000681	All	chemistries	0.0701797	0.0341588	0.88639	3.90151e+06	2.73038e+07	positive	0.996063
ALBUMIN	Direct_bilirubin_umol_L_PGS000681	All	chemistries	0.0628857	0.0265822	0.00221009	-1.65359e+06	539587	negative	0.44758
ALKALINE PHOSPHATASE	Direct_bilirubin_umol_L_PGS000681	All	chemistries	0.0440574	0.00702446	0.817192	-9.21294e+06	3.98502e+07	negative	0.993085
ARACHIDONIC ACID	Direct_bilirubin_umol_L_PGS000681	All	chemistries	0.0412321	0.00401289	0.532028	-2.48996e+06	3.98377e+06	negative	0.972916
ASAT (SGOT)	Direct_bilirubin_umol_L_PGS000681	All	chemistries	0.0465796	0.00964446	0.61153	-7.95943e+06	1.5669e+07	negative	0.979318
BILIRUBIN, TOTAL	Direct_bilirubin_umol_L_PGS000681	All	chemistries	0.324354	0.29818	6.51895e-150	1.4019e+07	491054	positive	1.69998e-144
BUN/CREAT RATIO	Direct_bilirubin_umol_L_PGS000681	All	chemistries	0.0503737	0.0135855	0.885802	-1.24341e+06	8.65662e+06	negative	0.996038
CALCIUM	Direct_bilirubin_umol_L_PGS000681	All	chemistries	0.0583701	0.0218917	0.000701918	-2.33536e+06	688023	negative	0.289616
CARBON DIOXIDE (CO2)	Direct_bilirubin_umol_L_PGS000681	All	chemistries	0.0398269	0.00263015	0.420716	-3.51722e+06	4.36732e+06	negative	0.961617
CHLORIDE	Direct_bilirubin_umol_L_PGS000681	All	chemistries	0.036866	-0.000445444	0.714816	-1.72006e+06	4.70668e+06	negative	0.98583
CHOLESTEROL, TOTAL	Direct_bilirubin_umol_L_PGS000681	All	chemistries	0.160243	0.127711	0.502098	-4.82056e+07	7.18074e+07	negative	0.970101
CREATININE ENZ, SER	Direct_bilirubin_umol_L_PGS000681	All	chemistries	0.0488808	0.0120348	0.679523	111161	269040	positive	0.984002
CRP HIGH SENSITIVITY	Direct_bilirubin_umol_L_PGS000681	All	chemistries	0.0415156	0.00438419	0.0175167	1.9139e+07	8.04929e+06	positive	0.712373
DHA	Direct_bilirubin_umol_L_PGS000681	All	chemistries	0.0435393	0.00640966	0.522983	1.05014e+06	1.64375e+06	positive	0.971726
DPA	Direct_bilirubin_umol_L_PGS000681	All	chemistries	0.0606833	0.0233694	0.15096	671763	467563	positive	0.903759
EPA	Direct_bilirubin_umol_L_PGS000681	All	chemistries	0.0363138	-0.00109635	0.746508	303574	939004	positive	0.988226
FERRITIN	Direct_bilirubin_umol_L_PGS000681	All	chemistries	0.0454773	0.0084994	0.473402	-1.62363e+08	2.26417e+08	negative	0.967099
GGT	Direct_bilirubin_umol_L_PGS000681	All	chemistries	0.0457941	0.00834493	0.121605	-7.24534e+07	4.67815e+07	negative	0.888448
GLOBULIN	Direct_bilirubin_umol_L_PGS000681	All	chemistries	0.0419411	0.00482617	0.959544	-33247.2	655337	negative	0.999034
GLUCOSE	Direct_bilirubin_umol_L_PGS000681	All	chemistries	0.0672179	0.0310822	0.623802	-1.4695e+07	2.99564e+07	negative	0.97996
GLYCOHEMOGLOBIN A1C	Direct_bilirubin_umol_L_PGS000681	All	chemistries	0.0810531	0.0454534	0.115667	-1.42183e+06	903360	negative	0.88545
HDL CHOL DIRECT	Direct_bilirubin_umol_L_PGS000681	All	chemistries	0.174316	0.142329	0.641462	-1.54682e+07	3.3213e+07	negative	0.98063
HDL PARTICLE NUMBER	Direct_bilirubin_umol_L_PGS000681	All	chemistries	0.0781864	0.0415677	0.234457	-1.42118e+07	1.19493e+07	negative	0.931842
HOMA-IR	Direct_bilirubin_umol_L_PGS000681	All	chemistries	0.0605908	0.0241984	0.686125	-2.26737e+06	5.60981e+06	negative	0.984193
HOMOCYSTEINE, SERUM	Direct_bilirubin_umol_L_PGS000681	All	chemistries	0.0489253	0.012081	0.620754	-2.82518e+06	5.70902e+06	negative	0.97996
INSULIN	Direct_bilirubin_umol_L_PGS000681	All	chemistries	0.0671211	0.0309817	0.685547	-6.63267e+06	1.63783e+07	negative	0.984156
LDL PARTICLE NUMBER	Direct_bilirubin_umol_L_PGS000681	All	chemistries	0.154321	0.12156	0.574076	-4.66764e+08	8.30315e+08	negative	0.976299
LDL SMALL	Direct_bilirubin_umol_L_PGS000681	All	chemistries	0.100186	0.0653279	0.113727	-9.41141e+08	5.94765e+08	negative	0.884726
LDL-CHOL CALCULATION	Direct_bilirubin_umol_L_PGS000681	All	chemistries	0.174778	0.142776	0.993398	-530084	6.40505e+07	negative	0.999795
LDL_SIZE	Direct_bilirubin_umol_L_PGS000681	All	chemistries	0.0828135	0.0463013	0.599429	542624	1.03296e+06	positive	0.977949
LINOLEIC_ACID	Direct_bilirubin_umol_L_PGS000681	All	chemistries	0.0649409	0.0277961	0.161083	7.68655e+06	5.48261e+06	positive	0.906999
LPIR_SCORE	Direct_bilirubin_umol_L_PGS000681	All	chemistries	0.0951383	0.0591931	0.655208	-1.58524e+07	3.54949e+07	negative	0.98169
OMEGA-3 INDEX	Direct_bilirubin_umol_L_PGS000681	All	chemistries	0.0430697	0.00592179	0.668777	1.12185e+06	2.62179e+06	positive	0.982946
OMEGA-6/OMEGA-3 RATIO	Direct_bilirubin_umol_L_PGS000681	All	chemistries	0.0458395	0.00879911	0.523584	-3.28157e+06	5.14397e+06	negative	0.971726
OMEGA_3_TOTAL	Direct_bilirubin_umol_L_PGS000681	All	chemistries	0.0428868	0.00486586	0.277332	2.98813e+06	2.74986e+06	positive	0.940189
OMEGA_6_TOTAL	Direct_bilirubin_umol_L_PGS000681	All	chemistries	0.0737749	0.036981	0.193367	8.19508e+06	6.29835e+06	positive	0.918428
POTASSIUM	Direct_bilirubin_umol_L_PGS000681	All	chemistries	0.0396123	0.00240716	0.860782	-116272	662890	negative	0.995168
PROTEIN, TOTAL SERUM	Direct_bilirubin_umol_L_PGS000681	All	chemistries	0.0483389	0.0114718	0.0404593	-1.67618e+06	817490	negative	0.795852
SODIUM	Direct_bilirubin_umol_L_PGS000681	All	chemistries	0.0329729	-0.00448945	0.498914	-2.99476e+06	4.42798e+06	negative	0.969873
TRIGLYCERIDES	Direct_bilirubin_umol_L_PGS000681	All	chemistries	0.0986912	0.0637748	0.152269	-1.64951e+08	1.15179e+08	negative	0.90429
Triglyceride HDL Ratio	Direct_bilirubin_umol_L_PGS000681	All	chemistries	0.111806	0.0773981	0.298861	-3.63977e+06	3.50261e+06	negative	0.943811
UREA NITROGEN	Direct_bilirubin_umol_L_PGS000681	All	chemistries	0.0519295	0.0152015	0.904483	855117	7.12506e+06	positive	0.99658
URIC ACID	Direct_bilirubin_umol_L_PGS000681	All	chemistries	0.064291	0.0280419	0.652939	-1.03199e+06	2.29456e+06	negative	0.981655
VITAMIN D, 25-OH TOT	Direct_bilirubin_umol_L_PGS000681	All	chemistries	0.0423364	0.00523685	0.0105864	7.04342e+07	2.7529e+07	positive	0.65662
WEIGHT_CALC	Direct_bilirubin_umol_L_PGS000681	All	chemistries	0.153717	0.120864	0.188429	9.83805e+07	7.4774e+07	positive	0.916848
BMI_CALC	Direct_bilirubin_umol_L_PGS000681	All	chemistries	0.143655	0.110411	0.595507	5.96259e+06	1.12298e+07	positive	0.977846
MEAN_ARTERIAL_BLOOD_PRESSURE	Direct_bilirubin_umol_L_PGS000681	All	chemistries	0.0792421	0.0433871	0.887334	3.08048e+06	2.17399e+07	positive	0.99612
PULSE_PRESSURE	Direct_bilirubin_umol_L_PGS000681	All	chemistries	0.0540103	0.0171727	0.585703	-1.18148e+07	2.1672e+07	negative	0.977282
diastolic	Direct_bilirubin_umol_L_PGS000681	All	chemistries	0.0727863	0.0368478	0.915789	-2.22212e+06	2.10123e+07	negative	0.996923
systolic	Direct_bilirubin_umol_L_PGS000681	All	chemistries	0.0707199	0.0347013	0.762617	-9.30601e+06	3.08056e+07	negative	0.989069
S-1-pyrroline-5-carboxylate	Direct_bilirubin_umol_L_PGS000681	Under 45	metabolomics	0.121861	-0.0238483	0.867039	-290212	1.73244e+06	negative	0.995265
spermidine	Direct_bilirubin_umol_L_PGS000681	Under 45	metabolomics	0.136754	-0.00808564	0.0878052	5.55624e+06	3.24767e+06	positive	0.862685
1-methylnicotinamide	Direct_bilirubin_umol_L_PGS000681	Under 45	metabolomics	0.105049	-0.0371571	0.29144	2.90008e+06	2.7459e+06	positive	0.942541
12,13-DiHOME	Direct_bilirubin_umol_L_PGS000681	Under 45	metabolomics	0.165868	0.0217202	0.676978	1.29301e+06	3.10168e+06	positive	0.983675
alpha-ketoglutarate	Direct_bilirubin_umol_L_PGS000681	Under 45	metabolomics	0.154638	0.0191636	0.960248	-103187	2.06917e+06	negative	0.999055
kynurenate	Direct_bilirubin_umol_L_PGS000681	Under 45	metabolomics	0.161106	0.0272398	0.380939	1.32871e+06	1.51508e+06	positive	0.957565
3-hydroxyisobutyrate	Direct_bilirubin_umol_L_PGS000681	Under 45	metabolomics	0.131582	-0.00553702	0.803881	626638	2.52202e+06	positive	0.992959
3-hydroxy-3-methylglutarate	Direct_bilirubin_umol_L_PGS000681	Under 45	metabolomics	0.176655	0.0463791	0.252224	1.54361e+06	1.34653e+06	positive	0.935136
3-phosphoglycerate	Direct_bilirubin_umol_L_PGS000681	Under 45	metabolomics	0.138618	-0.00989638	0.769447	1.3392e+06	4.56627e+06	positive	0.98987
cholate	Direct_bilirubin_umol_L_PGS000681	Under 45	metabolomics	0.148524	0.00999721	0.816432	7.47525e+06	3.21835e+07	positive	0.993085
5,6-dihydrothymine	Direct_bilirubin_umol_L_PGS000681	Under 45	metabolomics	0.120613	-0.0224547	0.717003	440997	1.21591e+06	positive	0.98621
hypoxanthine	Direct_bilirubin_umol_L_PGS000681	Under 45	metabolomics	0.105561	-0.0374725	0.682339	1.21804e+06	2.97426e+06	positive	0.984031
9,10-DiHOME	Direct_bilirubin_umol_L_PGS000681	Under 45	metabolomics	0.141171	-0.00793148	0.78074	-933294	3.3508e+06	negative	0.991369
linoleate (18:2n6)	Direct_bilirubin_umol_L_PGS000681	Under 45	metabolomics	0.103171	-0.0405521	0.506093	-1.34865e+06	2.02668e+06	negative	0.97081
laurate (12:0)	Direct_bilirubin_umol_L_PGS000681	Under 45	metabolomics	0.107664	-0.0347304	0.414232	3.15184e+06	3.85691e+06	positive	0.960722
quinolinate	Direct_bilirubin_umol_L_PGS000681	Under 45	metabolomics	0.143222	0.00383329	0.381184	2.13325e+06	2.43367e+06	positive	0.957596
N6,N6,N6-trimethyllysine	Direct_bilirubin_umol_L_PGS000681	Under 45	metabolomics	0.134718	-0.00335911	0.0793736	4.65921e+06	2.65007e+06	positive	0.855202
N-acetylputrescine	Direct_bilirubin_umol_L_PGS000681	Under 45	metabolomics	0.179405	0.0484588	0.0590937	2.39189e+06	1.26415e+06	positive	0.832696
N-formylmethionine	Direct_bilirubin_umol_L_PGS000681	Under 45	metabolomics	0.156928	0.0226811	0.214358	1.1384e+06	915590	positive	0.925663
S-adenosylhomocysteine (SAH)	Direct_bilirubin_umol_L_PGS000681	Under 45	metabolomics	0.143707	0.00317756	0.173808	1.9801e+06	1.45361e+06	positive	0.912077
adenosine 5'-monophosphate (AMP)	Direct_bilirubin_umol_L_PGS000681	Under 45	metabolomics	0.129166	-0.00891523	0.138349	5.98222e+06	4.02986e+06	positive	0.899152
5-methylthioadenosine (MTA)	Direct_bilirubin_umol_L_PGS000681	Under 45	metabolomics	0.152098	0.0165065	0.168386	1.56715e+06	1.13599e+06	positive	0.910009
arachidonate (20:4n6)	Direct_bilirubin_umol_L_PGS000681	Under 45	metabolomics	0.136574	-0.000913977	0.329451	-1.8772e+06	1.92291e+06	negative	0.948883
arginine	Direct_bilirubin_umol_L_PGS000681	Under 45	metabolomics	0.180208	0.0479833	0.548062	452446	752690	positive	0.974428
aspartate	Direct_bilirubin_umol_L_PGS000681	Under 45	metabolomics	0.149589	0.0153134	0.228231	2.16269e+06	1.79256e+06	positive	0.930097
3-(4-hydroxyphenyl)lactate	Direct_bilirubin_umol_L_PGS000681	Under 45	metabolomics	0.14244	0.00703555	0.186423	2.04034e+06	1.54204e+06	positive	0.916046
phenylpyruvate	Direct_bilirubin_umol_L_PGS000681	Under 45	metabolomics	0.144736	0.009123	0.58256	-842511	1.53176e+06	negative	0.976826
beta-alanine	Direct_bilirubin_umol_L_PGS000681	Under 45	metabolomics	0.142804	0.00688458	0.0275077	2.80694e+06	1.26949e+06	positive	0.760862
biliverdin	Direct_bilirubin_umol_L_PGS000681	Under 45	metabolomics	0.323229	0.216145	1.66339e-27	2.53251e+07	2.18573e+06	positive	2.16886e-23
succinate	Direct_bilirubin_umol_L_PGS000681	Under 45	metabolomics	0.136635	-0.00172478	0.155004	4.05714e+06	2.84836e+06	positive	0.905257
3-hydroxybutyrate (BHBA)	Direct_bilirubin_umol_L_PGS000681	Under 45	metabolomics	0.154765	0.0207427	0.163896	-1.27603e+07	9.15206e+06	negative	0.908283
cholesterol	Direct_bilirubin_umol_L_PGS000681	Under 45	metabolomics	0.173742	0.0421723	0.610369	-837690	1.64289e+06	negative	0.979137
choline phosphate	Direct_bilirubin_umol_L_PGS000681	Under 45	metabolomics	0.146929	0.0096324	0.323763	1.53853e+06	1.55753e+06	positive	0.948298
cortisone	Direct_bilirubin_umol_L_PGS000681	Under 45	metabolomics	0.188351	0.0580006	0.195461	-1.52856e+06	1.17904e+06	negative	0.918966
creatinine	Direct_bilirubin_umol_L_PGS000681	Under 45	metabolomics	0.132905	-0.00575673	0.0495058	891495	452695	positive	0.819683
cysteinylglycine	Direct_bilirubin_umol_L_PGS000681	Under 45	metabolomics	0.136199	-0.00713126	0.044976	5.30851e+06	2.64045e+06	positive	0.81168
cystine	Direct_bilirubin_umol_L_PGS000681	Under 45	metabolomics	0.158247	0.0242103	0.451359	-2.26621e+06	3.00647e+06	negative	0.965622
sphingosine	Direct_bilirubin_umol_L_PGS000681	Under 45	metabolomics	0.126338	-0.012192	0.790451	2.1961e+06	8.2599e+06	positive	0.992321
deoxycholate	Direct_bilirubin_umol_L_PGS000681	Under 45	metabolomics	0.14332	-0.00404524	0.770486	2.48505e+06	8.51276e+06	positive	0.989999
sphinganine	Direct_bilirubin_umol_L_PGS000681	Under 45	metabolomics	0.143643	0.00669942	0.409782	5.92428e+06	7.18081e+06	positive	0.960701
fumarate	Direct_bilirubin_umol_L_PGS000681	Under 45	metabolomics	0.169806	0.0367624	0.174266	1.72478e+06	1.26757e+06	positive	0.912077
gamma-glutamylglutamate	Direct_bilirubin_umol_L_PGS000681	Under 45	metabolomics	0.129534	-0.017836	0.576366	1.23267e+06	2.20467e+06	positive	0.976304
gluconate	Direct_bilirubin_umol_L_PGS000681	Under 45	metabolomics	0.164322	0.0306853	0.15488	-2.35231e+06	1.65098e+06	negative	0.905241
glutarate (C5-DC)	Direct_bilirubin_umol_L_PGS000681	Under 45	metabolomics	0.15811	0.0181063	0.308984	5.0346e+06	4.94313e+06	positive	0.94631
glycine	Direct_bilirubin_umol_L_PGS000681	Under 45	metabolomics	0.16826	0.0377568	0.787485	307471	1.13992e+06	positive	0.991975
glycocholate	Direct_bilirubin_umol_L_PGS000681	Under 45	metabolomics	0.132074	-0.00583825	0.726361	8.19163e+06	2.33927e+07	positive	0.986719
guanidinoacetate	Direct_bilirubin_umol_L_PGS000681	Under 45	metabolomics	0.126962	-0.0114689	0.466939	1.22944e+06	1.68866e+06	positive	0.966764
histidine	Direct_bilirubin_umol_L_PGS000681	Under 45	metabolomics	0.147825	0.0127026	0.287256	862951	810008	positive	0.941978
cortisol	Direct_bilirubin_umol_L_PGS000681	Under 45	metabolomics	0.139487	0.00275337	0.886361	-343373	2.40142e+06	negative	0.996063
inosine	Direct_bilirubin_umol_L_PGS000681	Under 45	metabolomics	0.127129	-0.0186731	0.3454	6.6046e+06	6.99237e+06	positive	0.951868
myo-inositol	Direct_bilirubin_umol_L_PGS000681	Under 45	metabolomics	0.16297	0.028831	0.380203	-1.25634e+06	1.43034e+06	negative	0.957336
isoleucine	Direct_bilirubin_umol_L_PGS000681	Under 45	metabolomics	0.13668	-0.000500307	0.422287	562408	700245	positive	0.961687
citrulline	Direct_bilirubin_umol_L_PGS000681	Under 45	metabolomics	0.158709	0.0247455	0.491555	531135	771577	positive	0.968798
leucine	Direct_bilirubin_umol_L_PGS000681	Under 45	metabolomics	0.161736	0.0285376	0.585899	372702	683653	positive	0.977282
lysine	Direct_bilirubin_umol_L_PGS000681	Under 45	metabolomics	0.153671	0.019191	0.216617	800837	647283	positive	0.926732
malate	Direct_bilirubin_umol_L_PGS000681	Under 45	metabolomics	0.163459	0.032202	0.236699	1.41756e+06	1.19649e+06	positive	0.932219
methionine	Direct_bilirubin_umol_L_PGS000681	Under 45	metabolomics	0.14339	0.00581892	0.00770368	1.80448e+06	674221	positive	0.612782
palmitate (16:0)	Direct_bilirubin_umol_L_PGS000681	Under 45	metabolomics	0.121454	-0.01785	0.234498	-1.78201e+06	1.49702e+06	negative	0.931842
nicotinamide	Direct_bilirubin_umol_L_PGS000681	Under 45	metabolomics	0.132784	-0.00530755	0.22119	2.71033e+06	2.21252e+06	positive	0.927938
stearate (18:0)	Direct_bilirubin_umol_L_PGS000681	Under 45	metabolomics	0.139772	0.0027928	0.48734	-854009	1.22863e+06	negative	0.968462
ornithine	Direct_bilirubin_umol_L_PGS000681	Under 45	metabolomics	0.130092	-0.0093158	0.151142	1.44462e+06	1.0047e+06	positive	0.904001
orotate	Direct_bilirubin_umol_L_PGS000681	Under 45	metabolomics	0.125885	-0.0133057	0.0997723	3.83697e+06	2.32656e+06	positive	0.874222
palmitoleate (16:1n7)	Direct_bilirubin_umol_L_PGS000681	Under 45	metabolomics	0.104423	-0.0375821	0.730914	-1.2422e+06	3.60987e+06	negative	0.986893
phenylalanine	Direct_bilirubin_umol_L_PGS000681	Under 45	metabolomics	0.148513	0.0120566	0.0913584	856085	506034	positive	0.865805
phosphate	Direct_bilirubin_umol_L_PGS000681	Under 45	metabolomics	0.142423	0.00469623	0.119411	-1.71539e+06	1.09953e+06	negative	0.887068
proline	Direct_bilirubin_umol_L_PGS000681	Under 45	metabolomics	0.17158	0.0379633	0.115363	1.55809e+06	987699	positive	0.885404
lactate	Direct_bilirubin_umol_L_PGS000681	Under 45	metabolomics	0.122031	-0.0171822	0.260436	2.27472e+06	2.0189e+06	positive	0.936529
pyridoxal	Direct_bilirubin_umol_L_PGS000681	Under 45	metabolomics	0.103724	-0.0469954	0.888188	-864040	6.14195e+06	negative	0.99612
retinol (Vitamin A)	Direct_bilirubin_umol_L_PGS000681	Under 45	metabolomics	0.125105	-0.0145058	0.570795	649801	1.14547e+06	positive	0.976035
salicylate	Direct_bilirubin_umol_L_PGS000681	Under 45	metabolomics	0.158222	0.0203766	0.781887	1.33717e+08	4.82691e+08	positive	0.9914
serine	Direct_bilirubin_umol_L_PGS000681	Under 45	metabolomics	0.131238	-0.00739406	0.780891	231450	831605	positive	0.991369
serotonin	Direct_bilirubin_umol_L_PGS000681	Under 45	metabolomics	0.133255	-0.00806174	0.122097	6.80803e+06	4.39544e+06	positive	0.8887
taurine	Direct_bilirubin_umol_L_PGS000681	Under 45	metabolomics	0.13204	-0.00646391	0.230712	1.56986e+06	1.30813e+06	positive	0.931172
myristate (14:0)	Direct_bilirubin_umol_L_PGS000681	Under 45	metabolomics	0.111827	-0.0290037	0.556756	-1.44609e+06	2.45898e+06	negative	0.975102
urea	Direct_bilirubin_umol_L_PGS000681	Under 45	metabolomics	0.115785	-0.0247154	0.851739	216115	1.15568e+06	positive	0.994696
uridine	Direct_bilirubin_umol_L_PGS000681	Under 45	metabolomics	0.159997	0.0262387	0.528243	543951	861829	positive	0.972417
trans-urocanate	Direct_bilirubin_umol_L_PGS000681	Under 45	metabolomics	0.127492	-0.0120344	0.297735	3.01543e+06	2.89261e+06	positive	0.943791
glutamate	Direct_bilirubin_umol_L_PGS000681	Under 45	metabolomics	0.179161	0.0487307	0.211544	2.6583e+06	2.1249e+06	positive	0.925358
glutamine	Direct_bilirubin_umol_L_PGS000681	Under 45	metabolomics	0.17762	0.0461094	0.62747	253330	521672	positive	0.97996
threonine	Direct_bilirubin_umol_L_PGS000681	Under 45	metabolomics	0.11767	-0.0225302	0.127523	1.78251e+06	1.16761e+06	positive	0.89221
tryptophan	Direct_bilirubin_umol_L_PGS000681	Under 45	metabolomics	0.145118	0.00927855	0.606893	301903	586381	positive	0.978786
valine	Direct_bilirubin_umol_L_PGS000681	Under 45	metabolomics	0.141354	0.00520466	0.653	380621	846042	positive	0.981655
glucose	Direct_bilirubin_umol_L_PGS000681	Under 45	metabolomics	0.149881	0.0147983	0.325096	-603625	612776	negative	0.948429
alpha-ketobutyrate	Direct_bilirubin_umol_L_PGS000681	Under 45	metabolomics	0.155909	0.0209262	0.398712	-2.02504e+06	2.39736e+06	negative	0.95966
adenosine	Direct_bilirubin_umol_L_PGS000681	Under 45	metabolomics	0.128072	-0.0188817	0.0843616	2.72696e+06	1.57647e+06	positive	0.858941
betaine	Direct_bilirubin_umol_L_PGS000681	Under 45	metabolomics	0.138993	0.00218088	0.986959	-14609.3	893337	negative	0.999574
cysteine	Direct_bilirubin_umol_L_PGS000681	Under 45	metabolomics	0.135782	-0.00212525	0.852378	222576	1.19543e+06	positive	0.994819
mannose	Direct_bilirubin_umol_L_PGS000681	Under 45	metabolomics	0.189003	0.0595887	0.0814355	-1.80076e+06	1.03126e+06	negative	0.857075
dimethylglycine	Direct_bilirubin_umol_L_PGS000681	Under 45	metabolomics	0.138003	-0.000432778	0.129669	2.32817e+06	1.53362e+06	positive	0.893647
alanine	Direct_bilirubin_umol_L_PGS000681	Under 45	metabolomics	0.133088	-0.00321837	0.00183021	2.65484e+06	847089	positive	0.420721
tyrosine	Direct_bilirubin_umol_L_PGS000681	Under 45	metabolomics	0.150416	0.0142652	0.268402	1.09747e+06	990437	positive	0.938525
pseudouridine	Direct_bilirubin_umol_L_PGS000681	Under 45	metabolomics	0.200855	0.0738717	0.0785427	1.20744e+06	684867	positive	0.855202
pyruvate	Direct_bilirubin_umol_L_PGS000681	Under 45	metabolomics	0.134689	-0.00193865	0.237633	1.69742e+06	1.43555e+06	positive	0.932219
uracil	Direct_bilirubin_umol_L_PGS000681	Under 45	metabolomics	0.129411	-0.0144088	0.790415	597911	2.24839e+06	positive	0.992319
caffeine	Direct_bilirubin_umol_L_PGS000681	Under 45	metabolomics	0.113312	-0.0361303	0.39037	7.88963e+06	9.17627e+06	positive	0.958715
fructose	Direct_bilirubin_umol_L_PGS000681	Under 45	metabolomics	0.125129	-0.0132999	0.0686435	-3.38686e+06	1.8559e+06	negative	0.844432
adenine	Direct_bilirubin_umol_L_PGS000681	Under 45	metabolomics	0.150118	0.0142093	0.62478	1.01499e+06	2.0739e+06	positive	0.97996
caprate (10:0)	Direct_bilirubin_umol_L_PGS000681	Under 45	metabolomics	0.131503	-0.00767946	0.508745	-1.78182e+06	2.69441e+06	negative	0.971248
margarate (17:0)	Direct_bilirubin_umol_L_PGS000681	Under 45	metabolomics	0.140272	0.00423865	0.207316	-3.00074e+06	2.37644e+06	negative	0.923835
nonadecanoate (19:0)	Direct_bilirubin_umol_L_PGS000681	Under 45	metabolomics	0.131662	-0.00690245	0.326976	-1.56321e+06	1.59309e+06	negative	0.948821
arachidate (20:0)	Direct_bilirubin_umol_L_PGS000681	Under 45	metabolomics	0.143992	0.00854726	0.27605	-1.66953e+06	1.53099e+06	negative	0.939533
asparagine	Direct_bilirubin_umol_L_PGS000681	Under 45	metabolomics	0.145595	0.009832	0.322672	693153	700141	positive	0.948198
N-stearoyl-sphinganine (d18:0/18:0)*	Direct_bilirubin_umol_L_PGS000681	Under 45	metabolomics	0.188041	0.0508863	0.0972953	6.99979e+06	4.21264e+06	positive	0.871891
caprylate (8:0)	Direct_bilirubin_umol_L_PGS000681	Under 45	metabolomics	0.154097	0.0105617	0.174255	-4.65923e+06	3.42377e+06	negative	0.912077
pentadecanoate (15:0)	Direct_bilirubin_umol_L_PGS000681	Under 45	metabolomics	0.123706	-0.014948	0.0999306	-2.60073e+06	1.57772e+06	negative	0.874222
trans-4-hydroxyproline	Direct_bilirubin_umol_L_PGS000681	Under 45	metabolomics	0.109574	-0.0307247	0.405081	1.84991e+06	2.21992e+06	positive	0.960048
allantoin	Direct_bilirubin_umol_L_PGS000681	Under 45	metabolomics	0.151703	0.0177613	0.104961	-1.57678e+06	970705	negative	0.877332
xanthine	Direct_bilirubin_umol_L_PGS000681	Under 45	metabolomics	0.178049	0.0482676	0.500234	-1.19161e+06	1.7663e+06	negative	0.969922
5-oxoproline	Direct_bilirubin_umol_L_PGS000681	Under 45	metabolomics	0.148627	0.0142003	0.54125	602871	986105	positive	0.974192
picolinate	Direct_bilirubin_umol_L_PGS000681	Under 45	metabolomics	0.141023	0.00187944	0.396305	-2.06162e+06	2.42821e+06	negative	0.95917
sarcosine	Direct_bilirubin_umol_L_PGS000681	Under 45	metabolomics	0.121141	-0.0179187	0.230343	1.90855e+06	1.58911e+06	positive	0.931002
pantothenate	Direct_bilirubin_umol_L_PGS000681	Under 45	metabolomics	0.126351	-0.010442	0.220376	-3.11851e+06	2.5413e+06	negative	0.927796
pipecolate	Direct_bilirubin_umol_L_PGS000681	Under 45	metabolomics	0.114401	-0.0245533	0.98129	-131352	5.59792e+06	negative	0.999574
phosphoethanolamine	Direct_bilirubin_umol_L_PGS000681	Under 45	metabolomics	0.145081	0.00836675	0.143967	3.12682e+06	2.13636e+06	positive	0.901465
glycerate	Direct_bilirubin_umol_L_PGS000681	Under 45	metabolomics	0.156537	0.0225124	0.361246	-1.15352e+06	1.26222e+06	negative	0.95415
N-acetylleucine	Direct_bilirubin_umol_L_PGS000681	Under 45	metabolomics	0.165144	0.0324865	0.384364	2.18814e+06	2.5131e+06	positive	0.957756
N-acetylmethionine	Direct_bilirubin_umol_L_PGS000681	Under 45	metabolomics	0.113088	-0.0269504	0.350806	1.52242e+06	1.63009e+06	positive	0.953069
N-acetylvaline	Direct_bilirubin_umol_L_PGS000681	Under 45	metabolomics	0.147475	0.0122966	0.643493	387219	836114	positive	0.981034
erucate (22:1n9)	Direct_bilirubin_umol_L_PGS000681	Under 45	metabolomics	0.13205	-0.00470635	0.22883	-4.383e+06	3.63757e+06	negative	0.930414
bilirubin (Z,Z)	Direct_bilirubin_umol_L_PGS000681	Under 45	metabolomics	0.280379	0.165302	9.11516e-23	1.61429e+07	1.559e+06	positive	7.92336e-19
thyroxine	Direct_bilirubin_umol_L_PGS000681	Under 45	metabolomics	0.183283	0.0532322	0.00538547	-2.95161e+06	1.05566e+06	negative	0.566396
gamma-glutamyltyrosine	Direct_bilirubin_umol_L_PGS000681	Under 45	metabolomics	0.134649	-0.00373301	0.141224	1.89163e+06	1.28356e+06	positive	0.900585
alpha-tocopherol	Direct_bilirubin_umol_L_PGS000681	Under 45	metabolomics	0.166241	0.0337579	0.65301	-443655	986183	negative	0.981655
N-acetylalanine	Direct_bilirubin_umol_L_PGS000681	Under 45	metabolomics	0.124261	-0.0143056	0.676975	338594	812264	positive	0.983675
vanillylmandelate (VMA)	Direct_bilirubin_umol_L_PGS000681	Under 45	metabolomics	0.143461	0.00850269	0.000696613	3.93064e+06	1.15157e+06	positive	0.288806
4-acetamidobutanoate	Direct_bilirubin_umol_L_PGS000681	Under 45	metabolomics	0.144361	0.00723938	0.137683	2.07443e+06	1.39503e+06	positive	0.898513
3-aminoisobutyrate	Direct_bilirubin_umol_L_PGS000681	Under 45	metabolomics	0.134794	-0.00239504	0.43336	1.5573e+06	1.98603e+06	positive	0.962997
citrate	Direct_bilirubin_umol_L_PGS000681	Under 45	metabolomics	0.132667	-0.00456951	0.35253	591685	635805	positive	0.953069
2-aminobutyrate	Direct_bilirubin_umol_L_PGS000681	Under 45	metabolomics	0.153683	0.0200538	0.733735	487568	1.4325e+06	positive	0.987069
urate	Direct_bilirubin_umol_L_PGS000681	Under 45	metabolomics	0.16252	0.0302865	0.62084	443101	895183	positive	0.97996
oleoyl ethanolamide	Direct_bilirubin_umol_L_PGS000681	Under 45	metabolomics	0.146592	0.008649	0.998015	4883.53	1.96168e+06	positive	0.999941
gamma-glutamylglutamine	Direct_bilirubin_umol_L_PGS000681	Under 45	metabolomics	0.132188	-0.00570625	0.875541	-215505	1.37519e+06	negative	0.995508
4-hydroxyphenylpyruvate	Direct_bilirubin_umol_L_PGS000681	Under 45	metabolomics	0.122046	-0.0220383	0.726297	697633	1.9917e+06	positive	0.986719
N-acetylneuraminate	Direct_bilirubin_umol_L_PGS000681	Under 45	metabolomics	0.128566	-0.009903	0.0192687	4.4452e+06	1.89291e+06	positive	0.722304
creatine	Direct_bilirubin_umol_L_PGS000681	Under 45	metabolomics	0.104653	-0.0379179	0.127459	2.88371e+06	1.88862e+06	positive	0.89206
cys-gly, oxidized	Direct_bilirubin_umol_L_PGS000681	Under 45	metabolomics	0.115615	-0.02551	0.0402401	4.38114e+06	2.12989e+06	positive	0.79462
dihomo-linoleate (20:2n6)	Direct_bilirubin_umol_L_PGS000681	Under 45	metabolomics	0.108195	-0.0338122	0.823356	-589177	2.63785e+06	negative	0.993157
gamma-glutamylhistidine	Direct_bilirubin_umol_L_PGS000681	Under 45	metabolomics	0.180333	0.0492558	0.14003	2.23625e+06	1.51284e+06	positive	0.900156
2-hydroxystearate	Direct_bilirubin_umol_L_PGS000681	Under 45	metabolomics	0.121583	-0.0185894	0.612666	-535575	1.05717e+06	negative	0.979388
N1-methyladenosine	Direct_bilirubin_umol_L_PGS000681	Under 45	metabolomics	0.1392	0.00242032	0.0340269	1.64825e+06	775304	positive	0.780342
glycerol	Direct_bilirubin_umol_L_PGS000681	Under 45	metabolomics	0.107005	-0.0354948	0.685466	711441	1.75549e+06	positive	0.984156
choline	Direct_bilirubin_umol_L_PGS000681	Under 45	metabolomics	0.164458	0.0316921	0.0663327	1.40281e+06	762220	positive	0.841943
gamma-glutamylleucine	Direct_bilirubin_umol_L_PGS000681	Under 45	metabolomics	0.136832	0.000255269	0.816737	-251577	1.08498e+06	negative	0.993085
3-methoxytyrosine	Direct_bilirubin_umol_L_PGS000681	Under 45	metabolomics	0.133963	-0.00423485	0.698221	-1.0213e+06	2.63249e+06	negative	0.984926
beta-hydroxyisovalerate	Direct_bilirubin_umol_L_PGS000681	Under 45	metabolomics	0.143996	0.00768967	0.747376	630589	1.95659e+06	positive	0.988296
palmitoyl ethanolamide	Direct_bilirubin_umol_L_PGS000681	Under 45	metabolomics	0.151489	0.0180756	0.16609	1.8284e+06	1.31824e+06	positive	0.909245
N-palmitoyl-sphingosine (d18:1/16:0)	Direct_bilirubin_umol_L_PGS000681	Under 45	metabolomics	0.175671	0.0429995	0.7574	547083	1.77004e+06	positive	0.988788
1-palmitoyl-2-oleoyl-GPE (16:0/18:1)	Direct_bilirubin_umol_L_PGS000681	Under 45	metabolomics	0.131865	-0.00549855	0.115115	5.46532e+06	3.46233e+06	positive	0.885404
1-palmitoyl-2-linoleoyl-GPI (16:0/18:2)	Direct_bilirubin_umol_L_PGS000681	Under 45	metabolomics	0.163511	0.0277178	0.927382	-309719	3.39646e+06	negative	0.997602
1-palmitoyl-2-linoleoyl-GPC (16:0/18:2)	Direct_bilirubin_umol_L_PGS000681	Under 45	metabolomics	0.179436	0.0479359	0.547499	347096	576619	positive	0.974428
stearoyl sphingomyelin (d18:1/18:0)	Direct_bilirubin_umol_L_PGS000681	Under 45	metabolomics	0.171964	0.0409457	0.0955107	-1.70892e+06	1.02309e+06	negative	0.870574
1-palmitoyl-2-oleoyl-GPC (16:0/18:1)	Direct_bilirubin_umol_L_PGS000681	Under 45	metabolomics	0.158679	0.0247108	0.271122	-862543	782866	negative	0.939081
N-stearoyl-sphingosine (d18:1/18:0)*	Direct_bilirubin_umol_L_PGS000681	Under 45	metabolomics	0.173092	0.042528	0.352521	1.64687e+06	1.76965e+06	positive	0.953069
glycochenodeoxycholate	Direct_bilirubin_umol_L_PGS000681	Under 45	metabolomics	0.138679	0.00152619	0.293458	9.52441e+06	9.05587e+06	positive	0.942897
taurochenodeoxycholate	Direct_bilirubin_umol_L_PGS000681	Under 45	metabolomics	0.137861	-0.00270535	0.905505	1.64503e+06	1.38499e+07	positive	0.996587
taurodeoxycholate	Direct_bilirubin_umol_L_PGS000681	Under 45	metabolomics	0.156865	0.0111614	0.575592	-8.27695e+06	1.47734e+07	negative	0.976299
2-hydroxyhippurate (salicylurate)	Direct_bilirubin_umol_L_PGS000681	Under 45	metabolomics	0.146441	0.00386443	0.511886	9.57147e+07	1.45812e+08	positive	0.971394
eicosapentaenoate (EPA; 20:5n3)	Direct_bilirubin_umol_L_PGS000681	Under 45	metabolomics	0.116299	-0.0250174	0.405222	-2.5059e+06	3.00799e+06	negative	0.960143
methylsuccinate	Direct_bilirubin_umol_L_PGS000681	Under 45	metabolomics	0.134542	-0.00565092	0.979516	-40138.5	1.56246e+06	negative	0.999574
ethylmalonate	Direct_bilirubin_umol_L_PGS000681	Under 45	metabolomics	0.181364	0.0507309	0.204683	-4.91456e+06	3.86948e+06	negative	0.923209
carnitine	Direct_bilirubin_umol_L_PGS000681	Under 45	metabolomics	0.135687	-0.00194303	0.606363	312949	606939	positive	0.978786
3-phenylpropionate (hydrocinnamate)	Direct_bilirubin_umol_L_PGS000681	Under 45	metabolomics	0.180804	0.0405308	0.901236	-620338	4.99579e+06	negative	0.996537
hippurate	Direct_bilirubin_umol_L_PGS000681	Under 45	metabolomics	0.157136	0.024052	0.956454	-210954	3.86133e+06	negative	0.998914
3-methyl-2-oxovalerate	Direct_bilirubin_umol_L_PGS000681	Under 45	metabolomics	0.135017	-0.00242741	0.712381	436952	1.18453e+06	positive	0.985749
methionine sulfoxide	Direct_bilirubin_umol_L_PGS000681	Under 45	metabolomics	0.138667	0.00151215	0.0181962	2.20241e+06	929339	positive	0.715741
3-methylhistidine	Direct_bilirubin_umol_L_PGS000681	Under 45	metabolomics	0.148822	0.0135708	0.299608	5.38622e+06	5.18696e+06	positive	0.943983
5-hydroxylysine	Direct_bilirubin_umol_L_PGS000681	Under 45	metabolomics	0.175107	0.0409055	0.658267	859418	1.94178e+06	positive	0.982031
4-guanidinobutanoate	Direct_bilirubin_umol_L_PGS000681	Under 45	metabolomics	0.163912	0.0299232	0.302895	3.39464e+06	3.29136e+06	positive	0.94486
glucuronate	Direct_bilirubin_umol_L_PGS000681	Under 45	metabolomics	0.17341	0.0426202	0.47019	1.03178e+06	1.42758e+06	positive	0.966947
imidazole lactate	Direct_bilirubin_umol_L_PGS000681	Under 45	metabolomics	0.132294	-0.00587527	0.218223	2.56443e+06	2.07997e+06	positive	0.926907
kynurenine	Direct_bilirubin_umol_L_PGS000681	Under 45	metabolomics	0.147014	0.0111882	0.146618	1.51032e+06	1.03875e+06	positive	0.902089
glycerophosphorylcholine (GPC)	Direct_bilirubin_umol_L_PGS000681	Under 45	metabolomics	0.200464	0.0744866	0.396832	5.60341e+06	6.60734e+06	positive	0.959322
N-acetylglutamate	Direct_bilirubin_umol_L_PGS000681	Under 45	metabolomics	0.1881	0.0484382	0.836453	347190	1.68085e+06	positive	0.993822
ribitol	Direct_bilirubin_umol_L_PGS000681	Under 45	metabolomics	0.170162	0.0394106	0.0152596	2.6286e+06	1.07952e+06	positive	0.695103
theophylline	Direct_bilirubin_umol_L_PGS000681	Under 45	metabolomics	0.163766	0.0225105	0.54241	2.50816e+06	4.11415e+06	positive	0.974277
quinate	Direct_bilirubin_umol_L_PGS000681	Under 45	metabolomics	0.179015	0.0451582	0.907142	-542812	4.65101e+06	negative	0.996707
theobromine	Direct_bilirubin_umol_L_PGS000681	Under 45	metabolomics	0.159536	0.0236846	0.57494	-3.48721e+06	6.21397e+06	negative	0.976299
paraxanthine	Direct_bilirubin_umol_L_PGS000681	Under 45	metabolomics	0.163464	0.0182322	0.121602	7.03827e+06	4.5375e+06	positive	0.888448
indolelactate	Direct_bilirubin_umol_L_PGS000681	Under 45	metabolomics	0.187256	0.058385	0.431573	-1.31919e+06	1.67585e+06	negative	0.962751
3-indoxyl sulfate	Direct_bilirubin_umol_L_PGS000681	Under 45	metabolomics	0.127034	-0.0119737	0.341588	1.96621e+06	2.06536e+06	positive	0.951538
gamma-glutamylphenylalanine	Direct_bilirubin_umol_L_PGS000681	Under 45	metabolomics	0.144245	0.00225008	0.371058	1.21899e+06	1.36141e+06	positive	0.956156
4-methyl-2-oxopentanoate	Direct_bilirubin_umol_L_PGS000681	Under 45	metabolomics	0.157408	0.0243674	0.621375	-564109	1.1414e+06	negative	0.97996
1,5-anhydroglucitol (1,5-AG)	Direct_bilirubin_umol_L_PGS000681	Under 45	metabolomics	0.147091	0.0118517	0.204039	1.87729e+06	1.47599e+06	positive	0.922968
1-palmityl-GPC (O-16:0)	Direct_bilirubin_umol_L_PGS000681	Under 45	metabolomics	0.155981	0.0212975	0.582827	1.68554e+06	3.06662e+06	positive	0.976861
1-stearoyl-2-arachidonoyl-GPI (18:0/20:4)	Direct_bilirubin_umol_L_PGS000681	Under 45	metabolomics	0.143401	0.00757719	0.878595	150799	986690	positive	0.995771
sphingosine 1-phosphate	Direct_bilirubin_umol_L_PGS000681	Under 45	metabolomics	0.160258	0.0251061	0.827424	342783	1.57147e+06	positive	0.99324
1-stearoyl-2-oleoyl-GPS (18:0/18:1)	Direct_bilirubin_umol_L_PGS000681	Under 45	metabolomics	0.115626	-0.027631	0.927198	405882	4.43971e+06	positive	0.997572
1-stearoyl-GPI (18:0)	Direct_bilirubin_umol_L_PGS000681	Under 45	metabolomics	0.140535	0.00396773	0.760881	-623894	2.04891e+06	negative	0.989069
1,2-dipalmitoyl-GPC (16:0/16:0)	Direct_bilirubin_umol_L_PGS000681	Under 45	metabolomics	0.185283	0.0541588	0.933808	-59731.5	718789	negative	0.998197
docosahexaenoate (DHA; 22:6n3)	Direct_bilirubin_umol_L_PGS000681	Under 45	metabolomics	0.133696	-0.00251588	0.471659	-1.72802e+06	2.39884e+06	negative	0.967099
1-myristoyl-2-palmitoyl-GPC (14:0/16:0)	Direct_bilirubin_umol_L_PGS000681	Under 45	metabolomics	0.127008	-0.0125967	0.147644	4.2448e+06	2.92685e+06	positive	0.902265
alpha-hydroxyisocaproate	Direct_bilirubin_umol_L_PGS000681	Under 45	metabolomics	0.166125	0.0347367	0.936825	-137193	1.72997e+06	negative	0.998397
maleate	Direct_bilirubin_umol_L_PGS000681	Under 45	metabolomics	0.159445	0.0184122	0.255918	-2.48504e+06	2.18455e+06	negative	0.936076
2-hydroxyoctanoate	Direct_bilirubin_umol_L_PGS000681	Under 45	metabolomics	0.141752	0.00362151	0.9895	-51721.8	3.92797e+06	negative	0.999601
3-hydroxyoctanoate	Direct_bilirubin_umol_L_PGS000681	Under 45	metabolomics	0.121359	-0.017666	0.206069	-2.95721e+06	2.33553e+06	negative	0.9235
phenyllactate (PLA)	Direct_bilirubin_umol_L_PGS000681	Under 45	metabolomics	0.155149	0.0206188	0.149022	2.54561e+06	1.76123e+06	positive	0.902808
palmitoylcarnitine (C16)	Direct_bilirubin_umol_L_PGS000681	Under 45	metabolomics	0.149733	0.014052	0.765587	-363481	1.21841e+06	negative	0.989409
hexanoylcarnitine (C6)	Direct_bilirubin_umol_L_PGS000681	Under 45	metabolomics	0.151368	0.0173737	0.60479	-1.5118e+06	2.91927e+06	negative	0.978587
N-acetylaspartate (NAA)	Direct_bilirubin_umol_L_PGS000681	Under 45	metabolomics	0.155513	0.022173	0.704694	-328561	866411	negative	0.985111
dehydroepiandrosterone sulfate (DHEA-S)	Direct_bilirubin_umol_L_PGS000681	Under 45	metabolomics	0.14951	0.0137935	0.209181	3.15767e+06	2.51098e+06	positive	0.924459
acetylcarnitine (C2)	Direct_bilirubin_umol_L_PGS000681	Under 45	metabolomics	0.173649	0.0423433	0.201837	-1.7959e+06	1.40512e+06	negative	0.92187
cysteine s-sulfate	Direct_bilirubin_umol_L_PGS000681	Under 45	metabolomics	0.111697	-0.036353	0.938386	-586192	7.5793e+06	negative	0.998426
1-palmitoylglycerol (16:0)	Direct_bilirubin_umol_L_PGS000681	Under 45	metabolomics	0.125569	-0.0151654	0.683853	4.39265e+06	1.07804e+07	positive	0.984071
tartronate (hydroxymalonate)	Direct_bilirubin_umol_L_PGS000681	Under 45	metabolomics	0.141355	0.00462842	0.890444	233763	1.69618e+06	positive	0.99612
oxalate (ethanedioate)	Direct_bilirubin_umol_L_PGS000681	Under 45	metabolomics	0.157979	0.0233274	0.699144	-498045	1.28789e+06	negative	0.984983
erythritol	Direct_bilirubin_umol_L_PGS000681	Under 45	metabolomics	0.136997	-0.00525644	0.742414	3.5329e+07	1.07429e+08	positive	0.987811
3-hydroxymyristate	Direct_bilirubin_umol_L_PGS000681	Under 45	metabolomics	0.118129	-0.0231963	0.523615	-1.48578e+06	2.32785e+06	negative	0.971726
iminodiacetate (IDA)	Direct_bilirubin_umol_L_PGS000681	Under 45	metabolomics	0.124784	-0.0151761	0.340882	1.72844e+06	1.81294e+06	positive	0.951508
1-oleoylglycerol (18:1)	Direct_bilirubin_umol_L_PGS000681	Under 45	metabolomics	0.155333	0.0196796	0.740738	1.63935e+06	4.95164e+06	positive	0.987666
3-methyl-2-oxobutyrate	Direct_bilirubin_umol_L_PGS000681	Under 45	metabolomics	0.154196	0.0212083	0.87016	-170687	1.04368e+06	negative	0.995307
homoarginine	Direct_bilirubin_umol_L_PGS000681	Under 45	metabolomics	0.143963	0.00879959	0.172114	2.62481e+06	1.91942e+06	positive	0.911895
homocitrulline	Direct_bilirubin_umol_L_PGS000681	Under 45	metabolomics	0.110629	-0.0356494	0.957083	175478	3.25898e+06	positive	0.998914
3-hydroxydecanoate	Direct_bilirubin_umol_L_PGS000681	Under 45	metabolomics	0.105762	-0.03724	0.33891	-2.8992e+06	3.02852e+06	negative	0.951211
EDTA	Direct_bilirubin_umol_L_PGS000681	Under 45	metabolomics	0.116235	-0.0224311	0.668628	273255	638003	positive	0.982945
N-acetylglycine	Direct_bilirubin_umol_L_PGS000681	Under 45	metabolomics	0.234036	0.112839	0.0316278	-8.1521e+06	3.78205e+06	negative	0.774847
ribonate	Direct_bilirubin_umol_L_PGS000681	Under 45	metabolomics	0.158618	0.0234919	0.0776242	2.68121e+06	1.51606e+06	positive	0.854784
threonate	Direct_bilirubin_umol_L_PGS000681	Under 45	metabolomics	0.153805	0.0193462	0.390008	-2.15719e+06	2.50721e+06	negative	0.958715
indoleacetate	Direct_bilirubin_umol_L_PGS000681	Under 45	metabolomics	0.114927	-0.0236539	0.242126	3.72526e+06	3.18089e+06	positive	0.932788
1-linoleoylglycerol (18:2)	Direct_bilirubin_umol_L_PGS000681	Under 45	metabolomics	0.135409	-0.00197338	0.274319	4.07331e+06	3.72181e+06	positive	0.939251
1-methylhistidine	Direct_bilirubin_umol_L_PGS000681	Under 45	metabolomics	0.169361	0.037094	0.211784	1.97746e+06	1.5815e+06	positive	0.925358
butyrylcarnitine (C4)	Direct_bilirubin_umol_L_PGS000681	Under 45	metabolomics	0.185224	0.0565755	0.308733	-4.08986e+06	4.0137e+06	negative	0.946267
isobutyrylcarnitine (C4)	Direct_bilirubin_umol_L_PGS000681	Under 45	metabolomics	0.133985	-0.00420903	0.579134	1.48014e+06	2.66675e+06	positive	0.976712
androsterone sulfate	Direct_bilirubin_umol_L_PGS000681	Under 45	metabolomics	0.113515	-0.0276445	0.823011	826356	3.69242e+06	positive	0.993157
indolepropionate	Direct_bilirubin_umol_L_PGS000681	Under 45	metabolomics	0.206098	0.0807445	0.812926	-1.27502e+06	5.38472e+06	negative	0.993085
trigonelline (N'-methylnicotinate)	Direct_bilirubin_umol_L_PGS000681	Under 45	metabolomics	0.140074	0.00314318	0.36494	-5.16808e+06	5.69882e+06	negative	0.954994
dodecanedioate (C12-DC)	Direct_bilirubin_umol_L_PGS000681	Under 45	metabolomics	0.141585	0.00661463	0.0117941	1.18927e+07	4.70446e+06	positive	0.669104
N-acetyltyrosine	Direct_bilirubin_umol_L_PGS000681	Under 45	metabolomics	0.178425	0.0487032	0.00909164	4.39905e+06	1.67945e+06	positive	0.639576
3-methylxanthine	Direct_bilirubin_umol_L_PGS000681	Under 45	metabolomics	0.222496	0.0887513	0.351318	-4.46111e+06	4.78128e+06	negative	0.953069
3-hydroxylaurate	Direct_bilirubin_umol_L_PGS000681	Under 45	metabolomics	0.11637	-0.0255405	0.319097	-3.1633e+06	3.17161e+06	negative	0.947774
pyridoxate	Direct_bilirubin_umol_L_PGS000681	Under 45	metabolomics	0.112627	-0.028077	0.781932	-1.15132e+06	4.157e+06	negative	0.991415
gamma-glutamylvaline	Direct_bilirubin_umol_L_PGS000681	Under 45	metabolomics	0.173414	0.0386441	0.554409	1.15071e+06	1.94508e+06	positive	0.975033
pyroglutamylvaline	Direct_bilirubin_umol_L_PGS000681	Under 45	metabolomics	0.15207	0.00451846	0.310062	1.71752e+06	1.68999e+06	positive	0.946467
propionylglycine	Direct_bilirubin_umol_L_PGS000681	Under 45	metabolomics	0.173366	0.0349782	0.407287	-2.17713e+06	2.62477e+06	negative	0.960573
propionylcarnitine (C3)	Direct_bilirubin_umol_L_PGS000681	Under 45	metabolomics	0.106513	-0.0354603	0.445236	1.11156e+06	1.45487e+06	positive	0.964804
pro-hydroxy-pro	Direct_bilirubin_umol_L_PGS000681	Under 45	metabolomics	0.144749	0.00827276	0.893835	248565	1.86154e+06	positive	0.996125
3-hydroxy-2-ethylpropionate	Direct_bilirubin_umol_L_PGS000681	Under 45	metabolomics	0.160778	0.0274269	0.729892	-456627	1.32174e+06	negative	0.986784
3-carboxy-4-methyl-5-propyl-2-furanpropanoate (CMPF)	Direct_bilirubin_umol_L_PGS000681	Under 45	metabolomics	0.12688	-0.0118568	0.730778	1.39106e+06	4.04032e+06	positive	0.986893
docosapentaenoate (n3 DPA; 22:5n3)	Direct_bilirubin_umol_L_PGS000681	Under 45	metabolomics	0.139489	0.00188048	0.439786	-1.85918e+06	2.40448e+06	negative	0.964176
docosadienoate (22:2n6)	Direct_bilirubin_umol_L_PGS000681	Under 45	metabolomics	0.0998065	-0.0432327	0.781177	632072	2.2741e+06	positive	0.991369
adrenate (22:4n6)	Direct_bilirubin_umol_L_PGS000681	Under 45	metabolomics	0.125904	-0.0135794	0.321854	2.8285e+06	2.85218e+06	positive	0.948198
10-undecenoate (11:1n1)	Direct_bilirubin_umol_L_PGS000681	Under 45	metabolomics	0.148251	0.0108717	0.066306	-3.99742e+06	2.17171e+06	negative	0.841859
myristoleate (14:1n5)	Direct_bilirubin_umol_L_PGS000681	Under 45	metabolomics	0.121482	-0.0184095	0.868745	-597285	3.61239e+06	negative	0.995307
1-methyl-4-imidazoleacetate	Direct_bilirubin_umol_L_PGS000681	Under 45	metabolomics	0.138082	0.00054168	0.0387685	3.03751e+06	1.46567e+06	positive	0.793404
stearidonate (18:4n3)	Direct_bilirubin_umol_L_PGS000681	Under 45	metabolomics	0.129014	-0.00997266	0.613361	1.50636e+06	2.97925e+06	positive	0.97939
5-dodecenoate (12:1n7)	Direct_bilirubin_umol_L_PGS000681	Under 45	metabolomics	0.133449	-0.00337497	0.887522	-532901	3.76564e+06	negative	0.99612
octanoylcarnitine (C8)	Direct_bilirubin_umol_L_PGS000681	Under 45	metabolomics	0.137971	0.00128546	0.289326	-4.20536e+06	3.96436e+06	negative	0.942477
decanoylcarnitine (C10)	Direct_bilirubin_umol_L_PGS000681	Under 45	metabolomics	0.129243	-0.00795585	0.171808	-5.73276e+06	4.18915e+06	negative	0.911782
N-acetylglutamine	Direct_bilirubin_umol_L_PGS000681	Under 45	metabolomics	0.165717	0.0296924	0.925096	-220463	2.34366e+06	negative	0.997361
N-acetyltryptophan	Direct_bilirubin_umol_L_PGS000681	Under 45	metabolomics	0.156617	0.0237313	0.0363986	3.78612e+06	1.80431e+06	positive	0.787113
N-acetylphenylalanine	Direct_bilirubin_umol_L_PGS000681	Under 45	metabolomics	0.160147	0.0269776	0.224283	1.97772e+06	1.62533e+06	positive	0.92898
1-palmitoyl-GPC (16:0)	Direct_bilirubin_umol_L_PGS000681	Under 45	metabolomics	0.16471	0.0319834	0.664222	427171	983438	positive	0.98253
1-margaroyl-GPC (17:0)	Direct_bilirubin_umol_L_PGS000681	Under 45	metabolomics	0.145898	0.0116055	0.922194	-206633	2.1145e+06	negative	0.997169
N-acetylarginine	Direct_bilirubin_umol_L_PGS000681	Under 45	metabolomics	0.123231	-0.0157912	0.568257	994895	1.74231e+06	positive	0.97588
piperine	Direct_bilirubin_umol_L_PGS000681	Under 45	metabolomics	0.157285	0.0236625	0.680042	-3.11535e+06	7.54941e+06	negative	0.984002
myristoylcarnitine (C14)	Direct_bilirubin_umol_L_PGS000681	Under 45	metabolomics	0.160833	0.0280533	0.83114	424787	1.99096e+06	positive	0.993557
1-stearoyl-GPC (18:0)	Direct_bilirubin_umol_L_PGS000681	Under 45	metabolomics	0.150069	0.0158691	0.716005	479854	1.31821e+06	positive	0.98609
1-oleoyl-GPC (18:1)	Direct_bilirubin_umol_L_PGS000681	Under 45	metabolomics	0.162555	0.0294864	0.967861	-54439.7	1.35046e+06	negative	0.999336
N-acetylthreonine	Direct_bilirubin_umol_L_PGS000681	Under 45	metabolomics	0.139902	0.003811	0.614133	562358	1.11465e+06	positive	0.979556
10-nonadecenoate (19:1n9)	Direct_bilirubin_umol_L_PGS000681	Under 45	metabolomics	0.134207	-0.0042464	0.442667	-1.89225e+06	2.46275e+06	negative	0.964472
10-heptadecenoate (17:1n7)	Direct_bilirubin_umol_L_PGS000681	Under 45	metabolomics	0.121725	-0.0178319	0.397873	-2.43758e+06	2.88063e+06	negative	0.959422
epiandrosterone sulfate	Direct_bilirubin_umol_L_PGS000681	Under 45	metabolomics	0.113581	-0.028171	0.352814	-3.30149e+06	3.54973e+06	negative	0.953069
N-acetylhistidine	Direct_bilirubin_umol_L_PGS000681	Under 45	metabolomics	0.116431	-0.0251667	0.382434	1.47364e+06	1.68562e+06	positive	0.95771
gamma-glutamylglycine	Direct_bilirubin_umol_L_PGS000681	Under 45	metabolomics	0.168939	0.0374423	0.624237	723330	1.47565e+06	positive	0.97996
gamma-glutamyltryptophan	Direct_bilirubin_umol_L_PGS000681	Under 45	metabolomics	0.164211	0.0239775	0.460706	889978	1.20541e+06	positive	0.966469
stachydrine	Direct_bilirubin_umol_L_PGS000681	Under 45	metabolomics	0.171831	0.0402359	0.272773	-8.35497e+06	7.6094e+06	negative	0.939143
alpha-hydroxyisovalerate	Direct_bilirubin_umol_L_PGS000681	Under 45	metabolomics	0.125567	-0.0127921	0.588472	-2.43439e+06	4.49629e+06	negative	0.977445
gamma-glutamylmethionine	Direct_bilirubin_umol_L_PGS000681	Under 45	metabolomics	0.144819	0.00835424	0.48572	954892	1.36866e+06	positive	0.968081
gamma-glutamylthreonine	Direct_bilirubin_umol_L_PGS000681	Under 45	metabolomics	0.106433	-0.0361578	0.0351124	3.1138e+06	1.47352e+06	positive	0.783471
p-cresol sulfate	Direct_bilirubin_umol_L_PGS000681	Under 45	metabolomics	0.134733	-0.00334098	0.499449	1.788e+06	2.64543e+06	positive	0.969914
erythronate*	Direct_bilirubin_umol_L_PGS000681	Under 45	metabolomics	0.116933	-0.0233845	0.717984	-398017	1.10141e+06	negative	0.986213
eicosenoate (20:1)	Direct_bilirubin_umol_L_PGS000681	Under 45	metabolomics	0.093221	-0.0499546	0.53434	-1.76433e+06	2.83723e+06	negative	0.973216
linolenate [alpha or gamma; (18:3n3 or 6)]	Direct_bilirubin_umol_L_PGS000681	Under 45	metabolomics	0.0972733	-0.0461685	0.881702	418182	2.80862e+06	positive	0.995888
aconitate [cis or trans]	Direct_bilirubin_umol_L_PGS000681	Under 45	metabolomics	0.134922	-0.00282934	0.731902	329875	962295	positive	0.986951
1-myristoyl-GPC (14:0)	Direct_bilirubin_umol_L_PGS000681	Under 45	metabolomics	0.170667	0.0388877	0.0350858	4.80558e+06	2.2738e+06	positive	0.783348
1-arachidoyl-GPC (20:0)	Direct_bilirubin_umol_L_PGS000681	Under 45	metabolomics	0.174781	0.0334769	0.548414	-1.40129e+06	2.33313e+06	negative	0.974494
stearoylcarnitine (C18)	Direct_bilirubin_umol_L_PGS000681	Under 45	metabolomics	0.146521	0.0106168	0.669515	649404	1.52056e+06	positive	0.983017
laurylcarnitine (C12)	Direct_bilirubin_umol_L_PGS000681	Under 45	metabolomics	0.15016	0.0145478	0.641843	-1.36753e+06	2.93823e+06	negative	0.980697
isovalerylcarnitine (C5)	Direct_bilirubin_umol_L_PGS000681	Under 45	metabolomics	0.123876	-0.0159305	0.200008	2.32536e+06	1.81197e+06	positive	0.921045
1-linoleoyl-GPC (18:2)	Direct_bilirubin_umol_L_PGS000681	Under 45	metabolomics	0.168953	0.0363394	0.822552	280681	1.25087e+06	positive	0.993157
7-methylxanthine	Direct_bilirubin_umol_L_PGS000681	Under 45	metabolomics	0.190134	0.0492057	0.33901	-4.77202e+06	4.98547e+06	negative	0.951243
1,7-dimethylurate	Direct_bilirubin_umol_L_PGS000681	Under 45	metabolomics	0.15514	0.0133851	0.385735	3.31594e+06	3.8192e+06	positive	0.957991
5-acetylamino-6-amino-3-methyluracil	Direct_bilirubin_umol_L_PGS000681	Under 45	metabolomics	0.154408	0.0112488	0.418747	3.36157e+06	4.15341e+06	positive	0.961289
N1-methylinosine	Direct_bilirubin_umol_L_PGS000681	Under 45	metabolomics	0.155993	0.0201547	0.0908521	2.23846e+06	1.32107e+06	positive	0.865205
N2,N2-dimethylguanosine	Direct_bilirubin_umol_L_PGS000681	Under 45	metabolomics	0.132603	-0.00493385	0.0258759	2.21437e+06	990720	positive	0.75466
N4-acetylcytidine	Direct_bilirubin_umol_L_PGS000681	Under 45	metabolomics	0.15179	0.00851125	0.259098	2.63546e+06	2.33233e+06	positive	0.936408
N6-carbamoylthreonyladenosine	Direct_bilirubin_umol_L_PGS000681	Under 45	metabolomics	0.157409	0.0226668	0.198631	1.18559e+06	921005	positive	0.920719
orotidine	Direct_bilirubin_umol_L_PGS000681	Under 45	metabolomics	0.130095	-0.0102119	0.221224	2.15806e+06	1.76179e+06	positive	0.927938
phenylacetylglutamine	Direct_bilirubin_umol_L_PGS000681	Under 45	metabolomics	0.142184	0.0055894	0.021349	5.82438e+06	2.52195e+06	positive	0.73083
4-hydroxyhippurate	Direct_bilirubin_umol_L_PGS000681	Under 45	metabolomics	0.134211	-0.00307048	0.697998	2.85726e+06	7.35913e+06	positive	0.984895
5,6-dihydrouridine	Direct_bilirubin_umol_L_PGS000681	Under 45	metabolomics	0.172446	0.0415042	0.830745	174410	815520	positive	0.993507
3-(3-amino-3-carboxypropyl)uridine*	Direct_bilirubin_umol_L_PGS000681	Under 45	metabolomics	0.177336	0.0432057	0.201244	1.23762e+06	967005	positive	0.921601
5-methyluridine (ribothymidine)	Direct_bilirubin_umol_L_PGS000681	Under 45	metabolomics	0.133897	-0.00285646	0.672897	-351076	831072	negative	0.983426
isovalerylglycine	Direct_bilirubin_umol_L_PGS000681	Under 45	metabolomics	0.151124	0.00932997	0.228148	3.26026e+06	2.70159e+06	positive	0.930072
7-methylguanine	Direct_bilirubin_umol_L_PGS000681	Under 45	metabolomics	0.173133	0.0414659	0.0200464	1.94106e+06	831856	positive	0.725717
1-stearoyl-GPE (18:0)	Direct_bilirubin_umol_L_PGS000681	Under 45	metabolomics	0.176473	0.0447785	0.22274	1.82169e+06	1.49209e+06	positive	0.928456
N1-Methyl-2-pyridone-5-carboxamide	Direct_bilirubin_umol_L_PGS000681	Under 45	metabolomics	0.126223	-0.0120325	0.192014	2.30114e+06	1.76129e+06	positive	0.918364
gamma-glutamylisoleucine*	Direct_bilirubin_umol_L_PGS000681	Under 45	metabolomics	0.150655	0.0156952	0.260009	1.46602e+06	1.29998e+06	positive	0.936408
oleoylcarnitine (C18:1)	Direct_bilirubin_umol_L_PGS000681	Under 45	metabolomics	0.115086	-0.0258241	0.83557	-311995	1.5023e+06	negative	0.993806
2-methylbutyrylcarnitine (C5)	Direct_bilirubin_umol_L_PGS000681	Under 45	metabolomics	0.163894	0.0223412	0.814948	386119	1.64877e+06	positive	0.993085
phenol sulfate	Direct_bilirubin_umol_L_PGS000681	Under 45	metabolomics	0.157374	0.0231974	0.632139	-2.2227e+06	4.64001e+06	negative	0.980412
1-palmitoleoyl-GPC (16:1)*	Direct_bilirubin_umol_L_PGS000681	Under 45	metabolomics	0.163522	0.0317245	0.197761	2.49827e+06	1.93701e+06	positive	0.920205
pyroglutamine*	Direct_bilirubin_umol_L_PGS000681	Under 45	metabolomics	0.125472	-0.0131956	0.0785549	-5.49116e+06	3.11476e+06	negative	0.855202
2-hydroxy-3-methylvalerate	Direct_bilirubin_umol_L_PGS000681	Under 45	metabolomics	0.131229	-0.00594568	0.879603	-592585	3.91007e+06	negative	0.995853
homostachydrine*	Direct_bilirubin_umol_L_PGS000681	Under 45	metabolomics	0.119719	-0.0241181	0.2827	-1.10213e+07	1.02473e+07	negative	0.941407
1-arachidonoyl-GPC (20:4n6)*	Direct_bilirubin_umol_L_PGS000681	Under 45	metabolomics	0.160589	0.0272075	0.982098	-38836.3	1.72985e+06	negative	0.999574
1-dihomo-linolenoyl-GPC (20:3n3 or 6)*	Direct_bilirubin_umol_L_PGS000681	Under 45	metabolomics	0.16721	0.0357171	0.393843	1.6946e+06	1.9856e+06	positive	0.958992
1-dihomo-linoleoyl-GPC (20:2)*	Direct_bilirubin_umol_L_PGS000681	Under 45	metabolomics	0.185602	0.0561961	0.607834	1.08443e+06	2.1118e+06	positive	0.978786
2-arachidonoyl-GPC (20:4)*	Direct_bilirubin_umol_L_PGS000681	Under 45	metabolomics	0.164655	0.0313554	0.288825	1.83171e+06	1.72493e+06	positive	0.942413
2-oleoyl-GPC (18:1)*	Direct_bilirubin_umol_L_PGS000681	Under 45	metabolomics	0.165012	0.0320522	0.628762	-883985	1.82722e+06	negative	0.980138
2-linoleoyl-GPC (18:2)*	Direct_bilirubin_umol_L_PGS000681	Under 45	metabolomics	0.17768	0.0475656	0.408652	1.3745e+06	1.66203e+06	positive	0.960701
2-palmitoyl-GPC (16:0)*	Direct_bilirubin_umol_L_PGS000681	Under 45	metabolomics	0.154221	0.0192562	0.700787	-716917	1.86458e+06	negative	0.984983
2-myristoyl-GPC (14:0)*	Direct_bilirubin_umol_L_PGS000681	Under 45	metabolomics	0.153615	0.0147121	0.134555	3.57031e+06	2.38174e+06	positive	0.89705
1-docosahexaenoyl-GPC (22:6)*	Direct_bilirubin_umol_L_PGS000681	Under 45	metabolomics	0.127774	-0.0108213	0.694692	-835564	2.12755e+06	negative	0.984608
1-palmitoyl-GPE (16:0)	Direct_bilirubin_umol_L_PGS000681	Under 45	metabolomics	0.148093	0.0135816	0.230432	1.73035e+06	1.44101e+06	positive	0.931002
1-oleoyl-GPE (18:1)	Direct_bilirubin_umol_L_PGS000681	Under 45	metabolomics	0.154953	0.0206761	0.103679	3.17358e+06	1.94648e+06	positive	0.876822
1-linoleoyl-GPE (18:2)*	Direct_bilirubin_umol_L_PGS000681	Under 45	metabolomics	0.128264	-0.0111395	0.0889507	3.01303e+06	1.76769e+06	positive	0.864801
1-arachidonoyl-GPE (20:4n6)*	Direct_bilirubin_umol_L_PGS000681	Under 45	metabolomics	0.157739	0.0244697	0.0341562	2.38313e+06	1.1218e+06	positive	0.780565
2-hydroxypalmitate	Direct_bilirubin_umol_L_PGS000681	Under 45	metabolomics	0.135131	-0.00114019	0.475281	-766260	1.07247e+06	negative	0.967277
isobutyrylglycine	Direct_bilirubin_umol_L_PGS000681	Under 45	metabolomics	0.122838	-0.0319551	0.964645	85807.5	1.93471e+06	positive	0.999247
glutarylcarnitine (C5-DC)	Direct_bilirubin_umol_L_PGS000681	Under 45	metabolomics	0.141036	0.00454824	0.593974	984349	1.84525e+06	positive	0.977809
tiglylcarnitine (C5:1-DC)	Direct_bilirubin_umol_L_PGS000681	Under 45	metabolomics	0.137881	0.000601072	0.563871	1.12074e+06	1.94064e+06	positive	0.975557
hydroquinone sulfate	Direct_bilirubin_umol_L_PGS000681	Under 45	metabolomics	0.146851	9.37186e-05	0.0996103	-1.04488e+07	6.33163e+06	negative	0.874208
catechol sulfate	Direct_bilirubin_umol_L_PGS000681	Under 45	metabolomics	0.180143	0.0498687	0.114718	-5.72659e+06	3.62384e+06	negative	0.8854
7-alpha-hydroxy-3-oxo-4-cholestenoate (7-Hoca)	Direct_bilirubin_umol_L_PGS000681	Under 45	metabolomics	0.141341	0.00519006	0.681001	590039	1.43439e+06	positive	0.984007
tetradecanedioate (C14-DC)	Direct_bilirubin_umol_L_PGS000681	Under 45	metabolomics	0.132895	-0.00459522	0.0749622	7.38479e+06	4.138e+06	positive	0.852158
hexadecanedioate (C16-DC)	Direct_bilirubin_umol_L_PGS000681	Under 45	metabolomics	0.138965	0.00185717	0.328533	3.51731e+06	3.59612e+06	positive	0.948821
glycerophosphoethanolamine	Direct_bilirubin_umol_L_PGS000681	Under 45	metabolomics	0.201802	0.07497	0.13164	3.79667e+06	2.51388e+06	positive	0.895633
ectoine	Direct_bilirubin_umol_L_PGS000681	Under 45	metabolomics	0.175076	0.0360441	0.922643	-647116	6.66034e+06	negative	0.997218
2-oleoyl-GPE (18:1)*	Direct_bilirubin_umol_L_PGS000681	Under 45	metabolomics	0.148439	0.00837962	0.672341	1.14754e+06	2.7115e+06	positive	0.983384
2-palmitoyl-GPE (16:0)*	Direct_bilirubin_umol_L_PGS000681	Under 45	metabolomics	0.165656	0.0296212	0.643135	916617	1.97706e+06	positive	0.980999
1-arachidonoyl-GPI (20:4)*	Direct_bilirubin_umol_L_PGS000681	Under 45	metabolomics	0.177786	0.0465816	0.886	-228872	1.59553e+06	negative	0.996063
1-palmitoyl-GPI (16:0)	Direct_bilirubin_umol_L_PGS000681	Under 45	metabolomics	0.165114	0.0160271	0.484161	2.33293e+06	3.33158e+06	positive	0.967871
glycolithocholate sulfate*	Direct_bilirubin_umol_L_PGS000681	Under 45	metabolomics	0.159191	0.0250197	0.206078	5.15215e+06	4.06907e+06	positive	0.9235
taurolithocholate 3-sulfate	Direct_bilirubin_umol_L_PGS000681	Under 45	metabolomics	0.184733	0.0509362	0.555083	2.91542e+06	4.93641e+06	positive	0.975033
deoxycarnitine	Direct_bilirubin_umol_L_PGS000681	Under 45	metabolomics	0.141695	0.0047316	0.461027	736597	998421	positive	0.966469
1-ribosyl-imidazoleacetate*	Direct_bilirubin_umol_L_PGS000681	Under 45	metabolomics	0.123424	-0.0144019	0.04905	5.33261e+06	2.70252e+06	positive	0.819262
2-arachidonoyl-GPE (20:4)*	Direct_bilirubin_umol_L_PGS000681	Under 45	metabolomics	0.144952	0.00116645	0.48825	1.34832e+06	1.94375e+06	positive	0.9686
hexanoylglutamine	Direct_bilirubin_umol_L_PGS000681	Under 45	metabolomics	0.130831	-0.00845851	0.5581	-2.37595e+06	4.05392e+06	negative	0.975167
N6-acetyllysine	Direct_bilirubin_umol_L_PGS000681	Under 45	metabolomics	0.176748	0.0464864	0.471457	637935	885175	positive	0.967099
dihomo-linolenate (20:3n3 or n6)	Direct_bilirubin_umol_L_PGS000681	Under 45	metabolomics	0.152553	0.0167444	0.347075	-1.77395e+06	1.88472e+06	negative	0.952437
mannitol/sorbitol	Direct_bilirubin_umol_L_PGS000681	Under 45	metabolomics	0.116107	-0.0240457	0.37797	-1.02315e+07	1.15942e+07	negative	0.95716
tryptophan betaine	Direct_bilirubin_umol_L_PGS000681	Under 45	metabolomics	0.127317	-0.0107654	0.487918	4.39202e+06	6.32704e+06	positive	0.968597
4-vinylphenol sulfate	Direct_bilirubin_umol_L_PGS000681	Under 45	metabolomics	0.156037	0.0210754	0.0785927	-1.93027e+07	1.09503e+07	negative	0.855202
4-ethylphenylsulfate	Direct_bilirubin_umol_L_PGS000681	Under 45	metabolomics	0.139184	0.00152634	0.805055	1.64987e+07	6.68099e+07	positive	0.993066
thymol sulfate	Direct_bilirubin_umol_L_PGS000681	Under 45	metabolomics	0.14482	0.00747802	0.265322	3.13304e+07	2.8093e+07	positive	0.937752
2-linoleoyl-GPE (18:2)*	Direct_bilirubin_umol_L_PGS000681	Under 45	metabolomics	0.13306	-0.00798268	0.243674	2.6528e+06	2.27251e+06	positive	0.932988
1-oleoyl-GPI (18:1)	Direct_bilirubin_umol_L_PGS000681	Under 45	metabolomics	0.188551	0.0573905	0.538248	1.71305e+06	2.78128e+06	positive	0.973795
1-linoleoyl-GPI (18:2)*	Direct_bilirubin_umol_L_PGS000681	Under 45	metabolomics	0.154441	0.0186447	0.602533	1.02032e+06	1.95796e+06	positive	0.978448
dimethylarginine (SDMA + ADMA)	Direct_bilirubin_umol_L_PGS000681	Under 45	metabolomics	0.140697	0.00473112	0.186272	844757	638224	positive	0.915905
N-acetylserine	Direct_bilirubin_umol_L_PGS000681	Under 45	metabolomics	0.130777	-0.00704905	0.260408	1.04538e+06	927760	positive	0.93647
1-stearoyl-2-oleoyl-GPE (18:0/18:1)	Direct_bilirubin_umol_L_PGS000681	Under 45	metabolomics	0.166074	0.0344016	0.0768189	4.97831e+06	2.80736e+06	positive	0.853577
4-allylphenol sulfate	Direct_bilirubin_umol_L_PGS000681	Under 45	metabolomics	0.121724	-0.0169515	0.070476	-2.29261e+07	1.2646e+07	negative	0.847327
1-stearoyl-2-arachidonoyl-GPC (18:0/20:4)	Direct_bilirubin_umol_L_PGS000681	Under 45	metabolomics	0.160635	0.0264085	0.731859	-262375	765260	negative	0.986951
1-palmitoyl-2-linoleoyl-GPE (16:0/18:2)	Direct_bilirubin_umol_L_PGS000681	Under 45	metabolomics	0.122962	-0.0149368	0.08708	5.80711e+06	3.38699e+06	positive	0.861959
sphinganine-1-phosphate	Direct_bilirubin_umol_L_PGS000681	Under 45	metabolomics	0.162927	0.0301984	0.615951	876263	1.74579e+06	positive	0.979699
glycosyl-N-stearoyl-sphingosine (d18:1/18:0)	Direct_bilirubin_umol_L_PGS000681	Under 45	metabolomics	0.158808	0.0254264	0.418636	-1.05685e+06	1.30556e+06	negative	0.961289
succinylcarnitine (C4-DC)	Direct_bilirubin_umol_L_PGS000681	Under 45	metabolomics	0.117065	-0.0232323	0.466174	1.05147e+06	1.44173e+06	positive	0.966764
bilirubin (E,E)*	Direct_bilirubin_umol_L_PGS000681	Under 45	metabolomics	0.221575	0.0984062	2.32334e-13	2.48456e+07	3.29277e+06	positive	1.409e-09
bilirubin (E,Z or Z,E)*	Direct_bilirubin_umol_L_PGS000681	Under 45	metabolomics	0.235193	0.113666	2.16269e-15	1.83312e+07	2.23333e+06	positive	1.40994e-11
N-methylproline	Direct_bilirubin_umol_L_PGS000681	Under 45	metabolomics	0.170061	0.0373411	0.622025	-6.19727e+06	1.25627e+07	negative	0.97996
beta-cryptoxanthin	Direct_bilirubin_umol_L_PGS000681	Under 45	metabolomics	0.158366	0.0226187	0.36373	-4.0937e+06	4.50266e+06	negative	0.954443
5alpha-androstan-3beta,17beta-diol disulfate	Direct_bilirubin_umol_L_PGS000681	Under 45	metabolomics	0.150109	0.0161972	0.441371	4.56813e+06	5.9286e+06	positive	0.964384
5alpha-pregnan-3beta,20alpha-diol disulfate	Direct_bilirubin_umol_L_PGS000681	Under 45	metabolomics	0.134272	-0.00242239	0.113323	-5.31626e+07	3.35123e+07	negative	0.884557
glycocholenate sulfate*	Direct_bilirubin_umol_L_PGS000681	Under 45	metabolomics	0.119286	-0.0200679	0.439185	1.73844e+06	2.2454e+06	positive	0.964176
taurocholenate sulfate*	Direct_bilirubin_umol_L_PGS000681	Under 45	metabolomics	0.137082	-0.000911342	0.823563	967026	4.33469e+06	positive	0.993157
androstenediol (3beta,17beta) disulfate (1)	Direct_bilirubin_umol_L_PGS000681	Under 45	metabolomics	0.159254	0.0262248	0.807537	1.26884e+06	5.20569e+06	positive	0.993085
pregnenediol disulfate (C21H34O8S2)*	Direct_bilirubin_umol_L_PGS000681	Under 45	metabolomics	0.148461	0.0145711	0.157212	6.62992e+06	4.6797e+06	positive	0.906152
androstenediol (3beta,17beta) disulfate (2)	Direct_bilirubin_umol_L_PGS000681	Under 45	metabolomics	0.145684	0.0105072	0.02054	5.65626e+06	2.43371e+06	positive	0.728036
21-hydroxypregnenolone disulfate	Direct_bilirubin_umol_L_PGS000681	Under 45	metabolomics	0.135707	-0.00221201	0.0746807	5.09225e+06	2.85058e+06	positive	0.851656
5alpha-pregnan-3beta,20beta-diol monosulfate (1)	Direct_bilirubin_umol_L_PGS000681	Under 45	metabolomics	0.115715	-0.0239085	0.275207	-3.67891e+07	3.3677e+07	negative	0.939429
5alpha-pregnan-3beta,20alpha-diol monosulfate (2)	Direct_bilirubin_umol_L_PGS000681	Under 45	metabolomics	0.120517	-0.0177663	0.144597	-6.60957e+07	4.52314e+07	negative	0.901465
5alpha-androstan-3alpha,17beta-diol monosulfate (1)	Direct_bilirubin_umol_L_PGS000681	Under 45	metabolomics	0.130892	-0.00868611	0.856518	939504	5.19326e+06	positive	0.994977
5alpha-androstan-3beta,17beta-diol monosulfate (2)	Direct_bilirubin_umol_L_PGS000681	Under 45	metabolomics	0.13588	-0.00846095	0.827068	-966768	4.42272e+06	negative	0.993238
androstenediol (3alpha, 17alpha) monosulfate (2)	Direct_bilirubin_umol_L_PGS000681	Under 45	metabolomics	0.187233	0.0569815	0.0213535	7.48455e+06	3.24085e+06	positive	0.73083
androstenediol (3alpha, 17alpha) monosulfate (3)	Direct_bilirubin_umol_L_PGS000681	Under 45	metabolomics	0.130214	-0.00625916	0.553449	2.39878e+06	4.04504e+06	positive	0.974919
androstenediol (3beta,17beta) monosulfate (1)	Direct_bilirubin_umol_L_PGS000681	Under 45	metabolomics	0.177645	0.0475254	0.326503	3.69901e+06	3.76605e+06	positive	0.948745
androstenediol (3beta,17beta) monosulfate (2)	Direct_bilirubin_umol_L_PGS000681	Under 45	metabolomics	0.199697	0.0581338	0.137076	-6.65802e+06	4.4697e+06	negative	0.898149
1-docosahexaenoyl-GPE (22:6)*	Direct_bilirubin_umol_L_PGS000681	Under 45	metabolomics	0.159393	0.0261048	0.300631	1.39288e+06	1.3442e+06	positive	0.944155
1-docosapentaenoyl-GPC (22:5n3)*	Direct_bilirubin_umol_L_PGS000681	Under 45	metabolomics	0.175235	0.0447339	0.246445	-1.97117e+06	1.69861e+06	negative	0.933701
pregnenediol sulfate (C21H34O5S)*	Direct_bilirubin_umol_L_PGS000681	Under 45	metabolomics	0.178613	0.0486465	0.0919272	5.64097e+06	3.34035e+06	positive	0.866553
2-hydroxyglutarate	Direct_bilirubin_umol_L_PGS000681	Under 45	metabolomics	0.151382	0.0139172	0.415385	1.51506e+06	1.85854e+06	positive	0.96085
gamma-CEHC	Direct_bilirubin_umol_L_PGS000681	Under 45	metabolomics	0.147173	0.012516	0.422721	2.27728e+06	2.83808e+06	positive	0.961687
N-acetyl-beta-alanine	Direct_bilirubin_umol_L_PGS000681	Under 45	metabolomics	0.119298	-0.0188874	0.675591	528789	1.2628e+06	positive	0.983619
sphingomyelin (d18:1/18:1, d18:2/18:0)	Direct_bilirubin_umol_L_PGS000681	Under 45	metabolomics	0.162435	0.0284959	0.562131	-572877	987562	negative	0.97539
palmitoyl sphingomyelin (d18:1/16:0)	Direct_bilirubin_umol_L_PGS000681	Under 45	metabolomics	0.202216	0.0765148	0.133115	-853391	567224	negative	0.89616
3-hydroxyhippurate	Direct_bilirubin_umol_L_PGS000681	Under 45	metabolomics	0.127058	-0.0131358	0.899092	1.27318e+06	1.00347e+07	positive	0.996469
16a-hydroxy DHEA 3-sulfate	Direct_bilirubin_umol_L_PGS000681	Under 45	metabolomics	0.123623	-0.0147528	0.231473	7.81416e+06	6.52209e+06	positive	0.931505
pregnenolone sulfate	Direct_bilirubin_umol_L_PGS000681	Under 45	metabolomics	0.143703	0.00934721	0.0815442	7.42548e+06	4.25412e+06	positive	0.857075
andro steroid monosulfate C19H28O6S (1)*	Direct_bilirubin_umol_L_PGS000681	Under 45	metabolomics	0.132533	-0.00589208	0.136377	7.54465e+06	5.05683e+06	positive	0.898149
ergothioneine	Direct_bilirubin_umol_L_PGS000681	Under 45	metabolomics	0.126344	-0.0133659	0.769261	-1.16513e+06	3.96963e+06	negative	0.98986
1-pentadecanoyl-GPC (15:0)*	Direct_bilirubin_umol_L_PGS000681	Under 45	metabolomics	0.15406	0.0184921	0.965853	-79904.3	1.86549e+06	negative	0.999295
13-HODE + 9-HODE	Direct_bilirubin_umol_L_PGS000681	Under 45	metabolomics	0.13087	-0.00752698	0.0974408	8.15367e+06	4.9098e+06	positive	0.871891
tridecenedioate (C13:1-DC)*	Direct_bilirubin_umol_L_PGS000681	Under 45	metabolomics	0.128606	-0.00898237	0.598609	1.39695e+06	2.65199e+06	positive	0.977949
4-cholesten-3-one	Direct_bilirubin_umol_L_PGS000681	Under 45	metabolomics	0.171226	0.0263349	0.0700417	2.83949e+06	1.56344e+06	positive	0.846146
cinnamoylglycine	Direct_bilirubin_umol_L_PGS000681	Under 45	metabolomics	0.176039	0.0346271	0.518174	-3.64316e+06	5.63358e+06	negative	0.971394
cis-4-decenoylcarnitine (C10:1)	Direct_bilirubin_umol_L_PGS000681	Under 45	metabolomics	0.123614	-0.0150551	0.6674	-1.26336e+06	2.93813e+06	negative	0.982945
(16 or 17)-methylstearate (a19:0 or i19:0)	Direct_bilirubin_umol_L_PGS000681	Under 45	metabolomics	0.135439	-0.00281653	0.41001	-1.8168e+06	2.20321e+06	negative	0.960701
2,3-dihydroxyisovalerate	Direct_bilirubin_umol_L_PGS000681	Under 45	metabolomics	0.124952	-0.0266156	0.938435	1.57685e+06	2.04037e+07	positive	0.998426
3-methylglutaconate	Direct_bilirubin_umol_L_PGS000681	Under 45	metabolomics	0.15824	0.0179472	0.117177	4.04087e+06	2.57422e+06	positive	0.88663
isoursodeoxycholate	Direct_bilirubin_umol_L_PGS000681	Under 45	metabolomics	0.162395	0.028164	0.477845	1.11784e+07	1.57366e+07	positive	0.967301
hydantoin-5-propionate	Direct_bilirubin_umol_L_PGS000681	Under 45	metabolomics	0.155094	0.0145883	0.468718	-1.78115e+06	2.45615e+06	negative	0.966764
sulfate*	Direct_bilirubin_umol_L_PGS000681	Under 45	metabolomics	0.19734	0.069528	0.71828	249445	691031	positive	0.986213
4-hydroxy-2-oxoglutaric acid	Direct_bilirubin_umol_L_PGS000681	Under 45	metabolomics	0.198031	0.0613314	0.719298	-863220	2.40032e+06	negative	0.986224
S-methylcysteine	Direct_bilirubin_umol_L_PGS000681	Under 45	metabolomics	0.171458	0.0392434	0.0470473	-7.23892e+06	3.63562e+06	negative	0.815771
androsterone glucuronide	Direct_bilirubin_umol_L_PGS000681	Under 45	metabolomics	0.16646	0.0323068	0.165449	6.37667e+06	4.59032e+06	positive	0.908768
argininate*	Direct_bilirubin_umol_L_PGS000681	Under 45	metabolomics	0.151677	0.0163057	0.72949	944099	2.72853e+06	positive	0.986784
2-oxoarginine*	Direct_bilirubin_umol_L_PGS000681	Under 45	metabolomics	0.124342	-0.0193653	0.622951	-1.76628e+06	3.58996e+06	negative	0.97996
cis-4-decenoate (10:1n6)*	Direct_bilirubin_umol_L_PGS000681	Under 45	metabolomics	0.117381	-0.0216869	0.334159	-3.83738e+06	3.96936e+06	negative	0.949654
1-adrenoyl-GPC (22:4)*	Direct_bilirubin_umol_L_PGS000681	Under 45	metabolomics	0.18505	0.053606	0.965014	-90331.2	2.05828e+06	negative	0.999247
1-(1-enyl-palmitoyl)-GPC (P-16:0)*	Direct_bilirubin_umol_L_PGS000681	Under 45	metabolomics	0.16455	0.0312341	0.857199	-410565	2.28042e+06	negative	0.99502
1-(1-enyl-oleoyl)-GPC (P-18:1)*	Direct_bilirubin_umol_L_PGS000681	Under 45	metabolomics	0.199754	0.0591961	0.535556	-1.49708e+06	2.41446e+06	negative	0.973338
1-methyl-5-imidazoleacetate	Direct_bilirubin_umol_L_PGS000681	Under 45	metabolomics	0.174116	0.0434381	0.0620471	8.0464e+06	4.30201e+06	positive	0.8367
glycoursodeoxycholate	Direct_bilirubin_umol_L_PGS000681	Under 45	metabolomics	0.15402	0.0198793	0.582802	7.76331e+06	1.41235e+07	positive	0.976861
S-methylcysteine sulfoxide	Direct_bilirubin_umol_L_PGS000681	Under 45	metabolomics	0.188434	0.0575359	0.0380183	-1.36838e+07	6.57688e+06	negative	0.792111
eicosanedioate (C20-DC)	Direct_bilirubin_umol_L_PGS000681	Under 45	metabolomics	0.137032	-0.00185733	0.404872	2.39179e+06	2.86886e+06	positive	0.960035
docosadioate (C22-DC)	Direct_bilirubin_umol_L_PGS000681	Under 45	metabolomics	0.163899	0.0299089	0.951626	-246363	4.05887e+06	negative	0.998914
16-hydroxypalmitate	Direct_bilirubin_umol_L_PGS000681	Under 45	metabolomics	0.118781	-0.0200663	0.546244	2.7449e+06	4.54582e+06	positive	0.974428
oleoyl-linoleoyl-glycerol (18:1/18:2) [1]	Direct_bilirubin_umol_L_PGS000681	Under 45	metabolomics	0.146866	0.0113046	0.0297088	5.19848e+06	2.38401e+06	positive	0.767521
oleoyl-linoleoyl-glycerol (18:1/18:2) [2]	Direct_bilirubin_umol_L_PGS000681	Under 45	metabolomics	0.131793	-0.00587222	0.0207046	5.99615e+06	2.5833e+06	positive	0.728036
1-(1-enyl-palmitoyl)-GPE (P-16:0)*	Direct_bilirubin_umol_L_PGS000681	Under 45	metabolomics	0.150675	0.0157182	0.177235	3.53525e+06	2.61611e+06	positive	0.91219
1-(1-enyl-stearoyl)-GPE (P-18:0)*	Direct_bilirubin_umol_L_PGS000681	Under 45	metabolomics	0.131949	-0.00540035	0.61299	1.40758e+06	2.78098e+06	positive	0.979388
linoleoylcarnitine (C18:2)*	Direct_bilirubin_umol_L_PGS000681	Under 45	metabolomics	0.127753	-0.0111404	0.670675	785671	1.84652e+06	positive	0.983226
carboxyethyl-GABA	Direct_bilirubin_umol_L_PGS000681	Under 45	metabolomics	0.135967	-0.00429825	0.263964	1.49249e+06	1.33445e+06	positive	0.937312
beta-citrylglutamate	Direct_bilirubin_umol_L_PGS000681	Under 45	metabolomics	0.106958	-0.0355483	0.31621	1.83701e+06	1.83088e+06	positive	0.947396
trimethylamine N-oxide	Direct_bilirubin_umol_L_PGS000681	Under 45	metabolomics	0.155531	0.0219126	0.612181	-2.41624e+06	4.76294e+06	negative	0.979388
imidazole propionate	Direct_bilirubin_umol_L_PGS000681	Under 45	metabolomics	0.134109	-0.0070694	0.70669	2.36657e+06	6.28506e+06	positive	0.98532
pregnanediol-3-glucuronide	Direct_bilirubin_umol_L_PGS000681	Under 45	metabolomics	0.116267	-0.0244554	0.393319	-1.51514e+07	1.77334e+07	negative	0.958992
phenylalanyltryptophan	Direct_bilirubin_umol_L_PGS000681	Under 45	metabolomics	0.105362	-0.0389342	0.211763	1.78018e+06	1.42363e+06	positive	0.925358
N-palmitoylglycine	Direct_bilirubin_umol_L_PGS000681	Under 45	metabolomics	0.134185	-0.00310115	0.944631	100006	1.43918e+06	positive	0.998816
succinimide	Direct_bilirubin_umol_L_PGS000681	Under 45	metabolomics	0.240763	0.115338	1.33807e-17	1.80017e+07	2.02258e+06	positive	1.02628e-13
2-stearoyl-GPE (18:0)*	Direct_bilirubin_umol_L_PGS000681	Under 45	metabolomics	0.176638	0.0466329	0.266968	2.25536e+06	2.02934e+06	positive	0.93817
(R)-3-hydroxybutyrylcarnitine	Direct_bilirubin_umol_L_PGS000681	Under 45	metabolomics	0.151359	0.0111648	0.662123	-2.50254e+06	5.7231e+06	negative	0.982444
N-acetylcarnosine	Direct_bilirubin_umol_L_PGS000681	Under 45	metabolomics	0.124622	-0.0159633	0.0568846	5.60963e+06	2.93863e+06	positive	0.829807
margaroylcarnitine (C17)*	Direct_bilirubin_umol_L_PGS000681	Under 45	metabolomics	0.132493	-0.00623433	0.976172	-51690.7	1.72971e+06	negative	0.999565
2-hydroxydecanoate	Direct_bilirubin_umol_L_PGS000681	Under 45	metabolomics	0.178627	0.0478357	0.907377	-383436	3.29385e+06	negative	0.996707
4-methylcatechol sulfate	Direct_bilirubin_umol_L_PGS000681	Under 45	metabolomics	0.131886	-0.00489703	0.169876	8.7362e+06	6.35506e+06	positive	0.91068
3-methyl catechol sulfate (1)	Direct_bilirubin_umol_L_PGS000681	Under 45	metabolomics	0.135655	-0.00776565	0.128027	-1.55205e+07	1.01792e+07	negative	0.89255
guaiacol sulfate	Direct_bilirubin_umol_L_PGS000681	Under 45	metabolomics	0.168269	0.0366661	0.682647	-1.57667e+06	3.85394e+06	negative	0.984031
2-aminooctanoate	Direct_bilirubin_umol_L_PGS000681	Under 45	metabolomics	0.128917	-0.0109784	0.577702	1.37662e+06	2.47089e+06	positive	0.976621
2-piperidinone	Direct_bilirubin_umol_L_PGS000681	Under 45	metabolomics	0.173574	0.0388307	0.277696	1.11337e+07	1.02445e+07	positive	0.940248
N-acetyl-1-methylhistidine*	Direct_bilirubin_umol_L_PGS000681	Under 45	metabolomics	0.160715	0.0104848	0.408745	2.72822e+06	3.2992e+06	positive	0.960701
2-aminophenol sulfate	Direct_bilirubin_umol_L_PGS000681	Under 45	metabolomics	0.16888	0.034539	0.37922	-7.90818e+06	8.98478e+06	negative	0.957287
sphingomyelin (d18:1/14:0, d16:1/16:0)*	Direct_bilirubin_umol_L_PGS000681	Under 45	metabolomics	0.151785	0.0161426	0.481162	-686093	973185	negative	0.967565
sphingomyelin (d18:2/16:0, d18:1/16:1)*	Direct_bilirubin_umol_L_PGS000681	Under 45	metabolomics	0.181356	0.0509985	0.909818	84489.9	745525	positive	0.996787
6-oxopiperidine-2-carboxylate	Direct_bilirubin_umol_L_PGS000681	Under 45	metabolomics	0.145872	0.00928431	0.863238	-282009	1.63627e+06	negative	0.995168
S-allylcysteine	Direct_bilirubin_umol_L_PGS000681	Under 45	metabolomics	0.121401	-0.0218493	0.251469	-1.18379e+07	1.03097e+07	negative	0.935099
N-delta-acetylornithine	Direct_bilirubin_umol_L_PGS000681	Under 45	metabolomics	0.154926	0.021212	0.205804	-5.27848e+06	4.16637e+06	negative	0.923474
acisoga	Direct_bilirubin_umol_L_PGS000681	Under 45	metabolomics	0.164141	0.0290351	0.507964	1.48931e+06	2.24793e+06	positive	0.971112
2-aminoheptanoate	Direct_bilirubin_umol_L_PGS000681	Under 45	metabolomics	0.202314	0.0752939	0.12135	3.42055e+06	2.20405e+06	positive	0.888443
1-eicosapentaenoyl-GPE (20:5)*	Direct_bilirubin_umol_L_PGS000681	Under 45	metabolomics	0.158558	0.0213658	0.888731	-393239	2.80909e+06	negative	0.99612
N2,N5-diacetylornithine	Direct_bilirubin_umol_L_PGS000681	Under 45	metabolomics	0.161954	0.0225897	0.315884	-4.30208e+06	4.28465e+06	negative	0.94737
methionine sulfone	Direct_bilirubin_umol_L_PGS000681	Under 45	metabolomics	0.137496	0.0018821	0.597469	-1.61045e+06	3.0478e+06	negative	0.977949
1-linolenoyl-GPC (18:3)*	Direct_bilirubin_umol_L_PGS000681	Under 45	metabolomics	0.161015	0.0290986	0.394877	1.91787e+06	2.25215e+06	positive	0.959128
1-eicosapentaenoyl-GPC (20:5)*	Direct_bilirubin_umol_L_PGS000681	Under 45	metabolomics	0.117756	-0.022135	0.252001	-3.54159e+06	3.08796e+06	negative	0.935132
1-eicosenoyl-GPC (20:1)*	Direct_bilirubin_umol_L_PGS000681	Under 45	metabolomics	0.136997	0.00158849	0.5539	-1.25978e+06	2.12677e+06	negative	0.974957
1-dihomo-linolenoyl-GPE (20:3n3 or 6)*	Direct_bilirubin_umol_L_PGS000681	Under 45	metabolomics	0.149748	0.0089776	0.172679	3.09106e+06	2.26318e+06	positive	0.912076
1-(1-enyl-oleoyl)-GPE (P-18:1)*	Direct_bilirubin_umol_L_PGS000681	Under 45	metabolomics	0.127549	-0.0125666	0.20134	4.18414e+06	3.27001e+06	positive	0.921621
O-sulfo-L-tyrosine	Direct_bilirubin_umol_L_PGS000681	Under 45	metabolomics	0.155625	0.0217388	0.240328	1.31172e+06	1.11575e+06	positive	0.932456
etiocholanolone glucuronide	Direct_bilirubin_umol_L_PGS000681	Under 45	metabolomics	0.134394	-0.0055204	0.991568	52806.3	4.99403e+06	positive	0.999769
N-acetyltaurine	Direct_bilirubin_umol_L_PGS000681	Under 45	metabolomics	0.115536	-0.0253022	0.257237	2.12406e+06	1.87254e+06	positive	0.936289
1-docosapentaenoyl-GPC (22:5n6)*	Direct_bilirubin_umol_L_PGS000681	Under 45	metabolomics	0.192399	0.0624198	0.561045	1.66207e+06	2.85723e+06	positive	0.975318
1-linolenoyl-GPE (18:3)*	Direct_bilirubin_umol_L_PGS000681	Under 45	metabolomics	0.16826	0.0258383	0.194256	4.52742e+06	3.48241e+06	positive	0.918621
9-hydroxystearate	Direct_bilirubin_umol_L_PGS000681	Under 45	metabolomics	0.126658	-0.0151187	0.65353	-1.37797e+06	3.0679e+06	negative	0.981655
3-methylglutarylcarnitine (2)	Direct_bilirubin_umol_L_PGS000681	Under 45	metabolomics	0.170698	0.0377965	0.929542	-313097	3.53906e+06	negative	0.997794
methyl glucopyranoside (alpha + beta)	Direct_bilirubin_umol_L_PGS000681	Under 45	metabolomics	0.174644	0.0400755	0.630194	5.392e+06	1.11919e+07	positive	0.980179
sphingomyelin (d18:2/14:0, d18:1/14:1)*	Direct_bilirubin_umol_L_PGS000681	Under 45	metabolomics	0.179903	0.0495913	0.266413	1.65042e+06	1.48328e+06	positive	0.93817
sphingomyelin (d18:1/24:1, d18:2/24:0)*	Direct_bilirubin_umol_L_PGS000681	Under 45	metabolomics	0.204405	0.0785199	0.265758	-1.08515e+06	973931	negative	0.937752
octadecenedioylcarnitine (C18:1-DC)*	Direct_bilirubin_umol_L_PGS000681	Under 45	metabolomics	0.144493	0.00884209	0.0943726	4.24385e+06	2.53193e+06	positive	0.869254
myristoleoylcarnitine (C14:1)*	Direct_bilirubin_umol_L_PGS000681	Under 45	metabolomics	0.138101	0.00056438	0.869919	-475621	2.90276e+06	negative	0.995307
N-formylphenylalanine	Direct_bilirubin_umol_L_PGS000681	Under 45	metabolomics	0.166963	0.0284318	0.385223	1.70755e+06	1.9646e+06	positive	0.957872
cyclo(pro-val)	Direct_bilirubin_umol_L_PGS000681	Under 45	metabolomics	0.148346	0.0130197	0.0607173	-4.94525e+06	2.63039e+06	negative	0.834798
4-hydroxychlorothalonil	Direct_bilirubin_umol_L_PGS000681	Under 45	metabolomics	0.136168	-0.000514555	0.190037	-2.75252e+06	2.0974e+06	negative	0.917462
tyramine O-sulfate	Direct_bilirubin_umol_L_PGS000681	Under 45	metabolomics	0.144699	-0.00413583	0.111128	3.60812e+07	2.26013e+07	positive	0.882924
3-hydroxypyridine sulfate	Direct_bilirubin_umol_L_PGS000681	Under 45	metabolomics	0.149709	0.0131525	0.101908	-2.20839e+07	1.34749e+07	negative	0.87502
arabonate/xylonate	Direct_bilirubin_umol_L_PGS000681	Under 45	metabolomics	0.189679	0.0625364	0.817827	362438	1.57262e+06	positive	0.993085
methyl-4-hydroxybenzoate sulfate	Direct_bilirubin_umol_L_PGS000681	Under 45	metabolomics	0.1329	-0.0072568	0.515866	1.90529e+07	2.93018e+07	positive	0.971394
vanillactate	Direct_bilirubin_umol_L_PGS000681	Under 45	metabolomics	0.16309	0.0122046	0.789684	1.49113e+06	5.58701e+06	positive	0.992319
p-cresol glucuronide*	Direct_bilirubin_umol_L_PGS000681	Under 45	metabolomics	0.208566	0.0754771	0.00149694	2.03788e+07	6.37811e+06	positive	0.395952
6-hydroxyindole sulfate	Direct_bilirubin_umol_L_PGS000681	Under 45	metabolomics	0.130794	-0.00616108	0.170736	3.41011e+06	2.48565e+06	positive	0.911125
sphingomyelin (d18:1/20:0, d16:1/22:0)*	Direct_bilirubin_umol_L_PGS000681	Under 45	metabolomics	0.163632	0.0307347	0.283242	-884245	823097	negative	0.941407
sphingomyelin (d18:1/20:1, d18:2/20:0)*	Direct_bilirubin_umol_L_PGS000681	Under 45	metabolomics	0.173062	0.0422178	0.155969	-1.20723e+06	849552	negative	0.905641
sphingomyelin (d18:1/20:2, d18:2/20:1, d16:1/22:2)*	Direct_bilirubin_umol_L_PGS000681	Under 45	metabolomics	0.134384	-0.00258078	0.435458	1.22638e+06	1.57118e+06	positive	0.963335
behenoyl sphingomyelin (d18:1/22:0)*	Direct_bilirubin_umol_L_PGS000681	Under 45	metabolomics	0.167332	0.0358575	0.44355	-649052	846385	negative	0.964485
sphingomyelin (d18:1/22:1, d18:2/22:0, d16:1/24:1)*	Direct_bilirubin_umol_L_PGS000681	Under 45	metabolomics	0.149092	0.0144547	0.342559	-687599	723733	negative	0.951538
sphingomyelin (d18:1/22:2, d18:2/22:1, d16:1/24:2)*	Direct_bilirubin_umol_L_PGS000681	Under 45	metabolomics	0.137294	0.000789505	0.911063	-127920	1.14462e+06	negative	0.996787
lignoceroyl sphingomyelin (d18:1/24:0)	Direct_bilirubin_umol_L_PGS000681	Under 45	metabolomics	0.19158	0.0628508	0.511268	-792090	1.20495e+06	negative	0.971394
sphingomyelin (d17:1/16:0, d18:1/15:0, d16:1/17:0)*	Direct_bilirubin_umol_L_PGS000681	Under 45	metabolomics	0.176415	0.046375	0.257232	-1.19199e+06	1.05084e+06	negative	0.936289
dopamine 3-O-sulfate	Direct_bilirubin_umol_L_PGS000681	Under 45	metabolomics	0.135216	-0.00132907	0.181816	6.31404e+06	4.72205e+06	positive	0.914179
3-hydroxyhexanoate	Direct_bilirubin_umol_L_PGS000681	Under 45	metabolomics	0.0969255	-0.0453657	0.456752	-1.46305e+06	1.96432e+06	negative	0.965888
3beta-hydroxy-5-cholestenoate	Direct_bilirubin_umol_L_PGS000681	Under 45	metabolomics	0.167773	0.0360913	0.379487	-1.51865e+06	1.7264e+06	negative	0.957327
C-glycosyltryptophan	Direct_bilirubin_umol_L_PGS000681	Under 45	metabolomics	0.105685	-0.0370249	0.939353	88391.4	1.16116e+06	positive	0.998426
arabitol/xylitol	Direct_bilirubin_umol_L_PGS000681	Under 45	metabolomics	0.15168	0.0171679	0.180879	1.57149e+06	1.17273e+06	positive	0.914179
N-acetylglucosamine/N-acetylgalactosamine	Direct_bilirubin_umol_L_PGS000681	Under 45	metabolomics	0.116883	-0.02648	0.200886	1.81383e+06	1.4161e+06	positive	0.921601
adipoylcarnitine (C6-DC)	Direct_bilirubin_umol_L_PGS000681	Under 45	metabolomics	0.146974	0.0117162	0.105922	3.87795e+06	2.39396e+06	positive	0.878273
nonanoylcarnitine (C9)	Direct_bilirubin_umol_L_PGS000681	Under 45	metabolomics	0.161991	0.0207532	0.23735	-6.86808e+06	5.80452e+06	negative	0.932219
glycochenodeoxycholate 3-sulfate	Direct_bilirubin_umol_L_PGS000681	Under 45	metabolomics	0.1009	-0.0466553	0.335521	5.52389e+06	5.72977e+06	positive	0.949939
glycodeoxycholate 3-sulfate	Direct_bilirubin_umol_L_PGS000681	Under 45	metabolomics	0.132319	-0.00915059	0.5242	4.07102e+06	6.3872e+06	positive	0.971864
1,2-dilinoleoyl-GPC (18:2/18:2)	Direct_bilirubin_umol_L_PGS000681	Under 45	metabolomics	0.162223	0.029383	0.411162	1.21319e+06	1.47487e+06	positive	0.960701
1-stearoyl-2-oleoyl-GPC (18:0/18:1)	Direct_bilirubin_umol_L_PGS000681	Under 45	metabolomics	0.156588	0.0217143	0.83001	-213627	994503	negative	0.993466
1-palmitoyl-2-arachidonoyl-GPC (16:0/20:4n6)	Direct_bilirubin_umol_L_PGS000681	Under 45	metabolomics	0.160901	0.0284117	0.92413	79389.2	833185	positive	0.99732
1-palmitoyl-2-docosahexaenoyl-GPC (16:0/22:6)	Direct_bilirubin_umol_L_PGS000681	Under 45	metabolomics	0.129553	-0.00788596	0.550988	-566104	948715	negative	0.97451
1-stearoyl-2-docosahexaenoyl-GPC (18:0/22:6)	Direct_bilirubin_umol_L_PGS000681	Under 45	metabolomics	0.134658	-0.00372308	0.527316	-763329	1.20669e+06	negative	0.972417
1-(1-enyl-stearoyl)-2-oleoyl-GPC (P-18:0/18:1)	Direct_bilirubin_umol_L_PGS000681	Under 45	metabolomics	0.211788	0.08601	0.222153	-2.5379e+06	2.07609e+06	negative	0.928393
1-(1-enyl-stearoyl)-2-arachidonoyl-GPC (P-18:0/20:4)	Direct_bilirubin_umol_L_PGS000681	Under 45	metabolomics	0.15016	0.0156915	0.932457	-168970	1.99259e+06	negative	0.998183
1-(1-enyl-stearoyl)-2-oleoyl-GPE (P-18:0/18:1)	Direct_bilirubin_umol_L_PGS000681	Under 45	metabolomics	0.152706	0.0180729	0.0875974	3.82067e+06	2.23201e+06	positive	0.862465
sphingomyelin (d18:1/17:0, d17:1/18:0, d19:1/16:0)	Direct_bilirubin_umol_L_PGS000681	Under 45	metabolomics	0.175788	0.0453743	0.490337	-735871	1.066e+06	negative	0.968751
1-palmitoyl-2-stearoyl-GPC (16:0/18:0)	Direct_bilirubin_umol_L_PGS000681	Under 45	metabolomics	0.158458	0.0241695	0.288839	972799	916117	positive	0.942413
2-hydroxybutyrate/2-hydroxyisobutyrate	Direct_bilirubin_umol_L_PGS000681	Under 45	metabolomics	0.144005	0.00827633	0.391871	-1.94978e+06	2.27509e+06	negative	0.958937
oleate/vaccenate (18:1)	Direct_bilirubin_umol_L_PGS000681	Under 45	metabolomics	0.0992247	-0.0424066	0.328287	-1.65191e+06	1.68808e+06	negative	0.948821
isoleucylleucine/leucylisoleucine	Direct_bilirubin_umol_L_PGS000681	Under 45	metabolomics	0.162266	0.022953	0.742325	-948030	2.88174e+06	negative	0.9878
palmitoyl dihydrosphingomyelin (d18:0/16:0)*	Direct_bilirubin_umol_L_PGS000681	Under 45	metabolomics	0.201879	0.0750592	0.784944	259477	950333	positive	0.991741
tricosanoyl sphingomyelin (d18:1/23:0)*	Direct_bilirubin_umol_L_PGS000681	Under 45	metabolomics	0.199967	0.0733795	0.261579	-1.33049e+06	1.1837e+06	negative	0.936664
sphingomyelin (d18:2/23:0, d18:1/23:1, d17:1/24:1)*	Direct_bilirubin_umol_L_PGS000681	Under 45	metabolomics	0.187818	0.0595792	0.274712	-1.39156e+06	1.27253e+06	negative	0.939326
sphingomyelin (d18:2/24:1, d18:1/24:2)*	Direct_bilirubin_umol_L_PGS000681	Under 45	metabolomics	0.1892	0.0617157	0.520229	-539300	838113	negative	0.971473
1-stearoyl-2-linoleoyl-GPE (18:0/18:2)*	Direct_bilirubin_umol_L_PGS000681	Under 45	metabolomics	0.131006	-0.00562812	0.0546498	4.75963e+06	2.47076e+06	positive	0.826633
1-stearoyl-2-arachidonoyl-GPE (18:0/20:4)	Direct_bilirubin_umol_L_PGS000681	Under 45	metabolomics	0.155475	0.0229656	0.262278	1.99886e+06	1.78097e+06	positive	0.936773
1-stearoyl-2-linoleoyl-GPC (18:0/18:2)*	Direct_bilirubin_umol_L_PGS000681	Under 45	metabolomics	0.154389	0.021152	0.818296	142574	620253	positive	0.993085
1-palmitoyl-2-palmitoleoyl-GPC (16:0/16:1)*	Direct_bilirubin_umol_L_PGS000681	Under 45	metabolomics	0.104863	-0.0361779	0.326887	2.27617e+06	2.31927e+06	positive	0.948821
1-palmitoyl-2-eicosapentaenoyl-GPC (16:0/20:5)*	Direct_bilirubin_umol_L_PGS000681	Under 45	metabolomics	0.136611	0.000573159	0.769232	-496131	1.69012e+06	negative	0.98986
1-palmitoyl-2-arachidonoyl-GPE (16:0/20:4)*	Direct_bilirubin_umol_L_PGS000681	Under 45	metabolomics	0.137158	0.000343992	0.305234	2.52753e+06	2.46255e+06	positive	0.945403
1-palmitoyl-2-docosahexaenoyl-GPE (16:0/22:6)*	Direct_bilirubin_umol_L_PGS000681	Under 45	metabolomics	0.134479	-0.00247022	0.307141	2.95361e+06	2.88907e+06	positive	0.945716
1-stearoyl-2-docosahexaenoyl-GPE (18:0/22:6)*	Direct_bilirubin_umol_L_PGS000681	Under 45	metabolomics	0.123011	-0.0160463	0.331126	2.15511e+06	2.21526e+06	positive	0.949137
1-palmitoyl-2-arachidonoyl-GPI (16:0/20:4)*	Direct_bilirubin_umol_L_PGS000681	Under 45	metabolomics	0.133794	-0.00297523	0.172612	2.928e+06	2.14362e+06	positive	0.912076
1-stearoyl-2-linoleoyl-GPI (18:0/18:2)	Direct_bilirubin_umol_L_PGS000681	Under 45	metabolomics	0.145002	0.00798345	0.647662	749547	1.63904e+06	positive	0.98141
gamma-tocopherol/beta-tocopherol	Direct_bilirubin_umol_L_PGS000681	Under 45	metabolomics	0.140869	0.00493006	0.770433	-638044	2.18527e+06	negative	0.989988
1-(1-enyl-stearoyl)-2-arachidonoyl-GPE (P-18:0/20:4)*	Direct_bilirubin_umol_L_PGS000681	Under 45	metabolomics	0.161151	0.0295322	0.245527	2.24949e+06	1.93469e+06	positive	0.933436
1-(1-enyl-palmitoyl)-2-docosahexaenoyl-GPE (P-16:0/22:6)*	Direct_bilirubin_umol_L_PGS000681	Under 45	metabolomics	0.139778	0.00480572	0.827393	328703	1.50667e+06	positive	0.99324
1-(1-enyl-palmitoyl)-2-arachidonoyl-GPE (P-16:0/20:4)*	Direct_bilirubin_umol_L_PGS000681	Under 45	metabolomics	0.141771	0.00540002	0.143987	2.93682e+06	2.00667e+06	positive	0.901465
1-(1-enyl-stearoyl)-2-docosahexaenoyl-GPE (P-18:0/22:6)*	Direct_bilirubin_umol_L_PGS000681	Under 45	metabolomics	0.150879	0.0156692	0.639402	920632	1.96364e+06	positive	0.98044
1-(1-enyl-palmitoyl)-2-oleoyl-GPE (P-16:0/18:1)*	Direct_bilirubin_umol_L_PGS000681	Under 45	metabolomics	0.161466	0.0290659	0.413558	1.22688e+06	1.49918e+06	positive	0.960722
1-(1-enyl-palmitoyl)-2-oleoyl-GPC (P-16:0/18:1)*	Direct_bilirubin_umol_L_PGS000681	Under 45	metabolomics	0.206701	0.0822292	0.285702	-1.29645e+06	1.213e+06	negative	0.941773
1-(1-enyl-palmitoyl)-2-docosahexaenoyl-GPC (P-16:0/22:6)*	Direct_bilirubin_umol_L_PGS000681	Under 45	metabolomics	0.157932	0.0244122	0.390289	1.41434e+06	1.6448e+06	positive	0.958715
1-(1-enyl-palmitoyl)-2-linoleoyl-GPC (P-16:0/18:2)*	Direct_bilirubin_umol_L_PGS000681	Under 45	metabolomics	0.170149	0.0385654	0.853642	235659	1.27677e+06	positive	0.994876
1-(1-enyl-palmitoyl)-2-arachidonoyl-GPC (P-16:0/20:4)*	Direct_bilirubin_umol_L_PGS000681	Under 45	metabolomics	0.149427	0.0145581	0.576884	824868	1.47739e+06	positive	0.976335
1-(1-enyl-stearoyl)-2-docosahexaenoyl-GPC (P-18:0/22:6)*	Direct_bilirubin_umol_L_PGS000681	Under 45	metabolomics	0.152331	0.0173524	0.829909	420867	1.95808e+06	positive	0.993466
1-stearyl-2-arachidonoyl-GPC (O-18:0/20:4)*	Direct_bilirubin_umol_L_PGS000681	Under 45	metabolomics	0.188764	0.0595861	0.320528	-1.42591e+06	1.43391e+06	negative	0.947942
1-palmityl-2-oleoyl-GPC (O-16:0/18:1)*	Direct_bilirubin_umol_L_PGS000681	Under 45	metabolomics	0.208533	0.0827699	0.34994	-1.06908e+06	1.14262e+06	negative	0.952972
1-palmityl-2-arachidonoyl-GPC (O-16:0/20:4)*	Direct_bilirubin_umol_L_PGS000681	Under 45	metabolomics	0.189928	0.0606616	0.397888	1.15232e+06	1.3618e+06	positive	0.959422
sphingomyelin (d18:1/21:0, d17:1/22:0, d16:1/23:0)*	Direct_bilirubin_umol_L_PGS000681	Under 45	metabolomics	0.187099	0.0568261	0.382824	-1.19609e+06	1.36926e+06	negative	0.957756
behenoyl dihydrosphingomyelin (d18:0/22:0)*	Direct_bilirubin_umol_L_PGS000681	Under 45	metabolomics	0.196292	0.0683127	0.950204	141104	2.25826e+06	positive	0.998914
sphingomyelin (d18:0/18:0, d19:0/17:0)*	Direct_bilirubin_umol_L_PGS000681	Under 45	metabolomics	0.149755	0.0155063	0.846311	619054	3.1921e+06	positive	0.99457
N-palmitoyl-sphinganine (d18:0/16:0)	Direct_bilirubin_umol_L_PGS000681	Under 45	metabolomics	0.178246	0.047394	0.0955757	2.79878e+06	1.67588e+06	positive	0.870574
lactosyl-N-palmitoyl-sphingosine (d18:1/16:0)	Direct_bilirubin_umol_L_PGS000681	Under 45	metabolomics	0.199014	0.0720074	0.523321	-672716	1.05324e+06	negative	0.971726
1-pentadecanoyl-2-linoleoyl-GPC (15:0/18:2)*	Direct_bilirubin_umol_L_PGS000681	Under 45	metabolomics	0.145439	0.0110742	0.619557	710458	1.43006e+06	positive	0.979869
1-margaroyl-2-oleoyl-GPC (17:0/18:1)*	Direct_bilirubin_umol_L_PGS000681	Under 45	metabolomics	0.160798	0.0277326	0.888227	-174977	1.24429e+06	negative	0.99612
1-margaroyl-2-linoleoyl-GPC (17:0/18:2)*	Direct_bilirubin_umol_L_PGS000681	Under 45	metabolomics	0.144444	0.00907162	0.767283	325985	1.10093e+06	positive	0.989608
myristoyl dihydrosphingomyelin (d18:0/14:0)*	Direct_bilirubin_umol_L_PGS000681	Under 45	metabolomics	0.169619	0.038229	0.922631	138942	1.42986e+06	positive	0.997213
1-stearoyl-2-dihomo-linolenoyl-GPC (18:0/20:3n3 or 6)*	Direct_bilirubin_umol_L_PGS000681	Under 45	metabolomics	0.154958	0.0215306	0.152476	1.83195e+06	1.27828e+06	positive	0.90429
palmitoyl-linoleoyl-glycerol (16:0/18:2) [1]*	Direct_bilirubin_umol_L_PGS000681	Under 45	metabolomics	0.16222	0.0299389	0.0354715	8.4617e+06	4.01227e+06	positive	0.785165
palmitoyl-linoleoyl-glycerol (16:0/18:2) [2]*	Direct_bilirubin_umol_L_PGS000681	Under 45	metabolomics	0.148605	0.0115777	0.0229275	8.27459e+06	3.62571e+06	positive	0.738898
1-palmitoyl-2-oleoyl-GPI (16:0/18:1)*	Direct_bilirubin_umol_L_PGS000681	Under 45	metabolomics	0.156767	0.0227792	0.733368	858081	2.51748e+06	positive	0.987064
1-(1-enyl-palmitoyl)-2-linoleoyl-GPE (P-16:0/18:2)*	Direct_bilirubin_umol_L_PGS000681	Under 45	metabolomics	0.149955	0.0148847	0.0809571	3.40367e+06	1.94617e+06	positive	0.856571
1-oleoyl-2-linoleoyl-GPE (18:1/18:2)*	Direct_bilirubin_umol_L_PGS000681	Under 45	metabolomics	0.127768	-0.0160067	0.115691	5.49338e+06	3.48536e+06	positive	0.88545
1-pentadecanoyl-2-arachidonoyl-GPC (15:0/20:4)*	Direct_bilirubin_umol_L_PGS000681	Under 45	metabolomics	0.19535	0.0674928	0.794702	-440927	1.69355e+06	negative	0.992663
1-pentadecanoyl-2-docosahexaenoyl-GPC (15:0/22:6)*	Direct_bilirubin_umol_L_PGS000681	Under 45	metabolomics	0.153141	0.0191444	0.389295	-1.57325e+06	1.82578e+06	negative	0.958683
1-margaroyl-2-arachidonoyl-GPC (17:0/20:4)*	Direct_bilirubin_umol_L_PGS000681	Under 45	metabolomics	0.197762	0.0694729	0.1471	-2.15292e+06	1.48247e+06	negative	0.902167
1-margaroyl-2-docosahexaenoyl-GPC (17:0/22:6)*	Direct_bilirubin_umol_L_PGS000681	Under 45	metabolomics	0.114962	-0.0309228	0.751856	-670358	2.11881e+06	negative	0.988536
1-arachidoyl-2-arachidonoyl-GPC (20:0/20:4)*	Direct_bilirubin_umol_L_PGS000681	Under 45	metabolomics	0.159456	0.0256113	0.717218	721139	1.98992e+06	positive	0.98621
1-oleoyl-2-docosahexaenoyl-GPC (18:1/22:6)*	Direct_bilirubin_umol_L_PGS000681	Under 45	metabolomics	0.172454	0.0395502	0.860966	-197191	1.12525e+06	negative	0.995168
1-linoleoyl-2-docosahexaenoyl-GPC (18:2/22:6)*	Direct_bilirubin_umol_L_PGS000681	Under 45	metabolomics	0.174244	0.0435869	0.624179	739527	1.50845e+06	positive	0.97996
1-palmityl-2-linoleoyl-GPC (O-16:0/18:2)*	Direct_bilirubin_umol_L_PGS000681	Under 45	metabolomics	0.181859	0.0524068	0.0648567	2.84659e+06	1.53824e+06	positive	0.839657
1-(1-enyl-stearoyl)-2-linoleoyl-GPC (P-18:0/18:2)*	Direct_bilirubin_umol_L_PGS000681	Under 45	metabolomics	0.185653	0.0557042	0.965964	-73280.7	1.71641e+06	negative	0.999325
1-myristoyl-2-linoleoyl-GPC (14:0/18:2)*	Direct_bilirubin_umol_L_PGS000681	Under 45	metabolomics	0.126701	-0.011188	0.0752408	3.49645e+06	1.9611e+06	positive	0.852158
1-myristoyl-2-arachidonoyl-GPC (14:0/20:4)*	Direct_bilirubin_umol_L_PGS000681	Under 45	metabolomics	0.163435	0.0307876	0.0669559	5.04821e+06	2.74927e+06	positive	0.842863
1-myristoyl-2-docosahexaenoyl-GPC (14:0/22:6)*	Direct_bilirubin_umol_L_PGS000681	Under 45	metabolomics	0.168896	0.0365549	0.162749	3.32853e+06	2.3808e+06	positive	0.908123
1-stearoyl-2-docosapentaenoyl-GPC (18:0/22:5n3)*	Direct_bilirubin_umol_L_PGS000681	Under 45	metabolomics	0.161536	0.029147	0.618137	702144	1.40761e+06	positive	0.979756
1-stearoyl-2-docosapentaenoyl-GPC (18:0/22:5n6)*	Direct_bilirubin_umol_L_PGS000681	Under 45	metabolomics	0.153388	0.0177126	0.251714	2.78044e+06	2.4228e+06	positive	0.935108
1-palmitoyl-2-adrenoyl-GPC (16:0/22:4)*	Direct_bilirubin_umol_L_PGS000681	Under 45	metabolomics	0.149486	0.014627	0.192629	2.47447e+06	1.89658e+06	positive	0.918428
1-stearoyl-2-adrenoyl-GPC (18:0/22:4)*	Direct_bilirubin_umol_L_PGS000681	Under 45	metabolomics	0.169749	0.0383801	0.263445	2.21355e+06	1.97706e+06	positive	0.93719
1-(1-enyl-palmitoyl)-2-palmitoleoyl-GPC (P-16:0/16:1)*	Direct_bilirubin_umol_L_PGS000681	Under 45	metabolomics	0.141751	0.00537706	0.66753	628301	1.46181e+06	positive	0.982945
1-(1-enyl-palmitoyl)-2-myristoyl-GPC (P-16:0/14:0)*	Direct_bilirubin_umol_L_PGS000681	Under 45	metabolomics	0.147716	0.00374856	0.984842	39950.1	2.10151e+06	positive	0.999574
1-(1-enyl-palmitoyl)-2-palmitoyl-GPC (P-16:0/16:0)*	Direct_bilirubin_umol_L_PGS000681	Under 45	metabolomics	0.183693	0.0545304	0.723331	366618	1.035e+06	positive	0.986598
phosphatidylcholine (16:0/22:5n3, 18:1/20:4)*	Direct_bilirubin_umol_L_PGS000681	Under 45	metabolomics	0.134712	-0.00191264	0.459568	-907984	1.22674e+06	negative	0.966318
1-stearoyl-2-oleoyl-GPI (18:0/18:1)*	Direct_bilirubin_umol_L_PGS000681	Under 45	metabolomics	0.16748	0.0354731	0.773136	-670316	2.32394e+06	negative	0.990365
1-stearoyl-2-dihomo-linolenoyl-GPI (18:0/20:3n3 or 6)*	Direct_bilirubin_umol_L_PGS000681	Under 45	metabolomics	0.103799	-0.0374086	0.420086	1.6105e+06	1.99573e+06	positive	0.961617
1-stearoyl-2-dihomo-linolenoyl-GPE (18:0/20:3n3 or 6)*	Direct_bilirubin_umol_L_PGS000681	Under 45	metabolomics	0.127196	-0.0103252	0.124139	5.09419e+06	3.30715e+06	positive	0.889392
1-(1-enyl-stearoyl)-2-linoleoyl-GPE (P-18:0/18:2)*	Direct_bilirubin_umol_L_PGS000681	Under 45	metabolomics	0.168622	0.0353882	0.130133	2.69555e+06	1.77778e+06	positive	0.893811
1-linoleoyl-GPG (18:2)*	Direct_bilirubin_umol_L_PGS000681	Under 45	metabolomics	0.124302	-0.0184754	0.234481	2.59285e+06	2.17803e+06	positive	0.931842
thioproline	Direct_bilirubin_umol_L_PGS000681	Under 45	metabolomics	0.161779	0.0285874	0.0371216	2.39382e+06	1.14518e+06	positive	0.789519
palmitoylcholine	Direct_bilirubin_umol_L_PGS000681	Under 45	metabolomics	0.185033	0.0552617	0.75076	-1.17478e+06	3.69632e+06	negative	0.988512
glycochenodeoxycholate glucuronide (1)	Direct_bilirubin_umol_L_PGS000681	Under 45	metabolomics	0.136162	-0.00376845	0.000903668	4.06307e+07	1.21628e+07	positive	0.32453
(S)-3-hydroxybutyrylcarnitine	Direct_bilirubin_umol_L_PGS000681	Under 45	metabolomics	0.136143	-0.00112283	0.533599	-1.62869e+06	2.61436e+06	negative	0.973183
glycosyl-N-palmitoyl-sphingosine (d18:1/16:0)	Direct_bilirubin_umol_L_PGS000681	Under 45	metabolomics	0.181981	0.0525476	0.638971	589644	1.25606e+06	positive	0.98044
oleoylcholine	Direct_bilirubin_umol_L_PGS000681	Under 45	metabolomics	0.173883	0.0406383	0.414567	-3.43465e+06	4.20596e+06	negative	0.960735
arachidonoylcholine	Direct_bilirubin_umol_L_PGS000681	Under 45	metabolomics	0.166865	0.0283166	0.881095	-547186	3.65603e+06	negative	0.995888
docosahexaenoylcholine	Direct_bilirubin_umol_L_PGS000681	Under 45	metabolomics	0.191267	0.0511866	0.988685	-49838.8	3.51213e+06	negative	0.999574
1-linoleoyl-2-linolenoyl-GPC (18:2/18:3)*	Direct_bilirubin_umol_L_PGS000681	Under 45	metabolomics	0.169756	0.0378314	0.468616	2.29111e+06	3.15876e+06	positive	0.966764
1-palmitoleoyl-2-linolenoyl-GPC (16:1/18:3)*	Direct_bilirubin_umol_L_PGS000681	Under 45	metabolomics	0.130549	-0.0140381	0.0540221	5.10559e+06	2.64305e+06	positive	0.825264
phosphatidylcholine (14:0/14:0, 16:0/12:0)	Direct_bilirubin_umol_L_PGS000681	Under 45	metabolomics	0.0965126	-0.0504756	0.254457	9.27346e+06	8.1274e+06	positive	0.935842
phosphatidylcholine (15:0/18:1, 17:0/16:1, 16:0/17:1)*	Direct_bilirubin_umol_L_PGS000681	Under 45	metabolomics	0.136611	-0.000289836	0.984962	27959.4	1.4826e+06	positive	0.999574
phosphatidylcholine (18:0/20:2, 20:0/18:2)*	Direct_bilirubin_umol_L_PGS000681	Under 45	metabolomics	0.122399	-0.0179425	0.572276	645442	1.14217e+06	positive	0.97626
1-(1-enyl-oleoyl)-2-docosahexaenoyl-GPE (P-18:1/22:6)*	Direct_bilirubin_umol_L_PGS000681	Under 45	metabolomics	0.159114	0.0254986	0.580484	1.13793e+06	2.05752e+06	positive	0.976712
1-(1-enyl-stearoyl)-2-dihomo-linolenoyl-GPE (P-18:0/20:3)*	Direct_bilirubin_umol_L_PGS000681	Under 45	metabolomics	0.154645	0.0203194	0.0282657	5.42875e+06	2.46722e+06	positive	0.764166
hexadecadienoate (16:2n6)	Direct_bilirubin_umol_L_PGS000681	Under 45	metabolomics	0.127726	-0.0120615	0.325754	2.76505e+06	2.81077e+06	positive	0.948573
palmitoleoylcarnitine (C16:1)*	Direct_bilirubin_umol_L_PGS000681	Under 45	metabolomics	0.138109	0.00144505	0.710056	-739790	1.98866e+06	negative	0.985495
4-hydroxyphenylacetylglutamine	Direct_bilirubin_umol_L_PGS000681	Under 45	metabolomics	0.116782	-0.0409356	0.0883612	7.65166e+06	4.4797e+06	positive	0.864136
2'-O-methyluridine	Direct_bilirubin_umol_L_PGS000681	Under 45	metabolomics	0.139932	-0.00121701	0.474301	-1.47782e+06	2.06373e+06	negative	0.96714
gamma-glutamyl-alpha-lysine	Direct_bilirubin_umol_L_PGS000681	Under 45	metabolomics	0.119662	-0.0196318	0.648172	453091	992330	positive	0.981433
palmitoyl-oleoyl-glycerol (16:0/18:1) [1]*	Direct_bilirubin_umol_L_PGS000681	Under 45	metabolomics	0.179997	0.0427202	0.0750457	7.21429e+06	4.04312e+06	positive	0.852158
palmitoyl-oleoyl-glycerol (16:0/18:1) [2]*	Direct_bilirubin_umol_L_PGS000681	Under 45	metabolomics	0.161736	0.0282545	0.0873517	5.92248e+06	3.45716e+06	positive	0.862118
oleoyl-oleoyl-glycerol (18:1/18:1) [1]*	Direct_bilirubin_umol_L_PGS000681	Under 45	metabolomics	0.137828	0.0016951	0.0367351	5.33356e+06	2.54633e+06	positive	0.788102
oleoyl-oleoyl-glycerol (18:1/18:1) [2]*	Direct_bilirubin_umol_L_PGS000681	Under 45	metabolomics	0.144557	0.00948693	0.0318876	5.43256e+06	2.52423e+06	positive	0.775842
linoleoyl-arachidonoyl-glycerol (18:2/20:4) [1]*	Direct_bilirubin_umol_L_PGS000681	Under 45	metabolomics	0.132126	-0.00666021	0.0738581	6.08307e+06	3.39552e+06	positive	0.850311
linoleoyl-linolenoyl-glycerol (18:2/18:3) [2]*	Direct_bilirubin_umol_L_PGS000681	Under 45	metabolomics	0.134134	-0.00492399	0.012862	1.11812e+07	4.47753e+06	positive	0.678006
palmitoleoyl-linoleoyl-glycerol (16:1/18:2) [1]*	Direct_bilirubin_umol_L_PGS000681	Under 45	metabolomics	0.156855	0.0223102	0.02928	9.492e+06	4.34142e+06	positive	0.765924
oleoyl-arachidonoyl-glycerol (18:1/20:4) [1]*	Direct_bilirubin_umol_L_PGS000681	Under 45	metabolomics	0.127775	-0.0126048	0.0960611	4.34561e+06	2.60586e+06	positive	0.871158
oleoyl-arachidonoyl-glycerol (18:1/20:4) [2]*	Direct_bilirubin_umol_L_PGS000681	Under 45	metabolomics	0.135444	-0.00222428	0.0363034	5.50765e+06	2.6233e+06	positive	0.786971
diacylglycerol (16:1/18:2 [2], 16:0/18:3 [1])*	Direct_bilirubin_umol_L_PGS000681	Under 45	metabolomics	0.159578	0.0240264	0.0152542	1.06401e+07	4.36913e+06	positive	0.695103
linoleoyl-linoleoyl-glycerol (18:2/18:2) [1]*	Direct_bilirubin_umol_L_PGS000681	Under 45	metabolomics	0.133516	-0.00358567	0.0681393	5.8731e+06	3.21241e+06	positive	0.843898
stearoyl-arachidonoyl-glycerol (18:0/20:4) [1]*	Direct_bilirubin_umol_L_PGS000681	Under 45	metabolomics	0.124721	-0.0186113	0.521235	1.31212e+06	2.044e+06	positive	0.971586
perfluorooctanesulfonate (PFOS)	Direct_bilirubin_umol_L_PGS000681	Under 45	metabolomics	0.152428	0.0168889	0.392706	-3.03071e+06	3.54258e+06	negative	0.958992
1-palmityl-2-stearoyl-GPC (O-16:0/18:0)*	Direct_bilirubin_umol_L_PGS000681	Under 45	metabolomics	0.196045	0.068837	0.165994	-2.4761e+06	1.7848e+06	negative	0.909145
1-palmityl-2-palmitoyl-GPC (O-16:0/16:0)*	Direct_bilirubin_umol_L_PGS000681	Under 45	metabolomics	0.169903	0.0377216	0.91394	106700	986787	positive	0.996888
1-stearyl-2-docosapentaenoyl-GPC (O-18:0/22:5n3)*	Direct_bilirubin_umol_L_PGS000681	Under 45	metabolomics	0.188318	0.0579617	0.789871	-340690	1.27776e+06	negative	0.992319
1-stearoyl-2-docosapentaenoyl-GPE (18:0/22:5n6)*	Direct_bilirubin_umol_L_PGS000681	Under 45	metabolomics	0.145374	0.00325256	0.0920577	9.22203e+06	5.46254e+06	positive	0.866755
1-(1-enyl-stearoyl)-2-docosapentaenoyl-GPE (P-18:0/22:5n3)*	Direct_bilirubin_umol_L_PGS000681	Under 45	metabolomics	0.165885	0.0324972	0.56602	1.16752e+06	2.03285e+06	positive	0.975878
lactosyl-N-nervonoyl-sphingosine (d18:1/24:1)*	Direct_bilirubin_umol_L_PGS000681	Under 45	metabolomics	0.18977	0.0615685	0.232457	-1.82893e+06	1.52974e+06	negative	0.93183
N-behenoyl-sphingadienine (d18:2/22:0)*	Direct_bilirubin_umol_L_PGS000681	Under 45	metabolomics	0.128742	-0.0105846	0.735536	645119	1.9088e+06	positive	0.987186
glycosyl-N-behenoyl-sphingadienine (d18:2/22:0)*	Direct_bilirubin_umol_L_PGS000681	Under 45	metabolomics	0.195083	0.0677225	0.72322	520936	1.47004e+06	positive	0.986598
phosphatidylethanolamine (P-18:1/20:4, P-16:0/22:5n3)*	Direct_bilirubin_umol_L_PGS000681	Under 45	metabolomics	0.167371	0.0339369	0.164487	2.37811e+06	1.70802e+06	positive	0.908484
1-palmitoyl-2-(hydroxylinoleoyl)-GPC (16:0/18:2(OH))*	Direct_bilirubin_umol_L_PGS000681	Under 45	metabolomics	0.160509	0.0227368	0.00444781	6.4567e+06	2.25859e+06	positive	0.540638
ceramide (d16:1/24:1, d18:1/22:1)*	Direct_bilirubin_umol_L_PGS000681	Under 45	metabolomics	0.169428	0.0294435	0.714865	674124	1.84407e+06	positive	0.985832
ceramide (d18:1/14:0, d16:1/16:0)*	Direct_bilirubin_umol_L_PGS000681	Under 45	metabolomics	0.136694	-0.00315052	0.949604	-107602	1.70151e+06	negative	0.998914
ceramide (d18:1/17:0, d17:1/18:0)*	Direct_bilirubin_umol_L_PGS000681	Under 45	metabolomics	0.169024	0.0299101	0.376093	1.89534e+06	2.13921e+06	positive	0.95669
ceramide (d18:2/24:1, d18:1/24:2)*	Direct_bilirubin_umol_L_PGS000681	Under 45	metabolomics	0.169659	0.0382763	0.156779	2.0411e+06	1.43918e+06	positive	0.906071
glycosyl ceramide (d18:2/24:1, d18:1/24:2)*	Direct_bilirubin_umol_L_PGS000681	Under 45	metabolomics	0.206548	0.0810013	0.790877	-423875	1.59759e+06	negative	0.992336
ceramide (d18:1/20:0, d16:1/22:0, d20:1/18:0)*	Direct_bilirubin_umol_L_PGS000681	Under 45	metabolomics	0.160175	0.0261604	0.442794	1.1156e+06	1.45235e+06	positive	0.964472
linoleoylcholine*	Direct_bilirubin_umol_L_PGS000681	Under 45	metabolomics	0.174602	0.0440006	0.957062	-213812	3.96913e+06	negative	0.998914
sphingomyelin (d18:0/20:0, d16:0/22:0)*	Direct_bilirubin_umol_L_PGS000681	Under 45	metabolomics	0.192357	0.0640244	0.691942	-944521	2.38236e+06	negative	0.984409
sphingomyelin (d18:1/19:0, d19:1/18:0)*	Direct_bilirubin_umol_L_PGS000681	Under 45	metabolomics	0.17499	0.0447254	0.446323	-1.05634e+06	1.38592e+06	negative	0.964966
sphingomyelin (d18:2/18:1)*	Direct_bilirubin_umol_L_PGS000681	Under 45	metabolomics	0.169149	0.0374071	0.556539	674890	1.14697e+06	positive	0.975102
sphingomyelin (d18:2/24:2)*	Direct_bilirubin_umol_L_PGS000681	Under 45	metabolomics	0.150972	0.0157765	0.721615	411887	1.15532e+06	positive	0.986445
sphingomyelin (d18:2/21:0, d16:2/23:0)*	Direct_bilirubin_umol_L_PGS000681	Under 45	metabolomics	0.173795	0.0427899	0.588222	-688850	1.27145e+06	negative	0.977445
sphingomyelin (d18:2/23:1)*	Direct_bilirubin_umol_L_PGS000681	Under 45	metabolomics	0.164885	0.0330252	0.783203	-377487	1.37117e+06	negative	0.991677
sphingomyelin (d18:1/25:0, d19:0/24:1, d20:1/23:0, d19:1/24:0)*	Direct_bilirubin_umol_L_PGS000681	Under 45	metabolomics	0.188084	0.0587976	0.258287	-1.88162e+06	1.66248e+06	negative	0.936408
sphingomyelin (d17:2/16:0, d18:2/15:0)*	Direct_bilirubin_umol_L_PGS000681	Under 45	metabolomics	0.173644	0.0420586	0.632774	-704379	1.47317e+06	negative	0.980412
linolenoylcarnitine (C18:3)*	Direct_bilirubin_umol_L_PGS000681	Under 45	metabolomics	0.157944	0.0244251	0.466671	1.63327e+06	2.24198e+06	positive	0.966764
behenoylcarnitine (C22)*	Direct_bilirubin_umol_L_PGS000681	Under 45	metabolomics	0.182023	0.0359554	0.67646	-1.51931e+06	3.63828e+06	negative	0.983631
arachidoylcarnitine (C20)*	Direct_bilirubin_umol_L_PGS000681	Under 45	metabolomics	0.171441	0.0272605	0.983879	34128.4	1.688e+06	positive	0.999574
lignoceroylcarnitine (C24)*	Direct_bilirubin_umol_L_PGS000681	Under 45	metabolomics	0.147221	0.00997107	0.845952	353899	1.82052e+06	positive	0.994564
cerotoylcarnitine (C26)*	Direct_bilirubin_umol_L_PGS000681	Under 45	metabolomics	0.124029	-0.0148668	0.798678	-381581	1.49521e+06	negative	0.992904
ximenoylcarnitine (C26:1)*	Direct_bilirubin_umol_L_PGS000681	Under 45	metabolomics	0.12544	-0.0156176	0.881959	-234968	1.58156e+06	negative	0.995888
arachidonoylcarnitine (C20:4)	Direct_bilirubin_umol_L_PGS000681	Under 45	metabolomics	0.127926	-0.0100604	0.624369	-1.0164e+06	2.07435e+06	negative	0.97996
eicosenoylcarnitine (C20:1)*	Direct_bilirubin_umol_L_PGS000681	Under 45	metabolomics	0.130179	-0.00862185	0.334929	-1.64789e+06	1.70726e+06	negative	0.949654
dihomo-linoleoylcarnitine (C20:2)*	Direct_bilirubin_umol_L_PGS000681	Under 45	metabolomics	0.145835	0.00953211	0.848169	319688	1.66886e+06	positive	0.994608
dihomo-linolenoylcarnitine (C20:3n3 or 6)*	Direct_bilirubin_umol_L_PGS000681	Under 45	metabolomics	0.169282	0.037562	0.209416	2.93435e+06	2.33462e+06	positive	0.924459
docosahexaenoylcarnitine (C22:6)*	Direct_bilirubin_umol_L_PGS000681	Under 45	metabolomics	0.145715	0.00141055	0.495251	-2.30788e+06	3.3813e+06	negative	0.969479
nervonoylcarnitine (C24:1)*	Direct_bilirubin_umol_L_PGS000681	Under 45	metabolomics	0.152286	0.0131643	0.978223	-42482	1.55542e+06	negative	0.999574
N,N,N-trimethyl-5-aminovalerate	Direct_bilirubin_umol_L_PGS000681	Under 45	metabolomics	0.133543	-0.00711564	0.667931	754365	1.75734e+06	positive	0.982945
ethyl alpha-glucopyranoside	Direct_bilirubin_umol_L_PGS000681	Under 45	metabolomics	0.135558	-0.0166321	0.181135	-2.81641e+07	2.10265e+07	negative	0.914179
carotene diol (1)	Direct_bilirubin_umol_L_PGS000681	Under 45	metabolomics	0.18624	0.054136	0.797879	-555947	2.16963e+06	negative	0.992842
carotene diol (2)	Direct_bilirubin_umol_L_PGS000681	Under 45	metabolomics	0.146719	0.0090932	0.711918	1.25101e+06	3.38561e+06	positive	0.985746
carotene diol (3)	Direct_bilirubin_umol_L_PGS000681	Under 45	metabolomics	0.196192	0.0622243	0.336925	-2.89756e+06	3.01425e+06	negative	0.950467
cortolone glucuronide (1)	Direct_bilirubin_umol_L_PGS000681	Under 45	metabolomics	0.173305	0.0427747	0.510463	1.12098e+06	1.70203e+06	positive	0.971277
(N(1) + N(8))-acetylspermidine	Direct_bilirubin_umol_L_PGS000681	Under 45	metabolomics	0.153847	0.0143714	0.481853	1.26333e+06	1.79474e+06	positive	0.967615
5-dodecenoylcarnitine (C12:1)	Direct_bilirubin_umol_L_PGS000681	Under 45	metabolomics	0.134374	-0.00494358	0.986926	50258.7	3.06531e+06	positive	0.999574
hydroxy-CMPF*	Direct_bilirubin_umol_L_PGS000681	Under 45	metabolomics	0.118836	-0.0214762	0.647052	-2.11402e+06	4.6142e+06	negative	0.981401
dodecenedioate (C12:1-DC)*	Direct_bilirubin_umol_L_PGS000681	Under 45	metabolomics	0.131891	-0.0144197	0.716286	1.96579e+06	5.40561e+06	positive	0.986147
hexadecenedioate (C16:1-DC)*	Direct_bilirubin_umol_L_PGS000681	Under 45	metabolomics	0.142745	0.00536452	0.287642	3.46685e+06	3.25672e+06	positive	0.942074
octadecenedioate (C18:1-DC)*	Direct_bilirubin_umol_L_PGS000681	Under 45	metabolomics	0.131011	-0.00707011	0.441376	2.10363e+06	2.73014e+06	positive	0.964384
octadecadienedioate (C18:2-DC)*	Direct_bilirubin_umol_L_PGS000681	Under 45	metabolomics	0.148233	0.0140255	0.914088	-1.45659e+06	1.34943e+07	negative	0.996888
3-carboxy-4-methyl-5-pentyl-2-furanpropionate (3-CMPFP)**	Direct_bilirubin_umol_L_PGS000681	Under 45	metabolomics	0.150166	0.0148426	0.388707	-1.51464e+06	1.75557e+06	negative	0.958635
N-acetyl-2-aminooctanoate*	Direct_bilirubin_umol_L_PGS000681	Under 45	metabolomics	0.140792	0.00339255	0.576443	-1.5269e+06	2.73159e+06	negative	0.97631
hydroxyasparagine**	Direct_bilirubin_umol_L_PGS000681	Under 45	metabolomics	0.138901	0.00265162	0.0710504	1.61266e+06	891358	positive	0.84818
perfluorooctanoate (PFOA)	Direct_bilirubin_umol_L_PGS000681	Under 45	metabolomics	0.103938	-0.037546	0.704813	-1.7775e+06	4.68924e+06	negative	0.985111
3-formylindole	Direct_bilirubin_umol_L_PGS000681	Under 45	metabolomics	0.155306	0.0216524	0.452001	1.11124e+06	1.47633e+06	positive	0.965654
gamma-glutamylcitrulline*	Direct_bilirubin_umol_L_PGS000681	Under 45	metabolomics	0.138429	-0.00143671	0.485949	-1.35716e+06	1.94624e+06	negative	0.968083
glycine conjugate of C10H14O2 (1)*	Direct_bilirubin_umol_L_PGS000681	Under 45	metabolomics	0.132622	-0.00757946	0.652688	1.43382e+06	3.18398e+06	positive	0.981655
glutamine conjugate of C7H12O2*	Direct_bilirubin_umol_L_PGS000681	Under 45	metabolomics	0.13601	-0.00703471	0.0602556	-9.60761e+06	5.10059e+06	negative	0.834604
glutamine conjugate of C6H10O2 (1)*	Direct_bilirubin_umol_L_PGS000681	Under 45	metabolomics	0.113169	-0.0283462	0.673994	-1.76898e+06	4.2025e+06	negative	0.983479
glutamine conjugate of C6H10O2 (2)*	Direct_bilirubin_umol_L_PGS000681	Under 45	metabolomics	0.0939775	-0.0604581	0.392047	-5.16082e+06	6.02369e+06	negative	0.958992
tetradecadienoate (14:2)*	Direct_bilirubin_umol_L_PGS000681	Under 45	metabolomics	0.119562	-0.020635	0.991261	41929.9	3.82608e+06	positive	0.999709
3-amino-2-piperidone	Direct_bilirubin_umol_L_PGS000681	Under 45	metabolomics	0.159395	0.0196047	0.0465427	2.69698e+06	1.35124e+06	positive	0.81503
N,N-dimethylalanine	Direct_bilirubin_umol_L_PGS000681	Under 45	metabolomics	0.127475	-0.0144758	0.302155	-4.68976e+06	4.54003e+06	negative	0.944752
3-indoleglyoxylic acid	Direct_bilirubin_umol_L_PGS000681	Under 45	metabolomics	0.177561	0.0440477	0.0392797	4.30546e+06	2.08283e+06	positive	0.793427
ascorbic acid 3-sulfate*	Direct_bilirubin_umol_L_PGS000681	Under 45	metabolomics	0.128666	-0.00920292	0.724702	431052	1.22322e+06	positive	0.986598
6-bromotryptophan	Direct_bilirubin_umol_L_PGS000681	Under 45	metabolomics	0.158957	0.0255997	0.680185	-546691	1.32542e+06	negative	0.984002
1-carboxyethylphenylalanine	Direct_bilirubin_umol_L_PGS000681	Under 45	metabolomics	0.189447	0.0598273	0.0200349	5.07473e+06	2.17458e+06	positive	0.725717
1-carboxyethylvaline	Direct_bilirubin_umol_L_PGS000681	Under 45	metabolomics	0.152451	0.011193	0.357244	2.3745e+06	2.57657e+06	positive	0.953573
1-carboxyethylleucine	Direct_bilirubin_umol_L_PGS000681	Under 45	metabolomics	0.182217	0.0365307	0.305455	2.60325e+06	2.53714e+06	positive	0.945414
dodecadienoate (12:2)*	Direct_bilirubin_umol_L_PGS000681	Under 45	metabolomics	0.119668	-0.0208109	0.87098	-365731	2.25061e+06	negative	0.995307
N-acetyl-isoputreanine	Direct_bilirubin_umol_L_PGS000681	Under 45	metabolomics	0.168601	0.038151	0.700023	618339	1.60391e+06	positive	0.984983
glucuronide of piperine metabolite C17H21NO3 (3)*	Direct_bilirubin_umol_L_PGS000681	Under 45	metabolomics	0.145902	-0.00376436	0.945163	-418389	6.0792e+06	negative	0.998832
glucuronide of piperine metabolite C17H21NO3 (4)*	Direct_bilirubin_umol_L_PGS000681	Under 45	metabolomics	0.138125	-0.00209327	0.258448	6.75764e+06	5.97248e+06	positive	0.936408
glucuronide of piperine metabolite C17H21NO3 (5)*	Direct_bilirubin_umol_L_PGS000681	Under 45	metabolomics	0.148903	0.0031675	0.407256	5.36774e+06	6.47082e+06	positive	0.960524
sulfate of piperine metabolite C16H19NO3 (2)*	Direct_bilirubin_umol_L_PGS000681	Under 45	metabolomics	0.163723	0.0288391	0.355414	4.32928e+06	4.68e+06	positive	0.95339
sulfate of piperine metabolite C16H19NO3 (3)*	Direct_bilirubin_umol_L_PGS000681	Under 45	metabolomics	0.166693	0.0317077	0.0818731	8.25906e+06	4.73648e+06	positive	0.857075
sulfate of piperine metabolite C18H21NO3 (1)*	Direct_bilirubin_umol_L_PGS000681	Under 45	metabolomics	0.164982	0.0223255	0.0864174	7.94713e+06	4.62456e+06	positive	0.861147
2-naphthol sulfate	Direct_bilirubin_umol_L_PGS000681	Under 45	metabolomics	0.111663	-0.0363935	0.402875	7.75673e+06	9.26412e+06	positive	0.959937
4-ethylcatechol sulfate	Direct_bilirubin_umol_L_PGS000681	Under 45	metabolomics	0.137986	-0.00536454	0.964537	392866	8.83131e+06	positive	0.999236
11beta-hydroxyandrosterone glucuronide	Direct_bilirubin_umol_L_PGS000681	Under 45	metabolomics	0.175147	0.042959	0.0360586	4.92616e+06	2.3432e+06	positive	0.786575
deoxycholic acid glucuronide	Direct_bilirubin_umol_L_PGS000681	Under 45	metabolomics	0.132994	-0.0108672	0.330676	-5.90622e+06	6.06513e+06	negative	0.949088
4-allylcatechol sulfate	Direct_bilirubin_umol_L_PGS000681	Under 45	metabolomics	0.144283	0.00476341	0.425503	-8.9504e+06	1.12214e+07	negative	0.962067
lithocholate sulfate (1)	Direct_bilirubin_umol_L_PGS000681	Under 45	metabolomics	0.141118	-0.00730626	0.202148	7.37194e+06	5.7711e+06	positive	0.922131
2-ketocaprylate	Direct_bilirubin_umol_L_PGS000681	Under 45	metabolomics	0.176963	0.0467361	0.409774	-2.05566e+06	2.49164e+06	negative	0.960701
2,3-dihydroxy-5-methylthio-4-pentenoate (DMTPA)*	Direct_bilirubin_umol_L_PGS000681	Under 45	metabolomics	0.140279	0.00424706	0.112726	1.41338e+06	889473	positive	0.884293
hydroxypalmitoyl sphingomyelin (d18:1/16:0(OH))**	Direct_bilirubin_umol_L_PGS000681	Under 45	metabolomics	0.173789	0.0422262	0.0631737	-1.86765e+06	1.00284e+06	negative	0.838283
tetradecadienedioate (C14:2-DC)*	Direct_bilirubin_umol_L_PGS000681	Under 45	metabolomics	0.134185	-0.0075964	0.290818	3.77602e+06	3.57054e+06	positive	0.942541
pregnenetriol disulfate*	Direct_bilirubin_umol_L_PGS000681	Under 45	metabolomics	0.142655	0.00642486	0.507452	2.78132e+06	4.19306e+06	positive	0.971076
eicosenedioate (C20:1-DC)*	Direct_bilirubin_umol_L_PGS000681	Under 45	metabolomics	0.147342	0.0106985	0.00921738	8.59807e+06	3.2883e+06	positive	0.641319
hydroxy-N6,N6,N6-trimethyllysine*	Direct_bilirubin_umol_L_PGS000681	Under 45	metabolomics	0.121833	-0.017706	0.128355	2.48182e+06	1.62924e+06	positive	0.892795
undecenoylcarnitine (C11:1)	Direct_bilirubin_umol_L_PGS000681	Under 45	metabolomics	0.150552	0.0167101	0.445182	-1.53007e+06	2.00243e+06	negative	0.964782
palmitoyl-sphingosine-phosphoethanolamine (d18:1/16:0)	Direct_bilirubin_umol_L_PGS000681	Under 45	metabolomics	0.173452	0.0415565	0.218365	-1.35604e+06	1.1002e+06	negative	0.926907
3,5-dichloro-2,6-dihydroxybenzoic acid	Direct_bilirubin_umol_L_PGS000681	Under 45	metabolomics	0.130589	-0.00785274	0.420269	1.59883e+06	1.98204e+06	positive	0.961617
(S)-a-amino-omega-caprolactam	Direct_bilirubin_umol_L_PGS000681	Under 45	metabolomics	0.151989	0.0155064	0.0208725	2.78644e+06	1.202e+06	positive	0.729071
metabolonic lactone sulfate	Direct_bilirubin_umol_L_PGS000681	Under 45	metabolomics	0.174271	0.0441662	0.116585	6.44606e+06	4.10021e+06	positive	0.886078
branched chain 14:0 dicarboxylic acid**	Direct_bilirubin_umol_L_PGS000681	Under 45	metabolomics	0.170668	0.0348598	0.953835	330274	5.70187e+06	positive	0.998914
(2 or 3)-decenoate (10:1n7 or n8)	Direct_bilirubin_umol_L_PGS000681	Under 45	metabolomics	0.114534	-0.0270654	0.792337	756081	2.87017e+06	positive	0.992428
branched-chain, straight-chain, or cyclopropyl 10:1 fatty acid (1)*	Direct_bilirubin_umol_L_PGS000681	Under 45	metabolomics	0.106951	-0.0343538	0.875263	-668614	4.25702e+06	negative	0.995465
3-bromo-5-chloro-2,6-dihydroxybenzoic acid*	Direct_bilirubin_umol_L_PGS000681	Under 45	metabolomics	0.114497	-0.0256141	0.437141	-1.40025e+06	1.80053e+06	negative	0.96374
branched-chain, straight-chain, or cyclopropyl 12:1 fatty acid*	Direct_bilirubin_umol_L_PGS000681	Under 45	metabolomics	0.135336	-0.00118968	0.82844	-735105	3.39036e+06	negative	0.99341
decadienedioic acid (C10:2-DC)**	Direct_bilirubin_umol_L_PGS000681	Under 45	metabolomics	0.146467	0.00880027	0.652022	1.68332e+06	3.73039e+06	positive	0.981655
4-chlorobenzoic acid	Direct_bilirubin_umol_L_PGS000681	Under 45	metabolomics	0.157287	0.0253378	0.750572	-170183	535054	negative	0.988512
X - 11261	Direct_bilirubin_umol_L_PGS000681	Under 45	metabolomics	0.137575	0.000827221	0.110593	3.71982e+06	2.32702e+06	positive	0.881949
X - 11381	Direct_bilirubin_umol_L_PGS000681	Under 45	metabolomics	0.142117	0.00722943	0.476758	-1.09299e+06	1.5349e+06	negative	0.967277
X - 11787	Direct_bilirubin_umol_L_PGS000681	Under 45	metabolomics	0.178905	0.0484349	0.854385	213171	1.1609e+06	positive	0.994876
X - 11795	Direct_bilirubin_umol_L_PGS000681	Under 45	metabolomics	0.15281	0.0181932	0.965451	215863	4.98103e+06	positive	0.999247
X - 21258	Direct_bilirubin_umol_L_PGS000681	Under 45	metabolomics	0.179277	0.049689	0.454011	7.80301e+06	1.04129e+07	positive	0.965752
X - 19438	Direct_bilirubin_umol_L_PGS000681	Under 45	metabolomics	0.167026	0.0323855	0.0681149	4.94505e+06	2.70442e+06	positive	0.843881
X - 15486	Direct_bilirubin_umol_L_PGS000681	Under 45	metabolomics	0.142782	0.00771564	0.193114	3.87012e+06	2.96956e+06	positive	0.918428
X - 15461	Direct_bilirubin_umol_L_PGS000681	Under 45	metabolomics	0.11084	-0.0313492	0.702936	-586414	1.53675e+06	negative	0.985111
X - 21286	Direct_bilirubin_umol_L_PGS000681	Under 45	metabolomics	0.127544	-0.0116778	0.208489	3.42346e+06	2.71819e+06	positive	0.924459
X - 21310	Direct_bilirubin_umol_L_PGS000681	Under 45	metabolomics	0.138354	-0.00430214	0.0360385	3.77558e+06	1.79554e+06	positive	0.786575
X - 11441	Direct_bilirubin_umol_L_PGS000681	Under 45	metabolomics	0.187147	0.0571597	1.55031e-11	2.69022e+07	3.89112e+06	positive	8.78874e-08
X - 21319	Direct_bilirubin_umol_L_PGS000681	Under 45	metabolomics	0.163078	0.0292417	0.715063	943615	2.58322e+06	positive	0.985873
X - 12847	Direct_bilirubin_umol_L_PGS000681	Under 45	metabolomics	0.140749	0.000348419	0.979039	-400660	1.52412e+07	negative	0.999574
X - 21339	Direct_bilirubin_umol_L_PGS000681	Under 45	metabolomics	0.151055	0.0164444	1.0681e-06	1.33687e+07	2.70438e+06	positive	0.00302755
X - 11308	Direct_bilirubin_umol_L_PGS000681	Under 45	metabolomics	0.173859	0.0420282	0.0326382	5.1078e+06	2.38365e+06	positive	0.776925
X - 21353	Direct_bilirubin_umol_L_PGS000681	Under 45	metabolomics	0.0967484	-0.0461712	0.687976	-1.43833e+06	3.57927e+06	negative	0.984311
X - 21364	Direct_bilirubin_umol_L_PGS000681	Under 45	metabolomics	0.158642	0.0240967	0.0161891	6.44282e+06	2.66966e+06	positive	0.705207
X - 13866	Direct_bilirubin_umol_L_PGS000681	Under 45	metabolomics	0.14003	0.00250851	0.223636	-7.43297e+06	6.09996e+06	negative	0.928906
X - 21383	Direct_bilirubin_umol_L_PGS000681	Under 45	metabolomics	0.142117	0.00315112	0.100427	-6.50601e+06	3.95244e+06	negative	0.874408
X - 11442	Direct_bilirubin_umol_L_PGS000681	Under 45	metabolomics	0.1685	0.0377606	1.44858e-10	2.42408e+07	3.69815e+06	positive	7.55509e-07
X - 11444	Direct_bilirubin_umol_L_PGS000681	Under 45	metabolomics	0.160931	0.0273209	0.119368	3.17631e+06	2.03575e+06	positive	0.887042
X - 21441	Direct_bilirubin_umol_L_PGS000681	Under 45	metabolomics	0.15053	0.012927	0.390192	3.46423e+06	4.02781e+06	positive	0.958715
X - 11847	Direct_bilirubin_umol_L_PGS000681	Under 45	metabolomics	0.1395	-0.000494477	0.773274	3.7851e+06	1.31307e+07	positive	0.990367
X - 21448	Direct_bilirubin_umol_L_PGS000681	Under 45	metabolomics	0.278836	0.164002	8.58817e-23	3.12222e+07	3.01395e+06	positive	7.72269e-19
X - 16938	Direct_bilirubin_umol_L_PGS000681	Under 45	metabolomics	0.163281	0.0280358	0.731531	595639	1.73506e+06	positive	0.986951
X - 21467	Direct_bilirubin_umol_L_PGS000681	Under 45	metabolomics	0.149786	0.00871023	0.680645	1.32692e+06	3.22185e+06	positive	0.984007
X - 21470	Direct_bilirubin_umol_L_PGS000681	Under 45	metabolomics	0.143448	0.00499686	0.0770253	1.23645e+07	6.97713e+06	positive	0.853819
X - 21471	Direct_bilirubin_umol_L_PGS000681	Under 45	metabolomics	0.128983	-0.00941995	0.540199	2.05439e+06	3.3516e+06	positive	0.973946
X - 16946	Direct_bilirubin_umol_L_PGS000681	Under 45	metabolomics	0.25713	0.139835	4.76573e-20	2.81833e+07	2.93706e+06	positive	3.8837e-16
X - 07765	Direct_bilirubin_umol_L_PGS000681	Under 45	metabolomics	0.136363	-0.0026339	0.182939	1.4375e+07	1.07779e+07	positive	0.915042
X - 11299	Direct_bilirubin_umol_L_PGS000681	Under 45	metabolomics	0.132127	-0.00755181	0.937866	529192	6.78496e+06	positive	0.998426
X - 11372	Direct_bilirubin_umol_L_PGS000681	Under 45	metabolomics	0.155261	0.02244	0.0555072	4.23562e+06	2.20654e+06	positive	0.828106
X - 11378	Direct_bilirubin_umol_L_PGS000681	Under 45	metabolomics	0.139515	0.00249466	0.922111	-280616	2.86846e+06	negative	0.997169
X - 11470	Direct_bilirubin_umol_L_PGS000681	Under 45	metabolomics	0.147404	0.0116401	0.953959	-150039	2.59731e+06	negative	0.998914
X - 11478	Direct_bilirubin_umol_L_PGS000681	Under 45	metabolomics	0.145526	0.0100388	0.585963	1.67963e+06	3.08149e+06	positive	0.977282
X - 11530	Direct_bilirubin_umol_L_PGS000681	Under 45	metabolomics	0.224206	0.101453	1.53124e-15	2.03524e+07	2.46574e+06	positive	1.02387e-11
X - 11849	Direct_bilirubin_umol_L_PGS000681	Under 45	metabolomics	0.146188	0.00906633	0.123204	1.45108e+07	9.39662e+06	positive	0.889392
X - 11880	Direct_bilirubin_umol_L_PGS000681	Under 45	metabolomics	0.140981	0.00448444	0.808717	560575	2.31434e+06	positive	0.993085
X - 12007	Direct_bilirubin_umol_L_PGS000681	Under 45	metabolomics	0.146249	-0.00128875	0.997699	-17846.5	6.18393e+06	negative	0.999941
X - 12216	Direct_bilirubin_umol_L_PGS000681	Under 45	metabolomics	0.12193	-0.0178901	0.608868	2.07158e+06	4.04579e+06	positive	0.978865
X - 12411	Direct_bilirubin_umol_L_PGS000681	Under 45	metabolomics	0.126632	-0.0121443	0.979779	119973	4.73098e+06	positive	0.999574
X - 12462	Direct_bilirubin_umol_L_PGS000681	Under 45	metabolomics	0.133976	-0.00363356	0.726824	-1.41519e+06	4.04849e+06	negative	0.986719
X - 12524	Direct_bilirubin_umol_L_PGS000681	Under 45	metabolomics	0.117958	-0.0210187	0.800906	680454	2.69683e+06	positive	0.992959
X - 12729	Direct_bilirubin_umol_L_PGS000681	Under 45	metabolomics	0.1414	-0.00043864	0.670401	1.07822e+07	2.53178e+07	positive	0.983189
X - 12798	Direct_bilirubin_umol_L_PGS000681	Under 45	metabolomics	0.16465	0.0293345	0.727451	831815	2.38528e+06	positive	0.986719
X - 14056	Direct_bilirubin_umol_L_PGS000681	Under 45	metabolomics	0.121026	-0.0171775	0.134533	3.11846e+06	2.08035e+06	positive	0.89705
X - 12844	Direct_bilirubin_umol_L_PGS000681	Under 45	metabolomics	0.142129	0.00581426	0.863604	-275504	1.60287e+06	negative	0.995168
X - 12849	Direct_bilirubin_umol_L_PGS000681	Under 45	metabolomics	0.174793	0.0341326	0.278367	-1.13085e+07	1.04193e+07	negative	0.940421
X - 15469	Direct_bilirubin_umol_L_PGS000681	Under 45	metabolomics	0.125053	-0.0133882	0.918473	-305749	2.98548e+06	negative	0.997055
X - 13728	Direct_bilirubin_umol_L_PGS000681	Under 45	metabolomics	0.205175	0.0738716	0.286333	-5.39173e+06	5.05101e+06	negative	0.941898
X - 13835	Direct_bilirubin_umol_L_PGS000681	Under 45	metabolomics	0.174881	0.0364384	0.879451	680947	4.48724e+06	positive	0.995842
X - 14939	Direct_bilirubin_umol_L_PGS000681	Under 45	metabolomics	0.135374	-0.00143442	0.669075	-1.35898e+06	3.17752e+06	negative	0.982983
X - 15492	Direct_bilirubin_umol_L_PGS000681	Under 45	metabolomics	0.192944	0.0641588	0.0226816	4.25372e+06	1.86054e+06	positive	0.738889
X - 21607	Direct_bilirubin_umol_L_PGS000681	Under 45	metabolomics	0.136666	-0.0028821	0.272231	-2.70454e+06	2.46036e+06	negative	0.939143
X - 16935	Direct_bilirubin_umol_L_PGS000681	Under 45	metabolomics	0.140973	0.00618805	0.0114555	1.00563e+07	3.96181e+06	positive	0.665765
X - 16944	Direct_bilirubin_umol_L_PGS000681	Under 45	metabolomics	0.145445	0.00936908	0.500043	1.69661e+06	2.51371e+06	positive	0.969922
X - 18901	Direct_bilirubin_umol_L_PGS000681	Under 45	metabolomics	0.147948	0.0122706	0.0292275	-5.05156e+07	2.30973e+07	negative	0.765639
X - 18913	Direct_bilirubin_umol_L_PGS000681	Under 45	metabolomics	0.117424	-0.0225198	0.130721	5.36228e+06	3.54204e+06	positive	0.894325
X - 18922	Direct_bilirubin_umol_L_PGS000681	Under 45	metabolomics	0.135029	-0.00125838	0.414487	1.85015e+06	2.26529e+06	positive	0.960722
X - 19141	Direct_bilirubin_umol_L_PGS000681	Under 45	metabolomics	0.159861	0.026927	0.965105	-127395	2.91046e+06	negative	0.999247
X - 17653	Direct_bilirubin_umol_L_PGS000681	Under 45	metabolomics	0.131368	-0.0066564	0.00387897	6.74119e+06	2.32279e+06	positive	0.524662
X - 17690	Direct_bilirubin_umol_L_PGS000681	Under 45	metabolomics	0.13048	-0.0109817	0.308005	2.01245e+07	1.97194e+07	positive	0.945958
X - 21736	Direct_bilirubin_umol_L_PGS000681	Under 45	metabolomics	0.110925	-0.0294558	0.389629	-3.83923e+06	4.45862e+06	negative	0.958683
X - 11522	Direct_bilirubin_umol_L_PGS000681	Under 45	metabolomics	0.242323	0.122184	6.8118e-17	2.0274e+07	2.33772e+06	positive	4.9343e-13
X - 17676	Direct_bilirubin_umol_L_PGS000681	Under 45	metabolomics	0.139297	0.000474258	0.0284949	-5.21973e+06	2.37557e+06	negative	0.764293
X - 21796	Direct_bilirubin_umol_L_PGS000681	Under 45	metabolomics	0.148758	0.0140673	8.65582e-05	6.15535e+06	1.55449e+06	positive	0.091757
X - 15503	Direct_bilirubin_umol_L_PGS000681	Under 45	metabolomics	0.147249	0.0128872	0.170709	1.92469e+06	1.40283e+06	positive	0.911125
X - 12822	Direct_bilirubin_umol_L_PGS000681	Under 45	metabolomics	0.131451	-0.00863741	0.168738	3.55998e+06	2.58266e+06	positive	0.910067
X - 21829	Direct_bilirubin_umol_L_PGS000681	Under 45	metabolomics	0.132859	-0.00405839	0.561604	1.91312e+06	3.29354e+06	positive	0.97539
X - 16570	Direct_bilirubin_umol_L_PGS000681	Under 45	metabolomics	0.134667	-0.00196456	0.316406	2.92014e+06	2.91161e+06	positive	0.947416
X - 22162	Direct_bilirubin_umol_L_PGS000681	Under 45	metabolomics	0.183416	0.0536625	0.770011	-443249	1.51523e+06	negative	0.989905
X - 12680	Direct_bilirubin_umol_L_PGS000681	Under 45	metabolomics	0.173664	0.0406702	0.386814	2.79111e+06	3.22216e+06	positive	0.958229
X - 12101	Direct_bilirubin_umol_L_PGS000681	Under 45	metabolomics	0.119198	-0.0204642	0.814728	-788819	3.36439e+06	negative	0.993085
X - 11483	Direct_bilirubin_umol_L_PGS000681	Under 45	metabolomics	0.139476	0.00360417	0.440328	-5.79836e+06	7.50803e+06	negative	0.964176
X - 18899	Direct_bilirubin_umol_L_PGS000681	Under 45	metabolomics	0.219402	0.0872471	0.196027	-2.90145e+06	2.24066e+06	negative	0.919348
X - 18921	Direct_bilirubin_umol_L_PGS000681	Under 45	metabolomics	0.123435	-0.0146793	0.949901	-194261	3.0902e+06	negative	0.998914
X - 12100	Direct_bilirubin_umol_L_PGS000681	Under 45	metabolomics	0.158203	0.0252882	0.334729	940266	973749	positive	0.949654
X - 13431	Direct_bilirubin_umol_L_PGS000681	Under 45	metabolomics	0.150823	0.00770364	0.499013	-2.27283e+06	3.35921e+06	negative	0.969873
X - 15666	Direct_bilirubin_umol_L_PGS000681	Under 45	metabolomics	0.114544	-0.0258556	0.547886	-895265	1.48872e+06	negative	0.974428
X - 16397	Direct_bilirubin_umol_L_PGS000681	Under 45	metabolomics	0.119487	-0.0231444	0.93016	161723	1.84423e+06	positive	0.997858
X - 16580	Direct_bilirubin_umol_L_PGS000681	Under 45	metabolomics	0.0975988	-0.0448856	0.894956	-278799	2.11042e+06	negative	0.996202
X - 17335	Direct_bilirubin_umol_L_PGS000681	Under 45	metabolomics	0.133125	-0.00669361	0.112908	-2.93211e+06	1.84611e+06	negative	0.884533
X - 17340	Direct_bilirubin_umol_L_PGS000681	Under 45	metabolomics	0.181304	0.0512143	0.00912299	6.02533e+06	2.30131e+06	positive	0.640217
X - 12026	Direct_bilirubin_umol_L_PGS000681	Under 45	metabolomics	0.188258	0.0600885	0.187939	1.62351e+06	1.23124e+06	positive	0.916848
X - 12707	Direct_bilirubin_umol_L_PGS000681	Under 45	metabolomics	0.162931	0.0208946	0.870563	-331490	2.03322e+06	negative	0.995307
X - 12906	Direct_bilirubin_umol_L_PGS000681	Under 45	metabolomics	0.125191	-0.0177515	0.849861	-305938	1.61527e+06	negative	0.994649
X - 13729	Direct_bilirubin_umol_L_PGS000681	Under 45	metabolomics	0.111104	-0.0325759	0.710902	-1.06121e+06	2.86138e+06	negative	0.98564
X - 16087	Direct_bilirubin_umol_L_PGS000681	Under 45	metabolomics	0.170368	0.0305422	0.605882	-1.35233e+06	2.61913e+06	negative	0.978786
X - 17010	Direct_bilirubin_umol_L_PGS000681	Under 45	metabolomics	0.160977	0.0250657	0.989494	-30400.5	2.3075e+06	negative	0.999601
X - 17351	Direct_bilirubin_umol_L_PGS000681	Under 45	metabolomics	0.178575	0.0419745	0.295715	6.51616e+06	6.22435e+06	positive	0.943175
X - 17357	Direct_bilirubin_umol_L_PGS000681	Under 45	metabolomics	0.18412	0.054203	0.519355	1.11807e+06	1.73392e+06	positive	0.971394
X - 18886	Direct_bilirubin_umol_L_PGS000681	Under 45	metabolomics	0.161535	0.0224092	0.856494	472150	2.6094e+06	positive	0.994977
X - 22776	Direct_bilirubin_umol_L_PGS000681	Under 45	metabolomics	0.172753	0.034879	0.681494	-992627	2.41696e+06	negative	0.984007
X - 23314	Direct_bilirubin_umol_L_PGS000681	Under 45	metabolomics	0.143083	0.00604926	0.529679	-6.94995e+06	1.10498e+07	negative	0.972587
X - 23587	Direct_bilirubin_umol_L_PGS000681	Under 45	metabolomics	0.150026	0.00314051	0.937875	1.042e+06	1.33614e+07	positive	0.998426
X - 23590	Direct_bilirubin_umol_L_PGS000681	Under 45	metabolomics	0.131918	-0.0147175	0.132651	2.78174e+06	1.8465e+06	positive	0.895921
X - 23636	Direct_bilirubin_umol_L_PGS000681	Under 45	metabolomics	0.138039	0.00165326	0.339143	-1.51307e+06	1.58134e+06	negative	0.951243
X - 23639	Direct_bilirubin_umol_L_PGS000681	Under 45	metabolomics	0.151011	0.0161086	0.771935	568794	1.96129e+06	positive	0.990229
X - 23644	Direct_bilirubin_umol_L_PGS000681	Under 45	metabolomics	0.156338	0.0231281	0.0666179	-1.97833e+07	1.07607e+07	negative	0.842162
X - 23678	Direct_bilirubin_umol_L_PGS000681	Under 45	metabolomics	0.145157	0.00638343	0.251269	-2.48545e+06	2.16368e+06	negative	0.934996
X - 23680	Direct_bilirubin_umol_L_PGS000681	Under 45	metabolomics	0.130847	-0.00725958	0.284881	2.3126e+06	2.16003e+06	positive	0.941446
X - 11315	Direct_bilirubin_umol_L_PGS000681	Under 45	metabolomics	0.179156	0.0492753	0.230511	-3.21134e+06	2.67481e+06	negative	0.931002
X - 23739	Direct_bilirubin_umol_L_PGS000681	Under 45	metabolomics	0.121628	-0.0206568	0.61177	-681674	1.34216e+06	negative	0.979318
X - 23780	Direct_bilirubin_umol_L_PGS000681	Under 45	metabolomics	0.186751	0.0478132	0.87902	712002	4.67498e+06	positive	0.995771
X - 23782	Direct_bilirubin_umol_L_PGS000681	Under 45	metabolomics	0.129193	-0.00888401	0.659675	1.02924e+06	2.33579e+06	positive	0.982297
X - 23974	Direct_bilirubin_umol_L_PGS000681	Under 45	metabolomics	0.136478	-0.0110484	0.0528893	3.71663e+06	1.91473e+06	positive	0.82461
X - 23997	Direct_bilirubin_umol_L_PGS000681	Under 45	metabolomics	0.155685	0.0177248	0.670517	1.33871e+06	3.14463e+06	positive	0.983218
X - 24243	Direct_bilirubin_umol_L_PGS000681	Under 45	metabolomics	0.122448	-0.0228425	0.0537334	5.16076e+06	2.66842e+06	positive	0.824924
X - 24295	Direct_bilirubin_umol_L_PGS000681	Under 45	metabolomics	0.139731	0.00361239	0.589641	1.34238e+06	2.48716e+06	positive	0.977445
X - 24306	Direct_bilirubin_umol_L_PGS000681	Under 45	metabolomics	0.142692	0.0070422	0.933504	-165493	1.9824e+06	negative	0.998197
X - 24307	Direct_bilirubin_umol_L_PGS000681	Under 45	metabolomics	0.159121	0.0263501	0.0710746	3.5208e+06	1.94621e+06	positive	0.84818
X - 24328	Direct_bilirubin_umol_L_PGS000681	Under 45	metabolomics	0.175972	0.0447578	0.101825	4.0271e+06	2.45664e+06	positive	0.87502
X - 24337	Direct_bilirubin_umol_L_PGS000681	Under 45	metabolomics	0.182727	0.0468168	0.0212291	6.36342e+06	2.75238e+06	positive	0.73083
X - 24522	Direct_bilirubin_umol_L_PGS000681	Under 45	metabolomics	0.12643	-0.0349435	0.934535	210233	2.55786e+06	positive	0.998237
X - 24544	Direct_bilirubin_umol_L_PGS000681	Under 45	metabolomics	0.149278	0.0143859	0.0657813	5.22311e+06	2.83221e+06	positive	0.841752
X - 24556	Direct_bilirubin_umol_L_PGS000681	Under 45	metabolomics	0.12444	-0.0186256	0.496978	1.62805e+06	2.39492e+06	positive	0.96953
X - 24588	Direct_bilirubin_umol_L_PGS000681	Under 45	metabolomics	0.147299	0.011519	0.126585	2.47318e+06	1.61601e+06	positive	0.891327
X - 24699	Direct_bilirubin_umol_L_PGS000681	Under 45	metabolomics	0.135367	-0.00144199	0.584944	489024	894743	positive	0.977164
X - 24728	Direct_bilirubin_umol_L_PGS000681	Under 45	metabolomics	0.146635	-0.00431434	0.3142	2.10013e+06	2.0842e+06	positive	0.946819
X - 24813	Direct_bilirubin_umol_L_PGS000681	Under 45	metabolomics	0.12855	-0.00904713	0.0111479	2.05261e+06	805576	positive	0.662169
X - 24849	Direct_bilirubin_umol_L_PGS000681	Under 45	metabolomics	0.252276	0.134462	1.09533e-16	2.12239e+07	2.46571e+06	positive	7.71988e-13
S-1-pyrroline-5-carboxylate	Direct_bilirubin_umol_L_PGS000681	Over 45	metabolomics	0.0835948	-0.000840613	0.209558	1.4906e+06	1.187e+06	positive	0.924459
spermidine	Direct_bilirubin_umol_L_PGS000681	Over 45	metabolomics	0.0868554	5.46354e-05	0.839776	443130	2.19104e+06	positive	0.99401
1-methylnicotinamide	Direct_bilirubin_umol_L_PGS000681	Over 45	metabolomics	0.0775256	-0.00543071	0.311901	-6.32452e+06	6.25043e+06	negative	0.946819
12,13-DiHOME	Direct_bilirubin_umol_L_PGS000681	Over 45	metabolomics	0.106191	0.0214429	0.884775	290528	2.00412e+06	positive	0.99601
alpha-ketoglutarate	Direct_bilirubin_umol_L_PGS000681	Over 45	metabolomics	0.0852823	0.00302356	0.298962	-1.67569e+06	1.61231e+06	negative	0.943858
kynurenate	Direct_bilirubin_umol_L_PGS000681	Over 45	metabolomics	0.0997073	0.0187458	0.192769	1.55277e+06	1.19125e+06	positive	0.918428
3-hydroxyisobutyrate	Direct_bilirubin_umol_L_PGS000681	Over 45	metabolomics	0.0986769	0.01733	0.686541	-733695	1.81745e+06	negative	0.984241
3-hydroxy-3-methylglutarate	Direct_bilirubin_umol_L_PGS000681	Over 45	metabolomics	0.0933606	0.011534	0.874363	-180037	1.13826e+06	negative	0.995465
3-phosphoglycerate	Direct_bilirubin_umol_L_PGS000681	Over 45	metabolomics	0.0660454	-0.0215129	0.453678	2.45317e+06	3.27236e+06	positive	0.965696
cholate	Direct_bilirubin_umol_L_PGS000681	Over 45	metabolomics	0.0585034	-0.0286722	0.440353	-1.89752e+07	2.458e+07	negative	0.964176
5,6-dihydrothymine	Direct_bilirubin_umol_L_PGS000681	Over 45	metabolomics	0.110453	0.0291914	0.255796	945151	831138	positive	0.936048
hypoxanthine	Direct_bilirubin_umol_L_PGS000681	Over 45	metabolomics	0.102869	0.0226725	0.459394	1.44842e+06	1.95683e+06	positive	0.966318
9,10-DiHOME	Direct_bilirubin_umol_L_PGS000681	Over 45	metabolomics	0.0829202	-0.00675517	0.130747	3.16199e+06	2.09018e+06	positive	0.894342
linoleate (18:2n6)	Direct_bilirubin_umol_L_PGS000681	Over 45	metabolomics	0.123523	0.0449859	0.0421997	-2.83096e+06	1.39137e+06	negative	0.803461
laurate (12:0)	Direct_bilirubin_umol_L_PGS000681	Over 45	metabolomics	0.0936411	0.0125231	0.610995	-1.48581e+06	2.91997e+06	negative	0.979311
quinolinate	Direct_bilirubin_umol_L_PGS000681	Over 45	metabolomics	0.116884	0.0370841	0.30461	1.7993e+06	1.7516e+06	positive	0.945174
N6,N6,N6-trimethyllysine	Direct_bilirubin_umol_L_PGS000681	Over 45	metabolomics	0.0839121	0.00172716	0.568967	-993775	1.74408e+06	negative	0.975911
N-acetylputrescine	Direct_bilirubin_umol_L_PGS000681	Over 45	metabolomics	0.0746562	-0.00865803	0.295084	1.06206e+06	1.01371e+06	positive	0.943093
N-formylmethionine	Direct_bilirubin_umol_L_PGS000681	Over 45	metabolomics	0.0933109	0.0115781	0.580724	-382722	692653	negative	0.976712
S-adenosylhomocysteine (SAH)	Direct_bilirubin_umol_L_PGS000681	Over 45	metabolomics	0.101445	0.0195598	0.213997	1.3685e+06	1.10042e+06	positive	0.925657
adenosine 5'-monophosphate (AMP)	Direct_bilirubin_umol_L_PGS000681	Over 45	metabolomics	0.0855447	0.00241242	0.640158	-1.30488e+06	2.79029e+06	negative	0.98044
5-methylthioadenosine (MTA)	Direct_bilirubin_umol_L_PGS000681	Over 45	metabolomics	0.10247	0.0215631	0.994461	-6982.89	1.00566e+06	negative	0.999868
arachidonate (20:4n6)	Direct_bilirubin_umol_L_PGS000681	Over 45	metabolomics	0.109981	0.0296546	0.00398486	-3.97148e+06	1.37544e+06	negative	0.526953
arginine	Direct_bilirubin_umol_L_PGS000681	Over 45	metabolomics	0.0990727	0.0180541	0.205305	698608	551139	positive	0.923444
aspartate	Direct_bilirubin_umol_L_PGS000681	Over 45	metabolomics	0.106672	0.0265289	0.755343	-389724	1.2503e+06	negative	0.988665
3-(4-hydroxyphenyl)lactate	Direct_bilirubin_umol_L_PGS000681	Over 45	metabolomics	0.104794	0.0244822	0.229857	-1.29698e+06	1.07937e+06	negative	0.930864
phenylpyruvate	Direct_bilirubin_umol_L_PGS000681	Over 45	metabolomics	0.0806955	-0.00257488	0.774872	329608	1.15207e+06	positive	0.990686
beta-alanine	Direct_bilirubin_umol_L_PGS000681	Over 45	metabolomics	0.0693841	-0.0146065	0.972894	28961.2	852059	positive	0.999532
biliverdin	Direct_bilirubin_umol_L_PGS000681	Over 45	metabolomics	0.289097	0.225013	2.40675e-45	2.06503e+07	1.37401e+06	positive	5.23016e-41
succinate	Direct_bilirubin_umol_L_PGS000681	Over 45	metabolomics	0.0815541	-0.00074397	0.926777	205447	2.23486e+06	positive	0.997497
3-hydroxybutyrate (BHBA)	Direct_bilirubin_umol_L_PGS000681	Over 45	metabolomics	0.1116	0.0318036	0.396372	-7.1068e+06	8.37517e+06	negative	0.95917
cholesterol	Direct_bilirubin_umol_L_PGS000681	Over 45	metabolomics	0.10676	0.0260456	0.934899	91856.8	1.12421e+06	positive	0.998273
choline phosphate	Direct_bilirubin_umol_L_PGS000681	Over 45	metabolomics	0.0790086	-0.0039138	0.529755	-687207	1.09316e+06	negative	0.972649
cortisone	Direct_bilirubin_umol_L_PGS000681	Over 45	metabolomics	0.0871711	0.00478583	0.0687009	-1.57583e+06	864537	negative	0.844432
creatinine	Direct_bilirubin_umol_L_PGS000681	Over 45	metabolomics	0.10128	0.0208452	0.521096	219817	342432	positive	0.971573
cysteinylglycine	Direct_bilirubin_umol_L_PGS000681	Over 45	metabolomics	0.0832148	-0.00393204	0.25498	-2.35616e+06	2.06832e+06	negative	0.935898
cystine	Direct_bilirubin_umol_L_PGS000681	Over 45	metabolomics	0.0815628	-0.00103044	0.598834	1.17853e+06	2.23936e+06	positive	0.977949
sphingosine	Direct_bilirubin_umol_L_PGS000681	Over 45	metabolomics	0.0788167	-0.00402357	0.97267	157362	4.59187e+06	positive	0.999532
deoxycholate	Direct_bilirubin_umol_L_PGS000681	Over 45	metabolomics	0.0855981	-0.00463894	0.44194	4.14961e+06	5.39384e+06	positive	0.964435
sphinganine	Direct_bilirubin_umol_L_PGS000681	Over 45	metabolomics	0.0847768	0.00217543	0.3172	-4.1525e+06	4.14905e+06	negative	0.947636
fumarate	Direct_bilirubin_umol_L_PGS000681	Over 45	metabolomics	0.0753628	-0.00788781	0.0407469	-1.8817e+06	918225	negative	0.797133
gamma-glutamylglutamate	Direct_bilirubin_umol_L_PGS000681	Over 45	metabolomics	0.0764699	-0.00883149	0.163181	2.52561e+06	1.80955e+06	positive	0.908259
gluconate	Direct_bilirubin_umol_L_PGS000681	Over 45	metabolomics	0.0709958	-0.0127485	0.532705	-777758	1.24612e+06	negative	0.973158
glutarate (C5-DC)	Direct_bilirubin_umol_L_PGS000681	Over 45	metabolomics	0.102517	0.0179554	0.68991	-1.81528e+06	4.54817e+06	negative	0.984396
glycine	Direct_bilirubin_umol_L_PGS000681	Over 45	metabolomics	0.0806602	-0.00201421	0.542238	-502333	823925	negative	0.974193
glycocholate	Direct_bilirubin_umol_L_PGS000681	Over 45	metabolomics	0.062886	-0.0210848	0.125732	1.59998e+07	1.04391e+07	positive	0.890581
guanidinoacetate	Direct_bilirubin_umol_L_PGS000681	Over 45	metabolomics	0.104798	0.0239067	0.918998	112656	1.10744e+06	positive	0.997057
histidine	Direct_bilirubin_umol_L_PGS000681	Over 45	metabolomics	0.0697704	-0.0135836	0.81727	132116	571608	positive	0.993085
cortisol	Direct_bilirubin_umol_L_PGS000681	Over 45	metabolomics	0.0893079	0.00741113	0.157162	-2.05996e+06	1.45482e+06	negative	0.906108
inosine	Direct_bilirubin_umol_L_PGS000681	Over 45	metabolomics	0.0820108	-0.00580709	0.706461	-2.56734e+06	6.81442e+06	negative	0.98532
myo-inositol	Direct_bilirubin_umol_L_PGS000681	Over 45	metabolomics	0.0822714	0.000135731	0.359944	1.12922e+06	1.23281e+06	positive	0.953754
isoleucine	Direct_bilirubin_umol_L_PGS000681	Over 45	metabolomics	0.104235	0.023873	0.925168	46562.6	495589	positive	0.997361
citrulline	Direct_bilirubin_umol_L_PGS000681	Over 45	metabolomics	0.0934506	0.0116321	0.66498	247035	570254	positive	0.98263
leucine	Direct_bilirubin_umol_L_PGS000681	Over 45	metabolomics	0.099271	0.0180755	0.816869	-113368	489400	negative	0.993085
lysine	Direct_bilirubin_umol_L_PGS000681	Over 45	metabolomics	0.0723263	-0.0106994	0.103271	801731	491564	positive	0.876571
malate	Direct_bilirubin_umol_L_PGS000681	Over 45	metabolomics	0.0815066	-0.00109174	0.0243349	-1.94105e+06	860431	negative	0.747512
methionine	Direct_bilirubin_umol_L_PGS000681	Over 45	metabolomics	0.0902861	0.00877049	0.33815	474686	495302	positive	0.950995
palmitate (16:0)	Direct_bilirubin_umol_L_PGS000681	Over 45	metabolomics	0.12263	0.0437293	0.0143878	-2.59632e+06	1.05861e+06	negative	0.690167
nicotinamide	Direct_bilirubin_umol_L_PGS000681	Over 45	metabolomics	0.0624443	-0.0213658	0.731555	-743498	2.16655e+06	negative	0.986951
stearate (18:0)	Direct_bilirubin_umol_L_PGS000681	Over 45	metabolomics	0.115607	0.0361708	0.0264919	-2.09178e+06	941029	negative	0.756733
ornithine	Direct_bilirubin_umol_L_PGS000681	Over 45	metabolomics	0.0761601	-0.00672026	0.176328	931894	688613	positive	0.912077
orotate	Direct_bilirubin_umol_L_PGS000681	Over 45	metabolomics	0.0817474	-0.000239429	0.19885	-2.14314e+06	1.66672e+06	negative	0.920719
palmitoleate (16:1n7)	Direct_bilirubin_umol_L_PGS000681	Over 45	metabolomics	0.10487	0.0243727	0.0381395	-5.40187e+06	2.60124e+06	negative	0.792453
[truncated: 2,427 more rows]

## Sheet: Supplementary Table 3
Age-included VAE results
[truncated: 586 more rows]

[truncated: 7 more sheets: Supplementary Table 4, Supplementary Table 5, Supplementary Table 6, Supplementary Table 7, Supplementary Table 8, Supplementary Table 9, Supplementary Table 10]
